# Supplementary material
Source: Research Square preprint supplement (doi:10.21203/rs.3.rs-9371633/v1)
Supplement: Supplementary file 1 [file 0e3dc4fca184d50d49633a22.xlsx]

## Sheet: all_iv_(5e-8)_insomnia_steiger
exposure	outcome	snp_r2.exposure	snp_r2.outcome	correct_causal_direction	steiger_pval
Excitatory_control_NOL6	insomnia	0.115845	6.79885e-06	TRUE	8.45709e-15
Excitatory_control_LINC00299	insomnia	0.0879685	5.73872e-06	TRUE	2.21753e-11
OPCs_control_KLHDC4	insomnia	0.100241	2.11597e-07	TRUE	5.16878e-13
Microglia_control_OR3A2	insomnia	0.0884175	3.61733e-07	TRUE	1.49193e-11
Oligodendrocytes_control_LINC00251	insomnia	0.0962847	1.53898e-06	TRUE	1.79929e-12
Oligodendrocytes_control_CENPP	insomnia	0.155715	9.5205e-07	TRUE	4.29193e-20
Oligodendrocytes_control_WDSUB1	insomnia	0.0616062	2.76585e-08	TRUE	2.30924e-08
Excitatory_control_UPK1A	insomnia	0.0614781	9.075e-07	TRUE	2.64276e-08
Oligodendrocytes_control_TIMM44	insomnia	0.156042	6.58074e-07	TRUE	3.75145e-20
Oligodendrocytes_control_AGTRAP	insomnia	0.0677168	1.72751e-06	TRUE	5.06193e-09
Excitatory_control_TLCD2	insomnia	0.0696237	4.04068e-07	TRUE	2.74371e-09
Microglia_control_MYO5B	insomnia	0.0727853	1.54967e-05	TRUE	1.80848e-09
Excitatory_control_GRID2IP	insomnia	0.0670271	1.3661e-06	TRUE	5.99618e-09
Endothelial_control_NKTR	insomnia	0.0827712	2.40867e-06	TRUE	8.30257e-11
Astrocytes_control_KANSL1	insomnia	0.190311	1.16507e-05	TRUE	1.35799e-24
Oligodendrocytes_control_LINC02608	insomnia	0.0751556	1.59254e-07	TRUE	5.79696e-10
Oligodendrocytes_control_ADAMTS2	insomnia	0.0602087	3.50697e-06	TRUE	4.18336e-08
Inhibitory_control_COMMD6	insomnia	0.11716	1.74753e-05	TRUE	7.59876e-15
Excitatory_control_C17orf75	insomnia	0.100553	3.3609e-06	TRUE	5.90689e-13
Astrocytes_control_EXOSC6	insomnia	0.0883583	4.83668e-06	TRUE	1.93122e-11
Excitatory_control_ZNF682	insomnia	0.0756915	2.86446e-05	TRUE	9.96544e-10
Oligodendrocytes_control_ZNF404	insomnia	0.0749529	7.6677e-07	TRUE	6.54942e-10
Oligodendrocytes_control_DDX4	insomnia	0.094074	1.23315e-05	TRUE	4.78472e-12
OPCs_control_CLEC18C	insomnia	0.061709	3.12818e-06	TRUE	2.75188e-08
Astrocytes_control_ARL14EP	insomnia	0.0842963	5.06208e-06	TRUE	6.02326e-11
Inhibitory_control_CCZ1B	insomnia	0.0610929	2.09664e-06	TRUE	3.12202e-08
Inhibitory_control_CERS5	insomnia	0.132551	2.67671e-06	TRUE	5.32711e-17
Oligodendrocytes_control_KIAA0930	insomnia	0.0665961	1.70351e-05	TRUE	9.93063e-09
Excitatory_control_VARS2	insomnia	0.0800177	1.82374e-07	TRUE	1.5134e-10
Endothelial_control_PCSK4	insomnia	0.0595186	1.21229e-05	TRUE	6.15056e-08
Microglia_control_BTNL2	insomnia	0.059611	6.15106e-07	TRUE	4.29425e-08
Excitatory_control_TXNDC15	insomnia	0.172503	2.86888e-05	TRUE	5.9311e-22
Astrocytes_control_LINC02652	insomnia	0.0867129	2.01543e-08	TRUE	2.24237e-11
Inhibitory_control_MIR4422HG	insomnia	0.0678223	7.46741e-08	TRUE	4.28315e-09
Oligodendrocytes_control_ANKRD7	insomnia	0.106189	1.38825e-05	TRUE	1.62529e-13
Oligodendrocytes_control_CLEC18A	insomnia	0.0824546	2.42313e-06	TRUE	9.0696e-11
Astrocytes_control_FABP6	insomnia	0.0747509	1.56392e-06	TRUE	7.29701e-10
Excitatory_control_CTSO	insomnia	0.0683027	7.49999e-07	TRUE	4.06486e-09
Microglia_control_KANSL1	insomnia	0.147454	7.47188e-06	TRUE	7.58793e-19
Excitatory_control_LINC02470	insomnia	0.133582	1.23667e-07	TRUE	3.0785e-17
Excitatory_control_GNA15	insomnia	0.0827583	6.75594e-07	TRUE	7.49132e-11
Endothelial_control_SLC1A7	insomnia	0.0843883	3.90536e-06	TRUE	5.64117e-11
Inhibitory_control_ZNF100	insomnia	0.104888	6.04973e-06	TRUE	1.90907e-13
Excitatory_control_EIF2AK3	insomnia	0.0704219	6.31905e-06	TRUE	2.83973e-09
Excitatory_control_ERAP1	insomnia	0.0880396	2.11021e-06	TRUE	1.88535e-11
Oligodendrocytes_control_KAT2B	insomnia	0.0608842	1.47153e-07	TRUE	2.89004e-08
Microglia_control_FAM133B	insomnia	0.0645896	2.02628e-06	TRUE	1.20421e-08
Excitatory_control_C15orf40	insomnia	0.0856358	1.00336e-05	TRUE	4.75937e-11
Oligodendrocytes_control_ZNF160	insomnia	0.097682	2.47312e-05	TRUE	2.19191e-12
Excitatory_control_ALDH8A1	insomnia	0.133792	2.64097e-06	TRUE	3.67757e-17
Inhibitory_control_FPR1	insomnia	0.067636	3.02239e-06	TRUE	5.47351e-09
Oligodendrocytes_control_CTSO	insomnia	0.0627882	1.15374e-06	TRUE	1.87912e-08
Oligodendrocytes_control_SLC25A24	insomnia	0.0680507	9.46259e-06	TRUE	5.83435e-09
Inhibitory_control_LINC00865	insomnia	0.0834632	1.36732e-05	TRUE	9.38325e-11
Excitatory_control_GSTO2	insomnia	0.0910368	5.3146e-06	TRUE	9.28701e-12
Excitatory_control_MVB12B	insomnia	0.0668229	6.05125e-06	TRUE	7.51158e-09
OPCs_control_TRPM3	insomnia	0.0609565	2.60117e-06	TRUE	3.30728e-08
Astrocytes_control_MXRA7	insomnia	0.063208	1.21181e-05	TRUE	2.27955e-08
Endothelial_control_HLA-DRB5	insomnia	0.0932515	6.79069e-06	TRUE	5.23184e-12
Inhibitory_control_PPFIA1	insomnia	0.0798778	7.812e-06	TRUE	2.21189e-10
Microglia_control_HLA-DRB5	insomnia	0.0768667	6.69387e-06	TRUE	4.91655e-10
Oligodendrocytes_control_PRSS55	insomnia	0.0648907	2.83929e-05	TRUE	1.8342e-08
Excitatory_control_PAH	insomnia	0.0967774	1.36002e-05	TRUE	2.308e-12
Inhibitory_control_AMH	insomnia	0.0630344	7.49006e-06	TRUE	2.17345e-08
Excitatory_control_THG1L	insomnia	0.0653301	1.70987e-06	TRUE	9.69974e-09
OPCs_control_TXNDC15	insomnia	0.106432	2.86888e-05	TRUE	1.98611e-13
Excitatory_control_ESRRB	insomnia	0.0720279	1.84739e-06	TRUE	1.56505e-09
Oligodendrocytes_control_PFKL	insomnia	0.0739413	1.1331e-07	TRUE	8.03222e-10
Excitatory_control_U2AF1	insomnia	0.2522	1.11177e-06	TRUE	5.33678e-34
Excitatory_control_ANKRD36B	insomnia	0.21247	9.35047e-07	TRUE	5.16125e-28
Oligodendrocytes_control_MIR4300HG	insomnia	0.105374	1.86729e-06	TRUE	1.38631e-13
Excitatory_control_REELD1	insomnia	0.0725605	4.10122e-06	TRUE	1.48144e-09
Oligodendrocytes_control_TMEM132C	insomnia	0.0862107	1.07629e-06	TRUE	2.95235e-11
Excitatory_control_PDLIM4	insomnia	0.123386	1.98953e-06	TRUE	7.61568e-16
Astrocytes_control_SLC25A24	insomnia	0.0827669	6.87031e-06	TRUE	9.71584e-11
Excitatory_control_CYP2D6	insomnia	0.0883193	2.26517e-05	TRUE	2.8703e-11
Astrocytes_control_GSTM5	insomnia	0.0901689	1.2381e-06	TRUE	9.86836e-12
Oligodendrocytes_control_MRPS22	insomnia	0.123752	1.6824e-07	TRUE	5.70819e-16
Oligodendrocytes_control_LURAP1L	insomnia	0.181645	3.53795e-06	TRUE	1.54756e-23
Oligodendrocytes_control_DSCC1	insomnia	0.0710744	4.37541e-06	TRUE	2.24482e-09
Oligodendrocytes_control_ZDHHC14	insomnia	0.105794	3.45894e-07	TRUE	1.08123e-13
Oligodendrocytes_control_PLEKHH2	insomnia	0.0654577	4.99919e-08	TRUE	8.13012e-09
Inhibitory_control_RPN1	insomnia	0.130799	2.7224e-07	TRUE	7.27219e-17
Oligodendrocytes_control_LINC02482	insomnia	0.0613678	1.12093e-06	TRUE	2.75896e-08
Excitatory_control_TOPAZ1	insomnia	0.098555	2.66385e-07	TRUE	8.42134e-13
Excitatory_control_LGI4	insomnia	0.077768	5.1465e-07	TRUE	2.94459e-10
OPCs_control_MIR4300HG	insomnia	0.0868793	1.56045e-06	TRUE	2.52861e-11
Astrocytes_control_SPATA1	insomnia	0.0748963	2.664e-06	TRUE	7.39312e-10
Excitatory_control_LAMA5	insomnia	0.0604031	2.07342e-05	TRUE	5.53892e-08
Astrocytes_control_DNAH7	insomnia	0.069538	8.10843e-06	TRUE	3.77814e-09
Excitatory_control_RUNX1	insomnia	0.0794174	2.07197e-05	TRUE	3.22491e-10
OPCs_control_NIPAL3	insomnia	0.0873837	3.33272e-06	TRUE	2.39526e-11
Oligodendrocytes_control_EIF4E2	insomnia	0.0749633	2.27116e-07	TRUE	6.17931e-10
Excitatory_control_LINC00865	insomnia	0.0952382	1.36e-05	TRUE	3.54916e-12
Astrocytes_control_ZNF534	insomnia	0.122374	9.66597e-07	TRUE	9.48299e-16
Oligodendrocytes_control_OTUD7A	insomnia	0.118903	1.44858e-07	TRUE	2.35042e-15
Excitatory_control_CFAP97D2	insomnia	0.0961178	1.26183e-06	TRUE	1.85114e-12
Oligodendrocytes_control_LINC00499	insomnia	0.0639964	3.15328e-06	TRUE	1.481e-08
Inhibitory_control_EFHB	insomnia	0.13472	1.37009e-05	TRUE	4.12654e-17
Oligodendrocytes_control_ECM2	insomnia	0.0666127	8.73223e-07	TRUE	6.50902e-09
Astrocytes_control_FBXO7	insomnia	0.0966431	1.32709e-06	TRUE	1.6025e-12
Oligodendrocytes_control_OR2L13	insomnia	0.0788412	3.67727e-07	TRUE	2.15234e-10
Oligodendrocytes_control_CERS5	insomnia	0.0845101	5.5669e-10	TRUE	4.08057e-11
Excitatory_control_GPR161	insomnia	0.0611953	3.49041e-06	TRUE	3.20208e-08
Excitatory_control_C20orf96	insomnia	0.069947	1.84341e-05	TRUE	4.10028e-09
Oligodendrocytes_control_LINS1	insomnia	0.0954765	4.67815e-07	TRUE	2.06957e-12
Excitatory_control_UNC79	insomnia	0.0609687	5.40555e-06	TRUE	3.60469e-08
Excitatory_control_LINC00326	insomnia	0.127235	1.32022e-07	TRUE	2.03072e-16
Oligodendrocytes_control_COL11A1	insomnia	0.060005	1.66617e-08	TRUE	3.55479e-08
Oligodendrocytes_control_COL28A1	insomnia	0.123323	2.90223e-06	TRUE	8.18113e-16
Excitatory_control_NPIPA5	insomnia	0.0912761	2.83268e-06	TRUE	7.89243e-12
Endothelial_control_AJAP1	insomnia	0.0983388	7.51387e-06	TRUE	1.27881e-12
Oligodendrocytes_control_CSRNP3	insomnia	0.0645896	3.99676e-07	TRUE	1.08684e-08
Excitatory_control_CLNS1A	insomnia	0.0656235	4.46777e-07	TRUE	8.23448e-09
Excitatory_control_CLIC5	insomnia	0.108621	6.17389e-06	TRUE	6.60345e-14
OPCs_control_DPYSL5	insomnia	0.109577	3.32747e-07	TRUE	3.63578e-14
OPCs_control_ZNF534	insomnia	0.0767638	7.89029e-07	TRUE	3.98092e-10
Excitatory_control_TOGARAM2	insomnia	0.226268	2.30792e-06	TRUE	5.45422e-30
Oligodendrocytes_control_KANSL1	insomnia	0.162855	7.47453e-06	TRUE	6.82879e-21
Oligodendrocytes_control_OR7C1	insomnia	0.0625386	1.38383e-05	TRUE	2.81293e-08
Oligodendrocytes_control_CRTAP	insomnia	0.0653145	1.67966e-05	TRUE	1.39789e-08
OPCs_control_AKNA	insomnia	0.0626517	5.8668e-06	TRUE	2.31628e-08
Excitatory_control_RRP15	insomnia	0.12409	1.26183e-07	TRUE	5.11963e-16
Excitatory_control_ALG6	insomnia	0.115327	4.44476e-07	TRUE	7.00426e-15
Excitatory_control_OR2L3	insomnia	0.071419	3.67727e-07	TRUE	1.66914e-09
Astrocytes_control_TAF1C	insomnia	0.0736633	6.69046e-06	TRUE	1.18309e-09
Excitatory_control_RUBCNL	insomnia	0.0868144	4.38343e-06	TRUE	2.92245e-11
Excitatory_control_ROR2	insomnia	0.137112	1.4881e-07	TRUE	1.07926e-17
OPCs_control_TXNL4B	insomnia	0.0683201	4.1635e-06	TRUE	4.72778e-09
Inhibitory_control_LDHC	insomnia	0.143131	4.88534e-07	TRUE	1.8769e-18
Oligodendrocytes_control_CYP4F11	insomnia	0.1298	9.56907e-07	TRUE	1.0653e-16
OPCs_control_DSCC1	insomnia	0.077563	4.37541e-06	TRUE	3.78567e-10
Inhibitory_control_ALDH8A1	insomnia	0.082435	2.64097e-06	TRUE	9.20999e-11
Excitatory_control_TRIM69	insomnia	0.0779036	3.14595e-06	TRUE	3.2952e-10
Excitatory_control_FAM118A	insomnia	0.234875	5.07597e-07	TRUE	2.252e-31
Oligodendrocytes_control_PTPN1	insomnia	0.0979146	1.34243e-06	TRUE	1.11981e-12
Oligodendrocytes_control_PILRB	insomnia	0.0633668	8.38407e-07	TRUE	1.57314e-08
Astrocytes_control_ATP5MC2	insomnia	0.0698668	5.05782e-06	TRUE	3.18851e-09
Oligodendrocytes_control_SUMF1	insomnia	0.0749529	4.32453e-08	TRUE	5.96613e-10
Excitatory_control_TYW3	insomnia	0.110323	4.86239e-06	TRUE	3.86756e-14
Endothelial_control_XRRA1	insomnia	0.136146	1.96689e-07	TRUE	1.45691e-17
Inhibitory_control_LCA5L	insomnia	0.0686868	6.06448e-06	TRUE	4.52537e-09
Excitatory_control_FAM114A2	insomnia	0.130825	8.44911e-06	TRUE	1.12455e-16
Excitatory_control_POMC	insomnia	0.0938307	3.92517e-06	TRUE	4.03712e-12
Oligodendrocytes_control_HIBADH	insomnia	0.093857	1.18797e-06	TRUE	3.48449e-12
OPCs_control_MAEL	insomnia	0.0863215	3.64634e-06	TRUE	3.26176e-11
Oligodendrocytes_control_APIP	insomnia	0.170104	1.39264e-06	TRUE	5.12833e-22
Excitatory_control_KIF20B	insomnia	0.0700846	1.3693e-06	TRUE	2.59944e-09
Oligodendrocytes_control_ZNF534	insomnia	0.152627	9.30561e-08	TRUE	9.65954e-20
Excitatory_control_BTBD16	insomnia	0.157078	4.04977e-07	TRUE	2.63116e-20
OPCs_control_MFGE8	insomnia	0.0651766	1.07933e-06	TRUE	9.76336e-09
Oligodendrocytes_control_PDE7A	insomnia	0.0796313	2.34539e-05	TRUE	3.17e-10
OPCs_control_GPNMB	insomnia	0.0809121	4.92708e-07	TRUE	1.22858e-10
Oligodendrocytes_control_IGHMBP2	insomnia	0.0664084	8.37999e-07	TRUE	6.86426e-09
Oligodendrocytes_control_SCART1	insomnia	0.063969	3.44708e-06	TRUE	1.50714e-08
Excitatory_control_ANAPC4	insomnia	0.0659327	1.28488e-07	TRUE	7.2681e-09
Inhibitory_control_SRA1	insomnia	0.0610552	6.58357e-08	TRUE	2.71417e-08
Endothelial_control_SCUBE1	insomnia	0.0895779	1.75989e-07	TRUE	1.04743e-11
Oligodendrocytes_control_ECPAS	insomnia	0.0675144	6.68776e-06	TRUE	6.3276e-09
Astrocytes_control_LINC01954	insomnia	0.119785	8.00747e-08	TRUE	1.78497e-15
Oligodendrocytes_control_C17orf97	insomnia	0.182324	1.2933e-06	TRUE	1.05491e-23
Excitatory_control_GPR55	insomnia	0.0594447	1.89057e-05	TRUE	6.97992e-08
Excitatory_control_LINC00347	insomnia	0.0611694	5.58016e-06	TRUE	3.43042e-08
Astrocytes_control_MCOLN2	insomnia	0.125489	7.73793e-08	TRUE	3.34347e-16
Inhibitory_control_OR51E2	insomnia	0.169343	1.0995e-06	TRUE	6.32725e-22
Oligodendrocytes_control_RAMP1	insomnia	0.0631202	5.93826e-07	TRUE	1.65257e-08
Excitatory_control_RNF8	insomnia	0.0745082	2.244e-06	TRUE	8.07251e-10
Oligodendrocytes_control_LATS1	insomnia	0.0681328	2.18328e-06	TRUE	4.61708e-09
Excitatory_control_DDX11	insomnia	0.225215	7.77301e-08	TRUE	5.72453e-30
Oligodendrocytes_control_PWRN2	insomnia	0.0664558	2.33932e-07	TRUE	6.40247e-09
OPCs_control_FOXN2	insomnia	0.0993883	1.9805e-07	TRUE	6.56949e-13
Oligodendrocytes_control_LINC01500	insomnia	0.066646	2.01914e-08	TRUE	5.81158e-09
Excitatory_control_MCOLN2	insomnia	0.113422	5.21001e-07	TRUE	1.22755e-14
Microglia_control_PPP4R3B	insomnia	0.0593963	4.70606e-06	TRUE	5.40649e-08
Excitatory_control_NES	insomnia	0.0889983	8.78844e-06	TRUE	1.81454e-11
Inhibitory_control_COLEC11	insomnia	0.0802058	1.41175e-05	TRUE	2.3196e-10
Inhibitory_control_HPCAL1	insomnia	0.063915	2.12472e-07	TRUE	1.27789e-08
Oligodendrocytes_control_TMEM179	insomnia	0.0611055	2.43765e-06	TRUE	3.15656e-08
Inhibitory_control_WNK1	insomnia	0.0754821	1.58584e-07	TRUE	5.29367e-10
Astrocytes_control_TNFRSF10C	insomnia	0.0792647	5.33967e-06	TRUE	2.44387e-10
Microglia_control_LMO1	insomnia	0.0684898	1.79244e-06	TRUE	4.11548e-09
Astrocytes_control_ALDH8A1	insomnia	0.0884175	3.23218e-06	TRUE	1.78755e-11
Excitatory_control_NOTUM	insomnia	0.0716679	6.42105e-06	TRUE	2.02788e-09
Oligodendrocytes_control_ESPNL	insomnia	0.0719346	1.49032e-07	TRUE	1.40553e-09
Oligodendrocytes_control_OR2L2	insomnia	0.0953159	3.67727e-07	TRUE	2.13922e-12
Microglia_control_TMEM163	insomnia	0.0701985	9.61744e-07	TRUE	2.45499e-09
Oligodendrocytes_control_NCOA7	insomnia	0.1333	8.77537e-07	TRUE	3.73945e-17
Excitatory_control_TMTC4	insomnia	0.0786817	1.52655e-06	TRUE	2.46159e-10
OPCs_control_AKR1C2	insomnia	0.0817862	1.70057e-07	TRUE	9.2379e-11
Inhibitory_control_FRG1-DT	insomnia	0.088149	8.38335e-07	TRUE	1.68591e-11
Oligodendrocytes_control_DPYSL5	insomnia	0.0894439	5.26745e-07	TRUE	1.13945e-11
Excitatory_control_LRRC37A2	insomnia	0.119173	1.16175e-05	TRUE	3.71478e-15
Inhibitory_control_DPH1	insomnia	0.095329	1.11292e-05	TRUE	3.27527e-12
Excitatory_control_PCDHA9	insomnia	0.0600429	2.05979e-06	TRUE	4.14281e-08
Excitatory_control_CERS3	insomnia	0.0636558	1.64815e-06	TRUE	1.5248e-08
Inhibitory_control_MFSD13A	insomnia	0.0651992	7.80939e-06	TRUE	1.21848e-08
Excitatory_control_LPCAT2	insomnia	0.120742	1.41229e-05	TRUE	2.50573e-15
Oligodendrocytes_control_GRID2	insomnia	0.21213	6.46056e-07	TRUE	5.55795e-28
Excitatory_control_ZNF774	insomnia	0.0657267	1.29455e-07	TRUE	7.69178e-09
Oligodendrocytes_control_LTBP1	insomnia	0.0911734	5.38843e-06	TRUE	8.96375e-12
Microglia_control_SMIM35	insomnia	0.131668	3.28795e-06	TRUE	7.1527e-17
Excitatory_control_PTDSS2	insomnia	0.0726994	1.19179e-06	TRUE	1.25483e-09
Excitatory_control_CCDC65	insomnia	0.0652602	2.16629e-07	TRUE	8.85859e-09
Oligodendrocytes_control_AIFM2	insomnia	0.0596796	8.40678e-06	TRUE	5.48224e-08
Excitatory_control_RFWD3	insomnia	0.0871651	2.04396e-06	TRUE	2.39887e-11
Excitatory_control_NSUN2	insomnia	0.196497	2.68295e-09	TRUE	8.3336e-26
Oligodendrocytes_control_NSF	insomnia	0.077419	4.54584e-06	TRUE	3.96399e-10
OPCs_control_NKAIN4	insomnia	0.0905754	2.1332e-07	TRUE	7.96502e-12
Excitatory_control_CAPN9	insomnia	0.112751	2.99899e-06	TRUE	1.77517e-14
Astrocytes_control_LINC01876	insomnia	0.0996582	2.64758e-06	TRUE	7.36364e-13
Excitatory_control_SPON2	insomnia	0.0602187	9.88074e-07	TRUE	3.73847e-08
Oligodendrocytes_control_GRIN2A	insomnia	0.144606	5.74506e-06	TRUE	1.67873e-18
Excitatory_control_ZNF30	insomnia	0.0818862	1.99148e-09	TRUE	8.51604e-11
Excitatory_control_MTERF3	insomnia	0.0630132	4.77046e-07	TRUE	1.68296e-08
Excitatory_control_ACOT12	insomnia	0.0635085	1.44454e-06	TRUE	1.57034e-08
OPCs_control_LINC00648	insomnia	0.0800794	6.69373e-07	TRUE	1.57433e-10
Astrocytes_control_SPATA7	insomnia	0.0711111	1.54058e-09	TRUE	1.68175e-09
Oligodendrocytes_control_XKR9	insomnia	0.113289	5.66976e-06	TRUE	1.69859e-14
Oligodendrocytes_control_UTP4	insomnia	0.0649967	5.06441e-07	TRUE	9.82672e-09
Microglia_control_MAP3K13	insomnia	0.0627487	4.74307e-06	TRUE	2.18647e-08
Oligodendrocytes_control_C9orf72	insomnia	0.088149	6.93076e-06	TRUE	2.18577e-11
Oligodendrocytes_control_GPR180	insomnia	0.0688745	1.37193e-05	TRUE	5.0737e-09
Excitatory_control_EME1	insomnia	0.0709309	2.27423e-06	TRUE	2.15774e-09
Oligodendrocytes_control_LRRC8A	insomnia	0.0865537	1.89871e-07	TRUE	2.45063e-11
Oligodendrocytes_control_HLA-DMA	insomnia	0.199685	5.11689e-08	TRUE	3.04301e-26
Microglia_control_SLCO4C1	insomnia	0.0621507	4.08816e-07	TRUE	2.11457e-08
Astrocytes_control_ZNF208	insomnia	0.0598297	2.41052e-06	TRUE	4.45418e-08
Excitatory_control_PLEKHS1	insomnia	0.0901053	4.48503e-06	TRUE	1.17101e-11
Excitatory_control_MRAS	insomnia	0.0731184	8.61857e-07	TRUE	1.09347e-09
Endothelial_control_CCDC122	insomnia	0.0616793	9.21374e-07	TRUE	2.50344e-08
Astrocytes_control_FAS	insomnia	0.167123	2.16546e-07	TRUE	1.12022e-21
Inhibitory_control_LINC02268	insomnia	0.082207	7.88708e-08	TRUE	8.0629e-11
Inhibitory_control_HDDC2	insomnia	0.0646544	4.97546e-07	TRUE	1.07793e-08
Inhibitory_control_CAPN8	insomnia	0.123808	7.05971e-08	TRUE	5.47001e-16
Excitatory_control_AGA	insomnia	0.0675004	1.09026e-08	TRUE	4.57471e-09
Oligodendrocytes_control_SV2B	insomnia	0.082059	1.26309e-05	TRUE	1.35294e-10
Astrocytes_control_CPSF4L	insomnia	0.0625759	6.94576e-06	TRUE	2.4283e-08
Inhibitory_control_OR2L3	insomnia	0.0629298	3.67727e-07	TRUE	1.70303e-08
Excitatory_control_LINC00443	insomnia	0.165362	3.87437e-07	TRUE	2.00923e-21
Excitatory_control_ETFDH	insomnia	0.0791022	7.21384e-07	TRUE	2.07373e-10
Astrocytes_control_LRMDA	insomnia	0.083321	2.26867e-05	TRUE	1.13944e-10
Excitatory_control_EFHB	insomnia	0.186942	1.37009e-05	TRUE	4.27298e-24
Excitatory_control_NMRK1	insomnia	0.152283	2.82448e-06	TRUE	1.41738e-19
Oligodendrocytes_control_MTRF1L	insomnia	0.059216	4.97265e-06	TRUE	5.71765e-08
OPCs_control_RGPD8	insomnia	0.0653106	2.39977e-07	TRUE	8.76421e-09
Excitatory_control_LINC00551	insomnia	0.20255	3.87437e-07	TRUE	1.29802e-26
Oligodendrocytes_control_NAPRT	insomnia	0.0794697	9.2466e-07	TRUE	1.90318e-10
Microglia_control_LDHC	insomnia	0.0948038	2.50847e-07	TRUE	2.43213e-12
Excitatory_control_ANKFN1	insomnia	0.0708612	1.7911e-07	TRUE	1.89802e-09
Inhibitory_control_DBF4B	insomnia	0.0731184	4.56102e-06	TRUE	1.29096e-09
Excitatory_control_LINC02540	insomnia	0.0675712	5.3209e-06	TRUE	6.00596e-09
Excitatory_control_RFPL3	insomnia	0.0887072	4.17896e-06	TRUE	1.71142e-11
Oligodendrocytes_control_SLC38A9	insomnia	0.0807846	7.79439e-06	TRUE	1.72188e-10
OPCs_control_TLR1	insomnia	0.0611055	1.25067e-05	TRUE	4.04312e-08
Astrocytes_control_SAMD5	insomnia	0.0620353	7.69948e-06	TRUE	2.85974e-08
Astrocytes_control_LINC01291	insomnia	0.071711	2.01226e-05	TRUE	2.60849e-09
Excitatory_control_SURF1	insomnia	0.0650691	4.81509e-08	TRUE	9.04061e-09
Excitatory_control_HLA-DPB1	insomnia	0.117388	1.80146e-05	TRUE	7.19567e-15
Oligodendrocytes_control_APTX	insomnia	0.068658	2.49645e-07	TRUE	3.51039e-09
Oligodendrocytes_control_ERC2	insomnia	0.0837205	2.34935e-07	TRUE	5.44736e-11
Excitatory_control_FLG	insomnia	0.0717988	1.53501e-07	TRUE	1.46016e-09
Excitatory_control_ACADS	insomnia	0.141685	1.78595e-06	TRUE	3.28491e-18
Excitatory_control_RGPD8	insomnia	0.0677094	2.39977e-07	TRUE	4.54743e-09
Oligodendrocytes_control_LDLRAP1	insomnia	0.107933	4.43894e-06	TRUE	7.54575e-14
Excitatory_control_HLA-B	insomnia	0.065573	7.3287e-08	TRUE	7.92557e-09
Oligodendrocytes_control_TXNDC15	insomnia	0.0962003	2.87755e-05	TRUE	3.52546e-12
Inhibitory_control_ATP5MC2	insomnia	0.0677692	4.99016e-06	TRUE	5.63582e-09
Excitatory_control_CLUL1	insomnia	0.0659189	1.43927e-06	TRUE	8.14872e-09
Excitatory_control_HLA-DMA	insomnia	0.260004	5.11689e-08	TRUE	2.52449e-35
Astrocytes_control_HLA-DOB	insomnia	0.102477	7.04779e-07	TRUE	2.90648e-13
Pericytes_control_FAM118A	insomnia	0.0770357	2.98618e-07	TRUE	3.5181e-10
Excitatory_control_AKR1C2	insomnia	0.0999731	4.83464e-07	TRUE	5.79467e-13
Excitatory_control_DCAF13	insomnia	0.0763105	2.41765e-07	TRUE	4.2662e-10
Excitatory_control_ZNF365	insomnia	0.0637573	2.44459e-08	TRUE	1.28257e-08
Oligodendrocytes_control_ZNF846	insomnia	0.0607667	2.151e-07	TRUE	3.01377e-08
Excitatory_control_ZNF257	insomnia	0.0940927	5.13685e-08	TRUE	2.84768e-12
Excitatory_control_PDGFRL	insomnia	0.059611	2.36554e-08	TRUE	3.97037e-08
Astrocytes_control_FSTL5	insomnia	0.0819889	3.86041e-06	TRUE	1.09529e-10
Excitatory_control_ABO	insomnia	0.104675	1.06063e-05	TRUE	2.3123e-13
Excitatory_control_PWP2	insomnia	0.213884	1.20417e-05	TRUE	5.91251e-28
Excitatory_control_CPSF1	insomnia	0.0818192	1.15056e-07	TRUE	9.05636e-11
Oligodendrocytes_control_CYB5A	insomnia	0.0693035	2.14332e-07	TRUE	2.9289e-09
Excitatory_control_FOXN2	insomnia	0.081594	5.06038e-07	TRUE	1.01811e-10
Astrocytes_control_WT1	insomnia	0.0770175	1.48936e-06	TRUE	3.89014e-10
Oligodendrocytes_control_XYLT2	insomnia	0.0773589	2.88787e-06	TRUE	3.78858e-10
Oligodendrocytes_control_ITPR2	insomnia	0.109215	1.58361e-07	TRUE	3.91355e-14
Inhibitory_control_WBP2NL	insomnia	0.0592855	7.59562e-06	TRUE	5.9893e-08
Astrocytes_control_HLA-DMA	insomnia	0.188343	4.87142e-08	TRUE	1.23534e-24
Astrocytes_control_TBC1D31	insomnia	0.113561	9.47068e-06	TRUE	1.76974e-14
Inhibitory_control_C9orf72	insomnia	0.0726432	7.29902e-07	TRUE	1.23381e-09
Oligodendrocytes_control_PDIA2	insomnia	0.0609323	2.36244e-05	TRUE	4.99733e-08
Excitatory_control_FAM162B	insomnia	0.0776912	2.83151e-07	TRUE	2.92856e-10
Excitatory_control_TBC1D26	insomnia	0.0834067	4.36282e-07	TRUE	6.10666e-11
Excitatory_control_TNFRSF13C	insomnia	0.10753	4.33229e-06	TRUE	8.43387e-14
OPCs_control_KLRC2	insomnia	0.0666683	6.52269e-07	TRUE	6.30377e-09
Astrocytes_control_C3orf20	insomnia	0.112398	2.52876e-08	TRUE	1.49835e-14
Oligodendrocytes_control_POU2F3	insomnia	0.0973932	1.21694e-07	TRUE	1.14011e-12
Inhibitory_control_ANKDD1A	insomnia	0.0695019	3.51292e-07	TRUE	2.82023e-09
Excitatory_control_SLC38A8	insomnia	0.0904695	3.17715e-07	TRUE	8.33479e-12
Excitatory_control_ZNF501	insomnia	0.0718211	3.32622e-06	TRUE	1.76507e-09
Astrocytes_control_FAM89A	insomnia	0.0950999	1.07798e-05	TRUE	3.46758e-12
Excitatory_control_METTL21C	insomnia	0.0648907	7.02277e-08	TRUE	9.54851e-09
Oligodendrocytes_control_ARSI	insomnia	0.0734843	4.0398e-06	TRUE	1.14798e-09
Oligodendrocytes_control_PICK1	insomnia	0.0959272	5.2211e-06	TRUE	2.34642e-12
Astrocytes_control_DPYSL5	insomnia	0.0613139	5.71763e-07	TRUE	2.69498e-08
OPCs_control_LINS1	insomnia	0.0796313	4.67815e-07	TRUE	1.74842e-10
Endothelial_control_UMODL1	insomnia	0.0885183	8.50457e-06	TRUE	2.05894e-11
Excitatory_control_EBPL	insomnia	0.0862107	1.09665e-07	TRUE	2.65528e-11
Astrocytes_control_KNOP1	insomnia	0.135013	9.09269e-06	TRUE	3.32691e-17
Excitatory_control_FAM178B	insomnia	0.0608604	1.74596e-06	TRUE	3.27279e-08
Excitatory_control_CRYGA	insomnia	0.077349	6.34868e-06	TRUE	4.26563e-10
OPCs_control_NPIPB2	insomnia	0.122621	6.7991e-06	TRUE	1.18181e-15
Inhibitory_control_CYB5A	insomnia	0.0672497	4.51416e-08	TRUE	4.97251e-09
Oligodendrocytes_control_PYROXD1	insomnia	0.0625947	1.23865e-07	TRUE	1.80609e-08
Oligodendrocytes_control_ABCA6	insomnia	0.102215	7.42224e-08	TRUE	2.8552e-13
Oligodendrocytes_control_PRPSAP2	insomnia	0.0708785	1.30789e-05	TRUE	2.90877e-09
Pericytes_control_CCDC85B	insomnia	0.0631419	1.22848e-07	TRUE	1.55546e-08
OPCs_control_MPPE1	insomnia	0.0891168	3.13368e-06	TRUE	1.46404e-11
Oligodendrocytes_control_CFAP54	insomnia	0.0719577	1.24682e-05	TRUE	2.14428e-09
Excitatory_control_SNX25	insomnia	0.0790235	6.5704e-06	TRUE	2.70751e-10
Pericytes_control_CSNK2A2	insomnia	0.0644944	3.12676e-06	TRUE	1.29211e-08
Excitatory_control_TAF1C	insomnia	0.10801	6.69046e-06	TRUE	7.99842e-14
Inhibitory_control_SLC39A8	insomnia	0.0735194	2.16734e-06	TRUE	1.05591e-09
Oligodendrocytes_control_APPL2	insomnia	0.0996841	4.03734e-06	TRUE	7.77418e-13
Excitatory_control_LSM7	insomnia	0.0626517	7.68929e-07	TRUE	1.90216e-08
Microglia_control_DPH5	insomnia	0.0591704	1.63896e-06	TRUE	5.14697e-08
Inhibitory_control_U2AF1	insomnia	0.209259	1.19068e-06	TRUE	1.55929e-27
Microglia_control_CCL25	insomnia	0.0786393	1.49828e-06	TRUE	2.48784e-10
Excitatory_control_LINC01114	insomnia	0.0745733	8.57833e-06	TRUE	9.67095e-10
Astrocytes_control_SLC28A2	insomnia	0.0604453	6.00987e-06	TRUE	4.21834e-08
Oligodendrocytes_control_SNX19	insomnia	0.194043	1.47512e-06	TRUE	2.43713e-25
Inhibitory_control_APOLD1	insomnia	0.0839496	9.73299e-07	TRUE	5.50345e-11
Endothelial_control_EPHB4	insomnia	0.0697497	1.26809e-07	TRUE	2.55218e-09
Endothelial_control_GNA14	insomnia	0.0705946	2.75119e-05	TRUE	3.90699e-09
Excitatory_control_OR10H5	insomnia	0.076333	8.14124e-06	TRUE	5.9093e-10
OPCs_control_ANKRD18B	insomnia	0.0643409	8.68158e-06	TRUE	1.56758e-08
OPCs_control_TOGARAM2	insomnia	0.073347	1.83917e-06	TRUE	1.08957e-09
Excitatory_control_AQP7	insomnia	0.11152	9.34511e-07	TRUE	2.21974e-14
Oligodendrocytes_control_SLC16A14	insomnia	0.0728437	3.79386e-07	TRUE	1.1295e-09
Oligodendrocytes_control_GSDME	insomnia	0.167218	2.35673e-07	TRUE	1.09258e-21
Inhibitory_control_ZNF534	insomnia	0.0610803	7.89029e-07	TRUE	2.91943e-08
Astrocytes_control_RTN4RL1	insomnia	0.061955	6.43373e-06	TRUE	2.83654e-08
OPCs_control_ANKRD36B	insomnia	0.0819889	9.35047e-07	TRUE	9.46951e-11
Inhibitory_control_MYO15A	insomnia	0.071583	5.06374e-06	TRUE	1.99585e-09
Astrocytes_control_GAS8	insomnia	0.0739019	1.85323e-07	TRUE	8.22541e-10
Endothelial_control_HPSE2	insomnia	0.0604666	1.37726e-06	TRUE	3.57754e-08
Pericytes_control_G6PC2	insomnia	0.0664611	5.77043e-06	TRUE	8.22414e-09
Excitatory_control_MICB	insomnia	0.0971472	6.87764e-06	TRUE	1.7553e-12
Excitatory_control_RESP18	insomnia	0.0633207	3.85197e-08	TRUE	1.45243e-08
Oligodendrocytes_control_HSD17B4	insomnia	0.128916	2.13554e-06	TRUE	1.51176e-16
Inhibitory_control_CABCOCO1	insomnia	0.0632303	1.84893e-06	TRUE	1.7283e-08
Inhibitory_control_SLC7A9	insomnia	0.0771279	4.83474e-07	TRUE	3.50317e-10
Inhibitory_control_CENPP	insomnia	0.156738	9.5205e-07	TRUE	3.1326e-20
Astrocytes_control_ADCY1	insomnia	0.084517	2.82749e-06	TRUE	5.20872e-11
Excitatory_control_SMAD9	insomnia	0.0597057	2.49481e-06	TRUE	4.62186e-08
Inhibitory_control_TRPV2	insomnia	0.0998575	3.93417e-07	TRUE	5.92957e-13
Inhibitory_control_MIR4713HG	insomnia	0.0961837	1.74894e-06	TRUE	1.87484e-12
Excitatory_control_LINC02016	insomnia	0.0721725	3.05606e-06	TRUE	1.58679e-09
Excitatory_control_CCHCR1	insomnia	0.111419	7.35127e-08	TRUE	2.02775e-14
Excitatory_control_CCDC66	insomnia	0.0693839	7.52282e-06	TRUE	3.88528e-09
Oligodendrocytes_control_FNDC7	insomnia	0.0877299	1.52303e-06	TRUE	1.98931e-11
Excitatory_control_GRAMD1C	insomnia	0.104285	2.23275e-06	TRUE	1.93402e-13
Excitatory_control_OR7D2	insomnia	0.120773	1.45004e-06	TRUE	1.57607e-15
Excitatory_control_FAM120B	insomnia	0.0668937	9.06544e-07	TRUE	6.04283e-09
Oligodendrocytes_control_ITGB3BP	insomnia	0.109357	1.16522e-07	TRUE	3.72129e-14
Oligodendrocytes_control_PRKCA	insomnia	0.0938658	8.86988e-06	TRUE	4.66996e-12
Excitatory_control_GSAP	insomnia	0.0631419	1.68364e-06	TRUE	1.75636e-08
Astrocytes_control_GAD1	insomnia	0.060488	1.32452e-06	TRUE	3.54505e-08
Excitatory_control_MSH4	insomnia	0.0785836	4.46575e-08	TRUE	2.18619e-10
Inhibitory_control_NLRP2	insomnia	0.0997898	2.3971e-07	TRUE	5.90679e-13
Excitatory_control_GLB1L3	insomnia	0.0747954	4.79018e-06	TRUE	8.21352e-10
Inhibitory_control_DNAH5	insomnia	0.0783558	5.66799e-10	TRUE	2.26548e-10
Endothelial_control_UHMK1	insomnia	0.0604559	7.8769e-08	TRUE	3.20464e-08
Inhibitory_control_CCDC40	insomnia	0.0607783	4.71195e-06	TRUE	3.72215e-08
Oligodendrocytes_control_ABCC4	insomnia	0.164345	8.5137e-07	TRUE	2.93867e-21
Oligodendrocytes_control_CDH4	insomnia	0.0644944	3.65996e-06	TRUE	1.3165e-08
OPCs_control_CPQ	insomnia	0.153932	8.9462e-07	TRUE	7.37678e-20
Excitatory_control_C3orf20	insomnia	0.164816	2.52876e-08	TRUE	2.15905e-21
Astrocytes_control_DDX11	insomnia	0.130774	7.77301e-08	TRUE	7.0056e-17
Oligodendrocytes_control_CHRNA5	insomnia	0.0693723	4.76392e-06	TRUE	3.61712e-09
Oligodendrocytes_control_APOLD1	insomnia	0.0680997	2.5482e-06	TRUE	4.73344e-09
Excitatory_control_AIFM2	insomnia	0.132671	9.557e-06	TRUE	6.74862e-17
Oligodendrocytes_control_FBXO7	insomnia	0.101674	3.20906e-05	TRUE	7.98807e-13
Oligodendrocytes_control_ZNF347	insomnia	0.112157	2.47312e-05	TRUE	3.66009e-14
Astrocytes_control_PLD5	insomnia	0.1321	3.74093e-06	TRUE	6.43692e-17
Excitatory_control_CRYZ	insomnia	0.0658193	4.6651e-07	TRUE	7.82044e-09
OPCs_control_RPN1	insomnia	0.0830846	1.48314e-07	TRUE	6.41115e-11
Excitatory_control_GPAM	insomnia	0.0865537	4.73395e-08	TRUE	2.37166e-11
Inhibitory_control_PM20D1	insomnia	0.201519	1.88736e-06	TRUE	2.1796e-26
Excitatory_control_ZDHHC20	insomnia	0.0711111	9.09815e-07	TRUE	1.90462e-09
Astrocytes_control_CCBE1	insomnia	0.0854714	5.27142e-06	TRUE	4.37713e-11
Excitatory_control_DDX59	insomnia	0.0936273	2.47918e-06	TRUE	4.01034e-12
Excitatory_control_INTS10	insomnia	0.0766308	7.41224e-06	TRUE	5.34716e-10
Astrocytes_control_ANXA11	insomnia	0.107389	1.41291e-05	TRUE	1.1618e-13
Excitatory_control_NAPG	insomnia	0.13653	1.58696e-07	TRUE	1.28782e-17
Excitatory_control_NBPF3	insomnia	0.0731823	8.55016e-06	TRUE	1.4135e-09
Astrocytes_control_FRG1-DT	insomnia	0.0724796	8.82044e-07	TRUE	1.30524e-09
Astrocytes_control_MRPL23	insomnia	0.0638091	1.90661e-06	TRUE	1.48068e-08
Oligodendrocytes_control_FABP12	insomnia	0.0802925	1.70341e-08	TRUE	1.34337e-10
Oligodendrocytes_control_TRIM35	insomnia	0.10937	1.65372e-07	TRUE	3.75072e-14
Endothelial_control_DSC3	insomnia	0.0600144	3.1163e-07	TRUE	3.74339e-08
Excitatory_control_PACRG	insomnia	0.0945089	6.9946e-06	TRUE	3.70082e-12
Oligodendrocytes_control_SLC13A4	insomnia	0.0653974	6.64602e-06	TRUE	1.12282e-08
Inhibitory_control_ATG10	insomnia	0.0897741	5.81268e-06	TRUE	1.34355e-11
Excitatory_control_SEC22A	insomnia	0.0612607	7.05882e-06	TRUE	3.47357e-08
Excitatory_control_SLC39A8	insomnia	0.100449	1.31835e-06	TRUE	5.44406e-13
Excitatory_control_METTL27	insomnia	0.11461	2.13504e-06	TRUE	9.89609e-15
Excitatory_control_FTCD	insomnia	0.0760364	1.04185e-06	TRUE	4.95777e-10
Excitatory_control_RNASEL	insomnia	0.120742	3.3127e-06	TRUE	1.77466e-15
Excitatory_control_CCDC127	insomnia	0.0786393	1.14833e-05	TRUE	3.38429e-10
Astrocytes_control_PTER	insomnia	0.0764868	1.57962e-05	TRUE	6.62658e-10
Excitatory_control_NOB1	insomnia	0.0999079	1.17699e-07	TRUE	5.57396e-13
Endothelial_control_OLA1	insomnia	0.0615918	2.8598e-06	TRUE	2.81187e-08
OPCs_control_XRRA1	insomnia	0.184907	2.89068e-07	TRUE	4.02602e-24
Oligodendrocytes_control_CNTNAP3	insomnia	0.0624108	4.40283e-06	TRUE	2.37211e-08
Excitatory_control_SIGIRR	insomnia	0.0649257	2.01035e-08	TRUE	9.30327e-09
Oligodendrocytes_control_ZNF257	insomnia	0.086738	1.55036e-07	TRUE	2.31533e-11
Excitatory_control_DIMT1	insomnia	0.072148	2.34463e-06	TRUE	1.55042e-09
Inhibitory_control_PSMD13	insomnia	0.0598933	1.16893e-05	TRUE	5.51932e-08
Inhibitory_control_LINC00648	insomnia	0.0685636	4.84104e-07	TRUE	3.69828e-09
Oligodendrocytes_control_LLPH	insomnia	0.0598028	9.3326e-07	TRUE	4.17005e-08
Oligodendrocytes_control_ZSCAN31	insomnia	0.12512	4.0323e-06	TRUE	5.10333e-16
Oligodendrocytes_control_SLC9C2	insomnia	0.0621844	1.54293e-05	TRUE	3.17658e-08
Inhibitory_control_TSGA10	insomnia	0.0857883	4.43449e-06	TRUE	3.8956e-11
Excitatory_control_GLIPR1L2	insomnia	0.203478	8.5625e-09	TRUE	8.40838e-27
Pericytes_control_COL24A1	insomnia	0.0689772	3.45899e-06	TRUE	3.85814e-09
Inhibitory_control_OR2M3	insomnia	0.0706924	3.67727e-07	TRUE	2.03794e-09
Excitatory_control_D2HGDH	insomnia	0.0719346	4.02137e-06	TRUE	1.75405e-09
Excitatory_control_ZNF534	insomnia	0.0839261	7.89029e-07	TRUE	5.46005e-11
Oligodendrocytes_control_CR1	insomnia	0.0735907	1.66215e-08	TRUE	8.59497e-10
Oligodendrocytes_control_NPIPB13	insomnia	0.0908429	1.17716e-05	TRUE	1.16497e-11
Inhibitory_control_KLRC1	insomnia	0.0820946	8.14471e-06	TRUE	1.21039e-10
OPCs_control_COL19A1	insomnia	0.0791663	1.02577e-05	TRUE	2.85154e-10
Excitatory_control_MAP3K2-DT	insomnia	0.0884374	4.21519e-08	TRUE	1.39589e-11
Oligodendrocytes_control_CERS6	insomnia	0.143071	1.05436e-08	TRUE	1.70352e-18
Astrocytes_control_TPSD1	insomnia	0.0753239	5.10885e-08	TRUE	5.39894e-10
Oligodendrocytes_control_LRRIQ3	insomnia	0.0601006	9.06122e-06	TRUE	4.96133e-08
Oligodendrocytes_control_ADGRB3	insomnia	0.0648216	1.02568e-05	TRUE	1.42291e-08
Oligodendrocytes_control_TST	insomnia	0.0602387	2.1729e-06	TRUE	3.95064e-08
Oligodendrocytes_control_CCDC149	insomnia	0.069947	1.66398e-07	TRUE	2.435e-09
Excitatory_control_DSCC1	insomnia	0.179417	4.37541e-06	TRUE	3.29702e-23
Oligodendrocytes_control_CCDC146	insomnia	0.0671847	5.40584e-06	TRUE	6.68731e-09
Excitatory_control_CENPM	insomnia	0.115864	6.29063e-06	TRUE	8.25528e-15
Oligodendrocytes_control_CEP192	insomnia	0.0636309	7.94294e-06	TRUE	1.86892e-08
Excitatory_control_MUC6	insomnia	0.063969	6.42387e-06	TRUE	1.64419e-08
Excitatory_control_ST3GAL4	insomnia	0.0596623	1.84638e-05	TRUE	6.54805e-08
OPCs_control_NSUN2	insomnia	0.0996281	5.96343e-10	TRUE	5.73326e-13
Excitatory_control_MRGPRF	insomnia	0.124612	1.66027e-06	TRUE	5.20096e-16
Astrocytes_control_SPX	insomnia	0.0680915	2.8996e-06	TRUE	4.81117e-09
Inhibitory_control_TPPP2	insomnia	0.0726154	8.80809e-06	TRUE	1.65995e-09
Excitatory_control_SKAP2	insomnia	0.0698801	1.50284e-07	TRUE	2.47303e-09
OPCs_control_RSPO4	insomnia	0.0754286	2.70785e-06	TRUE	6.39984e-10
Excitatory_control_C9orf72	insomnia	0.147484	7.29902e-07	TRUE	5.18236e-19
Oligodendrocytes_control_OR2L5	insomnia	0.0767977	3.67727e-07	TRUE	3.78944e-10
Oligodendrocytes_control_ARNT	insomnia	0.0698536	1.37304e-05	TRUE	3.88829e-09
Excitatory_control_TNS2	insomnia	0.0616793	5.87821e-07	TRUE	2.44287e-08
Astrocytes_control_FAM118A	insomnia	0.196245	4.73056e-07	TRUE	1.04992e-25
Astrocytes_control_SPATA6L	insomnia	0.0821667	1.03299e-05	TRUE	1.25062e-10
Oligodendrocytes_control_ZDHHC21	insomnia	0.0805421	2.45766e-05	TRUE	2.51134e-10
Excitatory_control_SFXN4	insomnia	0.0778239	2.65916e-06	TRUE	3.30128e-10
Oligodendrocytes_control_CADM2	insomnia	0.0633668	1.61427e-05	TRUE	2.33855e-08
Astrocytes_control_DNAJC15	insomnia	0.078871	3.3625e-06	TRUE	2.54456e-10
Excitatory_control_TMPRSS11A	insomnia	0.0656704	2.15708e-06	TRUE	9.02495e-09
Oligodendrocytes_control_ADAMTS14	insomnia	0.0680997	1.50185e-07	TRUE	4.03156e-09
Astrocytes_control_NAPRT	insomnia	0.103689	4.83263e-07	TRUE	2.00824e-13
Oligodendrocytes_control_MAST4	insomnia	0.0676799	4.30375e-07	TRUE	4.68764e-09
Inhibitory_control_PLEC	insomnia	0.0597144	4.24253e-07	TRUE	4.10801e-08
Excitatory_control_ZNF623	insomnia	0.0691043	1.9517e-06	TRUE	3.5036e-09
Excitatory_control_PRPH2	insomnia	0.0970829	7.89561e-06	TRUE	1.84151e-12
Inhibitory_control_MED27	insomnia	0.069538	1.53373e-07	TRUE	2.71967e-09
Excitatory_control_CABCOCO1	insomnia	0.102534	1.94553e-06	TRUE	3.13235e-13
Oligodendrocytes_control_DNAH6	insomnia	0.149808	5.54161e-07	TRUE	2.49715e-19
Inhibitory_control_OR7D2	insomnia	0.0864943	1.45004e-06	TRUE	2.79632e-11
Oligodendrocytes_control_KLRC1	insomnia	0.0973932	6.32688e-06	TRUE	1.61036e-12
Inhibitory_control_NPIPB2	insomnia	0.178077	6.7991e-06	TRUE	5.65578e-23
Oligodendrocytes_control_HLA-DOB	insomnia	0.0808863	7.04779e-07	TRUE	1.26233e-10
Oligodendrocytes_control_ARHGEF3	insomnia	0.129149	2.94729e-07	TRUE	1.19072e-16
Pericytes_control_FAM209B	insomnia	0.0758008	6.44303e-08	TRUE	4.75047e-10
Excitatory_control_TPH1	insomnia	0.0660354	1.052e-05	TRUE	1.02981e-08
Oligodendrocytes_control_SFTA2	insomnia	0.0853398	4.42659e-08	TRUE	3.32703e-11
Excitatory_control_ZNF846	insomnia	0.0810442	7.77736e-07	TRUE	1.21565e-10
Excitatory_control_CHRNA5	insomnia	0.123614	4.33013e-06	TRUE	8.04065e-16
Excitatory_control_KLRC1	insomnia	0.128655	5.26309e-06	TRUE	1.90348e-16
OPCs_control_PM20D1	insomnia	0.0996841	1.74107e-06	TRUE	6.9568e-13
Excitatory_control_NARS2	insomnia	0.0826157	1.25115e-06	TRUE	8.13471e-11
Excitatory_control_OR2L5	insomnia	0.072453	3.67727e-07	TRUE	1.25605e-09
Excitatory_control_LATS1	insomnia	0.0670894	1.43073e-06	TRUE	5.91768e-09
Oligodendrocytes_control_CLHC1	insomnia	0.148048	4.51343e-06	TRUE	5.61618e-19
Inhibitory_control_GSTM3	insomnia	0.0660307	6.83741e-07	TRUE	7.52373e-09
Excitatory_control_TBC1D3D	insomnia	0.0830152	1.89131e-07	TRUE	6.58372e-11
Excitatory_control_MRPS18C	insomnia	0.0740577	8.83176e-06	TRUE	1.12002e-09
Microglia_control_MMP20	insomnia	0.0802273	2.14814e-07	TRUE	1.43539e-10
Excitatory_control_ITGA6	insomnia	0.0866263	3.53435e-06	TRUE	2.98254e-11
Excitatory_control_AGBL3	insomnia	0.0741653	3.73519e-06	TRUE	9.42197e-10
Excitatory_control_SPATA7	insomnia	0.177823	2.9458e-08	TRUE	3.58228e-23
Excitatory_control_EFCAB2	insomnia	0.0605421	8.02398e-06	TRUE	4.31006e-08
Oligodendrocytes_control_CCDC32	insomnia	0.135919	4.2691e-06	TRUE	2.12267e-17
Excitatory_control_CDC7	insomnia	0.111224	7.19248e-07	TRUE	2.36825e-14
Excitatory_control_SNX19	insomnia	0.0647538	6.71331e-08	TRUE	9.90311e-09
Oligodendrocytes_control_ASAP2	insomnia	0.162162	3.55214e-08	TRUE	4.96918e-21
Microglia_control_RNF150	insomnia	0.165947	5.38831e-07	TRUE	1.71645e-21
Inhibitory_control_KNOP1	insomnia	0.0724266	7.15684e-06	TRUE	1.67935e-09
Astrocytes_control_SAXO2	insomnia	0.0718888	5.52022e-08	TRUE	1.39417e-09
Inhibitory_control_ANKRD36	insomnia	0.117111	4.12047e-07	TRUE	4.15122e-15
OPCs_control_FBXO7	insomnia	0.153614	2.55023e-06	TRUE	9.27629e-20
Excitatory_control_KNOP1	insomnia	0.10119	9.09269e-06	TRUE	5.97392e-13
Astrocytes_control_STEAP2	insomnia	0.0848184	7.3603e-06	TRUE	5.58002e-11
Oligodendrocytes_control_SYT14	insomnia	0.141296	3.47265e-06	TRUE	4.09277e-18
Oligodendrocytes_control_PPFIA2	insomnia	0.0594938	1.46856e-05	TRUE	6.4646e-08
Microglia_control_CFAP45	insomnia	0.0623396	4.14492e-08	TRUE	1.90097e-08
Excitatory_control_LINC01060	insomnia	0.202081	1.03734e-07	TRUE	1.41088e-26
Oligodendrocytes_control_TMPRSS5	insomnia	0.187473	1.87344e-06	TRUE	2.12651e-24
Inhibitory_control_APIP	insomnia	0.155554	1.48864e-06	TRUE	4.7421e-20
Excitatory_control_GTF2H5	insomnia	0.0697242	2.64954e-05	TRUE	4.87841e-09
OPCs_control_FAM118A	insomnia	0.155282	5.07597e-07	TRUE	4.64454e-20
Inhibitory_control_ZP3	insomnia	0.0728732	4.02324e-06	TRUE	1.35652e-09
Oligodendrocytes_control_FAM171B	insomnia	0.163593	1.22034e-06	TRUE	3.85898e-21
OPCs_control_SPATA6L	insomnia	0.0678223	9.76959e-06	TRUE	6.24834e-09
Oligodendrocytes_control_ERGIC3	insomnia	0.0600909	6.39035e-07	TRUE	3.77887e-08
OPCs_control_OR2L13	insomnia	0.0609687	5.27794e-07	TRUE	2.94875e-08
OPCs_control_FBN2	insomnia	0.10078	5.89919e-07	TRUE	4.65928e-13
Excitatory_control_RAD51C	insomnia	0.130673	1.24936e-05	TRUE	1.32094e-16
Oligodendrocytes_control_STMP1	insomnia	0.0775736	6.64602e-06	TRUE	4.04331e-10
Excitatory_control_NAPRT	insomnia	0.103	1.51497e-07	TRUE	2.32498e-13
Excitatory_control_GAL3ST2	insomnia	0.0817535	6.0948e-08	TRUE	9.1039e-11
Endothelial_control_NR5A2	insomnia	0.0791181	4.33245e-08	TRUE	1.88315e-10
Inhibitory_control_RAB27A	insomnia	0.0965136	4.33165e-06	TRUE	1.92711e-12
Excitatory_control_MIR4422HG	insomnia	0.100893	2.01404e-07	TRUE	4.28488e-13
Oligodendrocytes_control_INPP1	insomnia	0.0609565	1.24265e-05	TRUE	4.20145e-08
Astrocytes_control_ERGIC3	insomnia	0.07561	4.71274e-06	TRUE	6.54989e-10
Oligodendrocytes_control_GREM1	insomnia	0.0688948	1.75324e-06	TRUE	3.67477e-09
Oligodendrocytes_control_ACYP2	insomnia	0.0612083	1.72305e-07	TRUE	2.65608e-08
Microglia_control_KCNMA1	insomnia	0.136076	2.15822e-06	TRUE	1.80905e-17
Excitatory_control_LINC02150	insomnia	0.157167	8.23498e-07	TRUE	2.71017e-20
Astrocytes_control_C17orf97	insomnia	0.0871229	7.20077e-07	TRUE	2.22382e-11
Pericytes_control_KANSL1	insomnia	0.133714	1.19435e-05	TRUE	5.31618e-17
Oligodendrocytes_control_FTCD	insomnia	0.0891652	1.15843e-06	TRUE	1.29964e-11
Excitatory_control_NEK1	insomnia	0.0631638	1.02961e-06	TRUE	1.68392e-08
Excitatory_control_FPR2	insomnia	0.116853	1.08718e-07	TRUE	4.23425e-15
Oligodendrocytes_control_ARHGAP42	insomnia	0.0855802	6.97099e-07	TRUE	3.416e-11
Excitatory_control_ACOT1	insomnia	0.0778806	4.20649e-06	TRUE	3.44855e-10
Oligodendrocytes_control_ABCA8	insomnia	0.0694306	8.32539e-07	TRUE	3.00215e-09
Excitatory_control_MCOLN3	insomnia	0.063969	2.92943e-06	TRUE	1.48e-08
Excitatory_control_ZNF273	insomnia	0.0606979	2.54495e-08	TRUE	2.95508e-08
Inhibitory_control_ITGB3BP	insomnia	0.142677	4.22236e-07	TRUE	2.13192e-18
Excitatory_control_B3GALT5	insomnia	0.0686011	6.72535e-06	TRUE	4.71299e-09
Astrocytes_control_DDX31	insomnia	0.0597319	1.09174e-05	TRUE	5.6867e-08
Excitatory_control_SCRN3	insomnia	0.0852128	2.90574e-07	TRUE	3.62077e-11
Oligodendrocytes_control_MGRN1	insomnia	0.0976076	2.96121e-06	TRUE	1.33608e-12
Oligodendrocytes_control_DBF4B	insomnia	0.0683729	4.38837e-06	TRUE	4.69387e-09
Microglia_control_TREML4	insomnia	0.159793	6.1278e-07	TRUE	1.17254e-20
Inhibitory_control_DDX11	insomnia	0.193787	1.17314e-07	TRUE	2.16621e-25
OPCs_control_APIP	insomnia	0.197686	1.48864e-06	TRUE	7.41994e-26
Excitatory_control_ANO7	insomnia	0.0704838	2.40336e-06	TRUE	2.45466e-09
Excitatory_control_AXDND1	insomnia	0.0623396	2.54219e-06	TRUE	2.26859e-08
Astrocytes_control_CYP4F3	insomnia	0.085867	1.18083e-06	TRUE	3.27425e-11
Excitatory_control_MIR3976HG	insomnia	0.073836	2.64964e-07	TRUE	8.4782e-10
Oligodendrocytes_control_RSPO4	insomnia	0.0702421	2.70785e-06	TRUE	2.65437e-09
Oligodendrocytes_control_JPH1	insomnia	0.109282	1.09988e-05	TRUE	6.28599e-14
Oligodendrocytes_control_TMEM50B	insomnia	0.0720279	1.82888e-06	TRUE	1.56356e-09
Inhibitory_control_WWOX	insomnia	0.0638353	2.08359e-06	TRUE	1.48223e-08
Excitatory_control_DRAM2	insomnia	0.0854359	2.10581e-07	TRUE	3.36182e-11
Excitatory_control_LRRIQ3	insomnia	0.123866	9.24826e-06	TRUE	8.87882e-16
Astrocytes_control_MIR4300HG	insomnia	0.0842704	2.80162e-06	TRUE	5.57209e-11
Excitatory_control_PRKRA	insomnia	0.0819889	3.35524e-06	TRUE	1.07405e-10
Excitatory_control_TDRD5	insomnia	0.11501	8.81588e-06	TRUE	1.14432e-14
Inhibitory_control_PWP2	insomnia	0.112734	7.16162e-06	TRUE	2.09636e-14
Excitatory_control_SLC9C2	insomnia	0.0693148	4.29154e-06	TRUE	3.62042e-09
Astrocytes_control_KLRC1	insomnia	0.0981064	8.63345e-06	TRUE	1.40879e-12
OPCs_control_DHCR7	insomnia	0.124577	3.46685e-06	TRUE	5.82997e-16
Oligodendrocytes_control_NIPA1	insomnia	0.0629922	1.37576e-06	TRUE	1.80026e-08
OPCs_control_CACNB2	insomnia	0.084264	2.10691e-05	TRUE	8.57458e-11
Microglia_control_USP53	insomnia	0.129416	6.16083e-08	TRUE	1.04154e-16
Excitatory_control_DYTN	insomnia	0.0604453	3.67729e-06	TRUE	3.94576e-08
Excitatory_control_DHFR2	insomnia	0.103933	5.32075e-08	TRUE	1.73473e-13
Excitatory_control_LINC02508	insomnia	0.0813818	1.46425e-07	TRUE	1.02926e-10
Excitatory_control_PHACTR4	insomnia	0.151288	2.47606e-06	TRUE	1.8796e-19
Oligodendrocytes_control_FAM135B	insomnia	0.114804	8.5529e-09	TRUE	7.37271e-15
Excitatory_control_TDRKH	insomnia	0.0602287	3.158e-06	TRUE	4.11112e-08
Excitatory_control_SLC25A24	insomnia	0.0935538	9.46259e-06	TRUE	5.17101e-12
Inhibitory_control_CCDC163	insomnia	0.162205	5.35693e-07	TRUE	5.49193e-21
Oligodendrocytes_control_SPATA7	insomnia	0.0848636	1.28325e-07	TRUE	3.88594e-11
Excitatory_control_PCDHB7	insomnia	0.0836874	3.25878e-07	TRUE	5.56778e-11
Excitatory_control_ZNF34	insomnia	0.0965685	2.78438e-06	TRUE	1.77694e-12
Excitatory_control_PSMB5	insomnia	0.0865298	1.0402e-05	TRUE	3.74593e-11
Excitatory_control_RAB27A	insomnia	0.103328	4.33165e-06	TRUE	2.79738e-13
OPCs_control_CR1	insomnia	0.0789771	1.66215e-08	TRUE	1.93548e-10
Endothelial_control_ARL5C	insomnia	0.0689152	3.32387e-06	TRUE	3.90628e-09
Excitatory_control_C2orf80	insomnia	0.0592084	1.52434e-07	TRUE	4.5609e-08
Microglia_control_SLC18A1	insomnia	0.0882808	4.75115e-06	TRUE	1.96745e-11
Microglia_control_PWP2	insomnia	0.183987	1.095e-05	TRUE	1.00715e-23
Oligodendrocytes_control_PDE1A	insomnia	0.138085	1.43685e-06	TRUE	9.42385e-18
Excitatory_control_KANSL1	insomnia	0.186323	1.16507e-05	TRUE	4.89566e-24
Excitatory_control_NPIPB12	insomnia	0.070029	1.63724e-07	TRUE	2.38189e-09
OPCs_control_CYP4F11	insomnia	0.137402	1.09804e-06	TRUE	1.12339e-17
OPCs_control_OR2L3	insomnia	0.0778239	3.67727e-07	TRUE	2.85289e-10
Excitatory_control_ZNF566	insomnia	0.0904349	4.49707e-06	TRUE	1.06829e-11
Oligodendrocytes_control_U2AF1	insomnia	0.175643	1.5692e-06	TRUE	9.08507e-23
Astrocytes_control_ZSCAN31	insomnia	0.0765661	7.548e-09	TRUE	3.75393e-10
Endothelial_control_ZNF732	insomnia	0.0692247	7.08818e-07	TRUE	3.14684e-09
Endothelial_control_U2AF1	insomnia	0.0633437	1.5692e-06	TRUE	1.65339e-08
Astrocytes_control_GSTT2B	insomnia	0.0609202	4.29543e-06	TRUE	3.53818e-08
Excitatory_control_DIS3L	insomnia	0.0891897	2.99269e-08	TRUE	1.12442e-11
Oligodendrocytes_control_DHCR24	insomnia	0.0609932	1.57554e-06	TRUE	3.13056e-08
OPCs_control_ANKRD36	insomnia	0.0804494	3.32023e-07	TRUE	1.37273e-10
OPCs_control_SFMBT2	insomnia	0.0608368	6.30406e-06	TRUE	3.8232e-08
Oligodendrocytes_control_TSPAN11	insomnia	0.147454	1.8583e-08	TRUE	4.53532e-19
Inhibitory_control_TOGARAM2	insomnia	0.175495	1.95895e-06	TRUE	9.82817e-23
Excitatory_control_MTCH2	insomnia	0.0604559	5.45892e-05	TRUE	7.7389e-08
Oligodendrocytes_control_CSGALNACT2	insomnia	0.103364	4.09504e-06	TRUE	2.7415e-13
Excitatory_control_GPR83	insomnia	0.0600144	1.82802e-06	TRUE	4.13227e-08
Oligodendrocytes_control_HFM1	insomnia	0.156738	4.34627e-07	TRUE	2.93497e-20
Inhibitory_control_KIF6	insomnia	0.124309	1.40436e-06	TRUE	5.57788e-16
Excitatory_control_HCG27	insomnia	0.0665633	6.1443e-06	TRUE	8.07771e-09
Excitatory_control_MGAM	insomnia	0.0890217	8.91138e-06	TRUE	1.80771e-11
Oligodendrocytes_control_DNA2	insomnia	0.105523	1.97602e-05	TRUE	2.21093e-13
Oligodendrocytes_control_STX6	insomnia	0.147902	1.50092e-06	TRUE	4.91256e-19
Inhibitory_control_MYRFL	insomnia	0.0856545	3.98958e-09	TRUE	2.98048e-11
Excitatory_control_SCART1	insomnia	0.105771	2.69119e-06	TRUE	1.29592e-13
Oligodendrocytes_control_CDH23	insomnia	0.062134	3.65893e-07	TRUE	2.11471e-08
Pericytes_control_CTSB	insomnia	0.0681914	2.26241e-06	TRUE	4.56151e-09
Excitatory_control_ADAL	insomnia	0.122234	1.67425e-05	TRUE	1.7234e-15
Excitatory_control_ZNF667	insomnia	0.0678529	3.34663e-06	TRUE	5.22298e-09
Inhibitory_control_ZSCAN31	insomnia	0.111441	3.38847e-06	TRUE	2.63571e-14
Excitatory_control_FAM227A	insomnia	0.0637573	3.31266e-07	TRUE	1.35382e-08
Excitatory_control_OTUD3	insomnia	0.0593012	2.19134e-07	TRUE	4.49078e-08
Endothelial_control_AADAC	insomnia	0.0644944	5.60859e-07	TRUE	1.13263e-08
Oligodendrocytes_control_PM20D1	insomnia	0.11703	1.88736e-06	TRUE	4.83127e-15
Astrocytes_control_SPATA22	insomnia	0.0651616	1.74593e-08	TRUE	8.71021e-09
Excitatory_control_ATG10	insomnia	0.174039	6.05645e-06	TRUE	1.96101e-22
Excitatory_control_CLHC1	insomnia	0.182324	4.51343e-06	TRUE	1.31493e-23
Inhibitory_control_PCM1	insomnia	0.114299	1.33659e-07	TRUE	8.95069e-15
Excitatory_control_KLRD1	insomnia	0.0793318	9.71496e-07	TRUE	1.98401e-10
Excitatory_control_LONP1	insomnia	0.0884175	1.48512e-06	TRUE	1.63792e-11
Excitatory_control_PPFIA1	insomnia	0.107139	7.58863e-06	TRUE	1.05518e-13
Inhibitory_control_CTSS	insomnia	0.0621174	1.10158e-06	TRUE	2.24789e-08
Astrocytes_control_DNAJC6	insomnia	0.0894703	8.24091e-06	TRUE	1.56895e-11
Oligodendrocytes_control_LSS	insomnia	0.0696736	8.61687e-07	TRUE	2.81501e-09
Oligodendrocytes_control_LINC01060	insomnia	0.135875	1.46425e-07	TRUE	1.56165e-17
Oligodendrocytes_control_TBC1D3D	insomnia	0.0815322	1.89131e-07	TRUE	9.9491e-11
Excitatory_control_NRG4	insomnia	0.198659	6.77437e-08	TRUE	4.30063e-26
Excitatory_control_GPR39	insomnia	0.0740252	2.94345e-06	TRUE	9.50409e-10
OPCs_control_BOC	insomnia	0.0618764	1.6884e-06	TRUE	2.47746e-08
Excitatory_control_MRLN	insomnia	0.0853919	1.2774e-05	TRUE	5.40726e-11
Astrocytes_control_ROGDI	insomnia	0.106189	6.37161e-06	TRUE	1.3323e-13
Inhibitory_control_CRYBG1	insomnia	0.0732802	4.67243e-07	TRUE	1.01134e-09
Inhibitory_control_PCOLCE2	insomnia	0.0841004	5.28209e-06	TRUE	6.4067e-11
Endothelial_control_LINC00336	insomnia	0.0643711	1.59947e-06	TRUE	1.25234e-08
Inhibitory_control_TRIM5	insomnia	0.0613678	1.35454e-06	TRUE	2.79565e-08
Inhibitory_control_GAS8	insomnia	0.122672	5.27188e-07	TRUE	8.29786e-16
Excitatory_control_CHPT1	insomnia	0.0800587	1.34954e-06	TRUE	1.66406e-10
Excitatory_control_DBF4B	insomnia	0.0760995	1.63296e-07	TRUE	4.46814e-10
Inhibitory_control_CYB561	insomnia	0.157589	3.4865e-06	TRUE	2.89578e-20
Excitatory_control_CCAR2	insomnia	0.0620516	1.25452e-05	TRUE	3.13595e-08
Astrocytes_control_WFIKKN1	insomnia	0.0619869	7.73232e-06	TRUE	2.89929e-08
Microglia_control_MAPK1	insomnia	0.0686011	1.25705e-06	TRUE	3.87753e-09
Excitatory_control_ZNF552	insomnia	0.0692808	1.04918e-07	TRUE	2.89082e-09
Excitatory_control_CERS5	insomnia	0.171619	2.67671e-06	TRUE	3.51328e-22
OPCs_control_HLA-DOB	insomnia	0.0794347	7.04779e-07	TRUE	1.88805e-10
OPCs_control_KANSL1	insomnia	0.21487	1.16507e-05	TRUE	4.19905e-28
Excitatory_control_PIGP	insomnia	0.0601395	3.29242e-08	TRUE	3.44964e-08
Excitatory_control_MIR4713HG	insomnia	0.0749685	3.42543e-06	TRUE	7.47123e-10
Microglia_control_XRRA1	insomnia	0.105354	1.6249e-07	TRUE	1.18819e-13
Oligodendrocytes_control_LDHC	insomnia	0.193955	1.75073e-08	TRUE	1.95178e-25
Excitatory_control_CENPP	insomnia	0.209259	9.5205e-07	TRUE	1.51654e-27
Excitatory_control_ZP3	insomnia	0.107664	8.49142e-06	TRUE	9.32665e-14
Oligodendrocytes_control_WFIKKN1	insomnia	0.0825423	8.06939e-06	TRUE	1.06776e-10
Excitatory_control_PCM1	insomnia	0.0882808	2.72814e-06	TRUE	1.81665e-11
Oligodendrocytes_control_ADGRE2	insomnia	0.0608368	1.24799e-05	TRUE	4.34314e-08
Excitatory_control_TIMM44	insomnia	0.0633437	8.65322e-07	TRUE	1.58602e-08
Excitatory_control_CYP4F3	insomnia	0.0749738	1.5217e-06	TRUE	6.847e-10
Oligodendrocytes_control_HLF	insomnia	0.0788117	1.11056e-06	TRUE	2.31424e-10
Oligodendrocytes_control_KCNMB4	insomnia	0.0595856	7.45358e-06	TRUE	5.50578e-08
Excitatory_control_DPH1	insomnia	0.103782	9.87291e-06	TRUE	2.9248e-13
Endothelial_control_BACE2	insomnia	0.102095	2.11195e-07	TRUE	3.0477e-13
Oligodendrocytes_control_PCM1	insomnia	0.0894703	2.72814e-06	TRUE	1.30271e-11
Oligodendrocytes_control_D2HGDH	insomnia	0.0671209	3.3232e-06	TRUE	6.36898e-09
Astrocytes_control_DPY19L2	insomnia	0.059628	3.73093e-07	TRUE	4.183e-08
Astrocytes_control_BEST1	insomnia	0.0603509	8.31189e-06	TRUE	4.56525e-08
Excitatory_control_SPATA1	insomnia	0.102241	2.41425e-06	TRUE	3.49559e-13
Endothelial_control_RBM20	insomnia	0.0771843	2.89636e-06	TRUE	3.97951e-10
OPCs_control_SNX19	insomnia	0.117266	2.25137e-06	TRUE	4.61279e-15
Astrocytes_control_RPIA	insomnia	0.0804494	5.75296e-06	TRUE	1.7852e-10
Excitatory_control_FUT10	insomnia	0.0703459	9.01377e-06	TRUE	3.0958e-09
Astrocytes_control_NSUN2	insomnia	0.114664	1.81244e-09	TRUE	7.60976e-15
Excitatory_control_SLC7A9	insomnia	0.205476	2.16905e-07	TRUE	4.73593e-27
Astrocytes_control_SAAL1	insomnia	0.0863215	5.10509e-06	TRUE	3.43673e-11
Excitatory_control_ZNF880	insomnia	0.0810984	5.0354e-07	TRUE	1.16788e-10
Excitatory_control_POLD3	insomnia	0.0749477	3.25719e-06	TRUE	7.46724e-10
Microglia_control_CHST13	insomnia	0.0802925	5.5817e-06	TRUE	1.85459e-10
OPCs_control_DEFB134	insomnia	0.0609444	1.79806e-06	TRUE	3.20842e-08
Astrocytes_control_NPIPA5	insomnia	0.0820946	2.83268e-06	TRUE	1.02069e-10
Excitatory_control_SRA1	insomnia	0.113501	6.58357e-08	TRUE	1.10695e-14
Inhibitory_control_GSTM5	insomnia	0.0599302	9.84767e-07	TRUE	4.04227e-08
Astrocytes_control_LINC00299	insomnia	0.0746923	2.41778e-06	TRUE	7.73503e-10
Astrocytes_control_TBC1D3D	insomnia	0.0669176	1.89131e-07	TRUE	5.6072e-09
Oligodendrocytes_control_C17orf100	insomnia	0.142162	2.14931e-06	TRUE	2.92039e-18
Inhibitory_control_GAL3ST2	insomnia	0.0824903	4.02137e-06	TRUE	9.59069e-11
Excitatory_control_POLQ	insomnia	0.11691	1.38377e-06	TRUE	4.83351e-15
Oligodendrocytes_control_STX19	insomnia	0.0911861	1.10594e-06	TRUE	7.34435e-12
Excitatory_control_ZNF266	insomnia	0.150112	7.43629e-07	TRUE	2.33397e-19
Oligodendrocytes_control_CKAP4	insomnia	0.166095	3.08357e-07	TRUE	1.57544e-21
Oligodendrocytes_control_AMPD3	insomnia	0.132509	2.42813e-06	TRUE	5.31671e-17
Astrocytes_control_LINS1	insomnia	0.121366	4.67815e-07	TRUE	1.20751e-15
Excitatory_control_WDR88	insomnia	0.0599302	4.81113e-07	TRUE	3.89348e-08
Excitatory_control_CLEC19A	insomnia	0.0687255	1.57359e-07	TRUE	3.40077e-09
Excitatory_control_YIPF7	insomnia	0.106517	1.89152e-06	TRUE	1.00164e-13
Excitatory_control_XYLT2	insomnia	0.115496	2.57992e-06	TRUE	7.84961e-15
Oligodendrocytes_control_SNAP91	insomnia	0.0784612	3.18539e-06	TRUE	2.82974e-10
Excitatory_control_LINC01649	insomnia	0.068545	1.80592e-07	TRUE	3.58615e-09
Excitatory_control_XKR9	insomnia	0.123261	8.02758e-06	TRUE	1.02071e-15
Microglia_control_BARX2	insomnia	0.0611953	3.51671e-07	TRUE	2.72694e-08
Excitatory_control_LINC01117	insomnia	0.0691805	9.38894e-06	TRUE	4.2875e-09
Astrocytes_control_CES1	insomnia	0.0608368	6.77303e-07	TRUE	3.09474e-08
Excitatory_control_LINC02145	insomnia	0.0793149	1.01981e-05	TRUE	2.7344e-10
Excitatory_control_CFAP300	insomnia	0.065993	8.7648e-07	TRUE	7.70947e-09
Inhibitory_control_RGPD8	insomnia	0.0707758	2.39977e-07	TRUE	1.96098e-09
Excitatory_control_ECHDC2	insomnia	0.0611182	1.1458e-09	TRUE	2.5938e-08
Oligodendrocytes_control_OR2L3	insomnia	0.0706759	3.67727e-07	TRUE	2.04717e-09
Excitatory_control_LINC01273	insomnia	0.068658	2.08759e-06	TRUE	3.98297e-09
Inhibitory_control_ITPR2	insomnia	0.122189	1.54914e-06	TRUE	1.0494e-15
Astrocytes_control_PWP2	insomnia	0.180719	1.095e-05	TRUE	2.85323e-23
Inhibitory_control_CLUL1	insomnia	0.0770631	1.43927e-06	TRUE	3.83304e-10
Inhibitory_control_HLA-B	insomnia	0.0808098	5.6864e-06	TRUE	1.6126e-10
OPCs_control_LINC01324	insomnia	0.0677094	1.90342e-06	TRUE	5.11902e-09
Astrocytes_control_SPATA20	insomnia	0.0677843	2.20498e-07	TRUE	4.44251e-09
OPCs_control_GLIPR1L2	insomnia	0.15657	1.08771e-07	TRUE	2.88979e-20
OPCs_control_ZNF100	insomnia	0.081594	6.42581e-06	TRUE	1.32708e-10
Excitatory_control_HLA-DOB	insomnia	0.177735	7.04779e-07	TRUE	4.26859e-23
Oligodendrocytes_control_CAMK2N1	insomnia	0.147545	4.75951e-07	TRUE	4.91932e-19
Oligodendrocytes_control_OXR1	insomnia	0.118601	1.80732e-07	TRUE	2.58797e-15
Excitatory_control_ARHGEF39	insomnia	0.0738284	4.48726e-06	TRUE	1.06046e-09
Excitatory_control_OR2T10	insomnia	0.0862216	1.00282e-05	TRUE	4.04496e-11
OPCs_control_LRRC37A2	insomnia	0.0883193	6.90735e-06	TRUE	2.08275e-11
Oligodendrocytes_control_CLEC2A	insomnia	0.0693148	1.33366e-08	TRUE	2.78424e-09
Excitatory_control_SLX1B	insomnia	0.0631858	1.52479e-05	TRUE	2.41912e-08
Inhibitory_control_INPP1	insomnia	0.110155	1.14966e-05	TRUE	4.95954e-14
Microglia_control_LINC02234	insomnia	0.0873687	4.61952e-06	TRUE	2.52586e-11
Microglia_control_U2AF1	insomnia	0.10311	1.5692e-06	TRUE	2.5979e-13
Oligodendrocytes_control_ADAMTS5	insomnia	0.119986	1.69192e-05	TRUE	3.32181e-15
OPCs_control_LINC02613	insomnia	0.064961	1.05881e-06	TRUE	1.03401e-08
Excitatory_control_OR2M3	insomnia	0.0839496	3.67727e-07	TRUE	5.20253e-11
Astrocytes_control_APOLD1	insomnia	0.106815	5.63225e-07	TRUE	8.28309e-14
Oligodendrocytes_control_AGT	insomnia	0.0618608	4.37382e-06	TRUE	2.74996e-08
Excitatory_control_SEC23B	insomnia	0.0604347	1.70539e-05	TRUE	5.21061e-08
Oligodendrocytes_control_EPB41L4A	insomnia	0.069538	3.93753e-06	TRUE	3.36717e-09
Excitatory_control_DNALI1	insomnia	0.126854	4.28818e-08	TRUE	2.20575e-16
Excitatory_control_XRRA1	insomnia	0.271068	1.23254e-07	TRUE	4.44174e-37
Oligodendrocytes_control_TMC2	insomnia	0.0902664	1.00397e-07	TRUE	8.49416e-12
OPCs_control_MAP4K4	insomnia	0.0600144	6.5172e-06	TRUE	4.79918e-08
Excitatory_control_CCDC125	insomnia	0.115102	6.5958e-07	TRUE	7.66188e-15
OPCs_control_C17orf97	insomnia	0.0712046	9.08256e-07	TRUE	1.85601e-09
Oligodendrocytes_control_LHFPL6	insomnia	0.14231	1.82477e-05	TRUE	4.81347e-18
OPCs_control_PLD5	insomnia	0.0723744	3.50248e-06	TRUE	1.52655e-09
Oligodendrocytes_control_MASTL	insomnia	0.0611565	1.47546e-05	TRUE	4.14157e-08
OPCs_control_CRISPLD1	insomnia	0.0670025	2.94927e-06	TRUE	6.48656e-09
Oligodendrocytes_control_LINC00665	insomnia	0.0601888	6.52097e-08	TRUE	3.43577e-08
OPCs_control_APOLD1	insomnia	0.0698536	1.60634e-07	TRUE	2.49548e-09
Pericytes_control_PEX26	insomnia	0.0844623	1.02171e-06	TRUE	4.78905e-11
Inhibitory_control_TMCO3	insomnia	0.0716679	1.05133e-05	TRUE	2.23106e-09
Excitatory_control_MYRFL	insomnia	0.0780562	7.37864e-08	TRUE	2.55074e-10
Oligodendrocytes_control_MPPE1	insomnia	0.0944258	3.13368e-06	TRUE	3.30224e-12
Excitatory_control_PADI4	insomnia	0.200464	1.47526e-05	TRUE	5.5117e-26
Endothelial_control_HLA-DQB1	insomnia	0.098819	6.11932e-06	TRUE	1.06995e-12
Oligodendrocytes_control_TMEM232	insomnia	0.0719346	1.30577e-06	TRUE	1.55886e-09
Excitatory_control_TAF1B	insomnia	0.0604136	2.0997e-06	TRUE	3.75336e-08
OPCs_control_C2orf74	insomnia	0.0592468	1.03615e-06	TRUE	4.88013e-08
Astrocytes_control_RIMS1	insomnia	0.0940833	2.49275e-06	TRUE	3.53043e-12
Inhibitory_control_NEK1	insomnia	0.0606415	1.02961e-06	TRUE	3.34181e-08
Excitatory_control_MYOM2	insomnia	0.0804723	4.34903e-06	TRUE	1.69552e-10
Excitatory_control_MAPK12	insomnia	0.0767385	2.45679e-05	TRUE	7.09638e-10
Excitatory_control_CAMLG	insomnia	0.121645	3.8268e-05	TRUE	2.96434e-15
OPCs_control_U2AF1	insomnia	0.176981	1.08587e-06	TRUE	5.67337e-23
Oligodendrocytes_control_EXOSC6	insomnia	0.113922	5.46157e-06	TRUE	1.40398e-14
Excitatory_control_ARL17A	insomnia	0.079505	1.45299e-05	TRUE	2.8337e-10
Inhibitory_control_RNASEH2B	insomnia	0.101385	1.30489e-06	TRUE	4.16822e-13
Excitatory_control_SCAPER	insomnia	0.0822665	1.55359e-07	TRUE	8.06025e-11
Oligodendrocytes_control_RABEP1	insomnia	0.0597939	7.10146e-06	TRUE	5.16291e-08
Inhibitory_control_TRIM69	insomnia	0.0887288	3.14595e-06	TRUE	1.63291e-11
Oligodendrocytes_control_AGTR1	insomnia	0.0601888	6.60142e-07	TRUE	3.68389e-08
Inhibitory_control_FAM118A	insomnia	0.177735	8.60197e-07	TRUE	4.35319e-23
Excitatory_control_APIP	insomnia	0.221486	1.39264e-06	TRUE	2.5717e-29
Inhibitory_control_BICC1	insomnia	0.11953	1.02135e-05	TRUE	3.22298e-15
OPCs_control_LINC01374	insomnia	0.0706924	1.37775e-05	TRUE	3.09945e-09
Excitatory_control_DSC1	insomnia	0.132093	3.40388e-06	TRUE	6.34504e-17
Inhibitory_control_ALG6	insomnia	0.0614088	4.14297e-06	TRUE	3.08659e-08
Inhibitory_control_OPN5	insomnia	0.0769815	1.18085e-07	TRUE	3.47025e-10
Astrocytes_control_PM20D1	insomnia	0.10052	1.88736e-06	TRUE	5.53566e-13
Excitatory_control_GREB1	insomnia	0.0984919	1.33354e-05	TRUE	1.41587e-12
Astrocytes_control_LONP1	insomnia	0.0774392	1.08713e-06	TRUE	3.37817e-10
Excitatory_control_LINC01941	insomnia	0.0622354	5.93186e-07	TRUE	2.10169e-08
Oligodendrocytes_control_PSORS1C1	insomnia	0.130082	1.04929e-07	TRUE	8.6693e-17
Excitatory_control_GNMT	insomnia	0.10244	1.76679e-08	TRUE	2.61608e-13
Excitatory_control_PRSS55	insomnia	0.163903	1.95366e-05	TRUE	7.02618e-21
Excitatory_control_C17orf97	insomnia	0.0796497	9.08256e-07	TRUE	1.80823e-10
Excitatory_control_VAMP8	insomnia	0.0672959	2.57225e-06	TRUE	5.90277e-09
Excitatory_control_ANKRD65	insomnia	0.0841127	1.5393e-07	TRUE	4.81717e-11
Inhibitory_control_DYNC1I2	insomnia	0.0621174	4.18694e-07	TRUE	2.13618e-08
Oligodendrocytes_control_DDX25	insomnia	0.107862	7.08606e-07	TRUE	6.22579e-14
Excitatory_control_SMC2	insomnia	0.0780204	5.76895e-06	TRUE	3.48804e-10
Inhibitory_control_LINC00964	insomnia	0.0932218	2.56951e-06	TRUE	4.51569e-12
Excitatory_control_CYB561	insomnia	0.263825	3.57804e-06	TRUE	9.89504e-36
Oligodendrocytes_control_PPFIBP2	insomnia	0.0708097	1.36016e-06	TRUE	2.12944e-09
Inhibitory_control_PRPH2	insomnia	0.0890452	7.55574e-06	TRUE	1.73309e-11
Inhibitory_control_CCDC32	insomnia	0.139068	2.06975e-05	TRUE	1.33429e-17
Inhibitory_control_OR2L2	insomnia	0.0603821	3.67727e-07	TRUE	3.40617e-08
Oligodendrocytes_control_RGPD8	insomnia	0.116296	5.48544e-07	TRUE	5.35077e-15
Excitatory_control_YBX3	insomnia	0.0760925	1.555e-06	TRUE	5.04104e-10
Excitatory_control_LDHC	insomnia	0.277127	1.13301e-08	TRUE	4.29733e-38
OPCs_control_PWP2	insomnia	0.109215	9.51032e-06	TRUE	6.16597e-14
Excitatory_control_LEKR1	insomnia	0.103702	4.05911e-07	TRUE	1.98188e-13
Endothelial_control_LINC01606	insomnia	0.0632303	4.89111e-06	TRUE	1.92731e-08
Excitatory_control_CFAP46	insomnia	0.0659512	1.84099e-06	TRUE	8.23955e-09
Excitatory_control_LRRC69	insomnia	0.0656448	1.20814e-05	TRUE	1.17966e-08
Astrocytes_control_LINC00334	insomnia	0.0683027	6.07481e-06	TRUE	5.02844e-09
OPCs_control_PPM1K-DT	insomnia	0.145012	9.04733e-06	TRUE	1.67419e-18
Inhibitory_control_EFCAB7	insomnia	0.063208	4.22236e-07	TRUE	1.58769e-08
Excitatory_control_CAPS	insomnia	0.082956	2.05218e-06	TRUE	7.74809e-11
Astrocytes_control_RNASEH2B	insomnia	0.0920029	1.13095e-06	TRUE	5.84862e-12
Excitatory_control_MTHFSD	insomnia	0.0735194	6.7557e-08	TRUE	8.92626e-10
Microglia_control_DST	insomnia	0.0645258	2.3781e-06	TRUE	1.24423e-08
Astrocytes_control_TPM2	insomnia	0.100088	3.28638e-06	TRUE	6.71804e-13
Excitatory_control_SHTN1	insomnia	0.0689255	3.44458e-08	TRUE	3.12856e-09
Inhibitory_control_SIGIRR	insomnia	0.0602893	1.18856e-05	TRUE	4.97883e-08
OPCs_control_EFHB	insomnia	0.10478	1.37009e-05	TRUE	2.41499e-13
Inhibitory_control_RNF39	insomnia	0.106377	3.31742e-06	TRUE	1.12278e-13
OPCs_control_ATG10	insomnia	0.0691259	5.59352e-06	TRUE	3.96313e-09
Excitatory_control_DISC1	insomnia	0.0840881	2.18204e-06	TRUE	5.6939e-11
Excitatory_control_GSTM2	insomnia	0.0632527	2.77375e-06	TRUE	1.78698e-08
Astrocytes_control_ABLIM3	insomnia	0.128697	1.22548e-05	TRUE	2.34701e-16
Oligodendrocytes_control_PI16	insomnia	0.109692	1.36025e-06	TRUE	3.88869e-14
Excitatory_control_BSPRY	insomnia	0.103022	8.08055e-06	TRUE	3.45526e-13
Oligodendrocytes_control_ACER3	insomnia	0.0942653	6.35704e-07	TRUE	2.96626e-12
Excitatory_control_IGSF8	insomnia	0.0624287	1.73369e-06	TRUE	2.13727e-08
Excitatory_control_MSH3	insomnia	0.0661508	9.27254e-06	TRUE	9.72679e-09
Excitatory_control_PHLDB3	insomnia	0.0909366	4.16003e-07	TRUE	7.39912e-12
Oligodendrocytes_control_CHPT1	insomnia	0.107039	3.62286e-07	TRUE	7.57538e-14
Excitatory_control_RPIA	insomnia	0.109326	2.96965e-06	TRUE	4.74606e-14
Excitatory_control_RBM11	insomnia	0.062375	5.92106e-07	TRUE	2.02252e-08
Astrocytes_control_CBS	insomnia	0.0668464	4.00965e-06	TRUE	7.02713e-09
Oligodendrocytes_control_FAM118A	insomnia	0.145646	6.86647e-07	TRUE	8.99853e-19
Excitatory_control_SNX8	insomnia	0.170799	1.5476e-06	TRUE	4.17821e-22
Inhibitory_control_SLC22A31	insomnia	0.0613543	3.07799e-06	TRUE	3.02277e-08
OPCs_control_LRMDA	insomnia	0.0696486	7.77082e-08	TRUE	2.59697e-09
Excitatory_control_HLA-F	insomnia	0.069538	2.06756e-05	TRUE	4.73723e-09
Excitatory_control_COQ5	insomnia	0.068545	8.35817e-06	TRUE	4.97799e-09
Inhibitory_control_LINC00443	insomnia	0.0819201	3.87437e-07	TRUE	9.179e-11
Excitatory_control_SMUG1	insomnia	0.115938	5.63895e-07	TRUE	5.94762e-15
Excitatory_control_TRPV3	insomnia	0.0675356	5.44198e-07	TRUE	4.92727e-09
Astrocytes_control_STMP1	insomnia	0.0665307	6.64602e-06	TRUE	8.25599e-09
Inhibitory_control_AKR1C2	insomnia	0.060005	2.53662e-07	TRUE	3.72561e-08
Astrocytes_control_LINC02021	insomnia	0.0697242	2.65513e-06	TRUE	3.05193e-09
Inhibitory_control_SOHLH2	insomnia	0.0804494	1.04348e-06	TRUE	1.46325e-10
Oligodendrocytes_control_LINC01291	insomnia	0.125659	2.01226e-05	TRUE	6.82884e-16
Inhibitory_control_NMRK1	insomnia	0.103822	2.82448e-06	TRUE	2.27407e-13
Inhibitory_control_LY6G5C	insomnia	0.0657485	1.48891e-07	TRUE	7.66882e-09
Excitatory_control_LINC01374	insomnia	0.0941304	1.05555e-05	TRUE	4.52137e-12
Excitatory_control_MGMT	insomnia	0.0736268	1.55288e-07	TRUE	8.83667e-10
Inhibitory_control_SLC25A24	insomnia	0.0792316	1.21631e-05	TRUE	2.9169e-10
Endothelial_control_GALNT17	insomnia	0.110332	1.41058e-07	TRUE	2.82558e-14
Microglia_control_ART5	insomnia	0.0733809	1.25905e-07	TRUE	9.39637e-10
Oligodendrocytes_control_MPPED1	insomnia	0.0849093	3.08586e-06	TRUE	4.72301e-11
Excitatory_control_LINC00290	insomnia	0.123083	4.6226e-06	TRUE	9.51162e-16
Excitatory_control_MRPL19	insomnia	0.0921266	3.14842e-06	TRUE	6.30603e-12
Excitatory_control_ZSCAN18	insomnia	0.0791341	1.53175e-06	TRUE	2.17332e-10
Oligodendrocytes_control_CPM	insomnia	0.0690614	1.5691e-06	TRUE	3.47656e-09
Excitatory_control_HLA-DOA	insomnia	0.0634607	2.80697e-06	TRUE	1.69041e-08
Inhibitory_control_LINC02175	insomnia	0.0753527	3.21219e-06	TRUE	6.66796e-10
Microglia_control_GNLY	insomnia	0.0995062	2.86676e-06	TRUE	7.76998e-13
Excitatory_control_LINC01068	insomnia	0.0890217	6.70854e-06	TRUE	1.70276e-11
Oligodendrocytes_control_MCF2L	insomnia	0.109783	5.8748e-06	TRUE	4.68768e-14
Excitatory_control_CENPK	insomnia	0.12109	1.23934e-06	TRUE	1.41342e-15
Excitatory_control_FABP1	insomnia	0.0636061	2.00613e-07	TRUE	1.38821e-08
Oligodendrocytes_control_GSTM3	insomnia	0.0692136	2.16913e-08	TRUE	2.87485e-09
Excitatory_control_CCDC82	insomnia	0.0804954	1.08706e-05	TRUE	2.00528e-10
Oligodendrocytes_control_B3GNTL1	insomnia	0.0600717	1.64605e-06	TRUE	4.03307e-08
Astrocytes_control_TEAD2	insomnia	0.0641077	1.13263e-06	TRUE	1.31066e-08
Oligodendrocytes_control_LINC00539	insomnia	0.0658597	6.28887e-07	TRUE	7.85421e-09
Excitatory_control_ZNF320	insomnia	0.110778	2.16157e-06	TRUE	2.99424e-14
Microglia_control_RBM19	insomnia	0.0593405	1.00494e-06	TRUE	4.74907e-08
Excitatory_control_ALDH7A1	insomnia	0.0626326	7.52388e-07	TRUE	1.9093e-08
Astrocytes_control_MIR4713HG	insomnia	0.0813234	3.33836e-06	TRUE	1.29068e-10
Inhibitory_control_ANKRD36B	insomnia	0.135505	9.35047e-07	TRUE	1.95e-17
OPCs_control_ARHGAP15	insomnia	0.0996068	6.32294e-06	TRUE	8.61828e-13
Endothelial_control_PM20D1	insomnia	0.100097	1.88736e-06	TRUE	6.24106e-13
Astrocytes_control_DAB1	insomnia	0.085082	2.05745e-06	TRUE	4.29068e-11
Excitatory_control_ZNF502	insomnia	0.0807846	3.32622e-06	TRUE	1.49777e-10
Endothelial_control_DDX11	insomnia	0.0934267	7.77301e-08	TRUE	3.46656e-12
Pericytes_control_PTBP1	insomnia	0.0607093	1.89583e-06	TRUE	3.43316e-08
Excitatory_control_LINC01535	insomnia	0.106545	2.52327e-05	TRUE	1.82047e-13
Oligodendrocytes_control_RCBTB1	insomnia	0.0893401	2.23453e-06	TRUE	1.31908e-11
Pericytes_control_DNAH11	insomnia	0.0757233	2.98851e-07	TRUE	5.05674e-10
Excitatory_control_SOHLH2	insomnia	0.0651541	8.72129e-07	TRUE	9.69412e-09
Excitatory_control_CNKSR1	insomnia	0.090137	1.34882e-06	TRUE	1.00262e-11
Excitatory_control_RAB17	insomnia	0.0891409	5.2557e-07	TRUE	1.24017e-11
Excitatory_control_COLEC11	insomnia	0.10924	1.41175e-05	TRUE	6.85254e-14
Oligodendrocytes_control_PPM1K-DT	insomnia	0.13538	1.15217e-05	TRUE	3.20352e-17
Oligodendrocytes_control_BAALC	insomnia	0.0893916	6.99915e-07	TRUE	1.17712e-11
Oligodendrocytes_control_MFGE8	insomnia	0.0963362	1.59466e-06	TRUE	1.77886e-12
Excitatory_control_EPB41L5	insomnia	0.0896053	2.13536e-06	TRUE	1.21885e-11
Inhibitory_control_MPPE1	insomnia	0.0851223	3.13368e-06	TRUE	4.45973e-11
OPCs_control_CCDC32	insomnia	0.0686485	6.40427e-06	TRUE	4.61456e-09
Excitatory_control_LINC00665	insomnia	0.0916646	3.60746e-07	TRUE	5.98763e-12
Microglia_control_BEND6	insomnia	0.0678607	7.99035e-08	TRUE	4.24347e-09
Inhibitory_control_PAH	insomnia	0.0608368	1.36002e-05	TRUE	4.43122e-08
Oligodendrocytes_control_PIGF	insomnia	0.0640239	4.31846e-06	TRUE	1.52773e-08
Oligodendrocytes_control_ST3GAL5	insomnia	0.129297	3.30812e-08	TRUE	1.06597e-16
Oligodendrocytes_control_STMN4	insomnia	0.162362	6.4943e-08	TRUE	4.73559e-21
Excitatory_control_LYSMD4	insomnia	0.0947698	3.49254e-07	TRUE	2.49118e-12
Endothelial_control_LINC01060	insomnia	0.0720755	2.50749e-07	TRUE	1.37349e-09
Inhibitory_control_KANK3	insomnia	0.0756038	2.26481e-07	TRUE	5.17468e-10
Excitatory_control_CCDC171	insomnia	0.0802925	5.42596e-07	TRUE	1.46668e-10
Oligodendrocytes_control_MTUS1	insomnia	0.0606415	2.85629e-06	TRUE	3.63767e-08
Astrocytes_control_DSCC1	insomnia	0.0758401	5.17324e-06	TRUE	6.23932e-10
Excitatory_control_ASAH2	insomnia	0.0889291	5.67544e-06	TRUE	1.69325e-11
Excitatory_control_CCZ1B	insomnia	0.0808351	3.46093e-07	TRUE	1.23464e-10
Excitatory_control_CCDC88B	insomnia	0.132202	5.73471e-08	TRUE	4.54929e-17
OPCs_control_LINC02552	insomnia	0.115845	1.13465e-05	TRUE	9.6403e-15
Excitatory_control_MEIOB	insomnia	0.11966	1.02168e-05	TRUE	3.10298e-15
Excitatory_control_DNAH17	insomnia	0.0611055	1.7082e-06	TRUE	3.0566e-08
Excitatory_control_PCNX4	insomnia	0.0816889	9.80491e-06	TRUE	1.40959e-10
Astrocytes_control_AXDND1	insomnia	0.0665092	1.11345e-07	TRUE	6.1861e-09
Excitatory_control_RSPO4	insomnia	0.0646219	8.96111e-07	TRUE	1.1221e-08
Endothelial_control_SLC4A1AP	insomnia	0.0612739	1.06156e-07	TRUE	2.57998e-08
Oligodendrocytes_control_DHFR2	insomnia	0.0615918	5.32075e-08	TRUE	2.33737e-08
Excitatory_control_LINC01291	insomnia	0.124086	2.01226e-05	TRUE	1.07969e-15
Microglia_control_ESRRG	insomnia	0.113922	3.0629e-06	TRUE	1.26896e-14
Excitatory_control_ADD3	insomnia	0.0708785	3.82972e-06	TRUE	2.32583e-09
OPCs_control_LINC01060	insomnia	0.078871	1.03734e-07	TRUE	2.04934e-10
Excitatory_control_WFIKKN1	insomnia	0.0933648	5.75417e-06	TRUE	4.91358e-12
Oligodendrocytes_control_XRCC2	insomnia	0.0996153	1.60354e-06	TRUE	7.03347e-13
Inhibitory_control_PRSS55	insomnia	0.125433	1.95443e-05	TRUE	7.21066e-16
Inhibitory_control_CCDC66	insomnia	0.0628081	1.12054e-06	TRUE	1.86559e-08
Inhibitory_control_EFCAB2	insomnia	0.0625947	3.55644e-05	TRUE	3.67457e-08
Astrocytes_control_ARHGAP28	insomnia	0.0733809	7.22801e-07	TRUE	1.00645e-09
Inhibitory_control_LINC02652	insomnia	0.102821	2.01543e-08	TRUE	2.34991e-13
Oligodendrocytes_control_PSG1	insomnia	0.0747215	3.46581e-07	TRUE	6.70715e-10
Excitatory_control_COMMD6	insomnia	0.161125	1.78567e-05	TRUE	1.58837e-20
Excitatory_control_GLB1	insomnia	0.128309	4.27008e-06	TRUE	2.02185e-16
Oligodendrocytes_control_PRAG1	insomnia	0.0637573	8.85039e-06	TRUE	1.84213e-08
Oligodendrocytes_control_ACCS	insomnia	0.154218	1.64392e-06	TRUE	7.23243e-20
OPCs_control_FRG1-DT	insomnia	0.102215	2.31983e-07	TRUE	2.95819e-13
Oligodendrocytes_control_TMEM108	insomnia	0.112383	1.24037e-06	TRUE	1.77416e-14
Astrocytes_control_LRRC37A2	insomnia	0.147545	8.89426e-06	TRUE	7.75332e-19
Inhibitory_control_CLHC1	insomnia	0.128992	4.51343e-06	TRUE	1.67047e-16
Astrocytes_control_HP	insomnia	0.104557	2.4283e-06	TRUE	1.80768e-13
Endothelial_control_ZSCAN31	insomnia	0.0691695	5.64793e-06	TRUE	3.92229e-09
Excitatory_control_LINC00648	insomnia	0.0602187	4.82473e-07	TRUE	3.60058e-08
Excitatory_control_HDDC2	insomnia	0.0973018	3.75822e-06	TRUE	1.50767e-12
Oligodendrocytes_control_ALDH8A1	insomnia	0.122327	3.93712e-06	TRUE	1.15087e-15
Oligodendrocytes_control_AATF	insomnia	0.0612739	5.64936e-07	TRUE	2.72243e-08
Inhibitory_control_HBS1L	insomnia	0.0618454	6.39623e-06	TRUE	2.91987e-08
Excitatory_control_LCA5L	insomnia	0.149161	4.78408e-06	TRUE	4.06015e-19
Pericytes_control_U2AF1	insomnia	0.0896607	1.08587e-06	TRUE	1.12537e-11
Excitatory_control_MOV10	insomnia	0.0766227	1.05336e-05	TRUE	5.77076e-10
Astrocytes_control_LRRC37A	insomnia	0.110054	8.89426e-06	TRUE	4.7637e-14
Excitatory_control_MPPE1	insomnia	0.141122	3.13368e-06	TRUE	4.23274e-18
Endothelial_control_HLA-DMA	insomnia	0.0598933	1.56345e-05	TRUE	5.89542e-08
Inhibitory_control_STOX1	insomnia	0.0851879	1.47718e-05	TRUE	5.95303e-11
Inhibitory_control_HLA-DOB	insomnia	0.0872947	7.04779e-07	TRUE	2.11653e-11
Oligodendrocytes_control_RFPL3S	insomnia	0.0750904	7.82044e-07	TRUE	6.31372e-10
Microglia_control_MIR4300HG	insomnia	0.0674586	2.06947e-06	TRUE	5.52131e-09
Oligodendrocytes_control_MYOM2	insomnia	0.0663104	9.03812e-07	TRUE	7.08517e-09
OPCs_control_RAB27A	insomnia	0.0659097	4.33165e-06	TRUE	9.16257e-09
Excitatory_control_AVPR1A	insomnia	0.0626709	8.841e-07	TRUE	1.90709e-08
Oligodendrocytes_control_NPAP1	insomnia	0.0592778	1.18025e-06	TRUE	4.88046e-08
Excitatory_control_KIF25	insomnia	0.093982	5.57534e-07	TRUE	3.18884e-12
Excitatory_control_SRR	insomnia	0.0907629	9.0805e-06	TRUE	1.11746e-11
OPCs_control_PEX5L	insomnia	0.103877	3.48031e-06	TRUE	2.30811e-13
Excitatory_control_ECM2	insomnia	0.0615204	9.5205e-07	TRUE	2.61926e-08
Excitatory_control_NAGA	insomnia	0.0644015	1.35161e-05	TRUE	1.69341e-08
Oligodendrocytes_control_MAPRE2	insomnia	0.0645896	1.07121e-06	TRUE	1.14524e-08
Excitatory_control_CIAO3	insomnia	0.114477	3.33132e-06	TRUE	1.09492e-14
Microglia_control_AADAC	insomnia	0.0620843	7.04299e-06	TRUE	2.78049e-08
Excitatory_control_TTC21A	insomnia	0.0604347	2.80925e-06	TRUE	3.83979e-08
Excitatory_control_VRK1	insomnia	0.0825993	4.87186e-08	TRUE	7.16173e-11
Oligodendrocytes_control_LINC02268	insomnia	0.0751776	1.15905e-06	TRUE	6.33304e-10
Oligodendrocytes_control_STEAP1B	insomnia	0.0685729	1.72768e-06	TRUE	4.0065e-09
Microglia_control_FBN2	insomnia	0.191079	5.89919e-07	TRUE	5.76909e-25
Excitatory_control_NUDT12	insomnia	0.10262	2.3488e-06	TRUE	3.12933e-13
Astrocytes_control_HLA-C	insomnia	0.0715001	5.05839e-06	TRUE	2.04129e-09
Astrocytes_control_PRKG1	insomnia	0.104134	1.60576e-06	TRUE	1.94372e-13
Excitatory_control_FAM153A	insomnia	0.0653145	9.89099e-06	TRUE	1.23671e-08
OPCs_control_STMP1	insomnia	0.0592391	6.64602e-06	TRUE	5.93128e-08
Excitatory_control_KLRC2	insomnia	0.0609082	8.40647e-06	TRUE	3.93684e-08
OPCs_control_CENPP	insomnia	0.0767553	9.5205e-07	TRUE	4.03986e-10
Oligodendrocytes_control_S100A13	insomnia	0.0842383	1.95559e-06	TRUE	5.39847e-11
Inhibitory_control_TDRD5	insomnia	0.121123	8.81588e-06	TRUE	1.949e-15
Excitatory_control_LINC02652	insomnia	0.150353	2.65746e-08	TRUE	1.88195e-19
Oligodendrocytes_control_SLC35E3	insomnia	0.0592391	6.86102e-07	TRUE	4.77757e-08
Inhibitory_control_SMC2	insomnia	0.0704527	2.09805e-07	TRUE	2.13383e-09
Inhibitory_control_SNX8	insomnia	0.079743	1.67975e-06	TRUE	1.85127e-10
Inhibitory_control_DSCC1	insomnia	0.121804	4.37541e-06	TRUE	1.36688e-15
Inhibitory_control_KANSL1	insomnia	0.200913	8.89426e-06	TRUE	3.88774e-26
Excitatory_control_FUT2	insomnia	0.068364	1.20565e-06	TRUE	4.12131e-09
Excitatory_control_GUCA1B	insomnia	0.125444	1.10667e-05	TRUE	5.89624e-16
Excitatory_control_SLC28A2	insomnia	0.0849016	1.55504e-06	TRUE	4.38773e-11
Excitatory_control_FRG1-DT	insomnia	0.173338	7.97616e-07	TRUE	1.73969e-22
Excitatory_control_PPM1K-DT	insomnia	0.0936273	9.04733e-06	TRUE	5.01484e-12
Astrocytes_control_DPH1	insomnia	0.0711111	3.23457e-06	TRUE	2.13622e-09
Excitatory_control_STRC	insomnia	0.0727564	2.82577e-06	TRUE	1.33946e-09
Endothelial_control_FAM118A	insomnia	0.106268	9.55654e-07	TRUE	1.00609e-13
OPCs_control_ITGB3BP	insomnia	0.072903	1.16522e-07	TRUE	1.07e-09
Oligodendrocytes_control_FAM131C	insomnia	0.0849556	1.88424e-05	TRUE	6.82945e-11
Oligodendrocytes_control_NPIPB2	insomnia	0.202511	6.7991e-06	TRUE	2.10553e-26
Astrocytes_control_ACOT1	insomnia	0.0618608	3.09285e-06	TRUE	2.63692e-08
Oligodendrocytes_control_SRA1	insomnia	0.0994285	9.75334e-08	TRUE	6.35735e-13
Excitatory_control_CR2	insomnia	0.0608723	3.43509e-06	TRUE	3.48745e-08
Inhibitory_control_ARL17A	insomnia	0.0801001	1.45299e-05	TRUE	2.40659e-10
OPCs_control_RGR	insomnia	0.0787389	6.32183e-06	TRUE	2.90917e-10
Oligodendrocytes_control_FRG1-DT	insomnia	0.0972793	5.47242e-07	TRUE	1.25346e-12
Oligodendrocytes_control_F11R	insomnia	0.0654294	2.85538e-06	TRUE	9.91951e-09
Excitatory_control_WDSUB1	insomnia	0.0939639	6.09913e-08	TRUE	2.96249e-12
Pericytes_control_SOS2	insomnia	0.0653854	7.84453e-08	TRUE	8.35634e-09
Excitatory_control_DRICH1	insomnia	0.0615062	1.05046e-06	TRUE	2.646e-08
Excitatory_control_LINS1	insomnia	0.115773	4.67815e-07	TRUE	6.16691e-15
Astrocytes_control_PPM1K-DT	insomnia	0.188407	9.04733e-06	TRUE	2.28375e-24
Excitatory_control_GSTM3	insomnia	0.16405	6.83741e-07	TRUE	3.15836e-21
Oligodendrocytes_control_CCDC82	insomnia	0.157929	1.16949e-05	TRUE	3.58871e-20
Inhibitory_control_OR2L5	insomnia	0.0661654	3.67727e-07	TRUE	7.04357e-09
Excitatory_control_OR3A2	insomnia	0.0598842	6.39465e-06	TRUE	4.95713e-08
Oligodendrocytes_control_WNT2	insomnia	0.0684444	4.55297e-06	TRUE	4.62762e-09
Excitatory_control_HLA-DQA1	insomnia	0.0622872	9.08389e-06	TRUE	2.75389e-08
Astrocytes_control_POU2F3	insomnia	0.127339	6.15056e-07	TRUE	2.12556e-16
Inhibitory_control_TBC1D3D	insomnia	0.0723228	1.89131e-07	TRUE	1.27188e-09
Astrocytes_control_SNX31	insomnia	0.11472	3.32571e-06	TRUE	1.02081e-14
Excitatory_control_LINC00958	insomnia	0.0850103	2.27752e-06	TRUE	4.42877e-11
Oligodendrocytes_control_ZNF343	insomnia	0.0824704	1.00397e-07	TRUE	7.5296e-11
Inhibitory_control_MX1	insomnia	0.0777239	2.12779e-08	TRUE	2.74712e-10
Oligodendrocytes_control_LINC00654	insomnia	0.0698536	2.29993e-06	TRUE	2.90073e-09
Microglia_control_CYP27A1	insomnia	0.0917972	8.4725e-06	TRUE	8.24031e-12
Oligodendrocytes_control_ABCA9	insomnia	0.0664984	4.55199e-08	TRUE	6.10779e-09
Inhibitory_control_ACADS	insomnia	0.098587	2.42208e-06	TRUE	9.86199e-13
Oligodendrocytes_control_EBPL	insomnia	0.0999357	1.94144e-06	TRUE	6.55409e-13
Excitatory_control_FARP2	insomnia	0.0907403	1.08211e-05	TRUE	1.1729e-11
Excitatory_control_PLEKHH2	insomnia	0.0680426	1.42427e-06	TRUE	4.5592e-09
Oligodendrocytes_control_FRRS1L	insomnia	0.0604773	4.95092e-07	TRUE	3.36077e-08
Inhibitory_control_HLA-C	insomnia	0.105747	8.60519e-06	TRUE	1.61792e-13
Oligodendrocytes_control_LINC01600	insomnia	0.0710561	1.60548e-07	TRUE	1.79351e-09
Excitatory_control_GLP2R	insomnia	0.0671912	1.48297e-06	TRUE	5.76962e-09
OPCs_control_CLHC1	insomnia	0.122166	4.51343e-06	TRUE	1.23685e-15
Microglia_control_ZNF215	insomnia	0.0856545	5.09262e-06	TRUE	4.13526e-11
Excitatory_control_OR2L2	insomnia	0.0808098	3.67727e-07	TRUE	1.24653e-10
Inhibitory_control_IBSP	insomnia	0.0899814	1.67011e-06	TRUE	1.06949e-11
Inhibitory_control_LINC02482	insomnia	0.0780803	2.93172e-06	TRUE	3.11113e-10
Excitatory_control_GJC1	insomnia	0.104254	2.03739e-06	TRUE	1.92832e-13
Astrocytes_control_LINC01354	insomnia	0.0733135	1.01599e-05	TRUE	1.41386e-09
Excitatory_control_KIF6	insomnia	0.101029	1.40436e-06	TRUE	4.64458e-13
Excitatory_control_CTSS	insomnia	0.0794873	9.35408e-06	TRUE	2.55803e-10
Excitatory_control_SESTD1	insomnia	0.131414	5.95056e-06	TRUE	8.66382e-17
OPCs_control_LINC02268	insomnia	0.218928	2.79326e-07	TRUE	5.22085e-29
Microglia_control_JAZF1	insomnia	0.0945089	5.75214e-06	TRUE	3.5597e-12
Inhibitory_control_TTC23	insomnia	0.074246	1.0365e-06	TRUE	8.12087e-10
Inhibitory_control_RNF8	insomnia	0.078871	2.244e-06	TRUE	2.42532e-10
Astrocytes_control_MGST1	insomnia	0.0614781	3.61498e-06	TRUE	2.97766e-08
Oligodendrocytes_control_ODAPH	insomnia	0.0773688	1.22676e-05	TRUE	4.87366e-10
Excitatory_control_FREM1	insomnia	0.108887	4.91333e-07	TRUE	4.52833e-14
Endothelial_control_SULT1C2	insomnia	0.171148	2.6576e-06	TRUE	4.07321e-22
Inhibitory_control_COL28A1	insomnia	0.0596796	3.13952e-06	TRUE	4.76705e-08
Oligodendrocytes_control_LINC01098	insomnia	0.0862768	5.23078e-06	TRUE	3.4961e-11
Excitatory_control_PILRB	insomnia	0.109706	9.33355e-07	TRUE	3.74153e-14
Excitatory_control_CHDH	insomnia	0.0748505	4.12677e-06	TRUE	7.9142e-10
Excitatory_control_LINC02080	insomnia	0.139234	1.29296e-05	TRUE	1.05896e-17
Excitatory_control_LSG1	insomnia	0.0862436	1.35362e-06	TRUE	2.98119e-11
Inhibitory_control_ODF4	insomnia	0.0618764	9.61448e-08	TRUE	2.18495e-08
Inhibitory_control_CCDC82	insomnia	0.0758401	1.08706e-05	TRUE	7.19519e-10
OPCs_control_KLHL1	insomnia	0.0904005	1.13747e-06	TRUE	9.17746e-12
Oligodendrocytes_control_NPIPA5	insomnia	0.07644	2.83268e-06	TRUE	4.86859e-10
Oligodendrocytes_control_ANKRD36	insomnia	0.122144	4.12047e-07	TRUE	9.54584e-16
Inhibitory_control_SNX19	insomnia	0.0629092	2.60318e-06	TRUE	1.94824e-08
Inhibitory_control_LINC02470	insomnia	0.0941398	1.23667e-07	TRUE	2.8656e-12
Oligodendrocytes_control_GNPTAB	insomnia	0.151543	5.11132e-06	TRUE	1.99653e-19
Excitatory_control_GALM	insomnia	0.111919	7.26686e-06	TRUE	2.65839e-14
Excitatory_control_SLC25A34	insomnia	0.107462	1.31778e-08	TRUE	6.18003e-14
Excitatory_control_APOLD1	insomnia	0.0873538	1.22973e-09	TRUE	1.84355e-11
Oligodendrocytes_control_CD46	insomnia	0.0724796	7.55518e-06	TRUE	1.67195e-09
Excitatory_control_CCDC163	insomnia	0.186295	5.35693e-07	TRUE	2.68928e-24
Oligodendrocytes_control_GATM	insomnia	0.101697	1.56525e-06	TRUE	3.88303e-13
Microglia_control_SAXO2	insomnia	0.0966243	5.1273e-07	TRUE	1.5032e-12
Oligodendrocytes_control_TRIM66	insomnia	0.0598297	5.44126e-06	TRUE	4.90778e-08
Excitatory_control_MDH1B	insomnia	0.0882426	1.64735e-07	TRUE	1.51987e-11
Astrocytes_control_GAL3ST2	insomnia	0.0664611	4.02137e-06	TRUE	7.8085e-09
Oligodendrocytes_control_PWP2	insomnia	0.184191	7.16162e-06	TRUE	8.19713e-24
Excitatory_control_KNSTRN	insomnia	0.0837205	5.06084e-06	TRUE	7.06567e-11
Excitatory_control_HLA-DRB5	insomnia	0.0909169	4.20401e-06	TRUE	9.23502e-12
Excitatory_control_LDB3	insomnia	0.0784081	6.59272e-07	TRUE	2.50061e-10
Oligodendrocytes_control_VARS2	insomnia	0.0992741	3.26512e-08	TRUE	6.50286e-13
Excitatory_control_SLC44A3	insomnia	0.110989	2.42401e-09	TRUE	2.21112e-14
Oligodendrocytes_control_WASHC4	insomnia	0.0941589	4.03734e-06	TRUE	3.69585e-12
Microglia_control_ETS2	insomnia	0.066788	5.98815e-07	TRUE	6.07457e-09
Inhibitory_control_PPM1K-DT	insomnia	0.0979146	1.15217e-05	TRUE	1.5987e-12
Inhibitory_control_LINC02150	insomnia	0.0870262	8.23498e-07	TRUE	2.30688e-11
OPCs_control_PTPRJ	insomnia	0.0728732	1.47626e-05	TRUE	1.74317e-09
Microglia_control_HLA-DMA	insomnia	0.0849093	1.69846e-05	TRUE	6.69758e-11
Inhibitory_control_BTBD16	insomnia	0.0685823	2.01962e-06	TRUE	4.05366e-09
Excitatory_control_PDPN	insomnia	0.0610677	1.27224e-07	TRUE	2.74029e-08
Inhibitory_control_PRPSAP1	insomnia	0.0593563	3.61346e-06	TRUE	5.28519e-08
Inhibitory_control_C12orf60	insomnia	0.0660926	7.92453e-06	TRUE	9.59102e-09
Inhibitory_control_ZNF429	insomnia	0.063208	7.38001e-08	TRUE	1.51229e-08
Inhibitory_control_ANKRD18B	insomnia	0.142617	8.42717e-06	TRUE	3.36895e-18
Astrocytes_control_CAMK4	insomnia	0.073347	2.08362e-06	TRUE	1.10313e-09
Excitatory_control_CDON	insomnia	0.0904695	1.25377e-06	TRUE	9.07832e-12
Excitatory_control_ASNSD1	insomnia	0.0594856	1.86682e-07	TRUE	4.25282e-08
Inhibitory_control_SFXN4	insomnia	0.0615062	2.08265e-06	TRUE	2.79063e-08
Excitatory_control_RPN1	insomnia	0.174706	2.7224e-07	TRUE	1.04124e-22
OPCs_control_KCNJ6	insomnia	0.090012	2.21406e-06	TRUE	1.09173e-11
Excitatory_control_HLA-DRB1	insomnia	0.107139	1.74937e-05	TRUE	1.33823e-13
Excitatory_control_TRHR	insomnia	0.061709	1.01965e-05	TRUE	3.29144e-08
OPCs_control_NSF	insomnia	0.064961	4.54584e-06	TRUE	1.19367e-08
OPCs_control_TTC23	insomnia	0.0802925	2.79094e-07	TRUE	1.4237e-10
Inhibitory_control_NRG4	insomnia	0.0974869	6.55319e-08	TRUE	1.09383e-12
Excitatory_control_CCDC141	insomnia	0.101427	9.96313e-06	TRUE	5.71193e-13
Oligodendrocytes_control_ZNF100	insomnia	0.143485	6.04973e-06	TRUE	2.37951e-18
Oligodendrocytes_control_MCCC2	insomnia	0.0624468	3.30261e-06	TRUE	2.26622e-08
Excitatory_control_EXT2	insomnia	0.0950387	4.78104e-06	TRUE	2.96765e-12
Microglia_control_SLFN5	insomnia	0.0966431	2.09889e-06	TRUE	1.6799e-12
Oligodendrocytes_control_FN3K	insomnia	0.0919871	5.17043e-06	TRUE	7.08303e-12
Endothelial_control_EXOC3L2	insomnia	0.0716679	1.23195e-06	TRUE	1.6697e-09
Microglia_control_CPVL	insomnia	0.0637573	1.13918e-06	TRUE	1.44351e-08
Oligodendrocytes_control_LINC01182	insomnia	0.0750958	4.5664e-06	TRUE	7.50815e-10
Microglia_control_ASPRV1	insomnia	0.0596537	8.45877e-06	TRUE	5.52547e-08
Excitatory_control_MRPL23	insomnia	0.0956877	1.06063e-06	TRUE	2.05937e-12
OPCs_control_DDX11	insomnia	0.123924	1.51158e-07	TRUE	5.40594e-16
Inhibitory_control_SMCO4	insomnia	0.0621174	3.45066e-06	TRUE	2.49054e-08
Inhibitory_control_PDGFC	insomnia	0.0591932	1.69935e-06	TRUE	5.12962e-08
Inhibitory_control_TRIM44	insomnia	0.0632752	2.0263e-06	TRUE	1.72131e-08
Excitatory_control_HLA-C	insomnia	0.0680507	4.48569e-06	TRUE	5.14023e-09
Excitatory_control_LINC00839	insomnia	0.100536	5.47858e-07	TRUE	4.97233e-13
Excitatory_control_ITIH2	insomnia	0.0601103	5.53148e-07	TRUE	3.731e-08
Excitatory_control_IFT88	insomnia	0.0954492	2.82541e-07	TRUE	2.03615e-12
Excitatory_control_RNASEH2B	insomnia	0.150583	1.50677e-06	TRUE	2.17307e-19
Oligodendrocytes_control_SLC27A1	insomnia	0.119551	6.35519e-10	TRUE	1.82669e-15
Astrocytes_control_TRIM66	insomnia	0.103573	4.52988e-06	TRUE	2.62772e-13
Excitatory_control_MFSD13A	insomnia	0.118779	1.31404e-05	TRUE	4.32052e-15
Excitatory_control_CFAP299	insomnia	0.0962676	4.37276e-07	TRUE	1.64918e-12
Inhibitory_control_RAD51C	insomnia	0.072933	1.41454e-05	TRUE	1.69631e-09
Excitatory_control_GFM2	insomnia	0.0707422	3.52508e-06	TRUE	2.38844e-09
Excitatory_control_HELB	insomnia	0.084395	5.07428e-07	TRUE	4.66948e-11
Astrocytes_control_TOGARAM2	insomnia	0.0895779	1.24768e-06	TRUE	1.16577e-11
Microglia_control_APIP	insomnia	0.0849868	4.00852e-06	TRUE	4.79372e-11
Inhibitory_control_NPIPA5	insomnia	0.0904349	2.83268e-06	TRUE	9.99058e-12
Endothelial_control_SMAD4	insomnia	0.0595771	1.01458e-05	TRUE	5.83771e-08
Excitatory_control_COL3A1	insomnia	0.0693955	2.83327e-08	TRUE	2.74281e-09
Inhibitory_control_TPM2	insomnia	0.113602	7.25417e-07	TRUE	1.19207e-14
OPCs_control_PAX8	insomnia	0.0699335	1.3325e-06	TRUE	2.70235e-09
OPCs_control_USP6	insomnia	0.072903	4.24728e-06	TRUE	1.35646e-09
Microglia_control_RASGEF1C	insomnia	0.0759471	1.89672e-06	TRUE	5.34392e-10
Oligodendrocytes_control_RGS7	insomnia	0.161754	1.60701e-05	TRUE	1.2522e-20
Excitatory_control_RAD21L1	insomnia	0.121106	3.57341e-07	TRUE	1.28354e-15
Excitatory_control_CA3	insomnia	0.0942359	2.45226e-06	TRUE	3.37422e-12
Oligodendrocytes_control_TBCA	insomnia	0.0597761	6.14842e-06	TRUE	5.06989e-08
Astrocytes_control_TRMT9B	insomnia	0.0936939	3.93539e-07	TRUE	3.39414e-12
Excitatory_control_VPS53	insomnia	0.0634134	9.92919e-06	TRUE	2.06736e-08
Oligodendrocytes_control_PDE2A	insomnia	0.144768	2.03316e-05	TRUE	2.4157e-18
Microglia_control_ERVH48-1	insomnia	0.0662951	2.29957e-06	TRUE	7.66173e-09
Excitatory_control_LINC02234	insomnia	0.0664032	3.62357e-06	TRUE	7.82524e-09
Excitatory_control_TESC	insomnia	0.0890217	4.57622e-06	TRUE	1.59036e-11
Oligodendrocytes_control_TTC23	insomnia	0.150029	1.95283e-06	TRUE	2.66356e-19
Excitatory_control_CAPRIN2	insomnia	0.0629298	3.02553e-08	TRUE	1.61124e-08
Astrocytes_control_IQCB1	insomnia	0.0876322	2.06686e-06	TRUE	2.10791e-11
Oligodendrocytes_control_DACH1	insomnia	0.0829696	3.90995e-07	TRUE	6.85617e-11
Excitatory_control_CASP8	insomnia	0.159936	1.66601e-06	TRUE	1.2466e-20
Excitatory_control_LINC02268	insomnia	0.180756	2.79326e-07	TRUE	1.52123e-23
Excitatory_control_MUC5B	insomnia	0.0623221	5.51689e-07	TRUE	2.04496e-08
Inhibitory_control_HSD17B13	insomnia	0.091655	9.26156e-06	TRUE	8.75172e-12
Oligodendrocytes_control_PGM2	insomnia	0.0624833	2.40574e-07	TRUE	1.89537e-08
Oligodendrocytes_control_LINC01299	insomnia	0.0919766	4.26053e-06	TRUE	6.87762e-12
Excitatory_control_IMMT	insomnia	0.0946153	4.22516e-06	TRUE	3.27398e-12
Oligodendrocytes_control_SORCS2	insomnia	0.0821667	2.83691e-05	TRUE	1.69691e-10
Astrocytes_control_SFTPD	insomnia	0.0705946	4.22327e-10	TRUE	1.93333e-09
Oligodendrocytes_control_USP6NL	insomnia	0.0897169	3.23379e-07	TRUE	1.03019e-11
Excitatory_control_SCFD1	insomnia	0.0597761	1.0432e-06	TRUE	4.22958e-08
Astrocytes_control_MPPE1	insomnia	0.0952769	3.13368e-06	TRUE	2.59855e-12
Oligodendrocytes_control_TYRP1	insomnia	0.101592	2.93887e-06	TRUE	4.31376e-13
Inhibitory_control_XRRA1	insomnia	0.271745	1.35547e-07	TRUE	3.46939e-37
Oligodendrocytes_control_CNBD1	insomnia	0.129668	1.0511e-06	TRUE	1.11698e-16
OPCs_control_LDHC	insomnia	0.0782155	3.51204e-07	TRUE	2.55489e-10
Astrocytes_control_ZNF266	insomnia	0.0672628	5.02486e-06	TRUE	6.4763e-09
Astrocytes_control_LDHC	insomnia	0.233595	4.88534e-07	TRUE	3.50687e-31
Astrocytes_control_CTTNBP2	insomnia	0.0606303	4.58084e-06	TRUE	3.85918e-08
Inhibitory_control_ZNF266	insomnia	0.0720755	2.04061e-07	TRUE	1.36427e-09
Inhibitory_control_IFT88	insomnia	0.0629298	2.82541e-07	TRUE	1.68694e-08
Microglia_control_PAX8	insomnia	0.120453	1.27013e-06	TRUE	1.70639e-15
Oligodendrocytes_control_SLC8A3	insomnia	0.114324	1.43886e-06	TRUE	1.02696e-14
Endothelial_control_HLA-DRB1	insomnia	0.0819889	4.35595e-06	TRUE	1.11473e-10
Oligodendrocytes_control_UTP23	insomnia	0.0624468	2.15175e-06	TRUE	2.16751e-08
Inhibitory_control_SPINK9	insomnia	0.0653695	7.47287e-07	TRUE	9.05419e-09
Excitatory_control_LY6G5C	insomnia	0.150416	2.00339e-06	TRUE	2.37414e-19
Excitatory_control_ARHGAP25	insomnia	0.116988	7.45759e-07	TRUE	4.47472e-15
OPCs_control_ADAMTS7	insomnia	0.0846148	4.69448e-07	TRUE	4.37264e-11
Endothelial_control_LINC02098	insomnia	0.079505	3.44277e-07	TRUE	1.78604e-10
Oligodendrocytes_control_DDX11	insomnia	0.216164	1.17882e-07	TRUE	1.27446e-28
Astrocytes_control_U2AF1	insomnia	0.19297	1.19897e-06	TRUE	3.36252e-25
Excitatory_control_TTF2	insomnia	0.0680997	8.09008e-06	TRUE	5.5836e-09
Oligodendrocytes_control_CCDC77	insomnia	0.0775947	5.76222e-06	TRUE	3.92036e-10
Astrocytes_control_MGAM	insomnia	0.0693955	8.03006e-06	TRUE	3.92261e-09
Inhibitory_control_WASIR2	insomnia	0.0611565	3.61172e-07	TRUE	2.75791e-08
Excitatory_control_SLC22A18	insomnia	0.0794873	2.89678e-06	TRUE	2.10615e-10
Excitatory_control_ZNF100	insomnia	0.145737	5.90668e-06	TRUE	1.20063e-18
Astrocytes_control_TESK2	insomnia	0.128076	1.45768e-06	TRUE	1.8485e-16
Excitatory_control_SLC9A8	insomnia	0.0687158	3.17068e-07	TRUE	3.48522e-09
Excitatory_control_C2orf74	insomnia	0.134537	9.59171e-07	TRUE	2.60744e-17
Endothelial_control_TMEM245	insomnia	0.0754523	1.62085e-06	TRUE	6.0366e-10
Microglia_control_MAB21L2	insomnia	0.0655898	1.37897e-06	TRUE	8.878e-09
Inhibitory_control_GSTO2	insomnia	0.08574	5.68495e-06	TRUE	4.11515e-11
Astrocytes_control_EMP2	insomnia	0.101131	4.43042e-08	TRUE	3.84996e-13
Oligodendrocytes_control_BAIAP2L2	insomnia	0.0658688	1.31608e-06	TRUE	8.19872e-09
Excitatory_control_ETV7	insomnia	0.0980784	5.98912e-06	TRUE	1.31313e-12
Excitatory_control_CYP4F2	insomnia	0.0607436	3.94032e-07	TRUE	3.09647e-08
Astrocytes_control_C20orf96	insomnia	0.0612739	1.8886e-05	TRUE	4.2755e-08
Excitatory_control_LINC01116	insomnia	0.159328	9.38894e-06	TRUE	2.17266e-20
Oligodendrocytes_control_FBXO32	insomnia	0.0598659	3.2324e-06	TRUE	4.5499e-08
Excitatory_control_OR2M4	insomnia	0.0771093	3.67727e-07	TRUE	3.47667e-10
OPCs_control_LINC00865	insomnia	0.0974164	1.38169e-05	TRUE	1.93552e-12
Excitatory_control_ZNF732	insomnia	0.171512	4.06156e-07	TRUE	2.92916e-22
Inhibitory_control_FAM162B	insomnia	0.0724796	2.57299e-07	TRUE	1.23011e-09
Microglia_control_TECTB	insomnia	0.0603926	8.79911e-06	TRUE	4.56167e-08
Astrocytes_control_APIP	insomnia	0.242471	1.48864e-06	TRUE	1.78695e-32
Astrocytes_control_CCDC122	insomnia	0.122422	7.3163e-07	TRUE	9.13942e-16
Oligodendrocytes_control_PYGB	insomnia	0.0748963	6.08098e-06	TRUE	8.30098e-10
Oligodendrocytes_control_SLCO6A1	insomnia	0.0638882	2.17509e-06	TRUE	1.4668e-08
Excitatory_control_ALLC	insomnia	0.115134	1.41175e-05	TRUE	1.26565e-14
Excitatory_control_FN3K	insomnia	0.0896329	5.17043e-06	TRUE	1.36838e-11
Oligodendrocytes_control_MRPS18C	insomnia	0.0604241	7.34922e-06	TRUE	4.3813e-08
Excitatory_control_MAEL	insomnia	0.0904349	2.34311e-06	TRUE	9.76381e-12
Excitatory_control_CCDC40	insomnia	0.102729	1.18379e-06	TRUE	2.82016e-13
Excitatory_control_GFM1	insomnia	0.120834	4.62804e-05	TRUE	4.17486e-15
Oligodendrocytes_control_SLC4A8	insomnia	0.0629092	4.8106e-06	TRUE	2.09778e-08
Microglia_control_LINC01340	insomnia	0.179349	3.56461e-06	TRUE	3.21998e-23
Microglia_control_RHD	insomnia	0.063969	4.88546e-07	TRUE	1.29836e-08
Excitatory_control_LINC02482	insomnia	0.0984919	1.49852e-06	TRUE	9.60574e-13
Astrocytes_control_WFDC10B	insomnia	0.0740252	2.35756e-06	TRUE	9.26695e-10
Excitatory_control_CCDC93	insomnia	0.0622698	7.7715e-06	TRUE	2.6884e-08
Endothelial_control_IL18R1	insomnia	0.143553	1.91137e-07	TRUE	1.56925e-18
Inhibitory_control_ZNF446	insomnia	0.0608015	2.90684e-05	TRUE	5.5224e-08
Excitatory_control_MYLK4	insomnia	0.090909	8.43555e-06	TRUE	1.05502e-11
Astrocytes_control_ZNF404	insomnia	0.0629713	1.28149e-06	TRUE	1.80123e-08
OPCs_control_CACNA1E	insomnia	0.082059	3.99266e-07	TRUE	8.84131e-11
Oligodendrocytes_control_EFHB	insomnia	0.156819	1.37009e-05	TRUE	5.34174e-20
Astrocytes_control_BAIAP3	insomnia	0.0874904	2.71685e-07	TRUE	1.91112e-11
Oligodendrocytes_control_KCNK1	insomnia	0.0781045	1.32652e-05	TRUE	4.06379e-10
Excitatory_control_ATP6V1C2	insomnia	0.100869	1.0043e-07	TRUE	4.22519e-13
Excitatory_control_CCDC32	insomnia	0.220149	2.06975e-05	TRUE	9.35083e-29
Oligodendrocytes_control_ZNF667	insomnia	0.0616499	3.04235e-06	TRUE	2.78834e-08
Excitatory_control_GPR171	insomnia	0.0669538	2.08102e-05	TRUE	9.53805e-09
Astrocytes_control_EFHB	insomnia	0.12954	1.37009e-05	TRUE	1.90114e-16
Astrocytes_control_NPIPB2	insomnia	0.202743	6.7991e-06	TRUE	1.95051e-26
Astrocytes_control_CCDC163	insomnia	0.0908468	2.53291e-06	TRUE	8.77893e-12
Oligodendrocytes_control_PPP4R2	insomnia	0.0705151	2.88476e-05	TRUE	4.05996e-09
Excitatory_control_CCDC57	insomnia	0.0666908	3.48865e-05	TRUE	1.21884e-08
Excitatory_control_SCGB3A1	insomnia	0.0650691	1.70415e-06	TRUE	1.04075e-08
OPCs_control_ZFHX3	insomnia	0.0659884	2.51744e-06	TRUE	8.40795e-09
OPCs_control_UPF3A	insomnia	0.061955	3.67646e-06	TRUE	2.62269e-08
Astrocytes_control_XYLT2	insomnia	0.0637062	3.59117e-06	TRUE	1.62729e-08
Excitatory_control_SERPINF2	insomnia	0.0729633	2.00917e-06	TRUE	1.22043e-09
Oligodendrocytes_control_FAM184B	insomnia	0.0614922	9.34416e-06	TRUE	3.43038e-08
Excitatory_control_HDHD3	insomnia	0.0827158	6.71997e-06	TRUE	9.81403e-11
Oligodendrocytes_control_CAPN8	insomnia	0.111806	1.3575e-07	TRUE	1.84341e-14
Oligodendrocytes_control_ICOSLG	insomnia	0.0594529	2.44898e-06	TRUE	4.93897e-08
Excitatory_control_KLKB1	insomnia	0.109826	1.07962e-07	TRUE	3.2437e-14
Microglia_control_STK10	insomnia	0.0874596	9.78383e-08	TRUE	1.8681e-11
OPCs_control_KNOP1	insomnia	0.082059	8.88276e-06	TRUE	1.24528e-10
Excitatory_control_CLTCL1	insomnia	0.145755	1.83052e-06	TRUE	9.65525e-19
Astrocytes_control_SNORC	insomnia	0.0935781	1.2954e-07	TRUE	3.36263e-12
Microglia_control_PICALM	insomnia	0.0831841	2.03751e-05	TRUE	1.14112e-10
Oligodendrocytes_control_CCDC163	insomnia	0.106633	9.07315e-07	TRUE	9.0247e-14
Inhibitory_control_FAM153A	insomnia	0.168506	9.89099e-06	TRUE	1.28961e-21
Excitatory_control_ZNF429	insomnia	0.0972348	3.9734e-07	TRUE	1.24752e-12
Oligodendrocytes_control_RAB27A	insomnia	0.124413	4.33165e-06	TRUE	6.36821e-16
Oligodendrocytes_control_AK3	insomnia	0.0668229	1.76026e-07	TRUE	5.74432e-09
Excitatory_control_PARVA	insomnia	0.0775317	2.43932e-06	TRUE	3.54257e-10
Inhibitory_control_DNAJC15	insomnia	0.1317	2.89845e-06	TRUE	6.94009e-17
Oligodendrocytes_control_CCDC15	insomnia	0.0652834	9.03662e-06	TRUE	1.224e-08
Excitatory_control_LINC01630	insomnia	0.0691585	1.5754e-05	TRUE	4.863e-09
Oligodendrocytes_control_ITGAV	insomnia	0.0811257	1.19299e-06	TRUE	1.22531e-10
Excitatory_control_TRPV2	insomnia	0.18969	2.68882e-07	TRUE	8.55578e-25
Excitatory_control_LINC02398	insomnia	0.0633668	1.05119e-06	TRUE	1.5954e-08
Excitatory_control_CYP4V2	insomnia	0.0629505	1.10092e-06	TRUE	1.7926e-08
Microglia_control_PDE4B	insomnia	0.0606081	1.94959e-05	TRUE	5.15385e-08
Microglia_control_LINC02405	insomnia	0.063969	5.12179e-06	TRUE	1.58793e-08
Oligodendrocytes_control_RHD	insomnia	0.114804	4.88546e-07	TRUE	8.19009e-15
Oligodendrocytes_control_AKIRIN1	insomnia	0.124848	8.65873e-08	TRUE	4.04937e-16
Excitatory_control_DNAJC15	insomnia	0.181891	3.16854e-06	TRUE	1.39887e-23
Excitatory_control_LINC00667	insomnia	0.0776587	2.15239e-05	TRUE	5.28043e-10
Excitatory_control_NPIPB2	insomnia	0.240472	6.7991e-06	TRUE	5.20133e-32
Excitatory_control_SLCO5A1	insomnia	0.0820238	6.56829e-07	TRUE	9.1658e-11
Excitatory_control_NINL	insomnia	0.0598751	1.99121e-08	TRUE	3.68836e-08
Inhibitory_control_OTUD3	insomnia	0.0678839	1.27542e-08	TRUE	4.12207e-09
Excitatory_control_ALOX15	insomnia	0.0923933	3.89905e-06	TRUE	6.03527e-12
Astrocytes_control_ZNF100	insomnia	0.0675074	6.42581e-06	TRUE	6.297e-09
Inhibitory_control_MUC20	insomnia	0.0656533	2.99959e-06	TRUE	9.3836e-09
Oligodendrocytes_control_ACOT1	insomnia	0.0717547	6.71779e-06	TRUE	1.99548e-09
Oligodendrocytes_control_PPFIBP1	insomnia	0.0990449	5.15383e-06	TRUE	9.72116e-13
Excitatory_control_COL28A1	insomnia	0.0805187	2.42322e-06	TRUE	1.55096e-10
Inhibitory_control_LINC01060	insomnia	0.238104	7.9197e-08	TRUE	6.49854e-32
Pericytes_control_LINC01060	insomnia	0.114324	1.46425e-07	TRUE	8.91237e-15
Inhibitory_control_TCEA3	insomnia	0.0732147	3.49898e-06	TRUE	1.21237e-09
Oligodendrocytes_control_KCNQ3	insomnia	0.0608723	4.20576e-08	TRUE	2.83431e-08
Excitatory_control_BATF3	insomnia	0.0614226	8.46144e-08	TRUE	2.46687e-08
Excitatory_control_CENPJ	insomnia	0.084264	5.02424e-07	TRUE	4.83915e-11
Oligodendrocytes_control_NINL	insomnia	0.0680507	2.93768e-06	TRUE	4.87277e-09
OPCs_control_GAS8	insomnia	0.0622526	1.99226e-07	TRUE	2.0075e-08
Astrocytes_control_UST	insomnia	0.0900428	7.89842e-07	TRUE	9.87348e-12
Inhibitory_control_TAF1C	insomnia	0.0665687	6.69046e-06	TRUE	8.18028e-09
Oligodendrocytes_control_NPY2R	insomnia	0.190869	2.93687e-08	TRUE	5.38256e-25
Excitatory_control_LINC01163	insomnia	0.0711296	7.53685e-08	TRUE	1.72741e-09
Excitatory_control_THAP4	insomnia	0.0718211	5.22048e-06	TRUE	1.87901e-09
Inhibitory_control_PSCA	insomnia	0.0890452	2.14416e-06	TRUE	1.42601e-11
Inhibitory_control_LINC01291	insomnia	0.106215	2.01226e-05	TRUE	1.82931e-13
Oligodendrocytes_control_MYH11	insomnia	0.0850261	2.11965e-06	TRUE	4.3718e-11
Oligodendrocytes_control_ZNF415	insomnia	0.117892	2.47312e-05	TRUE	7.06911e-15
Oligodendrocytes_control_LINC02550	insomnia	0.0969168	1.38527e-07	TRUE	1.30994e-12
Excitatory_control_PAX8	insomnia	0.0658915	8.24032e-07	TRUE	7.89869e-09
Excitatory_control_PXYLP1	insomnia	0.0644632	1.37022e-06	TRUE	1.20613e-08
Oligodendrocytes_control_OR7D2	insomnia	0.0771938	1.45004e-06	TRUE	3.69655e-10
Oligodendrocytes_control_NEK1	insomnia	0.0777569	1.02961e-06	TRUE	3.08053e-10
Inhibitory_control_CCND3	insomnia	0.06252	2.37881e-07	TRUE	1.87568e-08
Microglia_control_POU5F1	insomnia	0.0670957	1.70085e-06	TRUE	5.98885e-09
Inhibitory_control_RCVRN	insomnia	0.0738747	5.67978e-06	TRUE	1.08591e-09
Excitatory_control_FAM83H	insomnia	0.119096	2.34151e-06	TRUE	2.72452e-15
Microglia_control_NPIPA5	insomnia	0.0630556	2.83268e-06	TRUE	1.88869e-08
Oligodendrocytes_control_DOP1A	insomnia	0.0685729	4.85059e-06	TRUE	4.509e-09
Oligodendrocytes_control_ASPN	insomnia	0.0769281	9.5205e-07	TRUE	3.85166e-10
Excitatory_control_FAM184B	insomnia	0.104134	7.91791e-06	TRUE	2.50742e-13
Inhibitory_control_LCN15	insomnia	0.0877465	6.99856e-06	TRUE	2.44937e-11
Oligodendrocytes_control_LINC01099	insomnia	0.100699	3.25046e-07	TRUE	4.6172e-13
Excitatory_control_SNX16	insomnia	0.0601987	1.88781e-05	TRUE	5.70073e-08
Inhibitory_control_LINC00839	insomnia	0.0960693	3.6561e-06	TRUE	2.12592e-12
Excitatory_control_CLEC2A	insomnia	0.100216	1.23667e-07	TRUE	5.11304e-13
Endothelial_control_GREM2	insomnia	0.0609932	6.7239e-07	TRUE	2.96365e-08
Excitatory_control_TSGA10	insomnia	0.089951	8.62748e-06	TRUE	1.38524e-11
Excitatory_control_GINS3	insomnia	0.126634	9.21022e-07	TRUE	2.70198e-16
Inhibitory_control_LINC00551	insomnia	0.160305	3.87437e-07	TRUE	9.68199e-21
Endothelial_control_SERINC5	insomnia	0.060169	6.7591e-06	TRUE	4.63027e-08
Inhibitory_control_CLEC2A	insomnia	0.0890689	1.23667e-07	TRUE	1.19543e-11
Excitatory_control_RCVRN	insomnia	0.129979	4.84395e-06	TRUE	1.26637e-16
Excitatory_control_OR2L13	insomnia	0.0702275	5.27794e-07	TRUE	2.35354e-09
Excitatory_control_ANKRD36	insomnia	0.124524	4.12047e-07	TRUE	4.74664e-16
Excitatory_control_INPP1	insomnia	0.163659	1.23152e-05	TRUE	6.2614e-21
OPCs_control_DAPL1	insomnia	0.0595687	5.41966e-07	TRUE	4.31926e-08
Astrocytes_control_LINC00499	insomnia	0.114225	3.15328e-06	TRUE	1.16822e-14
Excitatory_control_WWOX	insomnia	0.0776695	2.08359e-06	TRUE	3.35401e-10
OPCs_control_KANK4	insomnia	0.0857592	2.73374e-09	TRUE	2.89039e-11
Excitatory_control_RIBC2	insomnia	0.169085	2.42008e-06	TRUE	7.64951e-22
Oligodendrocytes_control_NMRAL1	insomnia	0.0867004	3.75774e-06	TRUE	2.94758e-11
OPCs_control_NAPRT	insomnia	0.0682595	9.2466e-07	TRUE	4.16457e-09
Excitatory_control_ADAT1	insomnia	0.0808098	1.59886e-06	TRUE	1.37193e-10
Astrocytes_control_ZDHHC21	insomnia	0.0691259	2.3851e-05	TRUE	5.53752e-09
Excitatory_control_OGN	insomnia	0.0819889	9.5205e-07	TRUE	9.48037e-11
Astrocytes_control_RANBP17	insomnia	0.0686772	4.55622e-06	TRUE	4.34458e-09
Oligodendrocytes_control_ZNF566	insomnia	0.0631858	1.38498e-06	TRUE	1.70883e-08
OPCs_control_SHISA9	insomnia	0.0646219	7.44822e-07	TRUE	1.11012e-08
Oligodendrocytes_control_DPH1	insomnia	0.0907216	9.87291e-06	TRUE	1.15286e-11
Excitatory_control_OR2AK2	insomnia	0.0698274	3.67727e-07	TRUE	2.58406e-09
Excitatory_control_PM20D1	insomnia	0.181952	1.74107e-06	TRUE	1.23793e-23
Excitatory_control_ASPN	insomnia	0.0807596	9.5205e-07	TRUE	1.33364e-10
Oligodendrocytes_control_MLKL	insomnia	0.0723744	2.13918e-06	TRUE	1.4434e-09
Inhibitory_control_MGAM	insomnia	0.0754523	9.40362e-06	TRUE	7.74819e-10
Excitatory_control_C12orf60	insomnia	0.0771938	2.43483e-06	TRUE	3.88888e-10
Excitatory_control_B3GNTL1	insomnia	0.0895779	1.94621e-07	TRUE	1.0507e-11
Astrocytes_control_SLC5A11	insomnia	0.0795228	2.17549e-07	TRUE	1.74618e-10
Excitatory_control_GAS8	insomnia	0.217515	7.58688e-08	TRUE	7.92273e-29
Excitatory_control_HSD17B13	insomnia	0.185178	9.26156e-06	TRUE	6.48601e-24
Astrocytes_control_VXN	insomnia	0.0646873	6.9118e-06	TRUE	1.37013e-08
Oligodendrocytes_control_TMEM220	insomnia	0.0751721	1.23128e-05	TRUE	8.89657e-10
Excitatory_control_RAG2	insomnia	0.0629713	1.02243e-06	TRUE	1.77373e-08
Microglia_control_FAM118A	insomnia	0.0794001	3.80748e-07	TRUE	1.84624e-10
Excitatory_control_ZDHHC21	insomnia	0.0762511	2.3851e-05	TRUE	8.02109e-10
Oligodendrocytes_control_ARL14EP	insomnia	0.0602589	4.52669e-06	TRUE	4.26132e-08
OPCs_control_MIAT	insomnia	0.121804	3.55241e-06	TRUE	1.31796e-15
Oligodendrocytes_control_MSH4	insomnia	0.0794697	1.8636e-06	TRUE	2.01661e-10
Astrocytes_control_RFWD3	insomnia	0.0643109	1.59013e-06	TRUE	1.27199e-08
Inhibitory_control_TXNDC15	insomnia	0.0831985	2.86888e-05	TRUE	1.28443e-10
Oligodendrocytes_control_ALDH1L2	insomnia	0.0878815	6.1765e-06	TRUE	2.30277e-11
Astrocytes_control_GMPPB	insomnia	0.0593643	1.71955e-05	TRUE	6.95646e-08
Microglia_control_OSBP2	insomnia	0.0613139	8.70715e-06	TRUE	3.55323e-08
Excitatory_control_RNF114	insomnia	0.0734843	2.13447e-06	TRUE	1.06416e-09
Excitatory_control_ZNF253	insomnia	0.0592314	1.59528e-05	TRUE	7.07498e-08
Microglia_control_NLRP4	insomnia	0.0870811	1.82841e-06	TRUE	2.42772e-11
Inhibitory_control_XKR9	insomnia	0.131905	8.02758e-06	TRUE	8.0673e-17
Excitatory_control_OR2M2	insomnia	0.0676506	3.67727e-07	TRUE	4.69224e-09
Oligodendrocytes_control_ANKRD18A	insomnia	0.0604031	4.40283e-06	TRUE	4.08307e-08
OPCs_control_HLA-B	insomnia	0.0673092	3.05373e-06	TRUE	5.99033e-09
Excitatory_control_ZNF600	insomnia	0.0802706	2.36818e-07	TRUE	1.4234e-10
Oligodendrocytes_control_TMEM45A	insomnia	0.118858	6.85698e-06	TRUE	3.53771e-15
Excitatory_control_P2RX2	insomnia	0.0665415	1.27072e-05	TRUE	9.36501e-09
Oligodendrocytes_control_PWRN1	insomnia	0.107916	1.18025e-06	TRUE	6.38731e-14
Oligodendrocytes_control_MYO5A	insomnia	0.090012	2.39828e-07	TRUE	9.3799e-12
Excitatory_control_LCN15	insomnia	0.154951	1.09996e-06	TRUE	5.50853e-20
Inhibitory_control_SPATA7	insomnia	0.0935863	1.9656e-08	TRUE	3.24134e-12
Excitatory_control_KANK3	insomnia	0.0876645	2.62887e-07	TRUE	1.81662e-11
Inhibitory_control_TRIM31	insomnia	0.0707927	3.40661e-06	TRUE	2.34506e-09
Astrocytes_control_PSORS1C1	insomnia	0.122595	1.04929e-07	TRUE	7.89343e-16
Oligodendrocytes_control_C3orf20	insomnia	0.103412	2.61308e-08	TRUE	1.99053e-13
Astrocytes_control_FREM2	insomnia	0.163339	1.84988e-06	TRUE	4.40599e-21
Microglia_control_RORA	insomnia	0.0978354	1.49377e-07	TRUE	1.01215e-12
Excitatory_control_WBP2NL	insomnia	0.085155	9.39044e-06	TRUE	5.35401e-11
Excitatory_control_MTRF1L	insomnia	0.0987512	4.5331e-06	TRUE	1.03187e-12
Oligodendrocytes_control_PPFIA1	insomnia	0.0903329	1.32405e-06	TRUE	9.47691e-12
Excitatory_control_DPY19L4	insomnia	0.0684625	1.04941e-05	TRUE	5.33154e-09
Inhibitory_control_LINS1	insomnia	0.0843618	4.67815e-07	TRUE	4.69145e-11
Oligodendrocytes_control_C1GALT1	insomnia	0.0759268	1.95191e-06	TRUE	5.38959e-10
Microglia_control_LINC02470	insomnia	0.0704682	1.23667e-07	TRUE	2.09379e-09
Excitatory_control_FIGNL1	insomnia	0.112799	5.38387e-06	TRUE	1.93491e-14
Inhibitory_control_MTCH2	insomnia	0.0620679	4.91098e-05	TRUE	4.81509e-08
Astrocytes_control_TNFAIP6	insomnia	0.0688242	3.02841e-06	TRUE	3.96026e-09
Excitatory_control_CDK10	insomnia	0.0773888	2.36917e-06	TRUE	3.67353e-10
Oligodendrocytes_control_LINC01740	insomnia	0.085082	4.82125e-06	TRUE	4.8075e-11
Excitatory_control_MARK3	insomnia	0.0602791	5.75791e-07	TRUE	3.57099e-08
Microglia_control_LRRC4C	insomnia	0.0686964	9.42045e-06	TRUE	4.89414e-09
Oligodendrocytes_control_MET	insomnia	0.168355	2.8789e-07	TRUE	7.73577e-22
Astrocytes_control_FN3K	insomnia	0.0938746	4.65324e-06	TRUE	4.09636e-12
Pericytes_control_EPG5	insomnia	0.0602995	3.46455e-08	TRUE	3.30464e-08
Endothelial_control_KANSL1	insomnia	0.1414	8.89426e-06	TRUE	4.92353e-18
Inhibitory_control_C3orf20	insomnia	0.119672	2.61308e-08	TRUE	1.80547e-15
