# Supplementary material
Source: Research Square preprint supplement (doi:10.21203/rs.3.rs-9371633/v1)
Supplement: Supplementary file 2 [file 3978391eeeafed08401713b8.xlsx]

## Sheet: Sheet 1
outcome	exposure	method	nsnp	b	se	pval	lo_ci	up_ci	or	or_lci95	or_uci95	fdr
insomnia	Excitatory_control_MTCH2	Wald ratio	1	0.134178	0.0291926	4.301e-06	0.07696	0.191395	1.1436	1.08	1.21094	0.0061
insomnia	Inhibitory_control_MTCH2	Wald ratio	1	0.113797	0.0261247	1.325e-05	0.062593	0.165002	1.12052	1.06459	1.1794	0.0094
insomnia	Excitatory_control_GFM1	Wald ratio	1	-0.100501	0.0237477	2.316e-05	-0.147047	-0.0539554	0.904384	0.863254	0.947474	0.0109
insomnia	Excitatory_control_CAMLG	Wald ratio	1	0.0673591	0.0175255	0.0001213	0.0330091	0.101709	1.06968	1.03356	1.10706	0.0429
insomnia	Inhibitory_control_EFCAB2	Wald ratio	1	0.0517793	0.0140338	0.0002246	0.024273	0.0792856	1.05314	1.02457	1.08251	0.0563
insomnia	Excitatory_control_CCDC57	Wald ratio	1	-0.056037	0.0152515	0.0002386	-0.08593	-0.0261441	0.945504	0.917658	0.974195	0.0563
insomnia	Excitatory_control_ZNF682	Wald ratio	1	0.058126	0.017484	0.0008857	0.0238573	0.0923946	1.05985	1.02414	1.0968	0.084
insomnia	Excitatory_control_TXNDC15	Wald ratio	1	0.0309984	0.00930322	0.0008622	0.0127641	0.0492328	1.03148	1.01285	1.05046	0.084
insomnia	Oligodendrocytes_control_PRSS55	Wald ratio	1	-0.0372821	0.0112808	0.0009501	-0.0593926	-0.0151716	0.963404	0.942337	0.984943	0.084
insomnia	OPCs_control_TXNDC15	Wald ratio	1	0.0437705	0.0131364	0.0008622	0.0180233	0.0695178	1.04474	1.01819	1.07199	0.084
insomnia	Oligodendrocytes_control_TXNDC15	Wald ratio	1	0.0349679	0.0104881	0.0008559	0.0144112	0.0555245	1.03559	1.01452	1.05709	0.084
insomnia	Oligodendrocytes_control_FBXO7	Wald ratio	1	-0.0415356	0.0117921	0.0004278	-0.0646482	-0.018423	0.959315	0.937397	0.981746	0.084
insomnia	Oligodendrocytes_control_SORCS2	Wald ratio	1	-0.0315834	0.00953203	0.0009217	-0.0502662	-0.0129006	0.96891	0.950976	0.987182	0.084
insomnia	Inhibitory_control_ZNF446	Wald ratio	1	-0.0503507	0.0150511	0.0008219	-0.0798508	-0.0208505	0.950896	0.923254	0.979365	0.084
insomnia	Oligodendrocytes_control_PPP4R2	Wald ratio	1	-0.061635	0.0185151	0.0008719	-0.0979247	-0.0253454	0.940226	0.906717	0.974973	0.084
insomnia	Inhibitory_control_TXNDC15	Wald ratio	1	0.0509732	0.015298	0.0008622	0.0209891	0.0809573	1.05229	1.02121	1.08432	0.084
insomnia	Endothelial_control_GNA14	Wald ratio	1	0.0283891	0.00870278	0.001106	0.0113317	0.0454466	1.0288	1.0114	1.0465	0.0921
insomnia	Excitatory_control_GTF2H5	Wald ratio	1	-0.082144	0.0256628	0.00137	-0.132443	-0.0318449	0.921139	0.875953	0.968657	0.1077
insomnia	Oligodendrocytes_control_ZNF160	Wald ratio	1	0.0220031	0.00715713	0.00211	0.00797516	0.0360311	1.02225	1.00801	1.03669	0.1275
insomnia	Oligodendrocytes_control_ZNF347	Wald ratio	1	0.0326923	0.0106341	0.00211	0.0118495	0.053535	1.03323	1.01192	1.05499	0.1275
insomnia	Oligodendrocytes_control_ZDHHC21	Wald ratio	1	0.0358036	0.0116191	0.00206	0.0130302	0.058577	1.03645	1.01312	1.06033	0.1275
insomnia	Excitatory_control_MAPK12	Wald ratio	1	0.0629348	0.0205207	0.002163	0.0227142	0.103155	1.06496	1.02297	1.10866	0.1275
insomnia	Excitatory_control_LINC01535	Wald ratio	1	0.0309497	0.0099065	0.001783	0.011533	0.0503664	1.03143	1.0116	1.05166	0.1275
insomnia	Oligodendrocytes_control_ZNF415	Wald ratio	1	0.028979	0.00942622	0.00211	0.0105036	0.0474544	1.0294	1.01056	1.0486	0.1275
insomnia	Astrocytes_control_ZDHHC21	Wald ratio	1	0.0501252	0.016546	0.00245	0.0176951	0.0825554	1.0514	1.01785	1.08606	0.1333
insomnia	Excitatory_control_ZDHHC21	Wald ratio	1	0.0380836	0.0125711	0.00245	0.0134442	0.0627231	1.03882	1.01353	1.06473	0.1333
insomnia	Oligodendrocytes_control_PDE7A	Wald ratio	1	-0.0232033	0.0077101	0.002617	-0.0383151	-0.00809155	0.977064	0.96241	0.991941	0.1372
insomnia	Excitatory_control_CYP2D6	Wald ratio	1	-0.0316127	0.0107074	0.003153	-0.0525992	-0.0106262	0.968882	0.94876	0.98943	0.1487
insomnia	Astrocytes_control_LRMDA	Wald ratio	1	0.0201291	0.00679635	0.003059	0.00680822	0.0334499	1.02033	1.00683	1.03402	0.1487
insomnia	Oligodendrocytes_control_PDIA2	Wald ratio	1	0.0330548	0.0111839	0.003121	0.0111343	0.0549753	1.03361	1.0112	1.05651	0.1487
insomnia	Excitatory_control_LAMA5	Wald ratio	1	-0.0601822	0.0213456	0.004811	-0.10202	-0.0183449	0.941593	0.903012	0.981822	0.1708
insomnia	Excitatory_control_RUNX1	Wald ratio	1	-0.0362649	0.0128192	0.00467	-0.0613904	-0.0111393	0.964385	0.940456	0.988923	0.1708
insomnia	Astrocytes_control_LINC01291	Wald ratio	1	-0.02404	0.0086239	0.00531	-0.0409428	-0.00713714	0.976247	0.959884	0.992888	0.1708
insomnia	OPCs_control_CACNB2	Wald ratio	1	-0.022803	0.00803971	0.004564	-0.0385608	-0.00704517	0.977455	0.962173	0.99298	0.1708
insomnia	Inhibitory_control_CCDC32	Wald ratio	1	-0.0365114	0.0129066	0.004671	-0.0618083	-0.0112144	0.964147	0.940063	0.988848	0.1708
insomnia	Excitatory_control_HLA-F	Wald ratio	1	-0.0439144	0.015525	0.004675	-0.0743434	-0.0134853	0.957036	0.928353	0.986605	0.1708
insomnia	Oligodendrocytes_control_LINC01291	Wald ratio	1	-0.014987	0.00537632	0.00531	-0.0255246	-0.00444944	0.985125	0.974798	0.99556	0.1708
insomnia	Excitatory_control_LINC01291	Wald ratio	1	-0.0181893	0.00652509	0.00531	-0.0309785	-0.00540016	0.981975	0.969496	0.994614	0.1708
insomnia	Oligodendrocytes_control_PDE2A	Wald ratio	1	0.0161746	0.00580233	0.00531	0.00480201	0.0275472	1.01631	1.00481	1.02793	0.1708
insomnia	Excitatory_control_CCDC32	Wald ratio	1	-0.0357416	0.0126345	0.004671	-0.0605052	-0.010978	0.96489	0.941289	0.989082	0.1708
insomnia	Excitatory_control_GPR171	Wald ratio	1	-0.0340081	0.0119838	0.004542	-0.0574964	-0.0105199	0.966564	0.944125	0.989535	0.1708
insomnia	Microglia_control_PICALM	Wald ratio	1	-0.0241427	0.00861338	0.005064	-0.041025	-0.00726051	0.976146	0.959805	0.992766	0.1708
insomnia	Excitatory_control_LINC00667	Wald ratio	1	-0.0495152	0.0171682	0.003925	-0.0831649	-0.0158656	0.951691	0.920199	0.98426	0.1708
insomnia	Inhibitory_control_LINC01291	Wald ratio	1	-0.0214236	0.00768531	0.00531	-0.0364868	-0.00636037	0.978804	0.964171	0.99366	0.1708
insomnia	Oligodendrocytes_control_DNA2	Wald ratio	1	0.0436842	0.0158172	0.005748	0.0126825	0.0746858	1.04465	1.01276	1.07755	0.1807
insomnia	Excitatory_control_PRSS55	Wald ratio	1	-0.0210331	0.00765427	0.005998	-0.0360355	-0.00603073	0.979187	0.964606	0.993987	0.1822
insomnia	Inhibitory_control_PRSS55	Wald ratio	1	-0.0208294	0.00758992	0.006063	-0.0357057	-0.00595319	0.979386	0.964924	0.994064	0.1822
insomnia	Microglia_control_PDE4B	Wald ratio	1	-0.0283073	0.0103388	0.006182	-0.0485713	-0.00804325	0.97209	0.952589	0.991989	0.1822
insomnia	Oligodendrocytes_control_FAM131C	Wald ratio	1	-0.0225126	0.00833696	0.006927	-0.038853	-0.00617213	0.977739	0.961892	0.993847	0.1961
insomnia	Excitatory_control_SNX16	Wald ratio	1	0.0696894	0.0258081	0.006928	0.0191054	0.120273	1.07218	1.01929	1.12781	0.1961
insomnia	Excitatory_control_GPR55	Wald ratio	1	0.0313498	0.0116489	0.007119	0.00851796	0.0541816	1.03185	1.00855	1.05568	0.1975
insomnia	Excitatory_control_C20orf96	Wald ratio	1	0.0459371	0.0172074	0.007594	0.0122105	0.0796637	1.04701	1.01229	1.08292	0.2027
insomnia	Astrocytes_control_C20orf96	Wald ratio	1	0.0495945	0.0185363	0.007461	0.0132634	0.0859256	1.05084	1.01335	1.08973	0.2027
insomnia	Oligodendrocytes_control_LHFPL6	Wald ratio	1	0.0187056	0.00704568	0.007933	0.0048961	0.0325152	1.01888	1.00491	1.03305	0.2079
insomnia	Excitatory_control_HLA-DPB1	Wald ratio	1	0.022359	0.00846817	0.008282	0.00576134	0.0389566	1.02261	1.00578	1.03973	0.2131
insomnia	Excitatory_control_COMMD6	Wald ratio	1	-0.0246852	0.00939458	0.008599	-0.0430986	-0.0062718	0.975617	0.957817	0.993748	0.2173
insomnia	Excitatory_control_ST3GAL4	Wald ratio	1	-0.0602245	0.0230342	0.008934	-0.105372	-0.0150775	0.941553	0.89999	0.985036	0.2218
insomnia	Inhibitory_control_COMMD6	Wald ratio	1	-0.0210752	0.0081042	0.009308	-0.0369594	-0.00519098	0.979145	0.963715	0.994822	0.2232
insomnia	Excitatory_control_HLA-DRB1	Wald ratio	1	-0.0197717	0.00759896	0.009271	-0.0346657	-0.00487774	0.980422	0.965928	0.995134	0.2232
insomnia	Astrocytes_control_GMPPB	Wald ratio	1	0.039394	0.0152721	0.009895	0.0094607	0.0693272	1.04018	1.00951	1.07179	0.2334
insomnia	Excitatory_control_SEC23B	Wald ratio	1	0.0697071	0.0271414	0.01022	0.01651	0.122904	1.07219	1.01665	1.13078	0.2371
insomnia	Microglia_control_HLA-DMA	Wald ratio	1	0.0232033	0.00905707	0.01041	0.00545149	0.0409552	1.02347	1.00547	1.04181	0.2376
insomnia	Oligodendrocytes_control_KIAA0930	Wald ratio	1	0.018899	0.00742709	0.01094	0.00434195	0.0334561	1.01908	1.00435	1.03402	0.2408
insomnia	Excitatory_control_ADAL	Wald ratio	1	-0.0411698	0.0161752	0.01092	-0.0728731	-0.00946649	0.959666	0.929719	0.990578	0.2408
insomnia	Oligodendrocytes_control_ADAMTS5	Wald ratio	1	-0.0170562	0.00671292	0.01106	-0.0302135	-0.00389884	0.983088	0.970238	0.996109	0.2408
insomnia	Oligodendrocytes_control_CRTAP	Wald ratio	1	0.0502004	0.019826	0.01134	0.0113413	0.0890594	1.05148	1.01141	1.09315	0.2431
insomnia	Astrocytes_control_PTER	Wald ratio	1	0.0259878	0.010528	0.01357	0.00535295	0.0466227	1.02633	1.00537	1.04773	0.2744
insomnia	Oligodendrocytes_control_CADM2	Wald ratio	1	0.0244314	0.00990276	0.01362	0.00502201	0.0438408	1.02473	1.00503	1.04482	0.2744
insomnia	Endothelial_control_HLA-DMA	Wald ratio	1	0.023607	0.00960302	0.01396	0.0047851	0.0424289	1.02389	1.0048	1.04334	0.2744
insomnia	Oligodendrocytes_control_RGS7	Wald ratio	1	0.0164287	0.00664833	0.01347	0.00339793	0.0294594	1.01656	1.0034	1.0299	0.2744
insomnia	Excitatory_control_LINC01630	Wald ratio	1	0.0368848	0.0149932	0.01389	0.00749805	0.0662715	1.03757	1.00753	1.06852	0.2744
insomnia	Excitatory_control_ZNF253	Wald ratio	1	-0.065835	0.0265148	0.01303	-0.117804	-0.0138659	0.936285	0.88887	0.98623	0.2744
insomnia	Microglia_control_MYO5B	Wald ratio	1	0.0210553	0.00859792	0.01433	0.00420338	0.0379072	1.02128	1.00421	1.03863	0.2778
insomnia	Oligodendrocytes_control_SLC9C2	Wald ratio	1	-0.0238364	0.00977716	0.01477	-0.0429997	-0.00467319	0.976445	0.957912	0.995338	0.2824
insomnia	Excitatory_control_SLX1B	Wald ratio	1	-0.0287026	0.0118224	0.01519	-0.0518744	-0.00553071	0.971705	0.949448	0.994485	0.2866
insomnia	Oligodendrocytes_control_MASTL	Wald ratio	1	0.0377561	0.0158007	0.01687	0.00678684	0.0687254	1.03848	1.00681	1.07114	0.3041
insomnia	Excitatory_control_PADI4	Wald ratio	1	-0.015487	0.00648767	0.01698	-0.0282028	-0.00277115	0.984632	0.972191	0.997233	0.3041
insomnia	Inhibitory_control_STOX1	Wald ratio	1	-0.0374175	0.0156732	0.01697	-0.068137	-0.00669805	0.963274	0.934133	0.993324	0.3041
insomnia	OPCs_control_PTPRJ	Wald ratio	1	0.0234347	0.00980456	0.01684	0.00421775	0.0426516	1.02371	1.00423	1.04357	0.3041
insomnia	Oligodendrocytes_control_PPFIA2	Wald ratio	1	0.0306586	0.0128803	0.0173	0.00541319	0.055904	1.03113	1.00543	1.0575	0.306
insomnia	Excitatory_control_ARL17A	Wald ratio	1	-0.015539	0.00655376	0.01774	-0.0283844	-0.0026936	0.984581	0.972015	0.99731	0.3061
insomnia	Inhibitory_control_ARL17A	Wald ratio	1	-0.0146686	0.00618667	0.01774	-0.0267945	-0.00254273	0.985438	0.973561	0.997461	0.3061
insomnia	Oligodendrocytes_control_ANKRD7	Wald ratio	1	0.0186887	0.00807139	0.02059	0.00286873	0.0345086	1.01886	1.00287	1.03511	0.3084
insomnia	Inhibitory_control_EFHB	Wald ratio	1	0.0160984	0.00699132	0.0213	0.0023954	0.0298014	1.01623	1.0024	1.03025	0.3084
insomnia	Oligodendrocytes_control_OR7C1	Wald ratio	1	-0.0208419	0.00900633	0.02066	-0.0384943	-0.00318951	0.979374	0.962237	0.996816	0.3084
insomnia	Inhibitory_control_COLEC11	Wald ratio	1	-0.0200841	0.0085926	0.01942	-0.0369256	-0.00324258	0.980116	0.963748	0.996763	0.3084
insomnia	Excitatory_control_LPCAT2	Wald ratio	1	-0.0199442	0.00859862	0.02037	-0.0367975	-0.00309088	0.980253	0.963871	0.996914	0.3084
insomnia	Excitatory_control_EFHB	Wald ratio	1	0.0139828	0.00607254	0.0213	0.0020806	0.025885	1.01408	1.00208	1.02622	0.3084
insomnia	Astrocytes_control_ANXA11	Wald ratio	1	-0.0309018	0.0132273	0.01948	-0.0568272	-0.00497631	0.969571	0.944757	0.995036	0.3084
insomnia	Oligodendrocytes_control_ARNT	Wald ratio	1	-0.0536382	0.0232818	0.02123	-0.0992706	-0.00800589	0.947775	0.905498	0.992026	0.3084
insomnia	OPCs_control_LINC01374	Wald ratio	1	-0.0211679	0.00919721	0.02136	-0.0391945	-0.0031414	0.979055	0.961564	0.996864	0.3084
insomnia	OPCs_control_EFHB	Wald ratio	1	0.0189467	0.00822829	0.0213	0.00281921	0.0350741	1.01913	1.00282	1.0357	0.3084
insomnia	Excitatory_control_COLEC11	Wald ratio	1	-0.0181862	0.00778061	0.01942	-0.0334362	-0.00293616	0.981978	0.967117	0.997068	0.3084
insomnia	Inhibitory_control_RAD51C	Wald ratio	1	0.034918	0.014955	0.01955	0.00560623	0.0642297	1.03553	1.00562	1.06634	0.3084
insomnia	OPCs_control_LINC00865	Wald ratio	1	-0.0188647	0.00816729	0.0209	-0.0348726	-0.0028568	0.981312	0.965728	0.997147	0.3084
insomnia	Excitatory_control_ALLC	Wald ratio	1	-0.0147682	0.0063183	0.01942	-0.0271521	-0.00238433	0.98534	0.973213	0.997619	0.3084
insomnia	Oligodendrocytes_control_EFHB	Wald ratio	1	0.0142368	0.00618286	0.0213	0.0021184	0.0263552	1.01434	1.00212	1.02671	0.3084
insomnia	Astrocytes_control_EFHB	Wald ratio	1	0.020553	0.00892592	0.0213	0.00305824	0.0380478	1.02077	1.00306	1.03878	0.3084
insomnia	Excitatory_control_LINC00865	Wald ratio	1	-0.0313517	0.0136751	0.02187	-0.0581549	-0.00454858	0.969135	0.943504	0.995462	0.3126
insomnia	Inhibitory_control_LINC00865	Wald ratio	1	-0.023144	0.0101163	0.02215	-0.042972	-0.00331599	0.977122	0.957938	0.99669	0.3134
insomnia	Excitatory_control_NAGA	Wald ratio	1	0.0396148	0.0173469	0.02239	0.00561493	0.0736146	1.04041	1.00563	1.07639	0.3137
insomnia	Oligodendrocytes_control_GPR180	Wald ratio	1	-0.0262676	0.0115911	0.02344	-0.0489862	-0.00354904	0.974074	0.952194	0.996457	0.3222
insomnia	Excitatory_control_GREB1	Wald ratio	1	0.0318937	0.0140748	0.02345	0.00430719	0.0594802	1.03241	1.00432	1.06128	0.3222
insomnia	Excitatory_control_PAH	Wald ratio	1	-0.0216906	0.00964305	0.02449	-0.040591	-0.00279025	0.978543	0.960222	0.997214	0.3247
insomnia	Oligodendrocytes_control_PRPSAP2	Wald ratio	1	0.0355459	0.0158093	0.02455	0.00455959	0.0665322	1.03619	1.00457	1.0688	0.3247
insomnia	Inhibitory_control_PAH	Wald ratio	1	-0.0301847	0.0134193	0.02449	-0.0564865	-0.00388292	0.970266	0.945079	0.996125	0.3247
insomnia	Excitatory_control_MFSD13A	Wald ratio	1	0.0364225	0.0161799	0.02438	0.00470978	0.0681351	1.03709	1.00472	1.07051	0.3247
insomnia	Oligodendrocytes_control_KCNK1	Wald ratio	1	0.0273639	0.0121983	0.02488	0.00345529	0.0512725	1.02774	1.00346	1.05261	0.326
insomnia	Excitatory_control_MRLN	Wald ratio	1	0.0268935	0.0121215	0.02651	0.00313533	0.0506517	1.02726	1.00314	1.05196	0.341
insomnia	Excitatory_control_LINC02080	Wald ratio	1	0.0200457	0.00902188	0.02629	0.00236284	0.0377286	1.02025	1.00237	1.03845	0.341
insomnia	Oligodendrocytes_control_DDX4	Wald ratio	1	0.0239091	0.0109988	0.02972	0.00235156	0.0454667	1.0242	1.00235	1.04652	0.3447
insomnia	Oligodendrocytes_control_SV2B	Wald ratio	1	0.0186016	0.00841616	0.02709	0.00210588	0.0350972	1.01878	1.00211	1.03572	0.3447
insomnia	OPCs_control_TLR1	Wald ratio	1	0.028096	0.012853	0.02882	0.00290401	0.0532879	1.02849	1.00291	1.05473	0.3447
insomnia	Oligodendrocytes_control_CFAP54	Wald ratio	1	0.0152509	0.00697069	0.02868	0.00158832	0.0289134	1.01537	1.00159	1.02934	0.3447
insomnia	Excitatory_control_RAD51C	Wald ratio	1	0.0213903	0.00973362	0.02798	0.00231238	0.0404682	1.02162	1.00232	1.0413	0.3447
insomnia	Oligodendrocytes_control_INPP1	Wald ratio	1	-0.0330232	0.0150635	0.02836	-0.0625477	-0.0034988	0.967516	0.939368	0.996507	0.3447
insomnia	Excitatory_control_CCAR2	Wald ratio	1	0.0505394	0.0229685	0.02778	0.00552114	0.0955576	1.05184	1.00554	1.10027	0.3447
insomnia	Oligodendrocytes_control_ADGRE2	Wald ratio	1	-0.0292532	0.0133201	0.02808	-0.0553607	-0.00314577	0.971171	0.946144	0.996859	0.3447
insomnia	Astrocytes_control_ABLIM3	Wald ratio	1	-0.0150005	0.00689719	0.02964	-0.028519	-0.00148199	0.985111	0.971884	0.998519	0.3447
insomnia	Excitatory_control_INPP1	Wald ratio	1	-0.0212296	0.00972825	0.02909	-0.040297	-0.00216225	0.978994	0.960504	0.99784	0.3447
insomnia	Oligodendrocytes_control_TMEM220	Wald ratio	1	0.0238829	0.0109773	0.02958	0.00236746	0.0453984	1.02417	1.00237	1.04644	0.3447
insomnia	Excitatory_control_P2RX2	Wald ratio	1	-0.0270331	0.012254	0.02738	-0.051051	-0.00301519	0.973329	0.95023	0.996989	0.3447
insomnia	Inhibitory_control_SLC25A24	Wald ratio	1	-0.0248637	0.0114762	0.03027	-0.0473571	-0.00237029	0.975443	0.953747	0.997633	0.3463
insomnia	Oligodendrocytes_control_ODAPH	Wald ratio	1	-0.022911	0.01058	0.03035	-0.0436479	-0.00217412	0.977349	0.957291	0.997828	0.3463
insomnia	Endothelial_control_PCSK4	Wald ratio	1	0.0193293	0.00893948	0.0306	0.00180788	0.0368506	1.01952	1.00181	1.03754	0.3464
insomnia	Excitatory_control_LRRC69	Wald ratio	1	-0.0395961	0.0183553	0.03099	-0.0755726	-0.00361969	0.961178	0.927212	0.996387	0.348
insomnia	Astrocytes_control_MXRA7	Wald ratio	1	0.0404412	0.018827	0.03171	0.00354036	0.077342	1.04127	1.00355	1.08041	0.3512
insomnia	Excitatory_control_PWP2	Wald ratio	1	0.0116111	0.00540732	0.03177	0.00101275	0.0222095	1.01168	1.00101	1.02246	0.3512
insomnia	Inhibitory_control_SIGIRR	Wald ratio	1	-0.0228922	0.0106815	0.0321	-0.0438279	-0.00195645	0.977368	0.957119	0.998045	0.3521
insomnia	Oligodendrocytes_control_NPIPB13	Wald ratio	1	-0.0273419	0.0128619	0.03352	-0.0525513	-0.0021325	0.973028	0.948806	0.99787	0.3621
insomnia	Oligodendrocytes_control_CCDC82	Wald ratio	1	-0.0150815	0.00709331	0.03349	-0.0289844	-0.00117862	0.985032	0.971432	0.998822	0.3621
insomnia	Inhibitory_control_PSMD13	Wald ratio	1	-0.0447064	0.0211308	0.03437	-0.0861227	-0.00329014	0.956278	0.917482	0.996715	0.366
insomnia	Pericytes_control_KANSL1	Wald ratio	1	-0.0114408	0.00543174	0.03518	-0.022087	-0.000794558	0.988624	0.978155	0.999206	0.366
insomnia	Inhibitory_control_INPP1	Wald ratio	1	-0.0222921	0.0105709	0.03496	-0.0430111	-0.00157318	0.977955	0.957901	0.998428	0.366
insomnia	Oligodendrocytes_control_PPM1K-DT	Wald ratio	1	0.0127591	0.00605301	0.03504	0.000895215	0.024623	1.01284	1.0009	1.02493	0.366
insomnia	Inhibitory_control_PPM1K-DT	Wald ratio	1	0.0213446	0.010126	0.03504	0.0014976	0.0411916	1.02157	1.0015	1.04205	0.366
insomnia	Excitatory_control_CCDC127	Wald ratio	1	-0.0442635	0.0210471	0.03546	-0.0855159	-0.00301113	0.956702	0.918039	0.996993	0.3662
insomnia	OPCs_control_LINC02552	Wald ratio	1	0.0157249	0.0075115	0.03631	0.00100233	0.0304474	1.01585	1.001	1.03092	0.3723
insomnia	Astrocytes_control_KANSL1	Wald ratio	1	-0.0100066	0.00481173	0.03756	-0.0194376	-0.000575601	0.990043	0.98075	0.999425	0.3743
insomnia	Excitatory_control_LRRC37A2	Wald ratio	1	-0.0122191	0.00585649	0.03694	-0.0236978	-0.000740415	0.987855	0.976581	0.99926	0.3743
insomnia	Excitatory_control_KANSL1	Wald ratio	1	-0.0101361	0.00487401	0.03756	-0.0196892	-0.000583051	0.989915	0.980503	0.999417	0.3743
insomnia	OPCs_control_KANSL1	Wald ratio	1	-0.00958051	0.00460685	0.03756	-0.0186099	-0.000551091	0.990465	0.981562	0.999449	0.3743
insomnia	Inhibitory_control_DPH1	Wald ratio	1	0.0291939	0.0141242	0.03874	0.00151042	0.0568774	1.02962	1.00151	1.05853	0.3806
insomnia	Oligodendrocytes_control_JPH1	Wald ratio	1	-0.0132249	0.00641633	0.03929	-0.0258009	-0.000648926	0.986862	0.974529	0.999351	0.3806
insomnia	Microglia_control_PWP2	Wald ratio	1	0.0120159	0.00583714	0.03954	0.00057509	0.0234567	1.01209	1.00058	1.02373	0.3806
insomnia	Astrocytes_control_PWP2	Wald ratio	1	0.0128081	0.00622198	0.03954	0.000613006	0.0250032	1.01289	1.00061	1.02532	0.3806
insomnia	Excitatory_control_GUCA1B	Wald ratio	1	-0.0196478	0.00950476	0.03872	-0.0382771	-0.00101844	0.980544	0.962446	0.998982	0.3806
insomnia	Excitatory_control_CCDC82	Wald ratio	1	-0.0226681	0.0110568	0.04035	-0.0443394	-0.000996747	0.977587	0.956629	0.999004	0.3832
insomnia	Inhibitory_control_CCDC82	Wald ratio	1	-0.0238063	0.011612	0.04035	-0.0465659	-0.0010468	0.976475	0.954502	0.998954	0.3832
insomnia	Excitatory_control_FARP2	Wald ratio	1	0.0538112	0.0263051	0.04079	0.00225325	0.105369	1.05529	1.00226	1.11112	0.3848
insomnia	Excitatory_control_ABO	Wald ratio	1	0.0204349	0.0100895	0.04283	0.00065949	0.0402103	1.02065	1.00066	1.04103	0.4014
insomnia	Excitatory_control_TPH1	Wald ratio	1	0.0189071	0.00937942	0.04382	0.000523452	0.0372908	1.01909	1.00052	1.03799	0.4032
insomnia	Astrocytes_control_DDX31	Wald ratio	1	-0.0396525	0.0197293	0.04445	-0.0783219	-0.000982961	0.961123	0.924667	0.999018	0.4032
insomnia	Inhibitory_control_TMCO3	Wald ratio	1	0.0447683	0.0222097	0.04383	0.00123737	0.0882993	1.04579	1.00124	1.09232	0.4032
insomnia	Excitatory_control_LINC01374	Wald ratio	1	-0.0246664	0.0122712	0.04442	-0.048718	-0.000614858	0.975635	0.95245	0.999385	0.4032
insomnia	Excitatory_control_DPY19L4	Wald ratio	1	0.0439453	0.0218385	0.04419	0.00114181	0.0867488	1.04493	1.00114	1.09062	0.4032
insomnia	Excitatory_control_PSMB5	Wald ratio	1	-0.0309038	0.0154189	0.04504	-0.0611249	-0.000682761	0.969569	0.940706	0.999317	0.4059
insomnia	Astrocytes_control_FAM89A	Wald ratio	1	-0.0176883	0.00884334	0.04548	-0.0350213	-0.000355393	0.982467	0.965585	0.999645	0.4069
insomnia	OPCs_control_COL19A1	Wald ratio	1	-0.0193994	0.00974129	0.04643	-0.0384924	-0.000306491	0.980788	0.962239	0.999694	0.4069
insomnia	Oligodendrocytes_control_ADGRB3	Wald ratio	1	0.0161894	0.00818773	0.04801	0.000141483	0.0322374	1.01632	1.00014	1.03276	0.4069
insomnia	Astrocytes_control_SPATA6L	Wald ratio	1	-0.0242764	0.0122291	0.04713	-0.0482455	-0.000307319	0.976016	0.9529	0.999693	0.4069
insomnia	Excitatory_control_LINC02145	Wald ratio	1	-0.0265829	0.0134448	0.04802	-0.0529346	-0.000231134	0.973767	0.948442	0.999769	0.4069
insomnia	Inhibitory_control_BICC1	Wald ratio	1	0.0161252	0.00811856	0.04701	0.000212788	0.0320375	1.01626	1.00021	1.03256	0.4069
insomnia	Excitatory_control_MEIOB	Wald ratio	1	0.0346861	0.0174444	0.04677	0.000495023	0.0688772	1.03529	1.0005	1.0713	0.4069
insomnia	Excitatory_control_MOV10	Wald ratio	1	-0.0300644	0.0151585	0.04733	-0.059775	-0.000353726	0.970383	0.941976	0.999646	0.4069
insomnia	Astrocytes_control_LINC01354	Wald ratio	1	-0.0201376	0.0101745	0.04779	-0.0400796	-0.000195666	0.980064	0.960713	0.999804	0.4069
insomnia	Excitatory_control_TRHR	Wald ratio	1	0.0291768	0.0146897	0.04701	0.000385018	0.0579685	1.02961	1.00039	1.05968	0.4069
insomnia	Endothelial_control_SMAD4	Wald ratio	1	0.0176994	0.00896937	0.04846	0.000119402	0.0352793	1.01786	1.00012	1.03591	0.4082
insomnia	Excitatory_control_C15orf40	Wald ratio	1	-0.0262753	0.0133843	0.04963	-0.0525085	-4.20162e-05	0.974067	0.948846	0.999958	0.4107
insomnia	Excitatory_control_OR2T10	Wald ratio	1	0.0202716	0.010308	0.04923	6.7974e-05	0.0404753	1.02048	1.00007	1.04131	0.4107
insomnia	Excitatory_control_CCDC141	Wald ratio	1	0.0187568	0.00955242	0.04958	3.41004e-05	0.0374796	1.01893	1.00003	1.03819	0.4107
insomnia	Excitatory_control_VPS53	Wald ratio	1	0.0352667	0.0180053	0.05015	-2.37249e-05	0.0705571	1.0359	0.999976	1.07311	0.4126
insomnia	Excitatory_control_DPH1	Wald ratio	1	0.0207847	0.0106512	0.05101	-9.16469e-05	0.0416611	1.021	0.999908	1.04254	0.4148
insomnia	Oligodendrocytes_control_DPH1	Wald ratio	1	0.0226998	0.0116326	0.05101	-0.000100091	0.0454996	1.02296	0.9999	1.04655	0.4148
insomnia	OPCs_control_SPATA6L	Wald ratio	1	0.0261681	0.0134704	0.05206	-0.000233883	0.0525701	1.02651	0.999766	1.05398	0.4209
insomnia	Excitatory_control_PCNX4	Wald ratio	1	0.0212152	0.0109375	0.05242	-0.000222377	0.0426527	1.02144	0.999778	1.04358	0.4214
insomnia	Oligodendrocytes_control_SLC25A24	Wald ratio	1	-0.0254448	0.0132967	0.05567	-0.0515064	0.000616835	0.974876	0.949798	1.00062	0.4288
insomnia	Astrocytes_control_TBC1D31	Wald ratio	1	-0.0318275	0.0166295	0.05563	-0.0644212	0.000766236	0.968674	0.93761	1.00077	0.4288
insomnia	Astrocytes_control_KNOP1	Wald ratio	1	0.0131904	0.00708282	0.06256	-0.00069195	0.0270727	1.01328	0.999308	1.02744	0.4288
insomnia	Excitatory_control_AIFM2	Wald ratio	1	-0.0271485	0.0141259	0.05462	-0.0548353	0.000538385	0.973217	0.946641	1.00054	0.4288
insomnia	Oligodendrocytes_control_LRRIQ3	Wald ratio	1	0.022683	0.0121134	0.06113	-0.00105927	0.0464253	1.02294	0.998941	1.04752	0.4288
insomnia	Inhibitory_control_TPPP2	Wald ratio	1	0.0103544	0.00561155	0.06501	-0.000644266	0.021353	1.01041	0.999356	1.02158	0.4288
insomnia	Excitatory_control_MRPS18C	Wald ratio	1	-0.0371618	0.0201233	0.06479	-0.0766034	0.00227988	0.96352	0.926257	1.00228	0.4288
insomnia	Excitatory_control_KNOP1	Wald ratio	1	0.0194293	0.0104329	0.06256	-0.00101924	0.0398779	1.01962	0.998981	1.04068	0.4288
insomnia	Excitatory_control_LRRIQ3	Wald ratio	1	0.0193221	0.0102149	0.05855	-0.000699136	0.0393433	1.01951	0.999301	1.04013	0.4288
insomnia	Excitatory_control_TDRD5	Wald ratio	1	0.0188198	0.0101948	0.06489	-0.00116205	0.0388016	1.019	0.998839	1.03956	0.4288
insomnia	Excitatory_control_SLC25A24	Wald ratio	1	-0.0235728	0.0123185	0.05567	-0.0477171	0.000571455	0.976703	0.953403	1.00057	0.4288
insomnia	Excitatory_control_MGAM	Wald ratio	1	-0.0164379	0.00885515	0.06341	-0.033794	0.000918229	0.983697	0.966771	1.00092	0.4288
insomnia	Excitatory_control_FUT10	Wald ratio	1	-0.0297955	0.0159559	0.06185	-0.0610691	0.001478	0.970644	0.940758	1.00148	0.4288
insomnia	Excitatory_control_LINC01117	Wald ratio	1	-0.0242837	0.0128537	0.05886	-0.049477	0.000909559	0.976009	0.951727	1.00091	0.4288
insomnia	OPCs_control_PWP2	Wald ratio	1	0.0144603	0.00761853	0.05769	-0.000471997	0.0293926	1.01457	0.999528	1.02983	0.4288
insomnia	OPCs_control_PPM1K-DT	Wald ratio	1	0.0132066	0.00711661	0.06349	-0.000741946	0.0271552	1.01329	0.999258	1.02753	0.4288
insomnia	Excitatory_control_MSH3	Wald ratio	1	-0.0544792	0.0287601	0.05819	-0.110849	0.00189058	0.946978	0.895074	1.00189	0.4288
insomnia	Oligodendrocytes_control_PRAG1	Wald ratio	1	-0.0172142	0.0093122	0.06452	-0.0354662	0.00103766	0.982933	0.965155	1.00104	0.4288
insomnia	Astrocytes_control_LRRC37A2	Wald ratio	1	-0.0133537	0.00719775	0.06356	-0.0274613	0.000753938	0.986735	0.972912	1.00075	0.4288
insomnia	Astrocytes_control_LRRC37A	Wald ratio	1	-0.0149535	0.0080601	0.06356	-0.0307513	0.000844265	0.985158	0.969717	1.00084	0.4288
insomnia	Excitatory_control_SRR	Wald ratio	1	0.035673	0.01906	0.06126	-0.00168464	0.0730306	1.03632	0.998317	1.07576	0.4288
insomnia	Excitatory_control_FAM153A	Wald ratio	1	0.0242902	0.0126492	0.05482	-0.00050217	0.0490825	1.02459	0.999498	1.05031	0.4288
insomnia	Inhibitory_control_TDRD5	Wald ratio	1	0.0157757	0.00854579	0.06489	-0.00097409	0.0325254	1.0159	0.999026	1.03306	0.4288
insomnia	Inhibitory_control_KANSL1	Wald ratio	1	-0.00780167	0.00420517	0.06356	-0.0160438	0.000440476	0.992229	0.984084	1.00044	0.4288
insomnia	Excitatory_control_PPM1K-DT	Wald ratio	1	0.0256981	0.0138479	0.06349	-0.00144372	0.05284	1.02603	0.998557	1.05426	0.4288
insomnia	Astrocytes_control_PPM1K-DT	Wald ratio	1	0.0128173	0.00690684	0.06349	-0.000720076	0.0263547	1.0129	0.99928	1.02671	0.4288
insomnia	Excitatory_control_HLA-DQA1	Wald ratio	1	-0.0163282	0.00874667	0.06193	-0.0334717	0.000815219	0.983804	0.967082	1.00082	0.4288
insomnia	Excitatory_control_CTSS	Wald ratio	1	0.0243011	0.0128339	0.05829	-0.000853317	0.0494555	1.0246	0.999147	1.0507	0.4288
insomnia	Inhibitory_control_HSD17B13	Wald ratio	1	-0.0186228	0.0098694	0.05917	-0.0379669	0.000721176	0.981549	0.962745	1.00072	0.4288
insomnia	Excitatory_control_LINC01116	Wald ratio	1	-0.0135635	0.00717934	0.05886	-0.027635	0.000508027	0.986528	0.972743	1.00051	0.4288
insomnia	Oligodendrocytes_control_FAM184B	Wald ratio	1	0.0331343	0.0174403	0.05745	-0.00104866	0.0673173	1.03369	0.998952	1.06963	0.4288
insomnia	OPCs_control_KNOP1	Wald ratio	1	0.0143362	0.00777353	0.06515	-0.000899962	0.0295723	1.01444	0.9991	1.03001	0.4288
insomnia	Inhibitory_control_FAM153A	Wald ratio	1	0.012802	0.00666668	0.05482	-0.000264667	0.0258687	1.01288	0.999735	1.02621	0.4288
insomnia	Oligodendrocytes_control_CCDC15	Wald ratio	1	-0.0250938	0.013421	0.06152	-0.051399	0.00121139	0.975218	0.9499	1.00121	0.4288
insomnia	Inhibitory_control_MGAM	Wald ratio	1	-0.020801	0.0109042	0.05644	-0.0421732	0.000571131	0.979414	0.958704	1.00057	0.4288
insomnia	Excitatory_control_HSD17B13	Wald ratio	1	-0.0137071	0.00726425	0.05917	-0.027945	0.000530813	0.986386	0.972442	1.00053	0.4288
insomnia	Excitatory_control_WBP2NL	Wald ratio	1	0.0305117	0.0160095	0.05667	-0.000866955	0.0618903	1.03098	0.999133	1.06385	0.4288
insomnia	Microglia_control_LRRC4C	Wald ratio	1	0.019012	0.0100761	0.05918	-0.000737026	0.0387611	1.01919	0.999263	1.03952	0.4288
insomnia	Endothelial_control_KANSL1	Wald ratio	1	-0.0103463	0.00557677	0.06356	-0.0212768	0.000584146	0.989707	0.978948	1.00058	0.4288
insomnia	Microglia_control_TECTB	Wald ratio	1	0.0163666	0.00888937	0.0656	-0.00105653	0.0337898	1.0165	0.998944	1.03437	0.4297
insomnia	Excitatory_control_NES	Wald ratio	1	-0.0178514	0.00974881	0.06708	-0.0369591	0.00125625	0.982307	0.963716	1.00126	0.435
insomnia	OPCs_control_ANKRD18B	Wald ratio	1	-0.018125	0.00990728	0.06733	-0.0375433	0.00129325	0.982038	0.963153	1.00129	0.435
insomnia	Oligodendrocytes_control_PRKCA	Wald ratio	1	-0.0139286	0.0076007	0.06687	-0.028826	0.000968733	0.986168	0.971586	1.00097	0.435
insomnia	Excitatory_control_TSGA10	Wald ratio	1	0.0212841	0.0116616	0.06798	-0.00157269	0.0441409	1.02151	0.998429	1.04513	0.4372
insomnia	Excitatory_control_FAM114A2	Wald ratio	1	0.0206625	0.0114415	0.07093	-0.00176285	0.0430879	1.02088	0.998239	1.04403	0.4376
insomnia	Oligodendrocytes_control_AIFM2	Wald ratio	1	-0.0296212	0.0165162	0.0729	-0.061993	0.00275068	0.970813	0.939889	1.00275	0.4376
insomnia	Endothelial_control_UMODL1	Wald ratio	1	0.014164	0.00786664	0.07178	-0.00125464	0.0295826	1.01426	0.998746	1.03002	0.4376
insomnia	Excitatory_control_LINC01114	Wald ratio	1	-0.0281896	0.015529	0.06948	-0.0586265	0.00224727	0.972204	0.943059	1.00225	0.4376
insomnia	Excitatory_control_NBPF3	Wald ratio	1	0.0265477	0.0146209	0.06941	-0.00210918	0.0552047	1.0269	0.997893	1.05676	0.4376
insomnia	Astrocytes_control_KLRC1	Wald ratio	1	-0.0123889	0.00679852	0.06841	-0.025714	0.000936179	0.987688	0.974614	1.00094	0.4376
insomnia	Excitatory_control_ZP3	Wald ratio	1	0.0225298	0.0124285	0.06987	-0.00183007	0.0468897	1.02279	0.998172	1.04801	0.4376
insomnia	Astrocytes_control_BEST1	Wald ratio	1	-0.0231707	0.0129232	0.07298	-0.0485001	0.00215874	0.977096	0.952657	1.00216	0.4376
insomnia	Excitatory_control_COQ5	Wald ratio	1	0.051293	0.0285251	0.07215	-0.0046162	0.107202	1.05263	0.995394	1.11316	0.4376
insomnia	Excitatory_control_KLRC2	Wald ratio	1	-0.0142195	0.00789191	0.07158	-0.0296876	0.00124866	0.985881	0.970749	1.00125	0.4376
insomnia	Microglia_control_CYP27A1	Wald ratio	1	0.0135953	0.0075207	0.07065	-0.00114525	0.0283359	1.01369	0.998855	1.02874	0.4376
insomnia	Inhibitory_control_HLA-C	Wald ratio	1	-0.0172497	0.00959766	0.07229	-0.0360612	0.00156166	0.982898	0.964581	1.00156	0.4376
insomnia	Inhibitory_control_ANKRD18B	Wald ratio	1	-0.0136322	0.00759497	0.07267	-0.0285184	0.00125395	0.98646	0.971884	1.00125	0.4376
insomnia	Microglia_control_ASPRV1	Wald ratio	1	-0.0150228	0.00830325	0.07041	-0.0312972	0.0012516	0.98509	0.969188	1.00125	0.4376
insomnia	Excitatory_control_MYLK4	Wald ratio	1	0.0331983	0.0183927	0.07108	-0.0028515	0.069248	1.03376	0.997153	1.0717	0.4376
insomnia	Microglia_control_OSBP2	Wald ratio	1	-0.0168045	0.00926153	0.06961	-0.0349571	0.00134811	0.983336	0.965647	1.00135	0.4376
insomnia	Astrocytes_control_DNAH7	Wald ratio	1	-0.0161808	0.00914178	0.07673	-0.0340987	0.00173709	0.983949	0.966476	1.00174	0.4532
insomnia	Excitatory_control_OR10H5	Wald ratio	1	-0.0151346	0.00855129	0.07675	-0.0318951	0.00162592	0.984979	0.968608	1.00163	0.4532
insomnia	Inhibitory_control_KLRC1	Wald ratio	1	-0.0132882	0.007493	0.07616	-0.0279745	0.00139808	0.9868	0.972413	1.0014	0.4532
insomnia	Excitatory_control_TTF2	Wald ratio	1	0.0309121	0.0174729	0.07687	-0.00333483	0.065159	1.03139	0.996671	1.06733	0.4532
insomnia	Astrocytes_control_DNAJC6	Wald ratio	1	-0.023767	0.0134646	0.07754	-0.0501576	0.0026237	0.976513	0.951079	1.00263	0.4534
insomnia	Excitatory_control_BSPRY	Wald ratio	1	-0.022034	0.0124824	0.07753	-0.0464996	0.00243157	0.978207	0.954565	1.00243	0.4534
insomnia	Oligodendrocytes_control_WFIKKN1	Wald ratio	1	-0.0205428	0.0116881	0.07882	-0.0434515	0.00236598	0.979667	0.957479	1.00237	0.459
insomnia	Excitatory_control_XKR9	Wald ratio	1	-0.015987	0.00911608	0.07948	-0.0338545	0.00188054	0.98414	0.966712	1.00188	0.459
insomnia	Inhibitory_control_XKR9	Wald ratio	1	-0.0188886	0.0107707	0.07948	-0.0399991	0.00222186	0.981289	0.96079	1.00222	0.459
insomnia	Inhibitory_control_PPFIA1	Wald ratio	1	-0.0404444	0.0232812	0.08235	-0.0860756	0.00518681	0.960363	0.917525	1.0052	0.4594
insomnia	Inhibitory_control_MFSD13A	Wald ratio	1	0.032368	0.0186394	0.08247	-0.00416534	0.0689013	1.0329	0.995843	1.07133	0.4594
insomnia	Oligodendrocytes_control_SLC38A9	Wald ratio	1	0.025824	0.0148691	0.08243	-0.00331941	0.0549673	1.02616	0.996686	1.05651	0.4594
insomnia	Oligodendrocytes_control_CEP192	Wald ratio	1	-0.0430376	0.0247287	0.08179	-0.0915058	0.00543058	0.957875	0.912556	1.00545	0.4594
insomnia	Excitatory_control_PRPH2	Wald ratio	1	-0.0250679	0.0143715	0.08111	-0.0532361	0.0031002	0.975244	0.948156	1.00311	0.4594
insomnia	Excitatory_control_EFCAB2	Wald ratio	1	0.0204299	0.0116774	0.0802	-0.00245778	0.0433175	1.02064	0.997545	1.04427	0.4594
insomnia	Inhibitory_control_C12orf60	Wald ratio	1	-0.0228584	0.0130931	0.08084	-0.0485209	0.00280412	0.977401	0.952637	1.00281	0.4594
insomnia	Astrocytes_control_MGAM	Wald ratio	1	-0.0225194	0.0129528	0.08211	-0.047907	0.00286811	0.977732	0.953222	1.00287	0.4594
insomnia	Excitatory_control_FAM184B	Wald ratio	1	0.0253673	0.0144933	0.08007	-0.00303953	0.0537741	1.02569	0.996965	1.05525	0.4594
insomnia	Excitatory_control_CCDC93	Wald ratio	1	-0.0217248	0.0125296	0.08294	-0.0462827	0.00283323	0.97851	0.954772	1.00284	0.4602
insomnia	Astrocytes_control_WFIKKN1	Wald ratio	1	-0.0223221	0.0129129	0.08387	-0.0476315	0.00298728	0.977925	0.953485	1.00299	0.4636
insomnia	Astrocytes_control_SAMD5	Wald ratio	1	-0.0175195	0.0101762	0.08514	-0.0374649	0.0024259	0.982633	0.963228	1.00243	0.4688
insomnia	Excitatory_control_PPFIA1	Wald ratio	1	-0.0174797	0.0102076	0.08682	-0.0374867	0.00252725	0.982672	0.963207	1.00253	0.4762
insomnia	Oligodendrocytes_control_CD46	Wald ratio	1	0.0349873	0.0204794	0.08756	-0.00515238	0.0751269	1.03561	0.994861	1.07802	0.4784
insomnia	Microglia_control_KANSL1	Wald ratio	1	-0.00950404	0.00559497	0.08938	-0.0204702	0.00146209	0.990541	0.979738	1.00146	0.4793
insomnia	Endothelial_control_AJAP1	Wald ratio	1	0.0128889	0.00759545	0.08971	-0.00199814	0.027776	1.01297	0.998004	1.02817	0.4793
insomnia	Oligodendrocytes_control_KANSL1	Wald ratio	1	-0.00761612	0.00448902	0.08977	-0.0164146	0.00118235	0.992413	0.983719	1.00118	0.4793
insomnia	Inhibitory_control_WBP2NL	Wald ratio	1	0.0296462	0.0174274	0.08892	-0.00451156	0.0638039	1.03009	0.995499	1.06588	0.4793
insomnia	Excitatory_control_CCDC66	Wald ratio	1	0.0215023	0.0126127	0.08823	-0.00321865	0.0462232	1.02174	0.996787	1.04731	0.4793
insomnia	Inhibitory_control_PRPH2	Wald ratio	1	-0.0174896	0.010268	0.08851	-0.037615	0.0026357	0.982662	0.963084	1.00264	0.4793
insomnia	Oligodendrocytes_control_KCNMB4	Wald ratio	1	-0.0148659	0.00878094	0.09046	-0.0320766	0.00234472	0.985244	0.968432	1.00235	0.4812
insomnia	Inhibitory_control_AMH	Wald ratio	1	0.0180325	0.0106929	0.09172	-0.00292566	0.0389907	1.0182	0.997079	1.03976	0.4819
insomnia	Excitatory_control_INTS10	Wald ratio	1	0.0264592	0.0156893	0.09171	-0.00429189	0.0572103	1.02681	0.995717	1.05888	0.4819
insomnia	Astrocytes_control_STEAP2	Wald ratio	1	-0.0243213	0.0144239	0.09176	-0.052592	0.00394945	0.975972	0.948767	1.00396	0.4819
insomnia	Oligodendrocytes_control_MRPS18C	Wald ratio	1	-0.035504	0.0210688	0.09196	-0.0767988	0.00579079	0.965119	0.926076	1.00581	0.4819
insomnia	Excitatory_control_GALM	Wald ratio	1	-0.0206662	0.0123735	0.09488	-0.0449182	0.00358585	0.979546	0.956076	1.00359	0.4954
insomnia	Inhibitory_control_KNOP1	Wald ratio	1	0.0191173	0.0114873	0.09607	-0.0033978	0.0416323	1.0193	0.996608	1.04251	0.4998
insomnia	Inhibitory_control_PWP2	Wald ratio	1	0.0116025	0.00701296	0.09804	-0.00214295	0.0253479	1.01167	0.997859	1.02567	0.5045
insomnia	Oligodendrocytes_control_RABEP1	Wald ratio	1	0.0191241	0.0115431	0.09757	-0.00350045	0.0417486	1.01931	0.996506	1.04263	0.5045
insomnia	Oligodendrocytes_control_PWP2	Wald ratio	1	0.00836187	0.00505423	0.09804	-0.00154442	0.0182682	1.0084	0.998457	1.01844	0.5045
insomnia	Endothelial_control_HLA-DRB5	Wald ratio	1	0.01255	0.00774175	0.105	-0.00262382	0.0277239	1.01263	0.99738	1.02811	0.5052
insomnia	Microglia_control_HLA-DRB5	Wald ratio	1	0.0144758	0.00899636	0.1076	-0.00315705	0.0321087	1.01458	0.996848	1.03263	0.5052
insomnia	Astrocytes_control_SLC25A24	Wald ratio	1	-0.0176073	0.0107988	0.103	-0.0387729	0.00355842	0.982547	0.961969	1.00356	0.5052
insomnia	Astrocytes_control_TAF1C	Wald ratio	1	-0.0258655	0.0160748	0.1076	-0.057372	0.00564104	0.974466	0.944243	1.00566	0.5052
insomnia	Oligodendrocytes_control_ECPAS	Wald ratio	1	-0.0170757	0.0106453	0.1087	-0.0379405	0.00378905	0.983069	0.96277	1.0038	0.5052
insomnia	Oligodendrocytes_control_C9orf72	Wald ratio	1	0.0229908	0.0140801	0.1025	-0.00460628	0.0505878	1.02326	0.995404	1.05189	0.5052
insomnia	Astrocytes_control_CPSF4L	Wald ratio	1	0.0185746	0.0113888	0.1029	-0.00374743	0.0408966	1.01875	0.99626	1.04174	0.5052
insomnia	OPCs_control_NPIPB2	Wald ratio	1	0.00987618	0.00612383	0.1068	-0.00212653	0.0218789	1.00993	0.997876	1.02212	0.5052
insomnia	Excitatory_control_TAF1C	Wald ratio	1	-0.0205624	0.012779	0.1076	-0.0456092	0.00448447	0.979648	0.955415	1.00449	0.5052
insomnia	Excitatory_control_MICB	Wald ratio	1	0.0168861	0.0103505	0.1028	-0.00340088	0.037173	1.01703	0.996605	1.03787	0.5052
insomnia	Excitatory_control_PACRG	Wald ratio	1	-0.0207493	0.0127037	0.1024	-0.0456485	0.00414993	0.979465	0.955378	1.00416	0.5052
insomnia	Oligodendrocytes_control_SLC13A4	Wald ratio	1	-0.0224314	0.013992	0.1089	-0.0498557	0.00499295	0.977818	0.951367	1.00501	0.5052
insomnia	Excitatory_control_SEC22A	Wald ratio	1	-0.0438341	0.0267199	0.1009	-0.0962051	0.00853684	0.957113	0.908278	1.00857	0.5052
insomnia	Inhibitory_control_NPIPB2	Wald ratio	1	0.0115886	0.00718566	0.1068	-0.00249526	0.0256725	1.01166	0.997508	1.026	0.5052
insomnia	Oligodendrocytes_control_STMP1	Wald ratio	1	-0.0261308	0.0162996	0.1089	-0.058078	0.00581639	0.974208	0.943576	1.00583	0.5052
insomnia	Excitatory_control_B3GALT5	Wald ratio	1	0.0303662	0.0188396	0.107	-0.00655948	0.0672918	1.03083	0.993462	1.06961	0.5052
insomnia	OPCs_control_LRRC37A2	Wald ratio	1	-0.0111427	0.00681615	0.1021	-0.0245024	0.0022169	0.988919	0.975795	1.00222	0.5052
insomnia	Astrocytes_control_STMP1	Wald ratio	1	-0.0352851	0.0220098	0.1089	-0.0784242	0.00785403	0.96533	0.924572	1.00788	0.5052
insomnia	Excitatory_control_LINC01068	Wald ratio	1	-0.0189032	0.0117445	0.1075	-0.0419225	0.00411608	0.981274	0.958944	1.00412	0.5052
insomnia	Microglia_control_AADAC	Wald ratio	1	0.0144316	0.00885113	0.103	-0.00291662	0.0317798	1.01454	0.997088	1.03229	0.5052
insomnia	OPCs_control_STMP1	Wald ratio	1	-0.0349425	0.021796	0.1089	-0.0776627	0.00777776	0.965661	0.925276	1.00781	0.5052
insomnia	Oligodendrocytes_control_NPIPB2	Wald ratio	1	0.00826262	0.00512333	0.1068	-0.0017791	0.0183043	1.0083	0.998222	1.01847	0.5052
insomnia	Astrocytes_control_NPIPB2	Wald ratio	1	0.00995867	0.00617498	0.1068	-0.00214429	0.0220616	1.01001	0.997858	1.02231	0.5052
insomnia	Excitatory_control_HDHD3	Wald ratio	1	-0.0208601	0.0129677	0.1077	-0.0462768	0.00455663	0.979356	0.954778	1.00457	0.5052
insomnia	Excitatory_control_NPIPB2	Wald ratio	1	0.009643	0.00597925	0.1068	-0.00207633	0.0213623	1.00969	0.997926	1.02159	0.5052
insomnia	Inhibitory_control_TAF1C	Wald ratio	1	-0.0279632	0.0173784	0.1076	-0.0620249	0.00609853	0.972424	0.939859	1.00612	0.5052
insomnia	Inhibitory_control_LCN15	Wald ratio	1	-0.0120594	0.00733375	0.1001	-0.0264335	0.00231476	0.988013	0.973913	1.00232	0.5052
insomnia	Endothelial_control_SERINC5	Wald ratio	1	-0.01512	0.00943138	0.1089	-0.0336055	0.00336552	0.984994	0.966953	1.00337	0.5052
insomnia	Astrocytes_control_VXN	Wald ratio	1	0.0316628	0.0193798	0.1023	-0.00632161	0.0696472	1.03217	0.993698	1.07213	0.5052
insomnia	Oligodendrocytes_control_TMEM45A	Wald ratio	1	-0.0111716	0.00688152	0.1045	-0.0246594	0.00231619	0.988891	0.975642	1.00232	0.5052
insomnia	Oligodendrocytes_control_ACOT1	Wald ratio	1	0.0123041	0.00768357	0.1093	-0.00275573	0.0273639	1.01238	0.997248	1.02774	0.5054
insomnia	Excitatory_control_NOL6	Wald ratio	1	0.0251737	0.0157868	0.1108	-0.00576836	0.0561158	1.02549	0.994248	1.05772	0.51
insomnia	Excitatory_control_SNX25	Wald ratio	1	0.020815	0.0130607	0.111	-0.00478394	0.0464139	1.02103	0.995227	1.04751	0.51
insomnia	Excitatory_control_MUC6	Wald ratio	1	-0.0235385	0.0149345	0.115	-0.0528102	0.00573319	0.976736	0.94856	1.00575	0.5247
insomnia	OPCs_control_ZNF100	Wald ratio	1	-0.0234255	0.0148915	0.1157	-0.0526128	0.00576179	0.976847	0.948747	1.00578	0.5247
insomnia	OPCs_control_MAP4K4	Wald ratio	1	0.0118993	0.00755395	0.1152	-0.00290642	0.0267051	1.01197	0.997098	1.02706	0.5247
insomnia	Astrocytes_control_ZNF100	Wald ratio	1	-0.0284886	0.0181101	0.1157	-0.0639844	0.00700713	0.971913	0.93802	1.00703	0.5247
insomnia	Excitatory_control_EIF2AK3	Wald ratio	1	-0.0194409	0.0124364	0.118	-0.0438163	0.00493448	0.980747	0.95713	1.00495	0.5251
insomnia	Excitatory_control_NOTUM	Wald ratio	1	-0.0198629	0.0127582	0.1195	-0.044869	0.00514314	0.980333	0.956123	1.00516	0.5251
insomnia	Excitatory_control_CRYGA	Wald ratio	1	0.0200632	0.0128101	0.1173	-0.0050445	0.0451709	1.02027	0.994968	1.04621	0.5251
insomnia	Astrocytes_control_RTN4RL1	Wald ratio	1	-0.0183087	0.0116994	0.1176	-0.0412395	0.00462211	0.981858	0.959599	1.00463	0.5251
insomnia	Excitatory_control_CENPM	Wald ratio	1	0.0115801	0.00742197	0.1187	-0.00296691	0.0261272	1.01165	0.997037	1.02647	0.5251
insomnia	Oligodendrocytes_control_KLRC1	Wald ratio	1	-0.00922109	0.00590679	0.1185	-0.0207984	0.00235621	0.990821	0.979416	1.00236	0.5251
insomnia	OPCs_control_SFMBT2	Wald ratio	1	-0.0222792	0.014287	0.1189	-0.0502817	0.00572326	0.977967	0.950961	1.00574	0.5251
insomnia	Astrocytes_control_ROGDI	Wald ratio	1	0.0179198	0.0115101	0.1195	-0.00463999	0.0404795	1.01808	0.995371	1.04131	0.5251
insomnia	OPCs_control_ARHGAP15	Wald ratio	1	0.0136993	0.00876351	0.118	-0.00347715	0.0308758	1.01379	0.996529	1.03136	0.5251
insomnia	OPCs_control_CCDC32	Wald ratio	1	-0.0248429	0.0158315	0.1166	-0.0558727	0.00618687	0.975463	0.945659	1.00621	0.5251
insomnia	Inhibitory_control_HBS1L	Wald ratio	1	0.0218858	0.0141183	0.1211	-0.00578606	0.0495577	1.02213	0.994231	1.05081	0.5277
insomnia	OPCs_control_RGR	Wald ratio	1	0.0131562	0.00848923	0.1212	-0.00348265	0.0297951	1.01324	0.996523	1.03024	0.5277
insomnia	Excitatory_control_OR3A2	Wald ratio	1	0.0253066	0.016325	0.1211	-0.00669045	0.0573037	1.02563	0.993332	1.05898	0.5277
insomnia	Excitatory_control_CLIC5	Wald ratio	1	0.0185038	0.0119975	0.123	-0.00501133	0.0420189	1.01868	0.995001	1.04291	0.5294
insomnia	Excitatory_control_HCG27	Wald ratio	1	0.0287214	0.0186274	0.1231	-0.00778827	0.0652311	1.02914	0.992242	1.06741	0.5294
insomnia	Oligodendrocytes_control_TBCA	Wald ratio	1	0.0392204	0.0254298	0.123	-0.0106219	0.0890627	1.04	0.989434	1.09315	0.5294
insomnia	Oligodendrocytes_control_ALDH1L2	Wald ratio	1	-0.0167866	0.0108667	0.1224	-0.0380854	0.00451209	0.983353	0.962631	1.00452	0.5294
insomnia	Inhibitory_control_ZNF100	Wald ratio	1	-0.0190523	0.0124782	0.1268	-0.0435097	0.00540504	0.981128	0.957423	1.00542	0.5356
insomnia	Inhibitory_control_LCA5L	Wald ratio	1	0.0177205	0.0115937	0.1264	-0.00500323	0.0404442	1.01788	0.995009	1.04127	0.5356
insomnia	Excitatory_control_ATG10	Wald ratio	1	0.0101939	0.00666064	0.1259	-0.00286093	0.0232488	1.01025	0.997143	1.02352	0.5356
insomnia	Endothelial_control_HLA-DQB1	Wald ratio	1	-0.0104609	0.00682607	0.1254	-0.02384	0.00291817	0.989594	0.976442	1.00292	0.5356
insomnia	Oligodendrocytes_control_ZNF100	Wald ratio	1	-0.0148041	0.00969592	0.1268	-0.0338081	0.00419985	0.985305	0.966757	1.00421	0.5356
insomnia	Oligodendrocytes_control_PYGB	Wald ratio	1	-0.0206321	0.013456	0.1252	-0.0470058	0.00574155	0.979579	0.954082	1.00576	0.5356
insomnia	Excitatory_control_MVB12B	Wald ratio	1	-0.0236774	0.015589	0.1288	-0.0542319	0.00687708	0.976601	0.947212	1.0069	0.5405
insomnia	Astrocytes_control_SLC28A2	Wald ratio	1	-0.0191736	0.012627	0.1289	-0.0439226	0.00557542	0.981009	0.957028	1.00559	0.5405
insomnia	Excitatory_control_ETV7	Wald ratio	1	-0.0138939	0.00915481	0.1291	-0.0318373	0.00404953	0.986202	0.968664	1.00406	0.5405
insomnia	Excitatory_control_SESTD1	Wald ratio	1	-0.0151916	0.0100229	0.1296	-0.0348365	0.00445338	0.984923	0.965763	1.00446	0.541
insomnia	Astrocytes_control_LINC00334	Wald ratio	1	-0.0133738	0.00885811	0.1311	-0.0307357	0.00398812	0.986715	0.969732	1.004	0.544
insomnia	Excitatory_control_ZNF100	Wald ratio	1	-0.0149693	0.00991233	0.131	-0.0343975	0.00445886	0.985142	0.966187	1.00447	0.544
insomnia	Excitatory_control_LINC00299	Wald ratio	1	-0.0210246	0.0141276	0.1367	-0.0487147	0.0066655	0.979195	0.952453	1.00669	0.5553
insomnia	OPCs_control_AKNA	Wald ratio	1	-0.0230182	0.0154791	0.137	-0.0533572	0.00732073	0.977245	0.948041	1.00735	0.5553
insomnia	Oligodendrocytes_control_GRIN2A	Wald ratio	1	-0.00921973	0.00624258	0.1397	-0.0214552	0.00301574	0.990823	0.978773	1.00302	0.5553
insomnia	Oligodendrocytes_control_XKR9	Wald ratio	1	-0.0137134	0.00929458	0.1401	-0.0319308	0.00450398	0.98638	0.968574	1.00451	0.5553
insomnia	Pericytes_control_G6PC2	Wald ratio	1	0.011039	0.00742715	0.1372	-0.00351825	0.0255962	1.0111	0.996488	1.02593	0.5553
insomnia	Inhibitory_control_ATG10	Wald ratio	1	0.0134426	0.00900289	0.1354	-0.00420307	0.0310882	1.01353	0.995806	1.03158	0.5553
insomnia	Astrocytes_control_RPIA	Wald ratio	1	-0.0205905	0.0138711	0.1377	-0.0477779	0.00659696	0.97962	0.953346	1.00662	0.5553
insomnia	Inhibitory_control_HLA-B	Wald ratio	1	0.0177838	0.0120108	0.1387	-0.00575738	0.0413249	1.01794	0.994259	1.04219	0.5553
insomnia	Excitatory_control_SMC2	Wald ratio	1	0.0310438	0.0208335	0.1362	-0.00978981	0.0718774	1.03153	0.990258	1.07452	0.5553
insomnia	Oligodendrocytes_control_MCF2L	Wald ratio	1	0.00806158	0.0053894	0.1347	-0.00250164	0.0186248	1.00809	0.997501	1.0188	0.5553
insomnia	Excitatory_control_ASAH2	Wald ratio	1	0.0212104	0.0143396	0.1391	-0.00689516	0.0493159	1.02144	0.993129	1.05055	0.5553
insomnia	Endothelial_control_ZSCAN31	Wald ratio	1	0.0133667	0.00904132	0.1393	-0.00435427	0.0310877	1.01346	0.995655	1.03158	0.5553
insomnia	Microglia_control_JAZF1	Wald ratio	1	-0.0108487	0.0072824	0.1363	-0.0251222	0.00342483	0.98921	0.975191	1.00343	0.5553
insomnia	Oligodendrocytes_control_CCDC77	Wald ratio	1	-0.0187952	0.0125942	0.1356	-0.0434798	0.0058893	0.98138	0.957452	1.00591	0.5553
insomnia	Inhibitory_control_GSTO2	Wald ratio	1	0.0185328	0.0124976	0.1381	-0.00596257	0.0430281	1.01871	0.994055	1.04397	0.5553
insomnia	Inhibitory_control_RCVRN	Wald ratio	1	0.0146373	0.00990574	0.1395	-0.00477798	0.0340525	1.01474	0.995233	1.03464	0.5553
insomnia	OPCs_control_ATG10	Wald ratio	1	0.0244614	0.0166295	0.1413	-0.00813235	0.0570551	1.02476	0.991901	1.05871	0.5585
insomnia	Excitatory_control_LINC00347	Wald ratio	1	-0.0108162	0.00737896	0.1427	-0.0252789	0.00364661	0.989242	0.975038	1.00365	0.5625
insomnia	Excitatory_control_WFIKKN1	Wald ratio	1	-0.0204379	0.0139605	0.1432	-0.0478004	0.00692472	0.97977	0.953324	1.00695	0.5629
insomnia	Microglia_control_CHST13	Wald ratio	1	-0.0127719	0.00873718	0.1438	-0.0298968	0.00435299	0.987309	0.970546	1.00436	0.5636
insomnia	Oligodendrocytes_control_EXOSC6	Wald ratio	1	0.019615	0.0134922	0.146	-0.00682965	0.0460596	1.01981	0.993194	1.04714	0.5707
insomnia	Excitatory_control_UNC79	Wald ratio	1	0.0181012	0.0125497	0.1492	-0.00649619	0.0426987	1.01827	0.993525	1.04362	0.5776
insomnia	Oligodendrocytes_control_CCDC146	Wald ratio	1	-0.0186414	0.0129306	0.1494	-0.0439853	0.00670251	0.981531	0.956968	1.00673	0.5776
insomnia	Oligodendrocytes_control_TRIM66	Wald ratio	1	0.026551	0.0183989	0.149	-0.0095109	0.0626128	1.02691	0.990534	1.06461	0.5776
insomnia	Excitatory_control_FIGNL1	Wald ratio	1	-0.0246241	0.0170595	0.1489	-0.0580607	0.00881246	0.975677	0.943593	1.00885	0.5776
insomnia	Astrocytes_control_TNFRSF10C	Wald ratio	1	-0.0101202	0.00705437	0.1514	-0.0239468	0.00370634	0.989931	0.976338	1.00371	0.5821
insomnia	Oligodendrocytes_control_LTBP1	Wald ratio	1	0.0105503	0.00735417	0.1514	-0.00386385	0.0249645	1.01061	0.996144	1.02528	0.5821
insomnia	Excitatory_control_GSTO2	Wald ratio	1	0.0131748	0.00919483	0.1519	-0.00484703	0.0311967	1.01326	0.995165	1.03169	0.5825
insomnia	Excitatory_control_LINC02540	Wald ratio	1	0.0155825	0.010907	0.1531	-0.00579526	0.0369602	1.0157	0.994222	1.03765	0.5855
insomnia	Excitatory_control_KLRC1	Wald ratio	1	-0.00952533	0.0066754	0.1536	-0.0226091	0.00355845	0.99052	0.977645	1.00356	0.5858
insomnia	Oligodendrocytes_control_PICK1	Wald ratio	1	-0.0144869	0.0101969	0.1554	-0.0344727	0.00549904	0.985618	0.966115	1.00551	0.5875
insomnia	Astrocytes_control_CCBE1	Wald ratio	1	-0.0113238	0.00796474	0.1551	-0.0269347	0.00428705	0.98874	0.973425	1.0043	0.5875
insomnia	Inhibitory_control_PCOLCE2	Wald ratio	1	-0.0160773	0.0113027	0.1549	-0.0382306	0.00607593	0.984051	0.962491	1.00609	0.5875
insomnia	Excitatory_control_THAP4	Wald ratio	1	0.0320603	0.0225827	0.1557	-0.0122018	0.0763223	1.03258	0.987872	1.07931	0.5875
insomnia	Oligodendrocytes_control_FN3K	Wald ratio	1	0.0132037	0.00933646	0.1573	-0.00509574	0.0315032	1.01329	0.994917	1.032	0.5904
insomnia	Excitatory_control_FN3K	Wald ratio	1	0.0245937	0.0173904	0.1573	-0.00949148	0.0586788	1.0249	0.990553	1.06043	0.5904
insomnia	Astrocytes_control_ARL14EP	Wald ratio	1	-0.0252704	0.0180713	0.162	-0.0606901	0.0101492	0.975046	0.941115	1.0102	0.5919
insomnia	Astrocytes_control_ATP5MC2	Wald ratio	1	0.0258699	0.0185132	0.1623	-0.0104159	0.0621557	1.02621	0.989638	1.06413	0.5919
insomnia	Inhibitory_control_MYO15A	Wald ratio	1	0.0195995	0.0140026	0.1616	-0.00784549	0.0470446	1.01979	0.992185	1.04817	0.5919
insomnia	Astrocytes_control_SAAL1	Wald ratio	1	-0.0203894	0.0145426	0.1609	-0.0488928	0.008114	0.979817	0.952283	1.00815	0.5919
insomnia	Astrocytes_control_DSCC1	Wald ratio	1	0.0195305	0.0138534	0.1586	-0.00762221	0.0466832	1.01972	0.992407	1.04779	0.5919
insomnia	Astrocytes_control_HLA-C	Wald ratio	1	-0.0189968	0.0135817	0.1619	-0.045617	0.00762327	0.981182	0.955408	1.00765	0.5919
insomnia	Microglia_control_ZNF215	Wald ratio	1	-0.00982694	0.00701567	0.1613	-0.0235777	0.00392378	0.990221	0.976698	1.00393	0.5919
insomnia	Oligodendrocytes_control_LINC01098	Wald ratio	1	-0.0122948	0.00874819	0.1599	-0.0294412	0.00485168	0.98778	0.970988	1.00486	0.5919
insomnia	Oligodendrocytes_control_GNPTAB	Wald ratio	1	0.0106987	0.00760703	0.1596	-0.00421111	0.0256084	1.01076	0.995798	1.02594	0.5919
insomnia	Excitatory_control_KNSTRN	Wald ratio	1	-0.0197915	0.0141465	0.1618	-0.0475186	0.00793555	0.980403	0.953593	1.00797	0.5919
insomnia	Microglia_control_LINC02405	Wald ratio	1	-0.0128684	0.00914321	0.1593	-0.0307891	0.00505227	0.987214	0.96968	1.00507	0.5919
insomnia	Oligodendrocytes_control_PPFIBP1	Wald ratio	1	0.00823881	0.00590573	0.163	-0.00333643	0.019814	1.00827	0.996669	1.02001	0.5929
insomnia	Inhibitory_control_ATP5MC2	Wald ratio	1	0.0254152	0.018322	0.1654	-0.010496	0.0613263	1.02574	0.989559	1.06325	0.6001
insomnia	Oligodendrocytes_control_MTRF1L	Wald ratio	1	-0.0240782	0.0173992	0.1664	-0.0581807	0.0100243	0.976209	0.943479	1.01007	0.6007
insomnia	Astrocytes_control_ZNF266	Wald ratio	1	0.0293003	0.0211528	0.166	-0.0121592	0.0707597	1.02973	0.987914	1.07332	0.6007
insomnia	Endothelial_control_LINC01606	Wald ratio	1	-0.00980284	0.00714554	0.1701	-0.0238081	0.00420241	0.990245	0.976473	1.00421	0.6124
insomnia	Oligodendrocytes_control_DOP1A	Wald ratio	1	-0.0165666	0.0121069	0.1712	-0.0402961	0.00716295	0.98357	0.960505	1.00719	0.6133
insomnia	Excitatory_control_RCVRN	Wald ratio	1	0.0106657	0.00779271	0.1711	-0.004608	0.0259394	1.01072	0.995403	1.02628	0.6133
insomnia	Astrocytes_control_EXOSC6	Wald ratio	1	0.024271	0.0177746	0.1721	-0.0105672	0.0591093	1.02457	0.989488	1.06089	0.6134
insomnia	Excitatory_control_TYW3	Wald ratio	1	0.0269841	0.0197615	0.1721	-0.0117485	0.0657167	1.02735	0.98832	1.06792	0.6134
insomnia	Microglia_control_MAP3K13	Wald ratio	1	0.0160386	0.01188	0.177	-0.00724621	0.0393234	1.01617	0.99278	1.04011	0.6171
insomnia	Excitatory_control_GLB1L3	Wald ratio	1	-0.0327242	0.0241665	0.1757	-0.0800906	0.0146422	0.967805	0.923033	1.01475	0.6171
insomnia	Inhibitory_control_CCDC40	Wald ratio	1	0.0309475	0.0229338	0.1772	-0.0140028	0.0758979	1.03143	0.986095	1.07885	0.6171
insomnia	Oligodendrocytes_control_CHRNA5	Wald ratio	1	0.0180893	0.0133742	0.1762	-0.0081242	0.0443028	1.01825	0.991909	1.0453	0.6171
insomnia	Astrocytes_control_ERGIC3	Wald ratio	1	0.0213039	0.0157874	0.1772	-0.00963934	0.0522471	1.02153	0.990407	1.05364	0.6171
insomnia	Microglia_control_SLC18A1	Wald ratio	1	0.00891925	0.0065822	0.1754	-0.00398187	0.0218204	1.00896	0.996026	1.02206	0.6171
insomnia	Excitatory_control_LCA5L	Wald ratio	1	0.0164482	0.0121637	0.1763	-0.00739267	0.0402891	1.01658	0.992635	1.04111	0.6171
insomnia	Excitatory_control_EXT2	Wald ratio	1	-0.0323509	0.0239129	0.1761	-0.0792202	0.0145185	0.968167	0.923836	1.01462	0.6171
insomnia	Oligodendrocytes_control_SLC4A8	Wald ratio	1	-0.0147364	0.0108676	0.1751	-0.036037	0.00656406	0.985372	0.964605	1.00659	0.6171
insomnia	Oligodendrocytes_control_LINC01740	Wald ratio	1	0.00974151	0.007224	0.1775	-0.00441753	0.0239005	1.00979	0.995592	1.02419	0.6171
insomnia	Oligodendrocytes_control_DSCC1	Wald ratio	1	0.0153474	0.0118003	0.1934	-0.00778131	0.0384761	1.01547	0.992249	1.03923	0.6223
insomnia	Excitatory_control_RUBCNL	Wald ratio	1	-0.0176223	0.0135343	0.1929	-0.0441494	0.0089049	0.982532	0.956811	1.00894	0.6223
insomnia	OPCs_control_DSCC1	Wald ratio	1	0.0142398	0.0109488	0.1934	-0.00721976	0.0356994	1.01434	0.992806	1.03634	0.6223
insomnia	Microglia_control_PPP4R3B	Wald ratio	1	-0.0134382	0.0100229	0.18	-0.0330831	0.00620663	0.986652	0.967458	1.00623	0.6223
insomnia	Oligodendrocytes_control_NSF	Wald ratio	1	0.0134892	0.0103065	0.1906	-0.0067115	0.0336898	1.01358	0.993311	1.03426	0.6223
insomnia	Excitatory_control_PLEKHS1	Wald ratio	1	0.0111581	0.00848122	0.1883	-0.00546509	0.0277813	1.01122	0.99455	1.02817	0.6223
insomnia	Inhibitory_control_DBF4B	Wald ratio	1	0.0228783	0.0172363	0.1844	-0.0109049	0.0566615	1.02314	0.989154	1.0583	0.6223
insomnia	Oligodendrocytes_control_LDLRAP1	Wald ratio	1	-0.0143575	0.0109798	0.191	-0.035878	0.00716296	0.985745	0.964758	1.00719	0.6223
insomnia	Oligodendrocytes_control_CNTNAP3	Wald ratio	1	-0.0129374	0.00996967	0.1944	-0.0324779	0.00660319	0.987146	0.968044	1.00663	0.6223
insomnia	Inhibitory_control_TSGA10	Wald ratio	1	0.0131989	0.0100892	0.1908	-0.006576	0.0329738	1.01329	0.993446	1.03352	0.6223
insomnia	Excitatory_control_DSCC1	Wald ratio	1	0.0121553	0.00934601	0.1934	-0.00616289	0.0304735	1.01223	0.993856	1.03094	0.6223
insomnia	Oligodendrocytes_control_CLHC1	Wald ratio	1	0.011215	0.00848589	0.1863	-0.00541735	0.0278473	1.01128	0.994597	1.02824	0.6223
insomnia	Oligodendrocytes_control_DBF4B	Wald ratio	1	0.0188137	0.0144396	0.1926	-0.00948789	0.0471154	1.01899	0.990557	1.04824	0.6223
insomnia	Excitatory_control_ZNF566	Wald ratio	1	0.0104161	0.00789569	0.1871	-0.00505951	0.0258916	1.01047	0.994953	1.02623	0.6223
insomnia	Excitatory_control_CLHC1	Wald ratio	1	-0.0113399	0.00858037	0.1863	-0.0281574	0.00547767	0.988724	0.972235	1.00549	0.6223
insomnia	Excitatory_control_ARHGEF39	Wald ratio	1	-0.0245073	0.0187122	0.1903	-0.0611833	0.0121687	0.975791	0.940651	1.01224	0.6223
insomnia	Microglia_control_LINC02234	Wald ratio	1	-0.00922157	0.00692373	0.1829	-0.0227921	0.00434894	0.990821	0.977466	1.00436	0.6223
insomnia	Oligodendrocytes_control_AGT	Wald ratio	1	0.0168133	0.012942	0.1939	-0.00855299	0.0421796	1.01696	0.991483	1.04308	0.6223
insomnia	Excitatory_control_LINC00290	Wald ratio	1	0.014556	0.0109464	0.1836	-0.00689894	0.0360109	1.01466	0.993125	1.03667	0.6223
insomnia	Inhibitory_control_CLHC1	Wald ratio	1	-0.0152554	0.0115431	0.1863	-0.03788	0.00736908	0.98486	0.962828	1.0074	0.6223
insomnia	Inhibitory_control_DSCC1	Wald ratio	1	0.0133286	0.0102481	0.1934	-0.00675775	0.0334149	1.01342	0.993265	1.03398	0.6223
insomnia	Oligodendrocytes_control_WNT2	Wald ratio	1	-0.0109866	0.00829795	0.1855	-0.0272505	0.00527742	0.989074	0.973117	1.00529	0.6223
insomnia	OPCs_control_CLHC1	Wald ratio	1	0.0178534	0.0135089	0.1863	-0.00862401	0.0443308	1.01801	0.991413	1.04533	0.6223
insomnia	OPCs_control_NSF	Wald ratio	1	0.0195261	0.014919	0.1906	-0.00971515	0.0487673	1.01972	0.990332	1.04998	0.6223
insomnia	Oligodendrocytes_control_LINC01182	Wald ratio	1	0.00898048	0.006772	0.1848	-0.00429264	0.0222536	1.00902	0.995717	1.0225	0.6223
insomnia	Excitatory_control_HLA-C	Wald ratio	1	-0.0176427	0.013395	0.1878	-0.0438969	0.00861143	0.982512	0.957053	1.00865	0.6223
insomnia	Astrocytes_control_TRIM66	Wald ratio	1	0.0203484	0.0153688	0.1855	-0.00977439	0.0504711	1.02056	0.990273	1.05177	0.6223
insomnia	Excitatory_control_TESC	Wald ratio	1	-0.0214794	0.0161824	0.1844	-0.0531969	0.0102381	0.97875	0.948193	1.01029	0.6223
insomnia	Astrocytes_control_CTTNBP2	Wald ratio	1	0.0261097	0.0196126	0.1831	-0.012331	0.0645503	1.02645	0.987745	1.06668	0.6223
insomnia	Endothelial_control_HLA-DRB1	Wald ratio	1	-0.0101141	0.00779056	0.1942	-0.0253836	0.00515537	0.989937	0.974936	1.00517	0.6223
insomnia	Astrocytes_control_RANBP17	Wald ratio	1	0.0170292	0.0129204	0.1875	-0.00829476	0.0423532	1.01718	0.99174	1.04326	0.6223
insomnia	Oligodendrocytes_control_ARL14EP	Wald ratio	1	-0.0298528	0.0227526	0.1895	-0.0744479	0.0147423	0.970588	0.928256	1.01485	0.6223
insomnia	Oligodendrocytes_control_ANKRD18A	Wald ratio	1	-0.0098957	0.00762573	0.1944	-0.0248421	0.00505073	0.990153	0.975464	1.00506	0.6223
insomnia	Excitatory_control_MTRF1L	Wald ratio	1	-0.02854	0.0215606	0.1856	-0.0707988	0.0137189	0.971863	0.931649	1.01381	0.6223
insomnia	Astrocytes_control_FN3K	Wald ratio	1	0.0142832	0.0106458	0.1797	-0.00658252	0.035149	1.01439	0.993439	1.03577	0.6223
insomnia	Excitatory_control_TNFRSF13C	Wald ratio	1	0.0121901	0.00943177	0.1962	-0.00629614	0.0306764	1.01226	0.993724	1.03115	0.6225
insomnia	Excitatory_control_CHRNA5	Wald ratio	1	0.0116397	0.00902804	0.1973	-0.00605527	0.0293347	1.01171	0.993963	1.02977	0.6225
insomnia	Oligodendrocytes_control_CCDC32	Wald ratio	1	-0.0140645	0.0109453	0.1988	-0.0355174	0.00738834	0.986034	0.965106	1.00742	0.6225
insomnia	Inhibitory_control_RAB27A	Wald ratio	1	-0.01858	0.0144755	0.1993	-0.046952	0.00979199	0.981592	0.954133	1.00984	0.6225
insomnia	Excitatory_control_RAB27A	Wald ratio	1	-0.0154546	0.0120405	0.1993	-0.0390539	0.00814481	0.984664	0.961699	1.00818	0.6225
insomnia	Astrocytes_control_GSTT2B	Wald ratio	1	0.0147035	0.0114044	0.1973	-0.00764916	0.0370562	1.01481	0.99238	1.03775	0.6225
insomnia	Excitatory_control_MYOM2	Wald ratio	1	-0.0178593	0.013815	0.1961	-0.0449367	0.00921818	0.982299	0.956058	1.00926	0.6225
insomnia	Oligodendrocytes_control_PIGF	Wald ratio	1	0.0256306	0.0198266	0.1961	-0.0132294	0.0644907	1.02596	0.986858	1.06662	0.6225
insomnia	OPCs_control_RAB27A	Wald ratio	1	-0.0210808	0.0164238	0.1993	-0.0532715	0.0111099	0.97914	0.948123	1.01117	0.6225
insomnia	Oligodendrocytes_control_LINC01299	Wald ratio	1	0.0110114	0.00857698	0.1992	-0.00579946	0.0278223	1.01107	0.994217	1.02821	0.6225
insomnia	Oligodendrocytes_control_RAB27A	Wald ratio	1	-0.0129397	0.0100812	0.1993	-0.0326988	0.00681942	0.987144	0.96783	1.00684	0.6225
insomnia	Excitatory_control_SLC9C2	Wald ratio	1	-0.0210557	0.0164335	0.2001	-0.0532653	0.0111539	0.979164	0.948128	1.01122	0.6235
insomnia	Excitatory_control_GLB1	Wald ratio	1	0.0134653	0.0105187	0.2005	-0.0071514	0.0340821	1.01356	0.992874	1.03467	0.6235
insomnia	Excitatory_control_IMMT	Wald ratio	1	-0.0177186	0.0138628	0.2012	-0.0448898	0.00945251	0.982437	0.956103	1.0095	0.6243
insomnia	Excitatory_control_ACOT1	Wald ratio	1	0.01192	0.00934258	0.202	-0.0063915	0.0302314	1.01199	0.993629	1.03069	0.6247
insomnia	Excitatory_control_HLA-DRB5	Wald ratio	1	-0.0149443	0.0117182	0.2022	-0.0379118	0.00802332	0.985167	0.962798	1.00806	0.6247
insomnia	Excitatory_control_RFPL3	Wald ratio	1	-0.00960059	0.00756312	0.2043	-0.0244243	0.00522312	0.990445	0.975872	1.00524	0.6298
insomnia	OPCs_control_TXNL4B	Wald ratio	1	-0.0151297	0.011932	0.2048	-0.0385163	0.00825698	0.984984	0.962216	1.00829	0.63
insomnia	Excitatory_control_REELD1	Wald ratio	1	0.0135985	0.0108003	0.208	-0.00757012	0.0347672	1.01369	0.992458	1.03538	0.6348
insomnia	Oligodendrocytes_control_CSGALNACT2	Wald ratio	1	0.0176285	0.0140103	0.2083	-0.00983165	0.0450886	1.01778	0.990217	1.04612	0.6348
insomnia	Inhibitory_control_ALG6	Wald ratio	1	0.0173928	0.0138321	0.2086	-0.00971809	0.0445037	1.01754	0.990329	1.04551	0.6348
insomnia	Excitatory_control_CHDH	Wald ratio	1	-0.0195909	0.0155391	0.2074	-0.0500475	0.0108658	0.9806	0.951184	1.01093	0.6348
insomnia	OPCs_control_USP6	Wald ratio	1	-0.0117298	0.00930182	0.2073	-0.0299614	0.00650174	0.988339	0.970483	1.00652	0.6348
insomnia	Oligodendrocytes_control_APPL2	Wald ratio	1	-0.0103226	0.00827072	0.212	-0.0265332	0.00588805	0.989731	0.973816	1.00591	0.641
insomnia	Oligodendrocytes_control_ZSCAN31	Wald ratio	1	0.00967279	0.00774332	0.2116	-0.00550412	0.0248497	1.00972	0.994511	1.02516	0.641
insomnia	Oligodendrocytes_control_WASHC4	Wald ratio	1	-0.0114068	0.00913947	0.212	-0.0293202	0.00650653	0.988658	0.971105	1.00653	0.641
insomnia	Oligodendrocytes_control_ARSI	Wald ratio	1	0.0145685	0.0117033	0.2132	-0.00837006	0.037507	1.01468	0.991665	1.03822	0.6414
insomnia	Excitatory_control_D2HGDH	Wald ratio	1	0.0207902	0.0167782	0.2153	-0.012095	0.0536754	1.02101	0.987978	1.05514	0.6414
insomnia	Inhibitory_control_ZP3	Wald ratio	1	0.015823	0.0127444	0.2144	-0.00915616	0.0408021	1.01595	0.990886	1.04165	0.6414
insomnia	Inhibitory_control_GAL3ST2	Wald ratio	1	0.0100466	0.00810779	0.2153	-0.00584472	0.0259378	1.0101	0.994172	1.02628	0.6414
insomnia	Astrocytes_control_CBS	Wald ratio	1	0.0138815	0.0111588	0.2135	-0.00798968	0.0357526	1.01398	0.992042	1.0364	0.6414
insomnia	Astrocytes_control_GAL3ST2	Wald ratio	1	0.0111696	0.00901414	0.2153	-0.00649809	0.0288373	1.01123	0.993523	1.02926	0.6414
insomnia	Microglia_control_APIP	Wald ratio	1	0.0104771	0.00842949	0.2139	-0.00604468	0.0269989	1.01053	0.993974	1.02737	0.6414
insomnia	Oligodendrocytes_control_ALDH8A1	Wald ratio	1	0.00790894	0.00640775	0.2171	-0.00465026	0.0204681	1.00794	0.995361	1.02068	0.6454
insomnia	Excitatory_control_ALOX15	Wald ratio	1	-0.0105954	0.00863288	0.2197	-0.0275158	0.00632509	0.989461	0.972859	1.00635	0.6517
insomnia	Oligodendrocytes_control_EPB41L4A	Wald ratio	1	-0.0118696	0.00968368	0.2203	-0.0308496	0.00711043	0.988201	0.969621	1.00714	0.6521
insomnia	Excitatory_control_POMC	Wald ratio	1	0.0106764	0.00874239	0.222	-0.00645864	0.0278115	1.01073	0.993562	1.0282	0.6558
insomnia	Endothelial_control_SLC1A7	Wald ratio	1	0.00760768	0.00624033	0.2228	-0.00462335	0.0198387	1.00764	0.995387	1.02004	0.6568
insomnia	Astrocytes_control_FSTL5	Wald ratio	1	0.0109799	0.00901814	0.2234	-0.00669563	0.0286555	1.01104	0.993327	1.02907	0.6572
insomnia	Excitatory_control_ADD3	Wald ratio	1	-0.0181103	0.0149292	0.2251	-0.0473717	0.011151	0.982053	0.953733	1.01121	0.6608
insomnia	Excitatory_control_HDDC2	Wald ratio	1	0.0191236	0.0158872	0.2287	-0.0120153	0.0502626	1.01931	0.988057	1.05155	0.6686
insomnia	Oligodendrocytes_control_NMRAL1	Wald ratio	1	0.0219742	0.0182475	0.2285	-0.0137909	0.0577393	1.02222	0.986304	1.05944	0.6686
insomnia	Astrocytes_control_PLD5	Wald ratio	1	0.00685249	0.00570136	0.2294	-0.00432216	0.0180271	1.00688	0.995687	1.01819	0.6693
insomnia	Excitatory_control_AGBL3	Wald ratio	1	0.0208184	0.0173621	0.2305	-0.0132113	0.0548481	1.02104	0.986876	1.05638	0.6711
insomnia	Excitatory_control_DYTN	Wald ratio	1	-0.0146115	0.0122485	0.2329	-0.0386187	0.00939558	0.985495	0.962118	1.00944	0.6767
insomnia	OPCs_control_MAEL	Wald ratio	1	0.0112883	0.00953176	0.2363	-0.00739392	0.0299706	1.01135	0.992633	1.03042	0.6791
insomnia	Oligodendrocytes_control_CDH4	Wald ratio	1	-0.00835667	0.00704125	0.2353	-0.0221575	0.00544418	0.991678	0.978086	1.00546	0.6791
insomnia	Astrocytes_control_MGST1	Wald ratio	1	0.0143503	0.0121328	0.2369	-0.00942994	0.0381305	1.01445	0.990614	1.03887	0.6791
insomnia	Inhibitory_control_PRPSAP1	Wald ratio	1	-0.0151693	0.0128307	0.2371	-0.0403174	0.00997884	0.984945	0.960485	1.01003	0.6791
insomnia	Excitatory_control_LINC02234	Wald ratio	1	-0.0167643	0.0141586	0.2364	-0.0445152	0.0109866	0.983375	0.956461	1.01105	0.6791
insomnia	OPCs_control_UPF3A	Wald ratio	1	0.0130095	0.0109476	0.2347	-0.00844787	0.0344669	1.01309	0.991588	1.03507	0.6791
insomnia	Inhibitory_control_LINC00839	Wald ratio	1	0.0103477	0.0087282	0.2358	-0.00675955	0.027455	1.0104	0.993263	1.02784	0.6791
insomnia	Excitatory_control_CYB561	Wald ratio	1	0.00866423	0.00737076	0.2398	-0.00578246	0.0231109	1.0087	0.994234	1.02338	0.6855
insomnia	Microglia_control_LINC01340	Wald ratio	1	-0.00617088	0.00525523	0.2403	-0.0164711	0.00412936	0.993848	0.983664	1.00414	0.6855
insomnia	Oligodendrocytes_control_ADAMTS2	Wald ratio	1	-0.0131686	0.0113318	0.2452	-0.0353789	0.0090418	0.986918	0.96524	1.00908	0.687
insomnia	Oligodendrocytes_control_LURAP1L	Wald ratio	1	-0.00680086	0.00582999	0.2434	-0.0182276	0.00462592	0.993222	0.981937	1.00464	0.687
insomnia	Excitatory_control_GPR161	Wald ratio	1	-0.0176875	0.0153142	0.2481	-0.0477034	0.0123283	0.982468	0.953417	1.0124	0.687
insomnia	Oligodendrocytes_control_SCART1	Wald ratio	1	-0.016834	0.0145752	0.2481	-0.0454014	0.0117334	0.983307	0.955614	1.0118	0.687
insomnia	Pericytes_control_COL24A1	Wald ratio	1	-0.00857962	0.0074174	0.2474	-0.0231177	0.00595849	0.991457	0.977147	1.00598	0.687
insomnia	Excitatory_control_ITGA6	Wald ratio	1	-0.0119634	0.0102294	0.2422	-0.032013	0.0080863	0.988108	0.968494	1.00812	0.687
insomnia	OPCs_control_DHCR7	Wald ratio	1	-0.0110309	0.00954874	0.248	-0.0297464	0.00768463	0.98903	0.970692	1.00771	0.687
insomnia	Inhibitory_control_CYB561	Wald ratio	1	0.00837396	0.0072136	0.2457	-0.0057647	0.0225126	1.00841	0.994252	1.02277	0.687
insomnia	OPCs_control_PLD5	Wald ratio	1	0.00948008	0.00815434	0.245	-0.00650244	0.0254626	1.00953	0.993519	1.02579	0.687
insomnia	OPCs_control_PEX5L	Wald ratio	1	0.0142062	0.0122429	0.2459	-0.00978981	0.0382022	1.01431	0.990258	1.03894	0.687
insomnia	Inhibitory_control_SMCO4	Wald ratio	1	0.02347	0.0203165	0.248	-0.0163503	0.0632904	1.02375	0.983783	1.06534	0.687
insomnia	Excitatory_control_GFM2	Wald ratio	1	-0.0129718	0.0111578	0.245	-0.0348412	0.00889746	0.987112	0.965759	1.00894	0.687
insomnia	Astrocytes_control_XYLT2	Wald ratio	1	-0.019937	0.0170944	0.2435	-0.053442	0.0135681	0.98026	0.947961	1.01366	0.687
insomnia	Inhibitory_control_TCEA3	Wald ratio	1	-0.0115292	0.00991691	0.245	-0.0309664	0.00790795	0.988537	0.969508	1.00794	0.687
insomnia	OPCs_control_MIAT	Wald ratio	1	-0.0118818	0.0102116	0.2446	-0.0318965	0.00813284	0.988188	0.968607	1.00817	0.687
insomnia	Oligodendrocytes_control_SYT14	Wald ratio	1	0.00822093	0.00714194	0.2497	-0.00577727	0.0222191	1.00825	0.994239	1.02247	0.6885
insomnia	Excitatory_control_MIR4713HG	Wald ratio	1	0.0208638	0.0181407	0.2501	-0.0146921	0.0564196	1.02108	0.985415	1.05804	0.6885
insomnia	Excitatory_control_CR2	Wald ratio	1	0.0157429	0.0136796	0.2498	-0.011069	0.0425549	1.01587	0.988992	1.04347	0.6885
insomnia	Inhibitory_control_TRIM31	Wald ratio	1	0.00708836	0.00617364	0.2509	-0.00501197	0.0191887	1.00711	0.995001	1.01937	0.6894
insomnia	Excitatory_control_C17orf75	Wald ratio	1	0.0274152	0.024039	0.2541	-0.0197012	0.0745317	1.02779	0.980492	1.07738	0.6902
insomnia	OPCs_control_NIPAL3	Wald ratio	1	-0.0164075	0.0144476	0.2561	-0.0447247	0.0119097	0.983726	0.956261	1.01198	0.6902
insomnia	Microglia_control_SMIM35	Wald ratio	1	-0.00796659	0.00706525	0.2595	-0.0218145	0.0058813	0.992065	0.978422	1.0059	0.6902
insomnia	Excitatory_control_ZNF501	Wald ratio	1	-0.0149408	0.0132393	0.2591	-0.0408899	0.0110082	0.98517	0.959935	1.01107	0.6902
insomnia	Excitatory_control_RNASEL	Wald ratio	1	0.0155627	0.0137499	0.2577	-0.0113871	0.0425125	1.01568	0.988678	1.04343	0.6902
insomnia	Astrocytes_control_DNAJC15	Wald ratio	1	0.022357	0.0196078	0.2542	-0.0160744	0.0607883	1.02261	0.984054	1.06267	0.6902
insomnia	Excitatory_control_PRKRA	Wald ratio	1	0.0144827	0.0127098	0.2545	-0.0104286	0.039394	1.01459	0.989626	1.04018	0.6902
insomnia	Excitatory_control_ZNF667	Wald ratio	1	-0.0197256	0.0174571	0.2585	-0.0539416	0.0144904	0.980468	0.947487	1.0146	0.6902
insomnia	Inhibitory_control_ZSCAN31	Wald ratio	1	0.0116183	0.0101597	0.2528	-0.0082946	0.0315313	1.01169	0.99174	1.03203	0.6902
insomnia	Oligodendrocytes_control_D2HGDH	Wald ratio	1	0.0154791	0.0136674	0.2574	-0.011309	0.0422672	1.0156	0.988755	1.04317	0.6902
insomnia	Excitatory_control_DSC1	Wald ratio	1	-0.0082933	0.00724139	0.2521	-0.0224864	0.00589983	0.991741	0.977765	1.00592	0.6902
insomnia	Inhibitory_control_RNF39	Wald ratio	1	0.00905088	0.00798818	0.2572	-0.00660595	0.0247077	1.00909	0.993416	1.02502	0.6902
insomnia	Astrocytes_control_MIR4713HG	Wald ratio	1	0.0121453	0.0107035	0.2565	-0.00883358	0.0331242	1.01222	0.991205	1.03368	0.6902
insomnia	Excitatory_control_ZNF502	Wald ratio	1	-0.0137604	0.0121933	0.2591	-0.0376592	0.0101384	0.986334	0.963041	1.01019	0.6902
insomnia	Excitatory_control_CIAO3	Wald ratio	1	-0.0163454	0.0143959	0.2562	-0.0445613	0.0118706	0.983788	0.956417	1.01194	0.6902
insomnia	Astrocytes_control_SNX31	Wald ratio	1	0.0077749	0.00688656	0.2589	-0.00572277	0.0212726	1.00781	0.994294	1.0215	0.6902
insomnia	Oligodendrocytes_control_MCCC2	Wald ratio	1	0.0227346	0.0201159	0.2584	-0.0166925	0.0621617	1.02299	0.983446	1.06413	0.6902
insomnia	Astrocytes_control_TPM2	Wald ratio	1	-0.0107236	0.00952431	0.2602	-0.0293912	0.00794405	0.989334	0.971036	1.00798	0.6908
insomnia	Endothelial_control_ARL5C	Wald ratio	1	0.00818784	0.00728283	0.2609	-0.0060865	0.0224622	1.00822	0.993932	1.02272	0.6913
insomnia	Astrocytes_control_ALDH8A1	Wald ratio	1	0.0121853	0.0109068	0.2639	-0.00919202	0.0335626	1.01226	0.99085	1.03413	0.6967
insomnia	Excitatory_control_POLD3	Wald ratio	1	0.0230208	0.0205925	0.2636	-0.0173405	0.0633822	1.02329	0.982809	1.06543	0.6967
insomnia	Oligodendrocytes_control_LINC00499	Wald ratio	1	0.00678264	0.00618753	0.273	-0.00534491	0.0189102	1.00681	0.994669	1.01909	0.6973
insomnia	Excitatory_control_TRIM69	Wald ratio	1	-0.0152328	0.0138529	0.2715	-0.0423844	0.0119188	0.984883	0.958501	1.01199	0.6973
insomnia	OPCs_control_MPPE1	Wald ratio	1	-0.0171213	0.0155475	0.2708	-0.0475944	0.0133519	0.983024	0.95352	1.01344	0.6973
insomnia	Pericytes_control_CSNK2A2	Wald ratio	1	-0.00941117	0.00857827	0.2726	-0.0262246	0.00740223	0.990633	0.974116	1.00743	0.6973
insomnia	Excitatory_control_TDRKH	Wald ratio	1	0.0178787	0.0161778	0.2691	-0.0138298	0.0495872	1.01804	0.986265	1.05084	0.6973
insomnia	Oligodendrocytes_control_SNAP91	Wald ratio	1	0.012516	0.0113064	0.2683	-0.00964448	0.0346764	1.01259	0.990402	1.03528	0.6973
insomnia	Oligodendrocytes_control_MPPE1	Wald ratio	1	-0.0139709	0.0126868	0.2708	-0.038837	0.0108951	0.986126	0.961907	1.01095	0.6973
insomnia	Inhibitory_control_TRIM69	Wald ratio	1	-0.0132279	0.0120296	0.2715	-0.036806	0.0103501	0.986859	0.963863	1.0104	0.6973
insomnia	Excitatory_control_MRPL19	Wald ratio	1	-0.0222083	0.0201543	0.2705	-0.0617108	0.0172942	0.978036	0.940155	1.01744	0.6973
insomnia	Inhibitory_control_LINC02175	Wald ratio	1	0.0136565	0.0122595	0.2653	-0.0103722	0.0376852	1.01375	0.989681	1.0384	0.6973
insomnia	Inhibitory_control_MPPE1	Wald ratio	1	-0.0195653	0.0177669	0.2708	-0.0543885	0.0152578	0.980625	0.947064	1.01537	0.6973
insomnia	Excitatory_control_MPPE1	Wald ratio	1	-0.0158281	0.0143732	0.2708	-0.0439996	0.0123434	0.984297	0.956954	1.01242	0.6973
insomnia	Astrocytes_control_DPH1	Wald ratio	1	0.0123813	0.0111171	0.2654	-0.00940817	0.0341707	1.01246	0.990636	1.03476	0.6973
insomnia	Inhibitory_control_COL28A1	Wald ratio	1	0.0232701	0.0212195	0.2728	-0.0183202	0.0648605	1.02354	0.981847	1.06701	0.6973
insomnia	Astrocytes_control_MPPE1	Wald ratio	1	-0.0198156	0.0179942	0.2708	-0.0550842	0.015453	0.980379	0.946405	1.01557	0.6973
insomnia	Oligodendrocytes_control_FBXO32	Wald ratio	1	0.0174871	0.0159262	0.2722	-0.0137282	0.0487024	1.01764	0.986366	1.04991	0.6973
insomnia	Excitatory_control_DNAJC15	Wald ratio	1	0.0176172	0.0159679	0.2699	-0.0136798	0.0489143	1.01777	0.986413	1.05013	0.6973
insomnia	Astrocytes_control_LINC00499	Wald ratio	1	0.0081423	0.00742789	0.273	-0.00641636	0.022701	1.00818	0.993604	1.02296	0.6973
insomnia	OPCs_control_CLEC18C	Wald ratio	1	-0.00904099	0.00829771	0.2759	-0.0253045	0.00722253	0.991	0.975013	1.00725	0.6996
insomnia	Inhibitory_control_SLC22A31	Wald ratio	1	0.00828815	0.0075941	0.2751	-0.00659629	0.0231726	1.00832	0.993425	1.02344	0.6996
insomnia	Oligodendrocytes_control_MPPED1	Wald ratio	1	-0.00943868	0.0086555	0.2755	-0.0264035	0.0075261	0.990606	0.973942	1.00755	0.6996
insomnia	Astrocytes_control_ACOT1	Wald ratio	1	0.0110604	0.0101426	0.2755	-0.00881918	0.0309399	1.01112	0.99122	1.03142	0.6996
insomnia	OPCs_control_HLA-B	Wald ratio	1	0.0116234	0.0106923	0.277	-0.00933349	0.0325803	1.01169	0.99071	1.03312	0.7012
insomnia	Microglia_control_ESRRG	Wald ratio	1	-0.00664745	0.00612258	0.2776	-0.0186477	0.00535281	0.993375	0.981525	1.00537	0.7014
insomnia	Inhibitory_control_FPR1	Wald ratio	1	-0.0093599	0.00866401	0.28	-0.0263414	0.00762157	0.990684	0.974003	1.00765	0.705
insomnia	Excitatory_control_LINC02016	Wald ratio	1	-0.0143981	0.0133276	0.28	-0.0405202	0.011724	0.985705	0.96029	1.01179	0.705
insomnia	Inhibitory_control_MUC20	Wald ratio	1	-0.0140338	0.0130256	0.2813	-0.0395639	0.0114963	0.986064	0.961209	1.01156	0.707
insomnia	Oligodendrocytes_control_COL28A1	Wald ratio	1	0.00979743	0.00929388	0.2918	-0.00841857	0.0280134	1.00985	0.991617	1.02841	0.7084
insomnia	Excitatory_control_NPIPA5	Wald ratio	1	-0.0088308	0.00843439	0.2951	-0.0253622	0.0077006	0.991208	0.974957	1.00773	0.7084
insomnia	Excitatory_control_CAPN9	Wald ratio	1	-0.00861429	0.00808894	0.2869	-0.0244686	0.00724003	0.991423	0.975828	1.00727	0.7084
insomnia	Excitatory_control_NMRK1	Wald ratio	1	0.00738152	0.00706039	0.2958	-0.00645685	0.0212199	1.00741	0.993564	1.02145	0.7084
insomnia	Oligodendrocytes_control_XYLT2	Wald ratio	1	-0.01744	0.0165162	0.291	-0.0498118	0.0149318	0.982711	0.951408	1.01504	0.7084
insomnia	Astrocytes_control_ADCY1	Wald ratio	1	0.0104009	0.00995044	0.2959	-0.00910201	0.0299037	1.01046	0.990939	1.03036	0.7084
insomnia	Endothelial_control_OLA1	Wald ratio	1	0.00896834	0.00852505	0.2928	-0.00774075	0.0256774	1.00901	0.992289	1.02601	0.7084
insomnia	Astrocytes_control_SPX	Wald ratio	1	-0.0106585	0.0100647	0.2896	-0.0303854	0.00906832	0.989398	0.970072	1.00911	0.7084
insomnia	Excitatory_control_MCOLN3	Wald ratio	1	0.0181813	0.0172718	0.2925	-0.0156715	0.0520341	1.01835	0.984451	1.05341	0.7084
insomnia	Oligodendrocytes_control_MGRN1	Wald ratio	1	0.0183795	0.0172622	0.287	-0.0154544	0.0522135	1.01855	0.984664	1.0536	0.7084
insomnia	Astrocytes_control_MIR4300HG	Wald ratio	1	-0.00765595	0.00736241	0.2984	-0.0220863	0.00677437	0.992373	0.978156	1.0068	0.7084
insomnia	Excitatory_control_GPR39	Wald ratio	1	-0.0169402	0.0159964	0.2896	-0.0482932	0.0144128	0.983202	0.952854	1.01452	0.7084
insomnia	Endothelial_control_RBM20	Wald ratio	1	-0.00736764	0.00706172	0.2968	-0.0212086	0.00647334	0.992659	0.979015	1.00649	0.7084
insomnia	Astrocytes_control_NPIPA5	Wald ratio	1	-0.00972331	0.00928683	0.2951	-0.0279255	0.00847889	0.990324	0.972461	1.00851	0.7084
insomnia	OPCs_control_CRISPLD1	Wald ratio	1	-0.0141411	0.0132374	0.2854	-0.0400864	0.0118042	0.985958	0.960706	1.01187	0.7084
insomnia	Excitatory_control_RPIA	Wald ratio	1	-0.0163386	0.0152881	0.2852	-0.0463033	0.0136261	0.983794	0.954752	1.01372	0.7084
insomnia	Inhibitory_control_NMRK1	Wald ratio	1	0.00885741	0.00847208	0.2958	-0.00774787	0.0254627	1.0089	0.992282	1.02579	0.7084
insomnia	Excitatory_control_HLA-DOA	Wald ratio	1	0.00977754	0.00938321	0.2974	-0.00861355	0.0281686	1.00983	0.991423	1.02857	0.7084
insomnia	Microglia_control_GNLY	Wald ratio	1	-0.00777508	0.00738923	0.2927	-0.022258	0.00670782	0.992255	0.977988	1.00673	0.7084
insomnia	Oligodendrocytes_control_MTUS1	Wald ratio	1	0.00752634	0.00720488	0.2962	-0.00659522	0.0216479	1.00755	0.993426	1.02188	0.7084
insomnia	Excitatory_control_TTC21A	Wald ratio	1	-0.0362916	0.0348929	0.2983	-0.104682	0.0320984	0.964359	0.900611	1.03262	0.7084
insomnia	Excitatory_control_STRC	Wald ratio	1	0.0160667	0.0154027	0.2969	-0.0141227	0.046256	1.0162	0.985977	1.04734	0.7084
insomnia	Oligodendrocytes_control_F11R	Wald ratio	1	-0.0085659	0.00817122	0.2945	-0.0245815	0.0074497	0.991471	0.975718	1.00748	0.7084
insomnia	Inhibitory_control_LINC02482	Wald ratio	1	0.0139764	0.0131649	0.2884	-0.0118269	0.0397796	1.01407	0.988243	1.04058	0.7084
insomnia	Oligodendrocytes_control_NPIPA5	Wald ratio	1	-0.00840905	0.00803157	0.2951	-0.0241509	0.00733283	0.991626	0.976138	1.00736	0.7084
insomnia	Inhibitory_control_NPIPA5	Wald ratio	1	-0.00774208	0.00739454	0.2951	-0.0222354	0.00675122	0.992288	0.97801	1.00677	0.7084
insomnia	Oligodendrocytes_control_TYRP1	Wald ratio	1	-0.0100759	0.00946337	0.287	-0.0286241	0.00847231	0.989975	0.971782	1.00851	0.7084
insomnia	Excitatory_control_SLC22A18	Wald ratio	1	0.0119241	0.0112621	0.2897	-0.0101497	0.0339979	1.012	0.989902	1.03458	0.7084
insomnia	Oligodendrocytes_control_ZNF667	Wald ratio	1	-0.0229628	0.0214998	0.2855	-0.0651024	0.0191769	0.977299	0.936971	1.01936	0.7084
insomnia	Inhibitory_control_DNAJC15	Wald ratio	1	0.0117025	0.0110872	0.2912	-0.0100285	0.0334335	1.01177	0.990022	1.034	0.7084
insomnia	Oligodendrocytes_control_NINL	Wald ratio	1	-0.0145861	0.0137165	0.2876	-0.0414704	0.0122982	0.98552	0.959378	1.01237	0.7084
insomnia	Microglia_control_NPIPA5	Wald ratio	1	-0.00831496	0.0079417	0.2951	-0.0238807	0.00725078	0.99172	0.976402	1.00728	0.7084
insomnia	Astrocytes_control_TNFAIP6	Wald ratio	1	-0.00917415	0.00853632	0.2825	-0.0259053	0.00755703	0.990868	0.974427	1.00759	0.7084
insomnia	Excitatory_control_ZNF34	Wald ratio	1	-0.0190819	0.0184645	0.3014	-0.0552724	0.0171086	0.981099	0.946227	1.01726	0.7144
insomnia	Excitatory_control_PCM1	Wald ratio	1	0.00775832	0.00756967	0.3054	-0.00707824	0.0225949	1.00779	0.992947	1.02285	0.7202
insomnia	Oligodendrocytes_control_PCM1	Wald ratio	1	0.0168174	0.0164085	0.3054	-0.0153432	0.0489781	1.01696	0.984774	1.0502	0.7202
insomnia	Excitatory_control_GSTM2	Wald ratio	1	0.0172129	0.0167631	0.3045	-0.0156428	0.0500685	1.01736	0.984479	1.05134	0.7202
insomnia	Inhibitory_control_CERS5	Wald ratio	1	0.00709954	0.00699165	0.3099	-0.00660409	0.0208032	1.00712	0.993418	1.02102	0.7248
insomnia	OPCs_control_RSPO4	Wald ratio	1	-0.00847415	0.0083402	0.3096	-0.0248209	0.00787263	0.991562	0.975485	1.0079	0.7248
insomnia	Oligodendrocytes_control_RSPO4	Wald ratio	1	-0.00970967	0.00955618	0.3096	-0.0284398	0.00902044	0.990337	0.971961	1.00906	0.7248
insomnia	Excitatory_control_SCART1	Wald ratio	1	-0.00998295	0.00982108	0.3094	-0.0292323	0.00926637	0.990067	0.971191	1.00931	0.7248
insomnia	Excitatory_control_CERS5	Wald ratio	1	0.0069388	0.00683335	0.3099	-0.00645457	0.0203322	1.00696	0.993566	1.02054	0.7248
insomnia	Astrocytes_control_SPATA1	Wald ratio	1	-0.00951767	0.00939436	0.311	-0.0279306	0.00889527	0.990527	0.972456	1.00893	0.7262
insomnia	Excitatory_control_ALDH8A1	Wald ratio	1	0.0100406	0.00994743	0.3128	-0.00945638	0.0295375	1.01009	0.990588	1.02998	0.7268
insomnia	Inhibitory_control_ALDH8A1	Wald ratio	1	0.0142798	0.0141473	0.3128	-0.013449	0.0420086	1.01438	0.986641	1.0429	0.7268
insomnia	Astrocytes_control_LINC01876	Wald ratio	1	0.0081925	0.00809973	0.3118	-0.00768298	0.024068	1.00823	0.992346	1.02436	0.7268
insomnia	Excitatory_control_SFXN4	Wald ratio	1	-0.0149996	0.0148851	0.3136	-0.0441744	0.0141751	0.985112	0.956787	1.01428	0.7274
insomnia	OPCs_control_TRPM3	Wald ratio	1	0.00967324	0.00964907	0.3161	-0.00923894	0.0285854	1.00972	0.990804	1.029	0.7297
insomnia	Astrocytes_control_LINC02021	Wald ratio	1	-0.0129356	0.0128899	0.3156	-0.0381998	0.0123287	0.987148	0.962521	1.01241	0.7297
insomnia	Endothelial_control_SULT1C2	Wald ratio	1	-0.00558966	0.00556419	0.3151	-0.0164955	0.00531615	0.994426	0.98364	1.00533	0.7297
insomnia	Excitatory_control_XYLT2	Wald ratio	1	-0.0143761	0.0143877	0.3177	-0.042576	0.0138238	0.985727	0.958318	1.01392	0.7314
insomnia	Inhibitory_control_SNX19	Wald ratio	1	-0.0207261	0.0207513	0.3179	-0.0613986	0.0199465	0.979487	0.940448	1.02015	0.7314
insomnia	OPCs_control_FBXO7	Wald ratio	1	-0.0102209	0.0102885	0.3205	-0.0303864	0.00994454	0.989831	0.970071	1.00999	0.7362
insomnia	Oligodendrocytes_control_APOLD1	Wald ratio	1	-0.0117931	0.011903	0.3218	-0.035123	0.0115368	0.988276	0.965487	1.0116	0.7368
insomnia	Inhibitory_control_LINC00964	Wald ratio	1	0.00970458	0.009793	0.3217	-0.00948971	0.0288989	1.00975	0.990555	1.02932	0.7368
insomnia	Astrocytes_control_CCDC163	Wald ratio	1	-0.00838713	0.00849685	0.3236	-0.025041	0.0082667	0.991648	0.97527	1.0083	0.7397
insomnia	Excitatory_control_AXDND1	Wald ratio	1	-0.0139753	0.0141933	0.3248	-0.0417942	0.0138436	0.986122	0.959067	1.01394	0.7405
insomnia	Excitatory_control_VAMP8	Wald ratio	1	0.0171273	0.0174016	0.325	-0.0169799	0.0512344	1.01727	0.983163	1.05257	0.7405
insomnia	Oligodendrocytes_control_CLEC18A	Wald ratio	1	-0.00922501	0.00955871	0.3345	-0.0279601	0.00951006	0.990817	0.972427	1.00956	0.7425
insomnia	Oligodendrocytes_control_TMEM179	Wald ratio	1	-0.0103807	0.0107495	0.3342	-0.0314497	0.0106884	0.989673	0.96904	1.01075	0.7425
insomnia	Excitatory_control_SMAD9	Wald ratio	1	-0.0152045	0.0155634	0.3286	-0.0457088	0.0152998	0.984911	0.95532	1.01542	0.7425
insomnia	Excitatory_control_DDX59	Wald ratio	1	-0.0159535	0.0163301	0.3286	-0.0479604	0.0160535	0.984173	0.953172	1.01618	0.7425
insomnia	Excitatory_control_PHACTR4	Wald ratio	1	-0.00698377	0.00715603	0.3291	-0.0210096	0.00704205	0.993041	0.97921	1.00707	0.7425
insomnia	Astrocytes_control_LINC00299	Wald ratio	1	-0.00805996	0.00833254	0.3334	-0.0243917	0.00827181	0.991972	0.975903	1.00831	0.7425
insomnia	Oligodendrocytes_control_AMPD3	Wald ratio	1	-0.00555984	0.00576096	0.3345	-0.0168513	0.00573164	0.994456	0.98329	1.00575	0.7425
insomnia	Astrocytes_control_RIMS1	Wald ratio	1	0.00852794	0.00873468	0.3289	-0.00859202	0.0256479	1.00856	0.991445	1.02598	0.7425
insomnia	Astrocytes_control_HP	Wald ratio	1	-0.00677243	0.00700871	0.3339	-0.0205095	0.00696463	0.99325	0.979699	1.00699	0.7425
insomnia	Inhibitory_control_ACADS	Wald ratio	1	0.0124509	0.0128773	0.3336	-0.0127886	0.0376904	1.01253	0.987293	1.03841	0.7425
insomnia	Excitatory_control_CA3	Wald ratio	1	0.0162964	0.0167537	0.3307	-0.0165408	0.0491336	1.01643	0.983595	1.05036	0.7425
insomnia	OPCs_control_ZFHX3	Wald ratio	1	-0.024655	0.0251901	0.3277	-0.0740276	0.0247176	0.975646	0.928646	1.02503	0.7425
insomnia	Oligodendrocytes_control_ICOSLG	Wald ratio	1	0.0123886	0.0127257	0.3303	-0.0125538	0.0373309	1.01247	0.987525	1.03804	0.7425
insomnia	Excitatory_control_PARVA	Wald ratio	1	-0.0143492	0.0147824	0.3317	-0.0433227	0.0146243	0.985753	0.957602	1.01473	0.7425
insomnia	Excitatory_control_COL28A1	Wald ratio	1	0.0161355	0.0167226	0.3346	-0.0166408	0.0489118	1.01627	0.983497	1.05013	0.7425
insomnia	Excitatory_control_RIBC2	Wald ratio	1	0.00669239	0.00692015	0.3335	-0.0068711	0.0202559	1.00671	0.993152	1.02046	0.7425
insomnia	Excitatory_control_C12orf60	Wald ratio	1	-0.0146904	0.0152312	0.3348	-0.0445436	0.0151628	0.985417	0.956434	1.01528	0.7425
insomnia	Astrocytes_control_ZNF208	Wald ratio	1	0.00919179	0.00956378	0.3365	-0.00955323	0.0279368	1.00923	0.990492	1.02833	0.7451
insomnia	Endothelial_control_NKTR	Wald ratio	1	-0.00772952	0.00805733	0.3374	-0.0235219	0.00806285	0.9923	0.976753	1.0081	0.7455
insomnia	Excitatory_control_SPATA1	Wald ratio	1	-0.0160264	0.0167164	0.3377	-0.0487906	0.0167378	0.984101	0.952381	1.01688	0.7455
insomnia	Microglia_control_DST	Wald ratio	1	0.00846486	0.00884763	0.3387	-0.0088765	0.0258062	1.0085	0.991163	1.02614	0.7465
insomnia	Astrocytes_control_WFDC10B	Wald ratio	1	-0.0109526	0.0114787	0.34	-0.0334509	0.0115457	0.989107	0.967102	1.01161	0.747
insomnia	Excitatory_control_CDK10	Wald ratio	1	-0.0154902	0.0162208	0.3396	-0.0472829	0.0163026	0.984629	0.953817	1.01644	0.747
insomnia	Excitatory_control_DIMT1	Wald ratio	1	0.016789	0.0176466	0.3414	-0.0177983	0.0513763	1.01693	0.982359	1.05272	0.749
insomnia	Excitatory_control_MAEL	Wald ratio	1	0.0150782	0.0159373	0.3441	-0.0161589	0.0463153	1.01519	0.983971	1.0474	0.7537
insomnia	Excitatory_control_FAM83H	Wald ratio	1	-0.0093435	0.00989635	0.3451	-0.0287403	0.0100533	0.9907	0.971669	1.0101	0.7547
insomnia	Excitatory_control_ANO7	Wald ratio	1	0.011754	0.0124727	0.346	-0.0126926	0.0362006	1.01182	0.987388	1.03686	0.7555
insomnia	Excitatory_control_TOGARAM2	Wald ratio	1	0.00505691	0.00538619	0.3478	-0.00550003	0.0156138	1.00507	0.994515	1.01574	0.756
insomnia	Oligodendrocytes_control_LINC00654	Wald ratio	1	0.00927631	0.00988034	0.3478	-0.0100892	0.0286418	1.00932	0.989962	1.02906	0.756
insomnia	Microglia_control_ERVH48-1	Wald ratio	1	0.00793593	0.00844217	0.3472	-0.00861073	0.0244826	1.00797	0.991426	1.02478	0.756
insomnia	Excitatory_control_NUDT12	Wald ratio	1	0.0160858	0.0171653	0.3487	-0.0175581	0.0497297	1.01622	0.982595	1.05099	0.7568
insomnia	Excitatory_control_RNF8	Wald ratio	1	-0.0202314	0.0217104	0.3514	-0.0627838	0.0223209	0.979972	0.939147	1.02257	0.7586
insomnia	Excitatory_control_EME1	Wald ratio	1	-0.00790123	0.00847004	0.3509	-0.0245025	0.00870004	0.99213	0.975795	1.00874	0.7586
insomnia	Pericytes_control_CTSB	Wald ratio	1	0.00829757	0.00893935	0.3533	-0.00922355	0.0258187	1.00833	0.990819	1.02615	0.7586
insomnia	OPCs_control_SNX19	Wald ratio	1	-0.0124318	0.0133712	0.3525	-0.0386393	0.0137756	0.987645	0.962098	1.01387	0.7586
insomnia	Oligodendrocytes_control_RCBTB1	Wald ratio	1	-0.00962805	0.0103727	0.3533	-0.0299586	0.0107025	0.990418	0.970486	1.01076	0.7586
insomnia	Excitatory_control_LINC00958	Wald ratio	1	0.00985924	0.0106218	0.3533	-0.0109595	0.030678	1.00991	0.9891	1.03115	0.7586
insomnia	Inhibitory_control_RNF8	Wald ratio	1	-0.0198836	0.0213371	0.3514	-0.0617043	0.0219372	0.980313	0.940161	1.02218	0.7586
insomnia	OPCs_control_KCNJ6	Wald ratio	1	-0.00974991	0.0105543	0.3556	-0.0304364	0.0109366	0.990297	0.970022	1.011	0.7624
insomnia	Inhibitory_control_CCZ1B	Wald ratio	1	-0.0121917	0.0135542	0.3684	-0.0387579	0.0143746	0.987882	0.961984	1.01448	0.7643
insomnia	Excitatory_control_ERAP1	Wald ratio	1	0.0149244	0.0165164	0.3662	-0.0174476	0.0472965	1.01504	0.982704	1.04843	0.7643
insomnia	Oligodendrocytes_control_LATS1	Wald ratio	1	-0.026562	0.0288975	0.358	-0.0832011	0.030077	0.973788	0.920166	1.03053	0.7643
insomnia	Inhibitory_control_SLC39A8	Wald ratio	1	-0.00793539	0.00873253	0.3635	-0.0250511	0.00918036	0.992096	0.97526	1.00922	0.7643
insomnia	Oligodendrocytes_control_HSD17B4	Wald ratio	1	-0.0054737	0.00602858	0.3639	-0.0172897	0.00634231	0.994541	0.982859	1.00636	0.7643
insomnia	Excitatory_control_GRAMD1C	Wald ratio	1	0.00960044	0.0104315	0.3574	-0.0108453	0.0300462	1.00965	0.989213	1.0305	0.7643
insomnia	Excitatory_control_METTL27	Wald ratio	1	0.00867502	0.00959235	0.3658	-0.010126	0.027476	1.00871	0.989925	1.02786	0.7643
insomnia	Oligodendrocytes_control_TST	Wald ratio	1	-0.0145678	0.0161857	0.3681	-0.0462919	0.0171563	0.985538	0.954763	1.0173	0.7643
insomnia	Excitatory_control_TMPRSS11A	Wald ratio	1	0.0141773	0.0155172	0.3609	-0.0162364	0.044591	1.01428	0.983895	1.0456	0.7643
insomnia	Microglia_control_KCNMA1	Wald ratio	1	0.00524016	0.00576175	0.3631	-0.00605287	0.0165332	1.00525	0.993965	1.01667	0.7643
insomnia	Oligodendrocytes_control_C17orf100	Wald ratio	1	0.00719823	0.00794613	0.365	-0.00837619	0.0227727	1.00722	0.991659	1.02303	0.7643
insomnia	Excitatory_control_TAF1B	Wald ratio	1	-0.0205888	0.0228468	0.3675	-0.0653685	0.024191	0.979622	0.936722	1.02449	0.7643
insomnia	Excitatory_control_DISC1	Wald ratio	1	0.0105833	0.0115282	0.3586	-0.0120119	0.0331785	1.01064	0.98806	1.03374	0.7643
insomnia	Excitatory_control_ZNF320	Wald ratio	1	0.0119058	0.0130175	0.3604	-0.0136084	0.03742	1.01198	0.986484	1.03813	0.7643
insomnia	Excitatory_control_EPB41L5	Wald ratio	1	0.016697	0.0185012	0.3668	-0.0195653	0.0529592	1.01684	0.980625	1.05439	0.7643
insomnia	Microglia_control_SLFN5	Wald ratio	1	-0.00714386	0.00793397	0.3679	-0.0226944	0.00840673	0.992882	0.977561	1.00844	0.7643
insomnia	Oligodendrocytes_control_UTP23	Wald ratio	1	-0.0176543	0.019355	0.3617	-0.0555901	0.0202815	0.982501	0.945927	1.02049	0.7643
insomnia	Oligodendrocytes_control_SLCO6A1	Wald ratio	1	0.0120359	0.0131241	0.3591	-0.0136874	0.0377591	1.01211	0.986406	1.03848	0.7643
insomnia	Inhibitory_control_PSCA	Wald ratio	1	0.00812917	0.0089551	0.364	-0.00942283	0.0256812	1.00816	0.990621	1.02601	0.7643
insomnia	Oligodendrocytes_control_MYH11	Wald ratio	1	0.0105608	0.0116605	0.3651	-0.0122938	0.0334153	1.01062	0.987781	1.03398	0.7643
insomnia	Oligodendrocytes_control_MLKL	Wald ratio	1	0.0110169	0.0121084	0.3629	-0.0127156	0.0347494	1.01108	0.987365	1.03536	0.7643
insomnia	Excitatory_control_RNF114	Wald ratio	1	0.0247924	0.0273113	0.364	-0.0287378	0.0783225	1.0251	0.971671	1.08147	0.7643
insomnia	Inhibitory_control_WWOX	Wald ratio	1	-0.0117092	0.0130806	0.3707	-0.0373472	0.0139287	0.988359	0.963342	1.01403	0.7648
insomnia	Excitatory_control_LINC01273	Wald ratio	1	-0.0144262	0.016072	0.3694	-0.0459272	0.0170749	0.985677	0.955111	1.01722	0.7648
insomnia	Microglia_control_MIR4300HG	Wald ratio	1	-0.00723792	0.00808897	0.3709	-0.0230923	0.00861646	0.992788	0.977172	1.00865	0.7648
insomnia	Astrocytes_control_IQCB1	Wald ratio	1	-0.0188348	0.021067	0.3713	-0.0601262	0.0224566	0.981341	0.941646	1.02271	0.7648
insomnia	Excitatory_control_WWOX	Wald ratio	1	-0.0124602	0.0139194	0.3707	-0.0397422	0.0148219	0.987617	0.961037	1.01493	0.7648
insomnia	Excitatory_control_PCDHA9	Wald ratio	1	0.0134579	0.0151001	0.3728	-0.0161384	0.0430541	1.01355	0.983991	1.04399	0.7656
insomnia	Astrocytes_control_DAB1	Wald ratio	1	0.00953602	0.0106885	0.3723	-0.0114135	0.0304855	1.00958	0.988651	1.03095	0.7656
insomnia	Excitatory_control_CAPS	Wald ratio	1	0.0118774	0.0133436	0.3734	-0.014276	0.0380309	1.01195	0.985825	1.03876	0.7657
insomnia	Excitatory_control_RFWD3	Wald ratio	1	0.0139721	0.0157297	0.3744	-0.0168581	0.0448022	1.01407	0.983283	1.04582	0.7662
insomnia	Excitatory_control_GJC1	Wald ratio	1	-0.0131542	0.0148182	0.3747	-0.0421979	0.0158895	0.986932	0.95868	1.01602	0.7662
insomnia	Microglia_control_FAM133B	Wald ratio	1	-0.00699487	0.00791613	0.3769	-0.0225105	0.00852074	0.99303	0.977741	1.00856	0.7663
insomnia	Astrocytes_control_CAMK4	Wald ratio	1	0.0123699	0.0139874	0.3765	-0.0150453	0.0397852	1.01245	0.985067	1.04059	0.7663
insomnia	Inhibitory_control_SFXN4	Wald ratio	1	-0.013907	0.0156925	0.3755	-0.0446642	0.0168503	0.986189	0.956319	1.01699	0.7663
insomnia	Inhibitory_control_TRIM44	Wald ratio	1	-0.00924639	0.0104467	0.3761	-0.0297218	0.0112291	0.990796	0.970716	1.01129	0.7663
insomnia	Inhibitory_control_BTBD16	Wald ratio	1	-0.00944489	0.0107158	0.3781	-0.0304478	0.011558	0.9906	0.970011	1.01163	0.7664
insomnia	Excitatory_control_LY6G5C	Wald ratio	1	-0.00934155	0.0106096	0.3786	-0.0301364	0.0114533	0.990702	0.970313	1.01152	0.7664
insomnia	Excitatory_control_SERPINF2	Wald ratio	1	-0.0125455	0.0142275	0.3779	-0.0404315	0.0153405	0.987533	0.960375	1.01546	0.7664
insomnia	Excitatory_control_PDLIM4	Wald ratio	1	-0.00774928	0.00883452	0.3804	-0.0250649	0.00956638	0.992281	0.975247	1.00961	0.769
insomnia	Excitatory_control_ZNF623	Wald ratio	1	0.0152081	0.0175691	0.3867	-0.0192273	0.0496436	1.01532	0.980956	1.0509	0.7761
insomnia	Excitatory_control_CABCOCO1	Wald ratio	1	0.00999665	0.0115267	0.3858	-0.0125957	0.032589	1.01005	0.987483	1.03313	0.7761
insomnia	Inhibitory_control_TOGARAM2	Wald ratio	1	0.00544384	0.00627574	0.3857	-0.00685661	0.0177443	1.00546	0.993167	1.0179	0.7761
insomnia	Oligodendrocytes_control_S100A13	Wald ratio	1	0.00768511	0.00886697	0.3861	-0.00969415	0.0250644	1.00771	0.990353	1.02538	0.7761
insomnia	Oligodendrocytes_control_EBPL	Wald ratio	1	-0.00978165	0.0112883	0.3862	-0.0319067	0.0123434	0.990266	0.968597	1.01242	0.7761
insomnia	Oligodendrocytes_control_TTC23	Wald ratio	1	0.00658989	0.00762899	0.3877	-0.00836293	0.0215427	1.00661	0.991672	1.02178	0.777
insomnia	Oligodendrocytes_control_C1GALT1	Wald ratio	1	0.0134535	0.0156341	0.3895	-0.0171893	0.0440963	1.01354	0.982958	1.04508	0.7796
insomnia	Excitatory_control_ESRRB	Wald ratio	1	-0.0144867	0.0171436	0.3981	-0.0480881	0.0191148	0.985618	0.95305	1.0193	0.7802
insomnia	Oligodendrocytes_control_MIR4300HG	Wald ratio	1	-0.00636606	0.00749226	0.3955	-0.0210509	0.00831876	0.993654	0.979169	1.00835	0.7802
insomnia	Inhibitory_control_CABCOCO1	Wald ratio	1	0.0113639	0.0134396	0.3978	-0.0149777	0.0377056	1.01143	0.985134	1.03843	0.7802
insomnia	Inhibitory_control_PM20D1	Wald ratio	1	0.00500329	0.00586602	0.3937	-0.00649412	0.0165007	1.00502	0.993527	1.01664	0.7802
insomnia	Astrocytes_control_MRPL23	Wald ratio	1	0.0111681	0.0130084	0.3906	-0.0143283	0.0366645	1.01123	0.985774	1.03734	0.7802
insomnia	Oligodendrocytes_control_TMPRSS5	Wald ratio	1	0.00437148	0.005159	0.3968	-0.00574016	0.0144831	1.00438	0.994276	1.01459	0.7802
insomnia	Oligodendrocytes_control_PM20D1	Wald ratio	1	0.00579087	0.00678941	0.3937	-0.00751638	0.0190981	1.00581	0.992512	1.01928	0.7802
insomnia	Excitatory_control_YIPF7	Wald ratio	1	0.0150808	0.0177074	0.3944	-0.0196257	0.0497873	1.0152	0.980566	1.05105	0.7802
insomnia	OPCs_control_LINC01324	Wald ratio	1	-0.00761997	0.00899843	0.3971	-0.0252569	0.0100169	0.992409	0.975059	1.01007	0.7802
insomnia	Astrocytes_control_PM20D1	Wald ratio	1	0.00872917	0.0102344	0.3937	-0.0113302	0.0287886	1.00877	0.988734	1.02921	0.7802
insomnia	Endothelial_control_PM20D1	Wald ratio	1	0.00556794	0.00652805	0.3937	-0.00722703	0.0183629	1.00558	0.992799	1.01853	0.7802
insomnia	Pericytes_control_PTBP1	Wald ratio	1	-0.00626559	0.00731501	0.3917	-0.020603	0.00807184	0.993754	0.979608	1.0081	0.7802
insomnia	Microglia_control_RASGEF1C	Wald ratio	1	0.00777958	0.00914808	0.3951	-0.0101507	0.0257098	1.00781	0.989901	1.02604	0.7802
insomnia	Oligodendrocytes_control_MSH4	Wald ratio	1	-0.00842767	0.00992908	0.396	-0.0278887	0.0110333	0.991608	0.972497	1.01109	0.7802
insomnia	Astrocytes_control_FREM2	Wald ratio	1	0.00597188	0.00705817	0.3975	-0.00786213	0.0198059	1.00599	0.992169	1.02	0.7802
insomnia	Excitatory_control_CFAP46	Wald ratio	1	0.0113528	0.0134606	0.399	-0.01503	0.0377356	1.01142	0.985082	1.03846	0.7809
insomnia	Oligodendrocytes_control_TMEM50B	Wald ratio	1	0.012459	0.0148129	0.4003	-0.0165744	0.0414923	1.01254	0.983562	1.04237	0.7815
insomnia	Excitatory_control_CLTCL1	Wald ratio	1	-0.0101121	0.0120252	0.4004	-0.0336814	0.0134573	0.989939	0.966879	1.01355	0.7815
insomnia	OPCs_control_TOGARAM2	Wald ratio	1	0.00845967	0.0101137	0.4029	-0.0113633	0.0282826	1.0085	0.988701	1.02869	0.7831
insomnia	Excitatory_control_GPR83	Wald ratio	1	-0.0120066	0.014339	0.4024	-0.040111	0.0160977	0.988065	0.960683	1.01623	0.7831
insomnia	Microglia_control_NLRP4	Wald ratio	1	-0.00643813	0.00768713	0.4023	-0.0215049	0.00862864	0.993583	0.978725	1.00867	0.7831
insomnia	Excitatory_control_ACADS	Wald ratio	1	0.0105125	0.0126458	0.4058	-0.0142732	0.0352983	1.01057	0.985828	1.03593	0.7877
insomnia	Oligodendrocytes_control_AGTRAP	Wald ratio	1	-0.00998244	0.0122255	0.4142	-0.0339445	0.0139796	0.990067	0.966625	1.01408	0.7942
insomnia	Microglia_control_LMO1	Wald ratio	1	-0.00797323	0.0097774	0.4148	-0.0271369	0.0111905	0.992058	0.973228	1.01125	0.7942
insomnia	Excitatory_control_FAM178B	Wald ratio	1	-0.016141	0.0196919	0.4124	-0.054737	0.0224551	0.983989	0.946734	1.02271	0.7942
insomnia	Inhibitory_control_MIR4713HG	Wald ratio	1	0.0103658	0.0126138	0.4112	-0.0143572	0.0350889	1.01042	0.985745	1.03571	0.7942
insomnia	OPCs_control_PM20D1	Wald ratio	1	0.00623822	0.00762036	0.413	-0.00869768	0.0211741	1.00626	0.99134	1.0214	0.7942
insomnia	Oligodendrocytes_control_GREM1	Wald ratio	1	0.00677326	0.00828813	0.4138	-0.00947146	0.023018	1.0068	0.990573	1.02328	0.7942
insomnia	OPCs_control_DEFB134	Wald ratio	1	-0.00635775	0.00772827	0.4107	-0.0215052	0.00878965	0.993662	0.978724	1.00883	0.7942
insomnia	Excitatory_control_IGSF8	Wald ratio	1	0.0199407	0.0244424	0.4146	-0.0279663	0.0678478	1.02014	0.972421	1.0702	0.7942
insomnia	Oligodendrocytes_control_STEAP1B	Wald ratio	1	-0.00848983	0.0104064	0.4146	-0.0288864	0.0119068	0.991546	0.971527	1.01198	0.7942
insomnia	Excitatory_control_PM20D1	Wald ratio	1	0.00544483	0.00665118	0.413	-0.00759149	0.0184812	1.00546	0.992437	1.01865	0.7942
insomnia	Excitatory_control_DNAH17	Wald ratio	1	-0.0162487	0.0200111	0.4168	-0.0554704	0.022973	0.983883	0.94604	1.02324	0.7949
insomnia	Inhibitory_control_PDGFC	Wald ratio	1	0.0120534	0.0148635	0.4174	-0.017079	0.0411858	1.01213	0.983066	1.04205	0.7949
insomnia	Excitatory_control_SCGB3A1	Wald ratio	1	-0.00910196	0.0112143	0.417	-0.031082	0.0128781	0.990939	0.969396	1.01296	0.7949
insomnia	Microglia_control_POU5F1	Wald ratio	1	-0.00662446	0.00816536	0.4172	-0.0226286	0.00937964	0.993397	0.977626	1.00942	0.7949
insomnia	Excitatory_control_THG1L	Wald ratio	1	-0.0203584	0.0252672	0.4204	-0.0698821	0.0291652	0.979847	0.932504	1.02959	0.7965
insomnia	Excitatory_control_GSAP	Wald ratio	1	-0.0160904	0.01997	0.4204	-0.0552315	0.0230508	0.984038	0.946266	1.02332	0.7965
insomnia	OPCs_control_BOC	Wald ratio	1	0.010191	0.0126374	0.42	-0.0145782	0.0349603	1.01024	0.985528	1.03558	0.7965
insomnia	Inhibitory_control_SNX8	Wald ratio	1	-0.00784038	0.00973291	0.4205	-0.0269169	0.0112361	0.99219	0.973442	1.0113	0.7965
insomnia	Excitatory_control_CASP8	Wald ratio	1	0.0078566	0.00979514	0.4225	-0.0113419	0.0270551	1.00789	0.988722	1.02742	0.7992
insomnia	Excitatory_control_MRGPRF	Wald ratio	1	0.00814029	0.0102081	0.4252	-0.0118676	0.0281482	1.00817	0.988203	1.02855	0.8011
insomnia	Oligodendrocytes_control_B3GNTL1	Wald ratio	1	-0.0105665	0.0132392	0.4248	-0.0365155	0.0153824	0.989489	0.964143	1.0155	0.8011
insomnia	Oligodendrocytes_control_ACCS	Wald ratio	1	0.00664452	0.0083306	0.4251	-0.00968345	0.0229725	1.00667	0.990363	1.02324	0.8011
insomnia	Excitatory_control_CERS3	Wald ratio	1	0.00860131	0.0108119	0.4263	-0.0125901	0.0297927	1.00864	0.987489	1.03024	0.8021
insomnia	Microglia_control_DPH5	Wald ratio	1	-0.00867115	0.010921	0.4272	-0.0300762	0.0127339	0.991366	0.970372	1.01282	0.8028
insomnia	Inhibitory_control_IBSP	Wald ratio	1	0.00681737	0.00860666	0.4283	-0.0100517	0.0236864	1.00684	0.989999	1.02397	0.8038
insomnia	Astrocytes_control_FABP6	Wald ratio	1	-0.00770099	0.00993156	0.4381	-0.0271669	0.0117649	0.992329	0.973199	1.01183	0.8055
insomnia	OPCs_control_MIR4300HG	Wald ratio	1	-0.00524759	0.00676459	0.4379	-0.0185062	0.00801101	0.994766	0.981664	1.00804	0.8055
insomnia	Oligodendrocytes_control_U2AF1	Wald ratio	1	0.0042689	0.00551139	0.4386	-0.00653343	0.0150712	1.00428	0.993488	1.01519	0.8055
insomnia	Endothelial_control_U2AF1	Wald ratio	1	0.00628708	0.00811698	0.4386	-0.0096222	0.0221964	1.00631	0.990424	1.02244	0.8055
insomnia	Oligodendrocytes_control_DHCR24	Wald ratio	1	-0.0108389	0.0138872	0.4351	-0.0380579	0.0163801	0.98922	0.962657	1.01651	0.8055
insomnia	Endothelial_control_LINC00336	Wald ratio	1	-0.00596897	0.00765102	0.4353	-0.020965	0.00902702	0.994049	0.979253	1.00907	0.8055
insomnia	Inhibitory_control_ITPR2	Wald ratio	1	-0.0082669	0.01068	0.4389	-0.0291998	0.012666	0.991767	0.971222	1.01275	0.8055
insomnia	Microglia_control_U2AF1	Wald ratio	1	0.00600731	0.00775578	0.4386	-0.00919402	0.0212086	1.00603	0.990848	1.02144	0.8055
insomnia	Oligodendrocytes_control_CPM	Wald ratio	1	0.00707735	0.00908954	0.4362	-0.0107381	0.0248928	1.0071	0.989319	1.02521	0.8055
insomnia	Oligodendrocytes_control_MFGE8	Wald ratio	1	-0.00564132	0.00719024	0.4327	-0.0197342	0.00845156	0.994375	0.980459	1.00849	0.8055
insomnia	Oligodendrocytes_control_XRCC2	Wald ratio	1	0.0104334	0.0132837	0.4322	-0.0156026	0.0364694	1.01049	0.984519	1.03714	0.8055
insomnia	Astrocytes_control_PRKG1	Wald ratio	1	0.00513359	0.006519	0.431	-0.00764365	0.0179108	1.00515	0.992385	1.01807	0.8055
insomnia	Excitatory_control_SLC28A2	Wald ratio	1	-0.0127221	0.0163999	0.4379	-0.0448658	0.0194216	0.987358	0.956126	1.01961	0.8055
insomnia	Oligodendrocytes_control_GATM	Wald ratio	1	-0.00832306	0.0106941	0.4364	-0.0292834	0.0126373	0.991711	0.971141	1.01272	0.8055
insomnia	Endothelial_control_TMEM245	Wald ratio	1	-0.00601788	0.00767853	0.4332	-0.0210678	0.00903205	0.994	0.979153	1.00907	0.8055
insomnia	Excitatory_control_ADAT1	Wald ratio	1	0.015579	0.0199647	0.4352	-0.0235519	0.0547098	1.0157	0.976723	1.05623	0.8055
insomnia	Astrocytes_control_RFWD3	Wald ratio	1	0.0138387	0.0176575	0.4332	-0.0207701	0.0484475	1.01393	0.979444	1.04964	0.8055
insomnia	Excitatory_control_SNX8	Wald ratio	1	-0.00529657	0.00686362	0.4403	-0.0187493	0.00815613	0.994717	0.981425	1.00819	0.807
insomnia	Excitatory_control_YBX3	Wald ratio	1	-0.0095451	0.0123935	0.4412	-0.0338364	0.0147462	0.9905	0.96673	1.01486	0.8076
insomnia	Oligodendrocytes_control_LINC00251	Wald ratio	1	0.00720722	0.00940527	0.4435	-0.0112271	0.0256416	1.00723	0.988836	1.02597	0.8085
insomnia	Excitatory_control_TMTC4	Wald ratio	1	0.0153792	0.0200211	0.4424	-0.0238623	0.0546206	1.0155	0.97642	1.05614	0.8085
insomnia	Oligodendrocytes_control_FNDC7	Wald ratio	1	0.00682339	0.00891024	0.4438	-0.0106407	0.0242875	1.00685	0.989416	1.02458	0.8085
insomnia	Excitatory_control_CYP4F3	Wald ratio	1	0.00907786	0.0118855	0.445	-0.0142177	0.0323734	1.00912	0.985883	1.0329	0.8085
insomnia	Excitatory_control_ZSCAN18	Wald ratio	1	0.0177053	0.0231355	0.4441	-0.0276403	0.063051	1.01786	0.972738	1.06508	0.8085
insomnia	Excitatory_control_RNASEH2B	Wald ratio	1	-0.00792637	0.0103801	0.4451	-0.0282714	0.0124187	0.992105	0.972124	1.0125	0.8085
insomnia	Astrocytes_control_WT1	Wald ratio	1	0.00558368	0.00737037	0.4487	-0.00886225	0.0200296	1.0056	0.991177	1.02023	0.8097
insomnia	Microglia_control_CCL25	Wald ratio	1	0.00590887	0.00784624	0.4514	-0.00946976	0.0212875	1.00593	0.990575	1.02152	0.8097
insomnia	Oligodendrocytes_control_SNX19	Wald ratio	1	-0.00360455	0.00477162	0.45	-0.0129569	0.00574782	0.996402	0.987127	1.00576	0.8097
insomnia	Excitatory_control_OR7D2	Wald ratio	1	-0.00597779	0.00798002	0.4538	-0.0216186	0.00966305	0.99404	0.978613	1.00971	0.8097
insomnia	Inhibitory_control_OR7D2	Wald ratio	1	-0.00674107	0.00899896	0.4538	-0.024379	0.0108969	0.993282	0.975916	1.01096	0.8097
insomnia	Inhibitory_control_APIP	Wald ratio	1	0.00811772	0.0107413	0.4498	-0.0129352	0.0291707	1.00815	0.987148	1.0296	0.8097
insomnia	OPCs_control_APIP	Wald ratio	1	0.00639332	0.00845959	0.4498	-0.0101875	0.0229741	1.00641	0.989864	1.02324	0.8097
insomnia	Oligodendrocytes_control_STX6	Wald ratio	1	0.0100383	0.0132387	0.4483	-0.0159096	0.0359861	1.01009	0.984216	1.03664	0.8097
insomnia	Excitatory_control_LONP1	Wald ratio	1	-0.0108199	0.0143739	0.4516	-0.0389927	0.0173528	0.989238	0.961758	1.0175	0.8097
insomnia	Excitatory_control_GLP2R	Wald ratio	1	-0.00926394	0.0122796	0.4506	-0.033332	0.0148041	0.990779	0.967217	1.01491	0.8097
insomnia	Astrocytes_control_TESK2	Wald ratio	1	0.00612967	0.00817371	0.4533	-0.00989081	0.0221502	1.00615	0.990158	1.0224	0.8097
insomnia	Astrocytes_control_APIP	Wald ratio	1	0.00537274	0.00710916	0.4498	-0.00856122	0.0193067	1.00539	0.991475	1.01949	0.8097
insomnia	Excitatory_control_LINC02482	Wald ratio	1	0.0091435	0.0120215	0.4469	-0.0144187	0.0327057	1.00919	0.985685	1.03325	0.8097
insomnia	Oligodendrocytes_control_OR7D2	Wald ratio	1	-0.00771167	0.0102946	0.4538	-0.0278892	0.0124658	0.992318	0.972496	1.01254	0.8097
insomnia	Excitatory_control_ACOT12	Wald ratio	1	0.0124276	0.0166417	0.4552	-0.0201901	0.0450453	1.01251	0.980012	1.04608	0.8111
insomnia	Oligodendrocytes_control_SLC8A3	Wald ratio	1	-0.00485063	0.00650266	0.4557	-0.0175958	0.00789458	0.995161	0.982558	1.00793	0.8111
insomnia	Oligodendrocytes_control_PDE1A	Wald ratio	1	-0.00410234	0.00551541	0.457	-0.0149125	0.00670786	0.995906	0.985198	1.00673	0.8124
insomnia	Oligodendrocytes_control_APIP	Wald ratio	1	0.00439739	0.00601586	0.4648	-0.00739369	0.0161885	1.00441	0.992634	1.01632	0.8159
insomnia	Excitatory_control_CLUL1	Wald ratio	1	-0.00869851	0.0118442	0.4627	-0.0319132	0.0145162	0.991339	0.968591	1.01462	0.8159
insomnia	Excitatory_control_LATS1	Wald ratio	1	-0.0105567	0.0143745	0.4627	-0.0387307	0.0176172	0.989499	0.96201	1.01777	0.8159
insomnia	Oligodendrocytes_control_NIPA1	Wald ratio	1	0.0110615	0.0151598	0.4656	-0.0186518	0.0407748	1.01112	0.981521	1.04162	0.8159
insomnia	Inhibitory_control_KIF6	Wald ratio	1	-0.00853757	0.0115811	0.461	-0.0312364	0.0141613	0.991499	0.969246	1.01426	0.8159
insomnia	Excitatory_control_POLQ	Wald ratio	1	-0.0114842	0.0157568	0.4661	-0.0423675	0.0193992	0.988582	0.958517	1.01959	0.8159
insomnia	Inhibitory_control_CLUL1	Wald ratio	1	-0.00720137	0.00980568	0.4627	-0.0264205	0.0120178	0.992824	0.973925	1.01209	0.8159
insomnia	Excitatory_control_APIP	Wald ratio	1	0.00434554	0.00594493	0.4648	-0.00730652	0.0159976	1.00435	0.99272	1.01613	0.8159
insomnia	Excitatory_control_PLEKHH2	Wald ratio	1	0.00897106	0.0122154	0.4627	-0.014971	0.0329131	1.00901	0.98514	1.03346	0.8159
insomnia	Excitatory_control_KIF6	Wald ratio	1	-0.00866711	0.0117568	0.461	-0.0317104	0.0143762	0.99137	0.968787	1.01448	0.8159
insomnia	Microglia_control_MAB21L2	Wald ratio	1	-0.00585889	0.00802067	0.4651	-0.0215794	0.00986161	0.994158	0.978652	1.00991	0.8159
insomnia	Excitatory_control_PXYLP1	Wald ratio	1	-0.0138574	0.01903	0.4665	-0.0511561	0.0234414	0.986238	0.95013	1.02372	0.8159
insomnia	Oligodendrocytes_control_ZNF566	Wald ratio	1	-0.0148511	0.0202989	0.4644	-0.0546369	0.0249347	0.985259	0.946829	1.02525	0.8159
insomnia	Excitatory_control_GRID2IP	Wald ratio	1	0.0115647	0.0160394	0.4709	-0.0198726	0.0430019	1.01163	0.980324	1.04394	0.8172
insomnia	Astrocytes_control_FBXO7	Wald ratio	1	-0.0113339	0.0158155	0.4736	-0.0423322	0.0196644	0.98873	0.958551	1.01986	0.8172
insomnia	Oligodendrocytes_control_PTPN1	Wald ratio	1	-0.0109102	0.0152276	0.4737	-0.0407563	0.018936	0.989149	0.960063	1.01912	0.8172
insomnia	Excitatory_control_KIF20B	Wald ratio	1	0.014683	0.0203551	0.4707	-0.025213	0.054579	1.01479	0.975102	1.0561	0.8172
insomnia	Endothelial_control_HPSE2	Wald ratio	1	0.00670252	0.00938883	0.4753	-0.0116996	0.0251046	1.00673	0.988369	1.02542	0.8172
insomnia	Excitatory_control_SLC39A8	Wald ratio	1	-0.00837438	0.0117281	0.4752	-0.0313615	0.0146127	0.991661	0.969125	1.01472	0.8172
insomnia	Inhibitory_control_TRIM5	Wald ratio	1	0.00858146	0.0118618	0.4694	-0.0146676	0.0318305	1.00862	0.985439	1.03234	0.8172
insomnia	Excitatory_control_CHPT1	Wald ratio	1	0.00934766	0.0129851	0.4716	-0.0161031	0.0347984	1.00939	0.984026	1.03541	0.8172
insomnia	Oligodendrocytes_control_PPFIBP2	Wald ratio	1	0.00861276	0.0119184	0.4699	-0.0147474	0.0319729	1.00865	0.985361	1.03249	0.8172
insomnia	Oligodendrocytes_control_PI16	Wald ratio	1	-0.00380543	0.00529338	0.4722	-0.0141805	0.0065696	0.996202	0.98592	1.00659	0.8172
insomnia	Excitatory_control_CNKSR1	Wald ratio	1	0.00964838	0.0133545	0.47	-0.0165265	0.0358233	1.0097	0.983609	1.03647	0.8172
insomnia	Excitatory_control_LSG1	Wald ratio	1	-0.0159089	0.0220398	0.4704	-0.0591069	0.027289	0.984217	0.942606	1.02766	0.8172
insomnia	OPCs_control_PAX8	Wald ratio	1	-0.00616769	0.00858899	0.4727	-0.0230021	0.0106667	0.993851	0.97726	1.01072	0.8172
insomnia	Oligodendrocytes_control_BAIAP2L2	Wald ratio	1	-0.0102026	0.0143015	0.4756	-0.0382335	0.0178283	0.989849	0.962488	1.01799	0.8172
insomnia	Oligodendrocytes_control_PPFIA1	Wald ratio	1	-0.0144882	0.0203225	0.4759	-0.0543203	0.025344	0.985616	0.947129	1.02567	0.8172
insomnia	Oligodendrocytes_control_TMEM232	Wald ratio	1	0.0102396	0.0144152	0.4775	-0.0180143	0.0384934	1.01029	0.982147	1.03924	0.8187
insomnia	Inhibitory_control_RNASEH2B	Wald ratio	1	-0.00937914	0.0132159	0.4779	-0.0352824	0.0165241	0.990665	0.965333	1.01666	0.8187
insomnia	Astrocytes_control_GAD1	Wald ratio	1	0.0102583	0.0144844	0.4788	-0.0181311	0.0386477	1.01031	0.982032	1.0394	0.8192
insomnia	Oligodendrocytes_control_C17orf97	Wald ratio	1	-0.0044799	0.00633698	0.4796	-0.0169004	0.00794058	0.99553	0.983242	1.00797	0.8196
insomnia	Astrocytes_control_ZNF404	Wald ratio	1	-0.0128596	0.0182986	0.4822	-0.0487248	0.0230055	0.987223	0.952443	1.02327	0.8231
insomnia	Microglia_control_PAX8	Wald ratio	1	-0.00496535	0.00708319	0.4833	-0.0188484	0.00891771	0.995047	0.981328	1.00896	0.8239
insomnia	Excitatory_control_CFAP97D2	Wald ratio	1	0.00848206	0.0121945	0.4867	-0.0154191	0.0323832	1.00852	0.984699	1.03291	0.8287
insomnia	Excitatory_control_NARS2	Wald ratio	1	0.00916164	0.013226	0.4885	-0.0167614	0.0350847	1.0092	0.983378	1.03571	0.8291
insomnia	Excitatory_control_CENPK	Wald ratio	1	0.00765925	0.0110597	0.4886	-0.0140178	0.0293363	1.00769	0.98608	1.02977	0.8291
insomnia	Excitatory_control_CDON	Wald ratio	1	-0.00815752	0.0117819	0.4887	-0.03125	0.014935	0.991876	0.969233	1.01505	0.8291
insomnia	Endothelial_control_EXOC3L2	Wald ratio	1	0.00521322	0.00755028	0.4899	-0.00958532	0.0200118	1.00523	0.99046	1.02021	0.8302
insomnia	Oligodendrocytes_control_TMEM108	Wald ratio	1	0.00679929	0.00987237	0.491	-0.0125506	0.0261491	1.00682	0.987528	1.02649	0.8311
insomnia	Astrocytes_control_GSTM5	Wald ratio	1	-0.00614297	0.00895656	0.4928	-0.0236978	0.0114119	0.993876	0.976581	1.01148	0.8313
insomnia	Oligodendrocytes_control_FAM171B	Wald ratio	1	0.00388355	0.00565182	0.492	-0.00719403	0.0149611	1.00389	0.992832	1.01507	0.8313
insomnia	Astrocytes_control_TOGARAM2	Wald ratio	1	-0.00694545	0.0101289	0.4929	-0.0267982	0.0129073	0.993079	0.973558	1.01299	0.8313
insomnia	Microglia_control_MAPK1	Wald ratio	1	0.00536832	0.00784161	0.4936	-0.0100012	0.0207379	1.00538	0.990049	1.02095	0.8315
insomnia	Oligodendrocytes_control_HIBADH	Wald ratio	1	-0.0096634	0.0142537	0.4978	-0.0376007	0.0182739	0.990383	0.963097	1.01844	0.8328
insomnia	Excitatory_control_PTDSS2	Wald ratio	1	-0.00943954	0.0139268	0.4979	-0.036736	0.017857	0.990605	0.963931	1.01802	0.8328
insomnia	Inhibitory_control_U2AF1	Wald ratio	1	0.00377185	0.00555839	0.4974	-0.0071226	0.0146663	1.00378	0.992903	1.01477	0.8328
insomnia	Excitatory_control_FUT2	Wald ratio	1	-0.0104185	0.0152785	0.4953	-0.0403644	0.0195275	0.989636	0.960439	1.01972	0.8328
insomnia	Astrocytes_control_U2AF1	Wald ratio	1	0.00401635	0.00589811	0.4959	-0.00754395	0.0155766	1.00402	0.992484	1.0157	0.8328
insomnia	Oligodendrocytes_control_ITGAV	Wald ratio	1	-0.004887	0.00719337	0.4969	-0.018986	0.00921201	0.995125	0.981193	1.00925	0.8328
insomnia	Oligodendrocytes_control_NPAP1	Wald ratio	1	0.00452025	0.00669861	0.4998	-0.00860902	0.0176495	1.00453	0.991428	1.01781	0.834
insomnia	Oligodendrocytes_control_PWRN1	Wald ratio	1	0.00335625	0.00497366	0.4998	-0.00639212	0.0131046	1.00336	0.993628	1.01319	0.834
insomnia	Astrocytes_control_CYP4F3	Wald ratio	1	0.00717642	0.0106746	0.5014	-0.0137458	0.0280986	1.0072	0.986348	1.0285	0.8357
insomnia	Oligodendrocytes_control_CTSO	Wald ratio	1	0.00949405	0.0142182	0.5043	-0.0183736	0.0373617	1.00954	0.981794	1.03807	0.838
insomnia	Oligodendrocytes_control_FTCD	Wald ratio	1	0.00504924	0.00755106	0.5037	-0.00975084	0.0198493	1.00506	0.990297	1.02005	0.838
insomnia	Excitatory_control_CCDC40	Wald ratio	1	0.00849981	0.0127382	0.5046	-0.0164671	0.0334667	1.00854	0.983668	1.03403	0.838
insomnia	Oligodendrocytes_control_LINC02268	Wald ratio	1	-0.00439113	0.00659311	0.5054	-0.0173136	0.00853137	0.995619	0.982835	1.00857	0.8384
insomnia	OPCs_control_KLHL1	Wald ratio	1	-0.00504311	0.00760596	0.5073	-0.0199508	0.00986456	0.99497	0.980247	1.00991	0.8405
insomnia	Astrocytes_control_RNASEH2B	Wald ratio	1	-0.00915017	0.0138491	0.5088	-0.0362943	0.017994	0.990892	0.964356	1.01816	0.8411
insomnia	Astrocytes_control_TEAD2	Wald ratio	1	0.00634342	0.00959642	0.5086	-0.0124656	0.0251524	1.00636	0.987612	1.02547	0.8411
insomnia	Excitatory_control_U2AF1	Wald ratio	1	0.00328062	0.00500303	0.512	-0.00652532	0.0130866	1.00329	0.993496	1.01317	0.8423
insomnia	Oligodendrocytes_control_LINC02482	Wald ratio	1	0.00953716	0.0145135	0.5111	-0.0189092	0.0379835	1.00958	0.981268	1.03871	0.8423
insomnia	Inhibitory_control_OR51E2	Wald ratio	1	-0.00252546	0.00387431	0.5145	-0.0101191	0.00506819	0.997478	0.989932	1.00508	0.8423
insomnia	OPCs_control_CYP4F11	Wald ratio	1	-0.00352621	0.00542634	0.5158	-0.0141618	0.00710941	0.99648	0.985938	1.00713	0.8423
insomnia	Inhibitory_control_CTSS	Wald ratio	1	0.00656023	0.0100497	0.5139	-0.0131372	0.0262577	1.00658	0.986949	1.02661	0.8423
insomnia	Oligodendrocytes_control_HLF	Wald ratio	1	0.00696813	0.0106822	0.5142	-0.013969	0.0279052	1.00699	0.986128	1.0283	0.8423
insomnia	Oligodendrocytes_control_STX19	Wald ratio	1	0.00564676	0.00864009	0.5134	-0.0112878	0.0225813	1.00566	0.988776	1.02284	0.8423
insomnia	Inhibitory_control_CCDC66	Wald ratio	1	0.00709642	0.0108299	0.5123	-0.0141302	0.0283231	1.00712	0.985969	1.02873	0.8423
insomnia	Microglia_control_CPVL	Wald ratio	1	0.00627431	0.0096369	0.515	-0.012614	0.0251626	1.00629	0.987465	1.02548	0.8423
insomnia	Excitatory_control_CYP4V2	Wald ratio	1	0.0124336	0.0191471	0.5161	-0.0250948	0.0499619	1.01251	0.975217	1.05123	0.8423
insomnia	Excitatory_control_LCN15	Wald ratio	1	-0.00556903	0.00854143	0.5144	-0.0223102	0.0111722	0.994446	0.977937	1.01123	0.8423
insomnia	OPCs_control_MFGE8	Wald ratio	1	-0.00856042	0.0132679	0.5188	-0.0345656	0.0174447	0.991476	0.966025	1.0176	0.8438
insomnia	OPCs_control_U2AF1	Wald ratio	1	0.00371059	0.00574286	0.5182	-0.00754542	0.0149666	1.00372	0.992483	1.01508	0.8438
insomnia	Pericytes_control_U2AF1	Wald ratio	1	0.00457082	0.00707424	0.5182	-0.00929468	0.0184363	1.00458	0.990748	1.01861	0.8438
insomnia	Oligodendrocytes_control_TMEM132C	Wald ratio	1	0.00462808	0.00718688	0.5196	-0.0094582	0.0187144	1.00464	0.990586	1.01889	0.8441
insomnia	Excitatory_control_FTCD	Wald ratio	1	0.0081045	0.0127775	0.5259	-0.0169395	0.0331485	1.00814	0.983203	1.0337	0.845
insomnia	OPCs_control_LINC02613	Wald ratio	1	0.00605201	0.00945462	0.5221	-0.012479	0.0245831	1.00607	0.987599	1.02489	0.845
insomnia	Astrocytes_control_LONP1	Wald ratio	1	-0.00884358	0.0137958	0.5215	-0.0358833	0.0181962	0.991195	0.964753	1.01836	0.845
insomnia	Inhibitory_control_SOHLH2	Wald ratio	1	-0.00664353	0.0104792	0.5261	-0.0271829	0.0138958	0.993378	0.973183	1.01399	0.845
insomnia	Oligodendrocytes_control_MAPRE2	Wald ratio	1	0.00772727	0.0120515	0.5214	-0.0158936	0.0313481	1.00776	0.984232	1.03184	0.845
insomnia	Excitatory_control_DRICH1	Wald ratio	1	-0.0091424	0.0143895	0.5252	-0.0373459	0.0190611	0.990899	0.963343	1.01924	0.845
insomnia	Excitatory_control_MRPL23	Wald ratio	1	0.00692224	0.0108245	0.5225	-0.0142938	0.0281383	1.00695	0.985808	1.02854	0.845
insomnia	Excitatory_control_SCFD1	Wald ratio	1	-0.00888718	0.0140183	0.5261	-0.036363	0.0185886	0.991152	0.96429	1.01876	0.845
insomnia	Oligodendrocytes_control_CNBD1	Wald ratio	1	-0.00453228	0.00713696	0.5254	-0.0185207	0.00945616	0.995478	0.98165	1.0095	0.845
insomnia	Excitatory_control_LINC02398	Wald ratio	1	-0.00819091	0.0128423	0.5236	-0.0333619	0.01698	0.991843	0.967189	1.01713	0.845
insomnia	Excitatory_control_NEK1	Wald ratio	1	-0.00816773	0.0129774	0.5291	-0.0336034	0.017268	0.991866	0.966955	1.01742	0.846
insomnia	Pericytes_control_PEX26	Wald ratio	1	0.004482	0.00714903	0.5307	-0.0095301	0.0184941	1.00449	0.990515	1.01867	0.846
insomnia	OPCs_control_C2orf74	Wald ratio	1	-0.00764964	0.0121101	0.5276	-0.0313855	0.0160862	0.99238	0.969102	1.01622	0.846
insomnia	Inhibitory_control_NEK1	Wald ratio	1	-0.00743074	0.0118064	0.5291	-0.0305714	0.0157099	0.992597	0.969891	1.01583	0.846
insomnia	Inhibitory_control_TTC23	Wald ratio	1	0.00763104	0.012169	0.5306	-0.0162201	0.0314822	1.00766	0.983911	1.03198	0.846
insomnia	Oligodendrocytes_control_NEK1	Wald ratio	1	-0.006865	0.0109075	0.5291	-0.0282438	0.0145138	0.993159	0.972151	1.01462	0.846
insomnia	Excitatory_control_RAG2	Wald ratio	1	0.00814766	0.0130023	0.5309	-0.0173368	0.0336321	1.00818	0.982813	1.0342	0.846
insomnia	Oligodendrocytes_control_CENPP	Wald ratio	1	0.00331558	0.00546834	0.5443	-0.00740236	0.0140335	1.00332	0.992625	1.01413	0.851
insomnia	Astrocytes_control_ZNF534	Wald ratio	1	0.00572406	0.0093591	0.5408	-0.0126198	0.0240679	1.00574	0.98746	1.02436	0.851
insomnia	Microglia_control_TMEM163	Wald ratio	1	-0.00545568	0.0089468	0.542	-0.0229914	0.01208	0.994559	0.977271	1.01215	0.851
insomnia	Excitatory_control_SPON2	Wald ratio	1	0.00915621	0.0148569	0.5377	-0.0199632	0.0382757	1.0092	0.980235	1.03902	0.851
insomnia	Inhibitory_control_APOLD1	Wald ratio	1	-0.00611081	0.00995699	0.5394	-0.0256265	0.0134049	0.993908	0.974699	1.0135	0.851
insomnia	Inhibitory_control_CENPP	Wald ratio	1	0.0044335	0.0073121	0.5443	-0.00989822	0.0187652	1.00444	0.990151	1.01894	0.851
insomnia	Excitatory_control_KLRD1	Wald ratio	1	-0.00989169	0.0161494	0.5402	-0.0415446	0.0217612	0.990157	0.959307	1.022	0.851
insomnia	Excitatory_control_CENPP	Wald ratio	1	0.00380729	0.0062793	0.5443	-0.00850014	0.0161147	1.00381	0.991536	1.01625	0.851
insomnia	Inhibitory_control_GSTM5	Wald ratio	1	-0.00619458	0.0100885	0.5392	-0.025968	0.0135789	0.993825	0.974366	1.01367	0.851
insomnia	Microglia_control_RBM19	Wald ratio	1	0.00458483	0.0073884	0.5349	-0.00989645	0.0190661	1.0046	0.990152	1.01925	0.851
insomnia	Excitatory_control_ECM2	Wald ratio	1	0.0103552	0.0170786	0.5443	-0.0231189	0.0438293	1.01041	0.977146	1.0448	0.851
insomnia	OPCs_control_CENPP	Wald ratio	1	0.00674756	0.0111287	0.5443	-0.0150646	0.0285597	1.00677	0.985048	1.02897	0.851
insomnia	Endothelial_control_FAM118A	Wald ratio	1	-0.00424254	0.00697635	0.5431	-0.0179162	0.0094311	0.995766	0.982243	1.00948	0.851
insomnia	Excitatory_control_C2orf74	Wald ratio	1	-0.00629293	0.0103351	0.5426	-0.0265498	0.013964	0.993727	0.9738	1.01406	0.851
insomnia	Oligodendrocytes_control_ASPN	Wald ratio	1	0.00816723	0.0134701	0.5443	-0.0182341	0.0345686	1.0082	0.981931	1.03517	0.851
insomnia	Excitatory_control_OGN	Wald ratio	1	0.0107729	0.0177675	0.5443	-0.0240515	0.0455972	1.01083	0.976235	1.04665	0.851
insomnia	Excitatory_control_ASPN	Wald ratio	1	0.0121908	0.020106	0.5443	-0.0272171	0.0515986	1.01227	0.97315	1.05295	0.851
insomnia	Excitatory_control_ANKRD36B	Wald ratio	1	0.00345419	0.00576265	0.5489	-0.00784061	0.014749	1.00346	0.99219	1.01486	0.8512
insomnia	Oligodendrocytes_control_CYP4F11	Wald ratio	1	-0.00395596	0.00657671	0.5475	-0.0168463	0.00893439	0.996052	0.983295	1.00897	0.8512
insomnia	Endothelial_control_CCDC122	Wald ratio	1	0.00568956	0.00953247	0.5506	-0.0129941	0.0243732	1.00571	0.98709	1.02467	0.8512
insomnia	Oligodendrocytes_control_NAPRT	Wald ratio	1	0.00801293	0.0134251	0.5506	-0.0183003	0.0343261	1.00805	0.981866	1.03492	0.8512
insomnia	Excitatory_control_AQP7	Wald ratio	1	-0.00598967	0.0100454	0.551	-0.0256786	0.0136992	0.994028	0.974648	1.01379	0.8512
insomnia	OPCs_control_ANKRD36B	Wald ratio	1	0.00833009	0.0138972	0.5489	-0.0189083	0.0355685	1.00836	0.981269	1.03621	0.8512
insomnia	Oligodendrocytes_control_LLPH	Wald ratio	1	0.00698003	0.0116332	0.5485	-0.015821	0.0297811	1.007	0.984303	1.03023	0.8512
insomnia	Inhibitory_control_ANKRD36B	Wald ratio	1	0.00400467	0.00668103	0.5489	-0.00909015	0.0170995	1.00401	0.990951	1.01725	0.8512
insomnia	Excitatory_control_PILRB	Wald ratio	1	-0.00971446	0.0161743	0.5481	-0.0414161	0.0219872	0.990333	0.95943	1.02223	0.8512
insomnia	Excitatory_control_GINS3	Wald ratio	1	0.00545151	0.00913135	0.5505	-0.0124459	0.023349	1.00547	0.987631	1.02362	0.8512
insomnia	OPCs_control_NAPRT	Wald ratio	1	0.00759009	0.0127167	0.5506	-0.0173346	0.0325148	1.00762	0.982815	1.03305	0.8512
insomnia	Excitatory_control_ZDHHC20	Wald ratio	1	-0.0091168	0.0154019	0.5539	-0.0393045	0.021071	0.990925	0.961458	1.02129	0.8519
insomnia	OPCs_control_C17orf97	Wald ratio	1	-0.00509832	0.00860442	0.5535	-0.021963	0.0117663	0.994915	0.978276	1.01184	0.8519
insomnia	Excitatory_control_C17orf97	Wald ratio	1	-0.00964464	0.0162772	0.5535	-0.041548	0.0222587	0.990402	0.959303	1.02251	0.8519
insomnia	Oligodendrocytes_control_CCDC163	Wald ratio	1	-0.00493796	0.00833378	0.5535	-0.0212722	0.0113962	0.995074	0.978952	1.01146	0.8519
insomnia	Excitatory_control_FAM120B	Wald ratio	1	-0.0079966	0.0135813	0.556	-0.034616	0.0186228	0.992035	0.965976	1.0188	0.8533
insomnia	Excitatory_control_RSPO4	Wald ratio	1	0.0102658	0.0174354	0.556	-0.0239075	0.0444392	1.01032	0.976376	1.04544	0.8533
insomnia	Oligodendrocytes_control_MYOM2	Wald ratio	1	0.00717893	0.0122143	0.5567	-0.016761	0.0311189	1.0072	0.983379	1.03161	0.8534
insomnia	Excitatory_control_UPK1A	Wald ratio	1	0.00655179	0.0111727	0.5576	-0.0153467	0.0284503	1.00657	0.98477	1.02886	0.8536
insomnia	OPCs_control_CPQ	Wald ratio	1	-0.00403225	0.00689189	0.5585	-0.0175404	0.00947586	0.995976	0.982613	1.00952	0.8536
insomnia	Excitatory_control_AVPR1A	Wald ratio	1	0.0059929	0.0102456	0.5586	-0.0140885	0.0260743	1.00601	0.98601	1.02642	0.8536
insomnia	Astrocytes_control_FRG1-DT	Wald ratio	1	0.00904993	0.0154996	0.5593	-0.0213293	0.0394292	1.00909	0.978897	1.04022	0.8537
insomnia	Oligodendrocytes_control_NCOA7	Wald ratio	1	-0.00345934	0.00594743	0.5608	-0.0151163	0.00819762	0.996547	0.984997	1.00823	0.8542
insomnia	Excitatory_control_CFAP300	Wald ratio	1	-0.00939179	0.0161261	0.5603	-0.040999	0.0222154	0.990652	0.95983	1.02246	0.8542
insomnia	Oligodendrocytes_control_ECM2	Wald ratio	1	0.00889567	0.0153525	0.5623	-0.0211952	0.0389865	1.00894	0.979028	1.03976	0.8555
insomnia	Excitatory_control_MRAS	Wald ratio	1	-0.0121771	0.0211346	0.5645	-0.0536008	0.0292466	0.987897	0.94781	1.02968	0.8555
insomnia	Oligodendrocytes_control_LSS	Wald ratio	1	0.00444696	0.00771416	0.5643	-0.0106728	0.0195667	1.00446	0.989384	1.01976	0.8555
insomnia	Excitatory_control_TIMM44	Wald ratio	1	-0.00893412	0.0154425	0.5629	-0.0392015	0.0213333	0.991106	0.961557	1.02156	0.8555
insomnia	Inhibitory_control_FAM118A	Wald ratio	1	-0.00632581	0.0109847	0.5647	-0.0278558	0.0152042	0.993694	0.972529	1.01532	0.8555
insomnia	Oligodendrocytes_control_ABCC4	Wald ratio	1	0.00337559	0.00588584	0.5663	-0.00816067	0.0149118	1.00338	0.991873	1.01502	0.8561
insomnia	Excitatory_control_SOHLH2	Wald ratio	1	0.00874129	0.0152182	0.5657	-0.0210864	0.038569	1.00878	0.979134	1.03932	0.8561
insomnia	Oligodendrocytes_control_PILRB	Wald ratio	1	-0.0110133	0.0193428	0.5691	-0.0489252	0.0268985	0.989047	0.952252	1.02726	0.8583
insomnia	Oligodendrocytes_control_IGHMBP2	Wald ratio	1	0.00850418	0.0149359	0.5691	-0.0207702	0.0377786	1.00854	0.979444	1.0385	0.8583
insomnia	Inhibitory_control_FRG1-DT	Wald ratio	1	0.00627755	0.0110396	0.5696	-0.01536	0.0279151	1.0063	0.984757	1.02831	0.8583
insomnia	Oligodendrocytes_control_ABCA8	Wald ratio	1	-0.00558434	0.00983835	0.5703	-0.0248675	0.0136988	0.994431	0.975439	1.01379	0.8585
insomnia	Excitatory_control_PAX8	Wald ratio	1	-0.00513628	0.00914847	0.5745	-0.0230673	0.0127947	0.994877	0.977197	1.01288	0.8639
insomnia	Excitatory_control_LINC02150	Wald ratio	1	0.00388889	0.00698318	0.5776	-0.00979814	0.0175759	1.0039	0.99025	1.01773	0.8667
insomnia	Inhibitory_control_LINC02150	Wald ratio	1	0.0042071	0.00755458	0.5776	-0.0105999	0.0190141	1.00422	0.989456	1.0192	0.8667
insomnia	OPCs_control_ZNF534	Wald ratio	1	0.00766842	0.0138903	0.5809	-0.0195566	0.0348934	1.0077	0.980633	1.03551	0.8671
insomnia	Inhibitory_control_ZNF534	Wald ratio	1	0.00971714	0.0176013	0.5809	-0.0247813	0.0442156	1.00976	0.975523	1.04521	0.8671
insomnia	Excitatory_control_ZNF534	Wald ratio	1	0.0113497	0.0205584	0.5809	-0.0289448	0.0516441	1.01141	0.97147	1.053	0.8671
insomnia	Excitatory_control_FRG1-DT	Wald ratio	1	0.00391994	0.00705562	0.5785	-0.00990907	0.0177489	1.00393	0.99014	1.01791	0.8671
insomnia	Astrocytes_control_UST	Wald ratio	1	-0.00585619	0.0105965	0.5805	-0.0266253	0.0149129	0.994161	0.973726	1.01502	0.8671
insomnia	Oligodendrocytes_control_RFPL3S	Wald ratio	1	0.00716732	0.0130412	0.5826	-0.0183934	0.0327281	1.00719	0.981775	1.03327	0.8687
insomnia	Excitatory_control_ZNF846	Wald ratio	1	-0.00860744	0.0156907	0.5833	-0.0393611	0.0221463	0.991429	0.961403	1.02239	0.8688
insomnia	Oligodendrocytes_control_ZNF404	Wald ratio	1	-0.00618878	0.011363	0.586	-0.0284603	0.0160828	0.99383	0.971941	1.01621	0.8719
insomnia	Excitatory_control_LSM7	Wald ratio	1	-0.0100349	0.0185235	0.588	-0.0463409	0.0262712	0.990015	0.954716	1.02662	0.874
insomnia	Excitatory_control_CTSO	Wald ratio	1	-0.00977804	0.0183188	0.5935	-0.0456829	0.0261268	0.99027	0.955345	1.02647	0.8747
insomnia	Excitatory_control_ETFDH	Wald ratio	1	0.0120386	0.0228942	0.599	-0.0328339	0.0569112	1.01211	0.967699	1.05856	0.8747
insomnia	Astrocytes_control_HLA-DOB	Wald ratio	1	-0.00436818	0.00836425	0.6015	-0.0207621	0.0120257	0.995641	0.979452	1.0121	0.8747
insomnia	Inhibitory_control_C9orf72	Wald ratio	1	0.00630903	0.0119653	0.598	-0.0171429	0.029761	1.00633	0.983003	1.03021	0.8747
insomnia	Excitatory_control_C9orf72	Wald ratio	1	0.00899584	0.0170609	0.598	-0.0244435	0.0424352	1.00904	0.975853	1.04335	0.8747
insomnia	Oligodendrocytes_control_HLA-DOB	Wald ratio	1	-0.00435449	0.00833803	0.6015	-0.020697	0.011988	0.995655	0.979516	1.01206	0.8747
insomnia	Excitatory_control_CDC7	Wald ratio	1	-0.00909358	0.0172651	0.5984	-0.0429332	0.024746	0.990948	0.957975	1.02505	0.8747
insomnia	Astrocytes_control_C17orf97	Wald ratio	1	-0.00565124	0.010709	0.5977	-0.0266408	0.0153383	0.994365	0.973711	1.01546	0.8747
insomnia	Endothelial_control_ZNF732	Wald ratio	1	0.00334652	0.00640796	0.6015	-0.00921308	0.0159061	1.00335	0.990829	1.01603	0.8747
insomnia	OPCs_control_HLA-DOB	Wald ratio	1	-0.00501461	0.00960204	0.6015	-0.0238346	0.0138054	0.994998	0.976447	1.0139	0.8747
insomnia	Excitatory_control_ZNF266	Wald ratio	1	0.00614307	0.0115903	0.5961	-0.016574	0.0288601	1.00616	0.983563	1.02928	0.8747
insomnia	Excitatory_control_HLA-DOB	Wald ratio	1	-0.00323316	0.00619089	0.6015	-0.0153673	0.00890098	0.996772	0.98475	1.00894	0.8747
insomnia	Oligodendrocytes_control_DDX25	Wald ratio	1	-0.00406334	0.00776558	0.6008	-0.0192839	0.0111572	0.995945	0.980901	1.01122	0.8747
insomnia	Excitatory_control_ALDH7A1	Wald ratio	1	0.0154329	0.0286334	0.5899	-0.0406886	0.0715543	1.01555	0.960128	1.07418	0.8747
insomnia	Astrocytes_control_ARHGAP28	Wald ratio	1	-0.00643567	0.0122188	0.5984	-0.0303845	0.0175131	0.993585	0.970072	1.01767	0.8747
insomnia	Inhibitory_control_HLA-DOB	Wald ratio	1	-0.00435881	0.00834631	0.6015	-0.0207176	0.0119999	0.995651	0.979496	1.01207	0.8747
insomnia	Inhibitory_control_TPM2	Wald ratio	1	-0.00689432	0.0130717	0.5979	-0.0325149	0.0187262	0.993129	0.968008	1.0189	0.8747
insomnia	Inhibitory_control_SPINK9	Wald ratio	1	-0.00546078	0.0101562	0.5908	-0.025367	0.0144455	0.994554	0.974952	1.01455	0.8747
insomnia	Excitatory_control_ARHGAP25	Wald ratio	1	-0.00630654	0.0118536	0.5947	-0.0295395	0.0169264	0.993713	0.970893	1.01707	0.8747
insomnia	Astrocytes_control_CCDC122	Wald ratio	1	0.00461517	0.0086863	0.5952	-0.01241	0.0216403	1.00463	0.987667	1.02188	0.8747
insomnia	OPCs_control_SHISA9	Wald ratio	1	-0.00428567	0.00800304	0.5923	-0.0199716	0.0114003	0.995723	0.980226	1.01147	0.8747
insomnia	Oligodendrocytes_control_ARHGAP42	Wald ratio	1	-0.00509186	0.00984733	0.6051	-0.0243926	0.0142089	0.994921	0.975902	1.01431	0.8791
insomnia	Inhibitory_control_GSTM3	Wald ratio	1	0.00864281	0.0168828	0.6087	-0.0244475	0.0417331	1.00868	0.975849	1.04262	0.8807
insomnia	Oligodendrocytes_control_FAM118A	Wald ratio	1	-0.00529912	0.0103081	0.6072	-0.0255029	0.0149047	0.994715	0.97482	1.01502	0.8807
insomnia	Oligodendrocytes_control_BAALC	Wald ratio	1	-0.00354284	0.00693216	0.6093	-0.0171299	0.0100442	0.996463	0.983016	1.01009	0.8807
insomnia	Oligodendrocytes_control_SLC35E3	Wald ratio	1	-0.00932866	0.018248	0.6092	-0.0450947	0.0264374	0.990715	0.955907	1.02679	0.8807
insomnia	Excitatory_control_GSTM3	Wald ratio	1	0.00472981	0.00923918	0.6087	-0.013379	0.0228386	1.00474	0.98671	1.0231	0.8807
insomnia	Endothelial_control_GREM2	Wald ratio	1	-0.00522611	0.0102515	0.6102	-0.0253191	0.0148669	0.994788	0.974999	1.01498	0.8811
insomnia	OPCs_control_LINC00648	Wald ratio	1	-0.00360409	0.00709161	0.6113	-0.0175036	0.0102955	0.996402	0.982649	1.01035	0.8817
insomnia	Oligodendrocytes_control_TIMM44	Wald ratio	1	-0.00389298	0.00771628	0.6139	-0.0190169	0.0112309	0.996115	0.981163	1.01129	0.8818
insomnia	Excitatory_control_GNA15	Wald ratio	1	0.00662444	0.0131973	0.6157	-0.0192423	0.0324912	1.00665	0.980942	1.03302	0.8818
insomnia	OPCs_control_KLRC2	Wald ratio	1	0.00490668	0.00976687	0.6154	-0.0142364	0.0240497	1.00492	0.985864	1.02434	0.8818
insomnia	Astrocytes_control_CES1	Wald ratio	1	-0.00408606	0.00806484	0.6124	-0.0198932	0.011721	0.995922	0.980303	1.01179	0.8818
insomnia	Excitatory_control_CCDC125	Wald ratio	1	-0.00699733	0.0138538	0.6135	-0.0341508	0.0201561	0.993027	0.966426	1.02036	0.8818
insomnia	Oligodendrocytes_control_AGTR1	Wald ratio	1	0.00373109	0.00738915	0.6136	-0.0107516	0.0182138	1.00374	0.989306	1.01838	0.8818
insomnia	Excitatory_control_SLCO5A1	Wald ratio	1	-0.00830714	0.0165262	0.6152	-0.0406985	0.0240842	0.991727	0.960119	1.02438	0.8818
insomnia	Oligodendrocytes_control_GRID2	Wald ratio	1	0.00214587	0.00429569	0.6174	-0.0062737	0.0105654	1.00215	0.993746	1.01062	0.8827
insomnia	Excitatory_control_LDB3	Wald ratio	1	0.00671762	0.0134553	0.6176	-0.0196548	0.03309	1.00674	0.980537	1.03364	0.8827
insomnia	Oligodendrocytes_control_ACER3	Wald ratio	1	0.00297837	0.00600488	0.6199	-0.00879119	0.0147479	1.00298	0.991247	1.01486	0.8851
insomnia	Oligodendrocytes_control_ERGIC3	Wald ratio	1	0.00751083	0.0153179	0.6239	-0.0225122	0.0375339	1.00754	0.977739	1.03825	0.8899
insomnia	Microglia_control_BTNL2	Wald ratio	1	0.00461204	0.00946048	0.6259	-0.0139305	0.0231546	1.00462	0.986166	1.02342	0.8912
insomnia	Microglia_control_TREML4	Wald ratio	1	-0.00276641	0.0056812	0.6263	-0.0139016	0.00836875	0.997237	0.986195	1.0084	0.8912
insomnia	Astrocytes_control_POU2F3	Wald ratio	1	0.00407612	0.00838059	0.6267	-0.0123498	0.0205021	1.00408	0.987726	1.02071	0.8912
insomnia	Oligodendrocytes_control_LINC00539	Wald ratio	1	-0.00549798	0.0113898	0.6293	-0.0278219	0.016826	0.994517	0.972562	1.01697	0.894
insomnia	Excitatory_control_LGI4	Wald ratio	1	-0.0055442	0.0125125	0.6577	-0.0300688	0.0189804	0.994471	0.970379	1.01916	0.8949
insomnia	Oligodendrocytes_control_LINS1	Wald ratio	1	0.00497528	0.0117014	0.6707	-0.0179594	0.02791	1.00499	0.982201	1.0283	0.8949
insomnia	Inhibitory_control_LDHC	Wald ratio	1	-0.00305649	0.0070384	0.6641	-0.0168517	0.0107388	0.996948	0.983289	1.0108	0.8949
insomnia	Excitatory_control_FAM118A	Wald ratio	1	-0.00236336	0.00533714	0.6579	-0.0128241	0.00809743	0.997639	0.987258	1.00813	0.8949
insomnia	OPCs_control_GPNMB	Wald ratio	1	-0.00292105	0.00669675	0.6627	-0.0160467	0.0102046	0.997083	0.984081	1.01026	0.8949
insomnia	Oligodendrocytes_control_RAMP1	Wald ratio	1	-0.00591159	0.0125496	0.6376	-0.0305089	0.0186857	0.994106	0.969952	1.01886	0.8949
insomnia	Excitatory_control_MCOLN2	Wald ratio	1	-0.00358104	0.00799703	0.6543	-0.0192552	0.0120931	0.996425	0.980929	1.01217	0.8949
insomnia	Oligodendrocytes_control_DPYSL5	Wald ratio	1	-0.00505976	0.0112366	0.6525	-0.0270835	0.016964	0.994953	0.97328	1.01711	0.8949
insomnia	Excitatory_control_MTERF3	Wald ratio	1	0.00891208	0.0207792	0.668	-0.0318151	0.0496393	1.00895	0.968686	1.05089	0.8949
insomnia	Oligodendrocytes_control_UTP4	Wald ratio	1	0.0119605	0.0270525	0.6584	-0.0410624	0.0649834	1.01203	0.959769	1.06714	0.8949
insomnia	Inhibitory_control_HDDC2	Wald ratio	1	0.00979916	0.0223383	0.6609	-0.0339839	0.0535822	1.00985	0.966587	1.05504	0.8949
insomnia	Excitatory_control_AKR1C2	Wald ratio	1	-0.00434038	0.0100876	0.667	-0.0241121	0.0154313	0.995669	0.976176	1.01555	0.8949
insomnia	Excitatory_control_FOXN2	Wald ratio	1	0.00720664	0.0163563	0.6595	-0.0248517	0.039265	1.00723	0.975455	1.04005	0.8949
insomnia	Astrocytes_control_DPYSL5	Wald ratio	1	0.00517529	0.0110555	0.6397	-0.0164935	0.0268441	1.00519	0.983642	1.02721	0.8949
insomnia	OPCs_control_LINS1	Wald ratio	1	0.00753703	0.0177264	0.6707	-0.0272066	0.0422807	1.00757	0.97316	1.04319	0.8949
insomnia	Inhibitory_control_SLC7A9	Wald ratio	1	-0.00647777	0.0150168	0.6662	-0.0359106	0.0229551	0.993543	0.964727	1.02322	0.8949
insomnia	Excitatory_control_CRYZ	Wald ratio	1	0.00545371	0.012839	0.671	-0.0197108	0.0306182	1.00547	0.980482	1.03109	0.8949
insomnia	Inhibitory_control_LINC00648	Wald ratio	1	-0.00329113	0.00761494	0.6656	-0.0182164	0.0116341	0.996714	0.981949	1.0117	0.8949
insomnia	Excitatory_control_TNS2	Wald ratio	1	0.00901603	0.0189036	0.6334	-0.0280351	0.0460672	1.00906	0.972354	1.04714	0.8949
insomnia	Astrocytes_control_FAM118A	Wald ratio	1	-0.00392756	0.00918093	0.6688	-0.0219222	0.0140671	0.99608	0.978316	1.01417	0.8949
insomnia	Astrocytes_control_NAPRT	Wald ratio	1	0.0051378	0.0118877	0.6656	-0.0181621	0.0284377	1.00515	0.982002	1.02885	0.8949
insomnia	Oligodendrocytes_control_DNAH6	Wald ratio	1	0.00318598	0.00687982	0.6433	-0.0102985	0.0166704	1.00319	0.989754	1.01681	0.8949
insomnia	Microglia_control_RNF150	Wald ratio	1	0.00275482	0.00613865	0.6536	-0.00927693	0.0147866	1.00276	0.990766	1.0149	0.8949
insomnia	OPCs_control_FAM118A	Wald ratio	1	-0.00394077	0.00889936	0.6579	-0.0213835	0.013502	0.996067	0.978843	1.01359	0.8949
insomnia	OPCs_control_OR2L13	Wald ratio	1	0.00435696	0.00966691	0.6522	-0.0145902	0.0233041	1.00437	0.985516	1.02358	0.8949
insomnia	OPCs_control_FBN2	Wald ratio	1	0.00391264	0.00820109	0.6333	-0.0121615	0.0199868	1.00392	0.987912	1.02019	0.8949
insomnia	Inhibitory_control_CCDC163	Wald ratio	1	-0.00272881	0.00599355	0.6489	-0.0144762	0.00901856	0.997275	0.985628	1.00906	0.8949
insomnia	Endothelial_control_AADAC	Wald ratio	1	0.00391651	0.0084497	0.643	-0.0126449	0.0204779	1.00392	0.987435	1.02069	0.8949
insomnia	Inhibitory_control_GAS8	Wald ratio	1	0.00375128	0.00830517	0.6515	-0.0125269	0.0200294	1.00376	0.987551	1.02023	0.8949
insomnia	Excitatory_control_ZNF880	Wald ratio	1	0.00565405	0.0128084	0.6589	-0.0194505	0.0307586	1.00567	0.980737	1.03124	0.8949
insomnia	Astrocytes_control_LINS1	Wald ratio	1	0.00484828	0.0114027	0.6707	-0.017501	0.0271975	1.00486	0.982651	1.02757	0.8949
insomnia	Excitatory_control_WDR88	Wald ratio	1	-0.00783529	0.0181696	0.6663	-0.0434476	0.0277771	0.992195	0.957483	1.02817	0.8949
insomnia	Oligodendrocytes_control_CAMK2N1	Wald ratio	1	-0.00350767	0.00817317	0.6678	-0.0195271	0.0125117	0.996498	0.980662	1.01259	0.8949
insomnia	Astrocytes_control_APOLD1	Wald ratio	1	0.00408202	0.00876192	0.6413	-0.0130913	0.0212554	1.00409	0.986994	1.02148	0.8949
insomnia	Excitatory_control_LINC01941	Wald ratio	1	0.00338837	0.00713791	0.635	-0.0106019	0.0173787	1.00339	0.989454	1.01753	0.8949
insomnia	Oligodendrocytes_control_RGPD8	Wald ratio	1	-0.00488172	0.0106248	0.6459	-0.0257063	0.0159428	0.99513	0.974621	1.01607	0.8949
insomnia	Excitatory_control_RBM11	Wald ratio	1	0.0120754	0.0252585	0.6326	-0.0374314	0.0615821	1.01215	0.963261	1.06352	0.8949
insomnia	Excitatory_control_SMUG1	Wald ratio	1	-0.0065034	0.0139218	0.6404	-0.0337901	0.0207832	0.993518	0.966774	1.021	0.8949
insomnia	Excitatory_control_TRPV3	Wald ratio	1	0.00733164	0.0159763	0.6463	-0.0239819	0.0386451	1.00736	0.976303	1.0394	0.8949
insomnia	Excitatory_control_RAB17	Wald ratio	1	0.00705946	0.0156534	0.652	-0.0236212	0.0377401	1.00708	0.976656	1.03846	0.8949
insomnia	Excitatory_control_CCDC171	Wald ratio	1	-0.00501599	0.0109802	0.6478	-0.0265372	0.0165052	0.994997	0.973812	1.01664	0.8949
insomnia	Excitatory_control_LINC00648	Wald ratio	1	-0.00374479	0.00867563	0.666	-0.020749	0.0132595	0.996262	0.979465	1.01335	0.8949
insomnia	Oligodendrocytes_control_AATF	Wald ratio	1	0.00856571	0.0183365	0.6404	-0.0273739	0.0445053	1.0086	0.972997	1.04551	0.8949
insomnia	Excitatory_control_KIF25	Wald ratio	1	-0.00351461	0.0076101	0.6442	-0.0184304	0.0114012	0.996492	0.981738	1.01147	0.8949
insomnia	Microglia_control_FBN2	Wald ratio	1	0.00232378	0.00487076	0.6333	-0.00722291	0.0118705	1.00233	0.992803	1.01194	0.8949
insomnia	Oligodendrocytes_control_FRG1-DT	Wald ratio	1	0.00748656	0.0162842	0.6457	-0.0244304	0.0394036	1.00751	0.975866	1.04019	0.8949
insomnia	Excitatory_control_LINS1	Wald ratio	1	0.00634589	0.0149249	0.6707	-0.022907	0.0355987	1.00637	0.977353	1.03624	0.8949
insomnia	Oligodendrocytes_control_FRRS1L	Wald ratio	1	-0.00491585	0.0112986	0.6635	-0.0270611	0.0172294	0.995096	0.973302	1.01738	0.8949
insomnia	Excitatory_control_FREM1	Wald ratio	1	-0.00468197	0.0107406	0.6629	-0.0257336	0.0163696	0.995329	0.974595	1.0165	0.8949
insomnia	Excitatory_control_CCDC163	Wald ratio	1	-0.00267677	0.00587926	0.6489	-0.0142001	0.00884657	0.997327	0.9859	1.00889	0.8949
insomnia	Microglia_control_SAXO2	Wald ratio	1	0.00312017	0.00700466	0.656	-0.010609	0.0168493	1.00313	0.989447	1.01699	0.8949
insomnia	Microglia_control_ETS2	Wald ratio	1	0.00401505	0.00836403	0.6312	-0.0123784	0.0204085	1.00402	0.987698	1.02062	0.8949
insomnia	Excitatory_control_LINC00839	Wald ratio	1	0.00526978	0.0114833	0.6463	-0.0172375	0.027777	1.00528	0.98291	1.02817	0.8949
insomnia	Excitatory_control_ITIH2	Wald ratio	1	-0.00700465	0.0151533	0.6439	-0.0367051	0.0226958	0.99302	0.96396	1.02296	0.8949
insomnia	Excitatory_control_HELB	Wald ratio	1	0.00562546	0.0127837	0.6599	-0.0194305	0.0306814	1.00564	0.980757	1.03116	0.8949
insomnia	Excitatory_control_MUC5B	Wald ratio	1	-0.00417153	0.00904618	0.6447	-0.021902	0.013559	0.995837	0.978336	1.01365	0.8949
insomnia	Astrocytes_control_LDHC	Wald ratio	1	-0.00270796	0.0062358	0.6641	-0.0149301	0.00951422	0.997296	0.985181	1.00956	0.8949
insomnia	OPCs_control_ADAMTS7	Wald ratio	1	-0.00500899	0.0117617	0.6702	-0.0280619	0.0180439	0.995004	0.972328	1.01821	0.8949
insomnia	Microglia_control_RHD	Wald ratio	1	-0.00353006	0.00811862	0.6637	-0.0194425	0.0123824	0.996476	0.980745	1.01246	0.8949
insomnia	Oligodendrocytes_control_RHD	Wald ratio	1	-0.00243224	0.00559379	0.6637	-0.0133961	0.00853159	0.997571	0.986693	1.00857	0.8949
insomnia	Excitatory_control_CENPJ	Wald ratio	1	0.0045602	0.0103564	0.6597	-0.0157383	0.0248587	1.00457	0.984385	1.02517	0.8949
insomnia	Excitatory_control_OR2L13	Wald ratio	1	0.00460777	0.0102234	0.6522	-0.0154301	0.0246456	1.00462	0.984688	1.02495	0.8949
insomnia	OPCs_control_DAPL1	Wald ratio	1	0.00388899	0.00857055	0.65	-0.0129093	0.0206873	1.0039	0.987174	1.0209	0.8949
insomnia	Inhibitory_control_LINS1	Wald ratio	1	0.00638631	0.01502	0.6707	-0.0230529	0.0358255	1.00641	0.977211	1.03647	0.8949
insomnia	Excitatory_control_MARK3	Wald ratio	1	0.00596045	0.0126797	0.6383	-0.0188918	0.0308127	1.00598	0.981286	1.03129	0.8949
insomnia	Inhibitory_control_CRYBG1	Wald ratio	1	0.00626687	0.0148492	0.673	-0.0228376	0.0353713	1.00629	0.977421	1.036	0.8967
insomnia	Excitatory_control_TLCD2	Wald ratio	1	0.00462378	0.0117282	0.6934	-0.0183635	0.027611	1.00463	0.981804	1.028	0.8992
insomnia	Oligodendrocytes_control_OR2L13	Wald ratio	1	0.002742	0.00726872	0.706	-0.0115047	0.0169887	1.00275	0.988561	1.01713	0.8992
insomnia	Oligodendrocytes_control_CSRNP3	Wald ratio	1	-0.00400166	0.0101852	0.6944	-0.0239646	0.0159613	0.996006	0.97632	1.01609	0.8992
insomnia	Excitatory_control_CLNS1A	Wald ratio	1	-0.00433916	0.010444	0.6778	-0.0248095	0.0161312	0.99567	0.975496	1.01626	0.8992
insomnia	Excitatory_control_ALG6	Wald ratio	1	0.0058565	0.0142507	0.6811	-0.0220748	0.0337878	1.00587	0.978167	1.03437	0.8992
insomnia	Excitatory_control_OR2L3	Wald ratio	1	0.00280928	0.00744707	0.706	-0.011787	0.0174055	1.00281	0.988282	1.01756	0.8992
insomnia	Excitatory_control_BTBD16	Wald ratio	1	-0.00303941	0.00769357	0.6928	-0.0181188	0.01204	0.996965	0.982044	1.01211	0.8992
insomnia	Oligodendrocytes_control_OR2L2	Wald ratio	1	0.00245451	0.00650659	0.706	-0.0102984	0.0152074	1.00246	0.989754	1.01532	0.8992
insomnia	Microglia_control_SLCO4C1	Wald ratio	1	0.00330974	0.00834064	0.6915	-0.0130379	0.0196574	1.00332	0.987047	1.01985	0.8992
insomnia	Inhibitory_control_OR2L3	Wald ratio	1	0.00339788	0.00900736	0.706	-0.0142565	0.0210523	1.0034	0.985845	1.02128	0.8992
insomnia	Excitatory_control_LINC00443	Wald ratio	1	-0.0021301	0.00552618	0.6999	-0.0129614	0.00870121	0.997872	0.987122	1.00874	0.8992
insomnia	Excitatory_control_LINC00551	Wald ratio	1	-0.00214019	0.00555236	0.6999	-0.0130228	0.00874244	0.997862	0.987062	1.00878	0.8992
insomnia	Excitatory_control_TBC1D26	Wald ratio	1	0.00563021	0.0139309	0.6861	-0.0216743	0.0329347	1.00565	0.978559	1.03348	0.8992
insomnia	Oligodendrocytes_control_SLC16A14	Wald ratio	1	-0.00426688	0.011136	0.7016	-0.0260934	0.0175596	0.995742	0.974244	1.01771	0.8992
insomnia	Inhibitory_control_TRPV2	Wald ratio	1	-0.00333873	0.0087475	0.7027	-0.0204838	0.0138064	0.996667	0.979725	1.0139	0.8992
insomnia	Inhibitory_control_OR2M3	Wald ratio	1	0.00307176	0.00814285	0.706	-0.0128882	0.0190317	1.00308	0.987194	1.01921	0.8992
insomnia	Oligodendrocytes_control_OR2L5	Wald ratio	1	0.00256154	0.00679034	0.706	-0.0107475	0.0158706	1.00256	0.98931	1.016	0.8992
insomnia	Oligodendrocytes_control_MAST4	Wald ratio	1	0.0043634	0.0108	0.6862	-0.0168047	0.0255314	1.00437	0.983336	1.02586	0.8992
insomnia	Inhibitory_control_PLEC	Wald ratio	1	0.00780925	0.0194402	0.6879	-0.0302935	0.045912	1.00784	0.970161	1.04698	0.8992
insomnia	Excitatory_control_OR2L5	Wald ratio	1	0.00306264	0.00811869	0.706	-0.01285	0.0189753	1.00307	0.987232	1.01916	0.8992
insomnia	Inhibitory_control_ANKRD36	Wald ratio	1	-0.0033899	0.00853975	0.6914	-0.0201278	0.013348	0.996616	0.980073	1.01344	0.8992
insomnia	Inhibitory_control_ITGB3BP	Wald ratio	1	-0.00325542	0.0080712	0.6867	-0.019075	0.0125641	0.99675	0.981106	1.01264	0.8992
insomnia	OPCs_control_OR2L3	Wald ratio	1	0.00295786	0.00784094	0.706	-0.0124104	0.0183261	1.00296	0.987666	1.0185	0.8992
insomnia	Oligodendrocytes_control_HFM1	Wald ratio	1	0.00225526	0.00550054	0.6818	-0.00852579	0.0130363	1.00226	0.99151	1.01312	0.8992
insomnia	Astrocytes_control_DPY19L2	Wald ratio	1	0.00542403	0.0142867	0.7042	-0.0225778	0.0334259	1.00544	0.977675	1.03399	0.8992
insomnia	Oligodendrocytes_control_OR2L3	Wald ratio	1	0.00264354	0.00700771	0.706	-0.0110916	0.0163786	1.00265	0.98897	1.01651	0.8992
insomnia	Excitatory_control_OR2M3	Wald ratio	1	0.00304254	0.00806541	0.706	-0.0127657	0.0188507	1.00305	0.987315	1.01903	0.8992
insomnia	Inhibitory_control_DYNC1I2	Wald ratio	1	-0.00468806	0.011706	0.6888	-0.0276318	0.0182557	0.995323	0.972746	1.01842	0.8992
insomnia	Inhibitory_control_OR2L2	Wald ratio	1	0.00390003	0.0103385	0.706	-0.0163634	0.0241635	1.00391	0.98377	1.02446	0.8992
insomnia	Excitatory_control_LEKR1	Wald ratio	1	0.00539189	0.0136343	0.6925	-0.0213314	0.0321151	1.00541	0.978895	1.03264	0.8992
insomnia	Inhibitory_control_EFCAB7	Wald ratio	1	-0.00513562	0.0127328	0.6867	-0.0300919	0.0198207	0.994878	0.970356	1.02002	0.8992
insomnia	Excitatory_control_PHLDB3	Wald ratio	1	0.00489293	0.0122093	0.6886	-0.0190372	0.0288231	1.0049	0.981143	1.02924	0.8992
insomnia	Inhibitory_control_LINC00443	Wald ratio	1	-0.00289223	0.00750341	0.6999	-0.0175989	0.0118145	0.997112	0.982555	1.01188	0.8992
insomnia	Inhibitory_control_OR2L5	Wald ratio	1	0.00337491	0.00894646	0.706	-0.0141602	0.02091	1.00338	0.98594	1.02113	0.8992
insomnia	Excitatory_control_OR2L2	Wald ratio	1	0.00289589	0.00767664	0.706	-0.0121503	0.0179421	1.0029	0.987923	1.0181	0.8992
insomnia	Oligodendrocytes_control_ANKRD36	Wald ratio	1	-0.00269887	0.00679891	0.6914	-0.0160247	0.010627	0.997305	0.984103	1.01068	0.8992
insomnia	Excitatory_control_CFAP299	Wald ratio	1	-0.00525133	0.0128463	0.6827	-0.0304301	0.0199274	0.994762	0.970028	1.02013	0.8992
insomnia	Astrocytes_control_TRMT9B	Wald ratio	1	-0.00487012	0.0125076	0.697	-0.029385	0.0196447	0.995142	0.971043	1.01984	0.8992
insomnia	Oligodendrocytes_control_DACH1	Wald ratio	1	0.00213434	0.00550057	0.698	-0.00864678	0.0129155	1.00214	0.99139	1.013	0.8992
insomnia	Excitatory_control_CYP4F2	Wald ratio	1	0.00386465	0.00995641	0.6979	-0.0156499	0.0233792	1.00387	0.984472	1.02365	0.8992
insomnia	Excitatory_control_OR2M4	Wald ratio	1	0.00293881	0.00779044	0.706	-0.0123304	0.0182081	1.00294	0.987745	1.01837	0.8992
insomnia	Excitatory_control_ZNF732	Wald ratio	1	0.00258338	0.00653925	0.6928	-0.0102336	0.0154003	1.00259	0.989819	1.01552	0.8992
insomnia	OPCs_control_CACNA1E	Wald ratio	1	-0.00445964	0.0113508	0.6944	-0.0267073	0.017788	0.99555	0.973646	1.01795	0.8992
insomnia	Excitatory_control_ZNF429	Wald ratio	1	0.0071839	0.0183606	0.6956	-0.0288029	0.0431707	1.00721	0.971608	1.04412	0.8992
insomnia	Inhibitory_control_LINC00551	Wald ratio	1	-0.00263714	0.00684161	0.6999	-0.0160467	0.0107724	0.997366	0.984081	1.01083	0.8992
insomnia	Excitatory_control_ANKRD36	Wald ratio	1	-0.00402086	0.0101292	0.6914	-0.0238741	0.0158324	0.995987	0.976409	1.01596	0.8992
insomnia	Excitatory_control_OR2AK2	Wald ratio	1	0.0032392	0.00858671	0.706	-0.0135908	0.0200692	1.00324	0.986501	1.02027	0.8992
insomnia	Microglia_control_FAM118A	Wald ratio	1	-0.00350736	0.00913764	0.7011	-0.0214171	0.0144024	0.996499	0.978811	1.01451	0.8992
insomnia	Excitatory_control_OR2M2	Wald ratio	1	0.00334421	0.0088651	0.706	-0.0140314	0.0207198	1.00335	0.986067	1.02094	0.8992
insomnia	Oligodendrocytes_control_CDH23	Wald ratio	1	0.00364485	0.00968622	0.7067	-0.0153402	0.0226298	1.00365	0.984777	1.02289	0.8993
insomnia	Oligodendrocytes_control_CHPT1	Wald ratio	1	-0.00298308	0.00797316	0.7083	-0.0186105	0.0126443	0.997021	0.981562	1.01272	0.9
insomnia	Excitatory_control_LINC00665	Wald ratio	1	0.00599526	0.0160645	0.709	-0.0254912	0.0374817	1.00601	0.974831	1.03819	0.9
insomnia	Inhibitory_control_WASIR2	Wald ratio	1	-0.00359298	0.00963446	0.7092	-0.0224765	0.0152905	0.996413	0.977774	1.01541	0.9
insomnia	Microglia_control_OR3A2	Wald ratio	1	0.00256627	0.00694891	0.7119	-0.0110536	0.0161861	1.00257	0.989007	1.01632	0.9007
insomnia	Inhibitory_control_ANKDD1A	Wald ratio	1	-0.00505806	0.013721	0.7124	-0.0319513	0.0218352	0.994955	0.968554	1.02208	0.9007
insomnia	Microglia_control_BARX2	Wald ratio	1	-0.00365284	0.00998537	0.7145	-0.0232242	0.0159185	0.996354	0.977043	1.01605	0.9007
insomnia	Excitatory_control_LYSMD4	Wald ratio	1	-0.00458338	0.0125429	0.7148	-0.0291674	0.0200007	0.995427	0.971254	1.0202	0.9007
insomnia	Excitatory_control_CCZ1B	Wald ratio	1	-0.0041758	0.0114275	0.7148	-0.0265737	0.0182221	0.995833	0.973776	1.01839	0.9007
insomnia	Oligodendrocytes_control_PSG1	Wald ratio	1	-0.00345175	0.00943223	0.7144	-0.0219389	0.0150354	0.996554	0.9783	1.01515	0.9007
insomnia	Excitatory_control_RAD21L1	Wald ratio	1	-0.00320967	0.00870375	0.7123	-0.020269	0.0138497	0.996795	0.979935	1.01395	0.9007
insomnia	OPCs_control_LDHC	Wald ratio	1	-0.00374776	0.0101777	0.7127	-0.0236961	0.0162006	0.996259	0.976582	1.01633	0.9007
insomnia	Endothelial_control_LINC02098	Wald ratio	1	0.00285475	0.00786708	0.7167	-0.0125647	0.0182742	1.00286	0.987514	1.01844	0.9023
insomnia	Oligodendrocytes_control_ZDHHC14	Wald ratio	1	0.00340796	0.00945086	0.7184	-0.0151157	0.0219317	1.00341	0.984998	1.02217	0.9036
insomnia	OPCs_control_DPYSL5	Wald ratio	1	0.00364595	0.0102016	0.7208	-0.0163492	0.0236411	1.00365	0.983784	1.02392	0.905
insomnia	Excitatory_control_FAM227A	Wald ratio	1	-0.00839751	0.0234705	0.7205	-0.0543996	0.0376046	0.991638	0.947054	1.03832	0.905
insomnia	Excitatory_control_PCDHB7	Wald ratio	1	0.00437907	0.0123312	0.7225	-0.0197902	0.0285483	1.00439	0.980404	1.02896	0.9054
insomnia	OPCs_control_ANKRD36	Wald ratio	1	-0.00375384	0.0106145	0.7236	-0.0245583	0.0170506	0.996253	0.975741	1.0172	0.9054
insomnia	Oligodendrocytes_control_USP6NL	Wald ratio	1	0.00315195	0.00891595	0.7237	-0.0143233	0.0206272	1.00316	0.985779	1.02084	0.9054
insomnia	Oligodendrocytes_control_LINC01099	Wald ratio	1	-0.00243689	0.00687768	0.7231	-0.0159171	0.0110434	0.997566	0.984209	1.0111	0.9054
insomnia	Excitatory_control_SLC38A8	Wald ratio	1	0.00312319	0.00895958	0.7274	-0.0144376	0.020684	1.00313	0.985666	1.0209	0.9084
insomnia	Excitatory_control_SLC9A8	Wald ratio	1	-0.00842565	0.0241433	0.7271	-0.0557464	0.0388951	0.99161	0.945779	1.03966	0.9084
insomnia	Oligodendrocytes_control_CKAP4	Wald ratio	1	-0.00202533	0.0058888	0.7309	-0.0135674	0.00951672	0.997977	0.986524	1.00956	0.912
insomnia	Endothelial_control_DSC3	Wald ratio	1	-0.00276943	0.00808044	0.7318	-0.0186071	0.0130682	0.997234	0.981565	1.01315	0.9123
insomnia	Pericytes_control_FAM118A	Wald ratio	1	-0.00309572	0.0091066	0.7339	-0.0209446	0.0147532	0.996909	0.979273	1.01486	0.9133
insomnia	Pericytes_control_DNAH11	Wald ratio	1	-0.00269301	0.00791886	0.7338	-0.018214	0.012828	0.997311	0.981951	1.01291	0.9133
insomnia	Oligodendrocytes_control_ARHGEF3	Wald ratio	1	0.00285386	0.00847454	0.7363	-0.0137562	0.019464	1.00286	0.986338	1.01965	0.9155
insomnia	Excitatory_control_SCRN3	Wald ratio	1	0.00797593	0.0238064	0.7376	-0.0386846	0.0546364	1.00801	0.962054	1.05616	0.9163
insomnia	OPCs_control_XRRA1	Wald ratio	1	-0.00238565	0.00715744	0.7389	-0.0164142	0.0116429	0.997617	0.98372	1.01171	0.9171
insomnia	Excitatory_control_FAM162B	Wald ratio	1	0.00586351	0.0177185	0.7407	-0.0288647	0.0405917	1.00588	0.971548	1.04143	0.9172
insomnia	Excitatory_control_IFT88	Wald ratio	1	-0.00616694	0.0186952	0.7415	-0.0428095	0.0304757	0.993852	0.958094	1.03094	0.9172
insomnia	Inhibitory_control_IFT88	Wald ratio	1	-0.00377499	0.0114439	0.7415	-0.0262051	0.0186551	0.996232	0.974135	1.01883	0.9172
insomnia	Oligodendrocytes_control_MET	Wald ratio	1	0.00181108	0.00546619	0.7404	-0.00890266	0.0125248	1.00181	0.991137	1.0126	0.9172
insomnia	OPCs_control_LINC02268	Wald ratio	1	-0.0015725	0.004794	0.7429	-0.0109687	0.00782373	0.998429	0.989091	1.00785	0.9173
insomnia	Excitatory_control_LINC02268	Wald ratio	1	-0.00223396	0.00681052	0.7429	-0.0155826	0.0111147	0.997769	0.984538	1.01118	0.9173
insomnia	Inhibitory_control_RPN1	Wald ratio	1	0.0035874	0.011075	0.746	-0.0181197	0.0252945	1.00359	0.982044	1.02562	0.9187
insomnia	Excitatory_control_RPN1	Wald ratio	1	0.00294666	0.00909691	0.746	-0.0148833	0.0207766	1.00295	0.985227	1.02099	0.9187
insomnia	OPCs_control_TTC23	Wald ratio	1	0.00356275	0.0109543	0.745	-0.0179076	0.0250331	1.00357	0.982252	1.02535	0.9187
insomnia	Excitatory_control_TOPAZ1	Wald ratio	1	-0.00343905	0.0107219	0.7484	-0.024454	0.0175759	0.996567	0.975843	1.01773	0.9199
insomnia	Astrocytes_control_BAIAP3	Wald ratio	1	0.00462371	0.014445	0.7489	-0.0236885	0.032936	1.00463	0.97659	1.03348	0.9199
insomnia	Excitatory_control_TRPV2	Wald ratio	1	-0.0027278	0.00850444	0.7484	-0.0193965	0.0139409	0.997276	0.98079	1.01404	0.9199
insomnia	Excitatory_control_KANK3	Wald ratio	1	0.00422312	0.0132646	0.7502	-0.0217755	0.0302217	1.00423	0.97846	1.03068	0.9207
insomnia	Excitatory_control_MIR3976HG	Wald ratio	1	-0.00445184	0.0140411	0.7512	-0.0319724	0.0230687	0.995558	0.968533	1.02334	0.9211
insomnia	Inhibitory_control_FAM162B	Wald ratio	1	-0.00456934	0.0145021	0.7527	-0.0329934	0.0238548	0.995441	0.967545	1.02414	0.9221
insomnia	OPCs_control_KLHDC4	Wald ratio	1	-0.00333033	0.0117206	0.7763	-0.0263026	0.019642	0.996675	0.97404	1.01984	0.9226
insomnia	Oligodendrocytes_control_LINC02608	Wald ratio	1	-0.00175749	0.00715622	0.806	-0.0157837	0.0122687	0.998244	0.98434	1.01234	0.9226
insomnia	Excitatory_control_VARS2	Wald ratio	1	0.00264455	0.0099546	0.7905	-0.0168665	0.0221556	1.00265	0.983275	1.0224	0.9226
insomnia	Excitatory_control_LINC02470	Wald ratio	1	-0.00128742	0.00588723	0.8269	-0.0128264	0.0102516	0.998713	0.987256	1.0103	0.9226
insomnia	Oligodendrocytes_control_KAT2B	Wald ratio	1	0.00205544	0.00866536	0.8125	-0.0149287	0.0190396	1.00206	0.985182	1.01922	0.9226
insomnia	Oligodendrocytes_control_MRPS22	Wald ratio	1	0.00176301	0.00690944	0.7986	-0.0117795	0.0153055	1.00176	0.98829	1.01542	0.9226
insomnia	Oligodendrocytes_control_EIF4E2	Wald ratio	1	-0.00691908	0.0235597	0.769	-0.053096	0.0392579	0.993105	0.948289	1.04004	0.9226
insomnia	Oligodendrocytes_control_OTUD7A	Wald ratio	1	0.00119125	0.00504127	0.8132	-0.00868964	0.0110721	1.00119	0.991348	1.01113	0.9226
insomnia	Excitatory_control_LINC00326	Wald ratio	1	-0.00153751	0.00689324	0.8235	-0.0150483	0.0119732	0.998464	0.985064	1.01205	0.9226
insomnia	Excitatory_control_RRP15	Wald ratio	1	-0.00274434	0.0124982	0.8262	-0.0272409	0.0217522	0.997259	0.973127	1.02199	0.9226
insomnia	Excitatory_control_ROR2	Wald ratio	1	0.00206004	0.00860058	0.8107	-0.0147971	0.0189172	1.00206	0.985312	1.0191	0.9226
insomnia	Endothelial_control_XRRA1	Wald ratio	1	-0.00165241	0.0059913	0.7827	-0.0133954	0.0100905	0.998349	0.986694	1.01014	0.9226
insomnia	Excitatory_control_ANAPC4	Wald ratio	1	0.00522087	0.0235701	0.8247	-0.0409765	0.0514183	1.00523	0.959852	1.05276	0.9226
insomnia	Endothelial_control_SCUBE1	Wald ratio	1	-0.00168409	0.00649787	0.7955	-0.0144199	0.0110517	0.998317	0.985684	1.01111	0.9226
insomnia	Oligodendrocytes_control_PWRN2	Wald ratio	1	0.00225413	0.00750796	0.764	-0.0124615	0.0169697	1.00226	0.987616	1.01711	0.9226
insomnia	OPCs_control_FOXN2	Wald ratio	1	0.00213121	0.00769823	0.7819	-0.0129573	0.0172197	1.00213	0.987126	1.01737	0.9226
insomnia	Inhibitory_control_HPCAL1	Wald ratio	1	-0.00539805	0.0188676	0.7748	-0.0423785	0.0315824	0.994616	0.958507	1.03209	0.9226
insomnia	Inhibitory_control_WNK1	Wald ratio	1	-0.00351892	0.0142089	0.8044	-0.0313683	0.0243304	0.996487	0.969119	1.02463	0.9226
insomnia	Oligodendrocytes_control_ESPNL	Wald ratio	1	-0.00265057	0.0110422	0.8103	-0.0242933	0.0189922	0.997353	0.975999	1.01917	0.9226
insomnia	OPCs_control_AKR1C2	Wald ratio	1	-0.00258901	0.0101107	0.7979	-0.022406	0.017228	0.997414	0.977843	1.01738	0.9226
insomnia	Excitatory_control_ZNF774	Wald ratio	1	-0.0025494	0.0115028	0.8246	-0.025095	0.0199962	0.997454	0.975217	1.0202	0.9226
insomnia	Excitatory_control_CCDC65	Wald ratio	1	0.00688938	0.0240035	0.7741	-0.0401574	0.0539362	1.00691	0.960638	1.05542	0.9226
insomnia	OPCs_control_NKAIN4	Wald ratio	1	0.00307231	0.010768	0.7754	-0.018033	0.0241776	1.00308	0.982129	1.02447	0.9226
insomnia	Oligodendrocytes_control_LRRC8A	Wald ratio	1	0.0042726	0.0157819	0.7866	-0.0266599	0.0352051	1.00428	0.973692	1.03583	0.9226
insomnia	Astrocytes_control_FAS	Wald ratio	1	-0.0025133	0.00869728	0.7726	-0.01956	0.0145334	0.99749	0.98063	1.01464	0.9226
insomnia	OPCs_control_RGPD8	Wald ratio	1	-0.00452616	0.014932	0.7618	-0.0337929	0.0247406	0.995484	0.966772	1.02505	0.9226
insomnia	Microglia_control_LDHC	Wald ratio	1	-0.00264354	0.00851091	0.7561	-0.0193249	0.0140378	0.99736	0.980861	1.01414	0.9226
insomnia	Excitatory_control_ANKFN1	Wald ratio	1	0.00408317	0.0155522	0.7929	-0.0263991	0.0345654	1.00409	0.973946	1.03517	0.9226
insomnia	Oligodendrocytes_control_APTX	Wald ratio	1	-0.00813468	0.0261786	0.756	-0.0594448	0.0431754	0.991898	0.942288	1.04412	0.9226
insomnia	Oligodendrocytes_control_ERC2	Wald ratio	1	0.00448274	0.0148984	0.7635	-0.0247181	0.0336835	1.00449	0.975585	1.03426	0.9226
insomnia	Excitatory_control_FLG	Wald ratio	1	-0.00302461	0.0124136	0.8075	-0.0273553	0.0213061	0.99698	0.973015	1.02153	0.9226
insomnia	Excitatory_control_RGPD8	Wald ratio	1	-0.00714292	0.0235648	0.7618	-0.05333	0.0390441	0.992883	0.948067	1.03982	0.9226
insomnia	Excitatory_control_DCAF13	Wald ratio	1	-0.00820712	0.0268316	0.7597	-0.0607971	0.0443829	0.991826	0.941014	1.04538	0.9226
insomnia	Oligodendrocytes_control_ZNF846	Wald ratio	1	-0.00650465	0.022591	0.7734	-0.0507831	0.0377738	0.993516	0.950485	1.0385	0.9226
insomnia	Oligodendrocytes_control_CYB5A	Wald ratio	1	-0.00452565	0.0160008	0.7773	-0.0358872	0.0268359	0.995485	0.964749	1.0272	0.9226
insomnia	Oligodendrocytes_control_ITPR2	Wald ratio	1	-0.00179829	0.00727261	0.8047	-0.0160526	0.012456	0.998203	0.984076	1.01253	0.9226
insomnia	Oligodendrocytes_control_PYROXD1	Wald ratio	1	-0.00282075	0.0128839	0.8267	-0.0280732	0.0224317	0.997183	0.972317	1.02269	0.9226
insomnia	Pericytes_control_CCDC85B	Wald ratio	1	0.00182784	0.00838317	0.8274	-0.0146032	0.0182588	1.00183	0.985503	1.01843	0.9226
insomnia	Endothelial_control_EPHB4	Wald ratio	1	-0.00154592	0.00698326	0.8248	-0.0152331	0.0121413	0.998455	0.984882	1.01222	0.9226
insomnia	Oligodendrocytes_control_GSDME	Wald ratio	1	0.00209355	0.00696093	0.7636	-0.0115499	0.015737	1.0021	0.988517	1.01586	0.9226
insomnia	Astrocytes_control_GAS8	Wald ratio	1	0.00408003	0.015261	0.7892	-0.0258316	0.0339917	1.00409	0.974499	1.03458	0.9226
insomnia	Inhibitory_control_NLRP2	Wald ratio	1	-0.00206036	0.0068327	0.763	-0.0154524	0.0113317	0.997942	0.984666	1.0114	0.9226
insomnia	OPCs_control_RPN1	Wald ratio	1	0.00273748	0.0115157	0.8121	-0.0198332	0.0253082	1.00274	0.980362	1.02563	0.9226
insomnia	Excitatory_control_NAPG	Wald ratio	1	-0.00212572	0.0085878	0.8045	-0.0189578	0.0147064	0.997877	0.981221	1.01482	0.9226
insomnia	Oligodendrocytes_control_TRIM35	Wald ratio	1	-0.00210012	0.0083621	0.8017	-0.0184898	0.0142896	0.997902	0.98168	1.01439	0.9226
insomnia	Oligodendrocytes_control_ZNF257	Wald ratio	1	-0.00163937	0.0068296	0.8103	-0.0150254	0.0117466	0.998362	0.985087	1.01182	0.9226
insomnia	Oligodendrocytes_control_CCDC149	Wald ratio	1	-0.00299052	0.0118403	0.8006	-0.0261976	0.0202165	0.997014	0.974143	1.02042	0.9226
insomnia	Excitatory_control_SKAP2	Wald ratio	1	0.00266297	0.0110582	0.8097	-0.0190112	0.0243371	1.00267	0.981168	1.02464	0.9226
insomnia	Oligodendrocytes_control_ADAMTS14	Wald ratio	1	-0.0019959	0.00835078	0.8111	-0.0183634	0.0143716	0.998006	0.981804	1.01448	0.9226
insomnia	Inhibitory_control_MED27	Wald ratio	1	-0.00364992	0.0152055	0.8103	-0.0334528	0.0261529	0.996357	0.967101	1.0265	0.9226
insomnia	Excitatory_control_TBC1D3D	Wald ratio	1	0.00214164	0.00796035	0.7879	-0.0134606	0.0177439	1.00214	0.98663	1.0179	0.9226
insomnia	Microglia_control_MMP20	Wald ratio	1	-0.00197192	0.00683928	0.7731	-0.0153769	0.0114331	0.99803	0.984741	1.0115	0.9226
insomnia	Excitatory_control_NAPRT	Wald ratio	1	-0.00304413	0.0125737	0.8087	-0.0276885	0.0216003	0.99696	0.972691	1.02184	0.9226
insomnia	Excitatory_control_MIR4422HG	Wald ratio	1	0.00310912	0.01122	0.7817	-0.0188822	0.0251004	1.00311	0.981295	1.02542	0.9226
insomnia	Oligodendrocytes_control_ACYP2	Wald ratio	1	-0.0025634	0.0099353	0.7964	-0.0220366	0.0169098	0.99744	0.978204	1.01705	0.9226
insomnia	Excitatory_control_DRAM2	Wald ratio	1	-0.00513054	0.0180148	0.7758	-0.0404395	0.0301784	0.994883	0.960367	1.03064	0.9226
insomnia	Excitatory_control_LINC02508	Wald ratio	1	0.00190942	0.00802793	0.812	-0.0138253	0.0176442	1.00191	0.98627	1.0178	0.9226
insomnia	Oligodendrocytes_control_SPATA7	Wald ratio	1	-0.00210957	0.00949083	0.8241	-0.0207116	0.0164924	0.997893	0.979501	1.01663	0.9226
insomnia	Excitatory_control_C2orf80	Wald ratio	1	-0.00358394	0.0147562	0.8081	-0.032506	0.0253381	0.996422	0.968017	1.02566	0.9226
insomnia	Excitatory_control_NPIPB12	Wald ratio	1	-0.00305511	0.0124268	0.8058	-0.0274117	0.0213015	0.99695	0.972961	1.02153	0.9226
insomnia	Excitatory_control_OTUD3	Wald ratio	1	0.00551779	0.0189656	0.7711	-0.0316549	0.0426904	1.00553	0.968841	1.04361	0.9226
insomnia	Inhibitory_control_PCM1	Wald ratio	1	0.00160125	0.00704905	0.8203	-0.0122149	0.0154174	1.0016	0.987859	1.01554	0.9226
insomnia	Oligodendrocytes_control_LINC01060	Wald ratio	1	0.00160029	0.00672826	0.812	-0.0115871	0.0147877	1.0016	0.98848	1.0149	0.9226
insomnia	Oligodendrocytes_control_TBC1D3D	Wald ratio	1	0.00247357	0.00919411	0.7879	-0.0155469	0.020494	1.00248	0.984573	1.02071	0.9226
insomnia	Excitatory_control_DBF4B	Wald ratio	1	0.00571248	0.0228514	0.8026	-0.0390763	0.0505012	1.00573	0.961677	1.0518	0.9226
insomnia	Microglia_control_XRRA1	Wald ratio	1	-0.00211381	0.00843398	0.8021	-0.0186444	0.0144168	0.997888	0.981528	1.01452	0.9226
insomnia	Endothelial_control_BACE2	Wald ratio	1	-0.00246011	0.00869789	0.7773	-0.019508	0.0145878	0.997543	0.980681	1.01469	0.9226
insomnia	Excitatory_control_SLC7A9	Wald ratio	1	-0.0029255	0.01011	0.7723	-0.0227411	0.0168901	0.997079	0.977516	1.01703	0.9226
insomnia	Astrocytes_control_TBC1D3D	Wald ratio	1	0.00254723	0.00946791	0.7879	-0.0160099	0.0211043	1.00255	0.984118	1.02133	0.9226
insomnia	Excitatory_control_CLEC19A	Wald ratio	1	0.00290531	0.011924	0.8075	-0.0204657	0.0262763	1.00291	0.979742	1.02662	0.9226
insomnia	Excitatory_control_LINC01649	Wald ratio	1	-0.00355777	0.0135711	0.7932	-0.0301572	0.0230416	0.996449	0.970293	1.02331	0.9226
insomnia	Inhibitory_control_RGPD8	Wald ratio	1	-0.00753892	0.0248713	0.7618	-0.0562866	0.0412087	0.992489	0.945268	1.04207	0.9226
insomnia	Astrocytes_control_SPATA20	Wald ratio	1	-0.00596338	0.0204604	0.7707	-0.0460658	0.034139	0.994054	0.954979	1.03473	0.9226
insomnia	Oligodendrocytes_control_OXR1	Wald ratio	1	0.00205468	0.00782594	0.7929	-0.0132842	0.0173935	1.00206	0.986804	1.01755	0.9226
insomnia	Excitatory_control_XRRA1	Wald ratio	1	-0.00105701	0.00484782	0.8274	-0.0105587	0.00844473	0.998944	0.989497	1.00848	0.9226
insomnia	OPCs_control_APOLD1	Wald ratio	1	0.00307148	0.0123378	0.8034	-0.0211106	0.0272535	1.00308	0.979111	1.02763	0.9226
insomnia	Excitatory_control_SCAPER	Wald ratio	1	0.00298073	0.0121755	0.8066	-0.0208832	0.0268446	1.00299	0.979333	1.02721	0.9226
insomnia	Excitatory_control_ANKRD65	Wald ratio	1	0.00398299	0.0163904	0.808	-0.0281423	0.0361082	1.00399	0.97225	1.03677	0.9226
insomnia	Inhibitory_control_AKR1C2	Wald ratio	1	-0.00416515	0.0133027	0.7542	-0.0302384	0.0219081	0.995844	0.970214	1.02215	0.9226
insomnia	Inhibitory_control_LY6G5C	Wald ratio	1	-0.00226138	0.0094209	0.8103	-0.0207263	0.0162036	0.997741	0.979487	1.01634	0.9226
insomnia	Excitatory_control_MGMT	Wald ratio	1	0.00348943	0.0145135	0.81	-0.0249571	0.0319359	1.0035	0.975352	1.03245	0.9226
insomnia	Endothelial_control_GALNT17	Wald ratio	1	-0.00112844	0.00483077	0.8153	-0.0105967	0.00833987	0.998872	0.989459	1.00837	0.9226
insomnia	Microglia_control_ART5	Wald ratio	1	-0.00171929	0.00778897	0.8253	-0.0169857	0.0135471	0.998282	0.983158	1.01364	0.9226
insomnia	Excitatory_control_FABP1	Wald ratio	1	-0.00207727	0.00751047	0.7821	-0.0167978	0.0126433	0.997925	0.983342	1.01272	0.9226
insomnia	Endothelial_control_LINC01060	Wald ratio	1	0.00216137	0.00694092	0.7555	-0.0114428	0.0157656	1.00216	0.988622	1.01589	0.9226
insomnia	Inhibitory_control_KANK3	Wald ratio	1	0.00303739	0.0102601	0.7672	-0.0170724	0.0231472	1.00304	0.983073	1.02342	0.9226
insomnia	OPCs_control_FRG1-DT	Wald ratio	1	0.00364498	0.012439	0.7695	-0.0207354	0.0280254	1.00365	0.979478	1.02842	0.9226
insomnia	Inhibitory_control_SMC2	Wald ratio	1	0.00580507	0.0204959	0.777	-0.0343669	0.045977	1.00582	0.966217	1.04705	0.9226
insomnia	Inhibitory_control_TBC1D3D	Wald ratio	1	0.00232525	0.0086428	0.7879	-0.0146146	0.0192651	1.00233	0.985492	1.01945	0.9226
insomnia	Oligodendrocytes_control_LINC01600	Wald ratio	1	-0.00231603	0.00932257	0.8038	-0.0205883	0.0159562	0.997687	0.979622	1.01608	0.9226
insomnia	Inhibitory_control_LINC02470	Wald ratio	1	-0.00117164	0.00535779	0.8269	-0.0116729	0.00932963	0.998829	0.988395	1.00937	0.9226
insomnia	Excitatory_control_MDH1B	Wald ratio	1	-0.00335825	0.0133031	0.8007	-0.0294323	0.0227158	0.996647	0.970997	1.02298	0.9226
insomnia	Excitatory_control_PDPN	Wald ratio	1	-0.00344211	0.0156577	0.826	-0.0341313	0.027247	0.996564	0.966445	1.02762	0.9226
insomnia	Excitatory_control_ASNSD1	Wald ratio	1	0.00902354	0.0337355	0.7891	-0.057098	0.075145	1.00906	0.944502	1.07804	0.9226
insomnia	OPCs_control_DDX11	Wald ratio	1	0.00203395	0.00842362	0.8092	-0.0144764	0.0185443	1.00204	0.985628	1.01872	0.9226
insomnia	Oligodendrocytes_control_PGM2	Wald ratio	1	-0.00355722	0.0117101	0.7613	-0.026509	0.0193945	0.996449	0.973839	1.01958	0.9226
insomnia	Inhibitory_control_XRRA1	Wald ratio	1	-0.000999861	0.00436943	0.819	-0.00956393	0.00756421	0.999001	0.990482	1.00759	0.9226
insomnia	Inhibitory_control_ZNF266	Wald ratio	1	0.00418766	0.014902	0.7787	-0.0250202	0.0333956	1.0042	0.97529	1.03396	0.9226
insomnia	Endothelial_control_IL18R1	Wald ratio	1	-0.00175594	0.00646118	0.7858	-0.0144199	0.010908	0.998246	0.985684	1.01097	0.9226
insomnia	Oligodendrocytes_control_CAPN8	Wald ratio	1	0.00138578	0.00604908	0.8188	-0.0104704	0.013242	1.00139	0.989584	1.01333	0.9226
insomnia	Astrocytes_control_SNORC	Wald ratio	1	0.00241857	0.010806	0.8229	-0.0187613	0.0235984	1.00242	0.981414	1.02388	0.9226
insomnia	Oligodendrocytes_control_AK3	Wald ratio	1	0.00296529	0.011493	0.7964	-0.0195609	0.0254915	1.00297	0.980629	1.02582	0.9226
insomnia	Pericytes_control_LINC01060	Wald ratio	1	0.00188559	0.00792776	0.812	-0.0136528	0.017424	1.00189	0.98644	1.01758	0.9226
insomnia	OPCs_control_GAS8	Wald ratio	1	0.00338763	0.0123352	0.7836	-0.0207894	0.0275646	1.00339	0.979425	1.02795	0.9226
insomnia	Oligodendrocytes_control_LINC02550	Wald ratio	1	0.00125571	0.00542342	0.8169	-0.0093742	0.0118856	1.00126	0.99067	1.01196	0.9226
insomnia	Inhibitory_control_CCND3	Wald ratio	1	-0.00590191	0.0195045	0.7622	-0.0441306	0.0323268	0.994115	0.956829	1.03286	0.9226
insomnia	Excitatory_control_CLEC2A	Wald ratio	1	-0.00153076	0.00700001	0.8269	-0.0152508	0.0121893	0.99847	0.984865	1.01226	0.9226
insomnia	Inhibitory_control_CLEC2A	Wald ratio	1	-0.00117776	0.00538578	0.8269	-0.0117339	0.00937838	0.998823	0.988335	1.00942	0.9226
insomnia	Excitatory_control_B3GNTL1	Wald ratio	1	0.00466368	0.0170544	0.7845	-0.0287629	0.0380902	1.00467	0.971647	1.03882	0.9226
insomnia	Astrocytes_control_SLC5A11	Wald ratio	1	-0.00299314	0.0103158	0.7717	-0.0232121	0.0172258	0.997011	0.977055	1.01738	0.9226
insomnia	Excitatory_control_ZNF600	Wald ratio	1	0.00493603	0.0163978	0.7634	-0.0272036	0.0370756	1.00495	0.973163	1.03777	0.9226
insomnia	Oligodendrocytes_control_MYO5A	Wald ratio	1	-0.00187647	0.00628849	0.7654	-0.0142019	0.010449	0.998125	0.985898	1.0105	0.9226
insomnia	Microglia_control_RORA	Wald ratio	1	-0.00209803	0.00878283	0.8112	-0.0193124	0.0151163	0.997904	0.980873	1.01523	0.9226
insomnia	Microglia_control_LINC02470	Wald ratio	1	-0.00158735	0.00725879	0.8269	-0.0158146	0.0126399	0.998414	0.98431	1.01272	0.9226
insomnia	Oligodendrocytes_control_POU2F3	Wald ratio	1	0.00221711	0.0102166	0.8282	-0.0178074	0.0222416	1.00222	0.98235	1.02249	0.9228
insomnia	Oligodendrocytes_control_ITGB3BP	Wald ratio	1	-0.00221933	0.0104681	0.8321	-0.0227368	0.0182981	0.997783	0.97752	1.01847	0.923
insomnia	Excitatory_control_NOB1	Wald ratio	1	0.00449855	0.0210785	0.831	-0.0368153	0.0458124	1.00451	0.963854	1.04688	0.923
insomnia	Inhibitory_control_DDX11	Wald ratio	1	0.00148895	0.00703155	0.8323	-0.0122929	0.0152708	1.00149	0.987782	1.01539	0.923
insomnia	Inhibitory_control_OPN5	Wald ratio	1	-0.00222149	0.0104028	0.8309	-0.022611	0.018168	0.997781	0.977643	1.01833	0.923
insomnia	OPCs_control_ITGB3BP	Wald ratio	1	-0.00281373	0.0132717	0.8321	-0.0288263	0.0231989	0.99719	0.971585	1.02347	0.923
insomnia	Oligodendrocytes_control_DDX11	Wald ratio	1	0.00142515	0.00670997	0.8318	-0.0117264	0.0145767	1.00143	0.988342	1.01468	0.923
insomnia	Oligodendrocytes_control_PFKL	Wald ratio	1	-0.0023583	0.0113081	0.8348	-0.0245222	0.0198056	0.997644	0.975776	1.02	0.9234
insomnia	Excitatory_control_CPSF1	Wald ratio	1	0.00346993	0.0164865	0.8333	-0.0288436	0.0357835	1.00348	0.971568	1.03643	0.9234
insomnia	Excitatory_control_EBPL	Wald ratio	1	-0.00308048	0.0149546	0.8368	-0.0323916	0.0262306	0.996924	0.968127	1.02658	0.9234
insomnia	Excitatory_control_LINC01060	Wald ratio	1	0.000821076	0.00409803	0.8412	-0.00721106	0.00885321	1.00082	0.992815	1.00889	0.9234
insomnia	Excitatory_control_FPR2	Wald ratio	1	-0.00153249	0.00750027	0.8381	-0.016233	0.013168	0.998469	0.983898	1.01326	0.9234
insomnia	Excitatory_control_ZNF552	Wald ratio	1	0.00351214	0.0175181	0.8411	-0.0308233	0.0378475	1.00352	0.969647	1.03857	0.9234
insomnia	OPCs_control_GLIPR1L2	Wald ratio	1	0.00163538	0.00799383	0.8379	-0.0140325	0.0173033	1.00164	0.986065	1.01745	0.9234
insomnia	Oligodendrocytes_control_PSORS1C1	Wald ratio	1	0.00122621	0.00608511	0.8403	-0.0107006	0.013153	1.00123	0.989356	1.01324	0.9234
insomnia	Astrocytes_control_AXDND1	Wald ratio	1	-0.00318252	0.0153546	0.8358	-0.0332775	0.0269124	0.996823	0.96727	1.02728	0.9234
insomnia	Endothelial_control_SLC4A1AP	Wald ratio	1	0.00146131	0.00723343	0.8399	-0.0127162	0.0156388	1.00146	0.987364	1.01576	0.9234
insomnia	OPCs_control_LINC01060	Wald ratio	1	0.00132714	0.00662382	0.8412	-0.0116555	0.0143098	1.00133	0.988412	1.01441	0.9234
insomnia	Excitatory_control_KLKB1	Wald ratio	1	-0.00204816	0.0100303	0.8382	-0.0217076	0.0176113	0.997954	0.978526	1.01777	0.9234
insomnia	Astrocytes_control_PSORS1C1	Wald ratio	1	0.00138335	0.00686492	0.8403	-0.0120719	0.0148386	1.00138	0.988001	1.01495	0.9234
insomnia	Oligodendrocytes_control_TMC2	Wald ratio	1	-0.00159602	0.00811597	0.8441	-0.0175033	0.0143113	0.998405	0.982649	1.01441	0.9252
insomnia	Oligodendrocytes_control_ZNF343	Wald ratio	1	-0.00212261	0.0107937	0.8441	-0.0232783	0.0190331	0.99788	0.976991	1.01922	0.9252
insomnia	Oligodendrocytes_control_SRA1	Wald ratio	1	-0.00273908	0.0141119	0.8461	-0.0303984	0.0249203	0.997265	0.970059	1.02523	0.9259
insomnia	Excitatory_control_ATP6V1C2	Wald ratio	1	-0.00205781	0.010602	0.8461	-0.0228377	0.0187221	0.997944	0.977421	1.0189	0.9259
insomnia	Inhibitory_control_ODF4	Wald ratio	1	0.00237945	0.0123403	0.8471	-0.0218075	0.0265664	1.00238	0.978429	1.02692	0.9263
insomnia	Microglia_control_STK10	Wald ratio	1	-0.00152666	0.007965	0.848	-0.0171381	0.0140847	0.998475	0.983008	1.01418	0.9266
insomnia	Oligodendrocytes_control_ZNF534	Wald ratio	1	-0.00189717	0.0100317	0.85	-0.0215592	0.0177649	0.998105	0.978672	1.01792	0.928
insomnia	Inhibitory_control_MIR4422HG	Wald ratio	1	0.00146362	0.00862825	0.8653	-0.0154478	0.018375	1.00146	0.984671	1.01854	0.9308
insomnia	Astrocytes_control_LINC01954	Wald ratio	1	-0.00118325	0.00672817	0.8604	-0.0143705	0.012004	0.998817	0.985732	1.01208	0.9308
insomnia	Astrocytes_control_MCOLN2	Wald ratio	1	-0.00132243	0.00768644	0.8634	-0.0163879	0.013743	0.998678	0.983746	1.01384	0.9308
insomnia	Excitatory_control_DDX11	Wald ratio	1	0.00125318	0.00727317	0.8632	-0.0130022	0.0155086	1.00125	0.987082	1.01563	0.9308
insomnia	Inhibitory_control_LINC02268	Wald ratio	1	-0.00130105	0.00751218	0.8625	-0.0160249	0.0134228	0.9987	0.984103	1.01351	0.9308
insomnia	Excitatory_control_HLA-B	Wald ratio	1	-0.00201792	0.0119857	0.8663	-0.0255099	0.0214741	0.997984	0.974813	1.02171	0.9308
insomnia	Oligodendrocytes_control_ABCA6	Wald ratio	1	0.00104929	0.00622772	0.8662	-0.011157	0.0132556	1.00105	0.988905	1.01334	0.9308
insomnia	Excitatory_control_CCHCR1	Wald ratio	1	-0.00309959	0.0183827	0.8661	-0.0391297	0.0329305	0.996905	0.961626	1.03348	0.9308
insomnia	Endothelial_control_UHMK1	Wald ratio	1	-0.00133679	0.00765665	0.8614	-0.0163438	0.0136702	0.998664	0.983789	1.01376	0.9308
insomnia	Astrocytes_control_DDX11	Wald ratio	1	0.00189802	0.0110157	0.8632	-0.0196927	0.0234887	1.0019	0.9805	1.02377	0.9308
insomnia	Excitatory_control_MYRFL	Wald ratio	1	0.00136178	0.00808241	0.8662	-0.0144797	0.0172033	1.00136	0.985625	1.01735	0.9308
insomnia	OPCs_control_LRMDA	Wald ratio	1	-0.00141267	0.00816262	0.8626	-0.0174114	0.0145861	0.998588	0.982739	1.01469	0.9308
insomnia	Endothelial_control_DDX11	Wald ratio	1	0.00128396	0.00745182	0.8632	-0.0133216	0.0158895	1.00128	0.986767	1.01602	0.9308
insomnia	Microglia_control_BEND6	Wald ratio	1	-0.00171166	0.00974693	0.8606	-0.0208157	0.0173923	0.99829	0.979399	1.01754	0.9308
insomnia	Pericytes_control_SOS2	Wald ratio	1	-0.00141738	0.00821398	0.863	-0.0175168	0.014682	0.998584	0.982636	1.01479	0.9308
insomnia	Inhibitory_control_ZNF429	Wald ratio	1	-0.00262127	0.0155109	0.8658	-0.0330226	0.02778	0.997382	0.967517	1.02817	0.9308
insomnia	Oligodendrocytes_control_AKIRIN1	Wald ratio	1	-0.0021538	0.0117778	0.8549	-0.0252382	0.0209306	0.997849	0.975078	1.02115	0.9308
insomnia	Inhibitory_control_LINC01060	Wald ratio	1	0.000719463	0.00411183	0.8611	-0.00733972	0.00877865	1.00072	0.992687	1.00882	0.9308
insomnia	Excitatory_control_BATF3	Wald ratio	1	0.00368512	0.0204653	0.8571	-0.0364268	0.043797	1.00369	0.964229	1.04477	0.9308
insomnia	Excitatory_control_LINC01163	Wald ratio	1	0.00180752	0.0105842	0.8644	-0.0189375	0.0225525	1.00181	0.981241	1.02281	0.9308
insomnia	Excitatory_control_GAS8	Wald ratio	1	0.00100419	0.00587141	0.8642	-0.0105038	0.0125122	1.001	0.989551	1.01259	0.9308
insomnia	Inhibitory_control_SRA1	Wald ratio	1	-0.00343067	0.0215132	0.8733	-0.0455966	0.0387352	0.996575	0.955427	1.0395	0.9321
insomnia	Inhibitory_control_CAPN8	Wald ratio	1	0.00111241	0.00674479	0.869	-0.0121074	0.0143322	1.00111	0.987966	1.01444	0.9321
insomnia	Excitatory_control_METTL21C	Wald ratio	1	-0.00219861	0.013497	0.8706	-0.0286527	0.0242555	0.997804	0.971754	1.02455	0.9321
insomnia	Pericytes_control_FAM209B	Wald ratio	1	0.00116808	0.00741335	0.8748	-0.0133621	0.0156982	1.00117	0.986727	1.01582	0.9321
insomnia	Excitatory_control_SNX19	Wald ratio	1	0.00369811	0.023135	0.873	-0.0416465	0.0490428	1.0037	0.959209	1.05027	0.9321
insomnia	Excitatory_control_NRG4	Wald ratio	1	-0.000911673	0.00563177	0.8714	-0.0119499	0.0101266	0.999089	0.988121	1.01018	0.9321
insomnia	Excitatory_control_SRA1	Wald ratio	1	-0.00281549	0.0176555	0.8733	-0.0374203	0.0317893	0.997188	0.963271	1.0323	0.9321
insomnia	Oligodendrocytes_control_LINC00665	Wald ratio	1	-0.00268269	0.0169441	0.8742	-0.0358931	0.0305277	0.997321	0.964743	1.031	0.9321
insomnia	Excitatory_control_MTHFSD	Wald ratio	1	-0.00366717	0.0226891	0.8716	-0.0481379	0.0408035	0.99634	0.953002	1.04165	0.9321
insomnia	Oligodendrocytes_control_STMN4	Wald ratio	1	-0.00100188	0.00635852	0.8748	-0.0134646	0.0114608	0.998999	0.986626	1.01153	0.9321
insomnia	Inhibitory_control_NRG4	Wald ratio	1	-0.00127272	0.00799374	0.8735	-0.0169405	0.014395	0.998728	0.983202	1.0145	0.9321
insomnia	Microglia_control_USP53	Wald ratio	1	0.00104827	0.0068008	0.8775	-0.0122813	0.0143778	1.00105	0.987794	1.01448	0.934
insomnia	Excitatory_control_WDSUB1	Wald ratio	1	0.00176668	0.0114994	0.8779	-0.0207722	0.0243056	1.00177	0.979442	1.0246	0.934
insomnia	Excitatory_control_GAL3ST2	Wald ratio	1	-0.00181012	0.0119099	0.8792	-0.0251536	0.0215334	0.998192	0.97516	1.02177	0.9347
insomnia	Excitatory_control_CCDC88B	Wald ratio	1	-0.00213308	0.0144198	0.8824	-0.0303958	0.0261297	0.997869	0.970061	1.02647	0.9374
insomnia	Astrocytes_control_SAXO2	Wald ratio	1	0.00211878	0.0144969	0.8838	-0.0262952	0.0305328	1.00212	0.974047	1.031	0.9382
insomnia	Oligodendrocytes_control_HLA-DMA	Wald ratio	1	-0.00105115	0.0074704	0.8881	-0.0156931	0.0135908	0.998949	0.984429	1.01368	0.9389
insomnia	Excitatory_control_HLA-DMA	Wald ratio	1	-0.000808328	0.00574468	0.8881	-0.0120679	0.0104513	0.999192	0.988005	1.01051	0.9389
insomnia	Excitatory_control_ZNF257	Wald ratio	1	0.00125606	0.00891866	0.888	-0.0162245	0.0187366	1.00126	0.983906	1.01891	0.9389
insomnia	Astrocytes_control_TPSD1	Wald ratio	1	-0.00103038	0.00734925	0.8885	-0.0154349	0.0133742	0.99897	0.984684	1.01346	0.9389
insomnia	Excitatory_control_DHFR2	Wald ratio	1	0.00180793	0.0125994	0.8859	-0.0228868	0.0265027	1.00181	0.977373	1.02686	0.9389
insomnia	Oligodendrocytes_control_DHFR2	Wald ratio	1	0.0018238	0.0127099	0.8859	-0.0230877	0.0267353	1.00183	0.977177	1.0271	0.9389
insomnia	Oligodendrocytes_control_PLEKHH2	Wald ratio	1	-0.00144035	0.0103859	0.8897	-0.0217967	0.018916	0.998561	0.978439	1.0191	0.9391
insomnia	Oligodendrocytes_control_SUMF1	Wald ratio	1	0.00219815	0.0170136	0.8972	-0.0311486	0.0355449	1.0022	0.969332	1.03618	0.9391
insomnia	Excitatory_control_SURF1	Wald ratio	1	0.00251681	0.0186759	0.8928	-0.034088	0.0391216	1.00252	0.966486	1.0399	0.9391
insomnia	Astrocytes_control_HLA-DMA	Wald ratio	1	-0.00127788	0.00930777	0.8908	-0.0195211	0.0169654	0.998723	0.980668	1.01711	0.9391
insomnia	Inhibitory_control_CYB5A	Wald ratio	1	-0.00253353	0.0193819	0.896	-0.0405221	0.035455	0.99747	0.960288	1.03609	0.9391
insomnia	Excitatory_control_MSH4	Wald ratio	1	-0.00267742	0.0206827	0.897	-0.0432155	0.0378607	0.997326	0.957705	1.03859	0.9391
insomnia	Excitatory_control_GPAM	Wald ratio	1	0.00314854	0.0233199	0.8926	-0.0425585	0.0488556	1.00315	0.958334	1.05007	0.9391
insomnia	Excitatory_control_MAP3K2-DT	Wald ratio	1	-0.00181371	0.0142189	0.8985	-0.0296827	0.0260552	0.998188	0.970754	1.0264	0.9391
insomnia	Oligodendrocytes_control_SFTA2	Wald ratio	1	0.00180611	0.0138037	0.8959	-0.0252492	0.0288614	1.00181	0.975067	1.02928	0.9391
insomnia	Endothelial_control_NR5A2	Wald ratio	1	0.000987075	0.0076775	0.8977	-0.0140608	0.016035	1.00099	0.986038	1.01616	0.9391
insomnia	Excitatory_control_DNALI1	Wald ratio	1	0.00166061	0.0128909	0.8975	-0.0236056	0.0269269	1.00166	0.976671	1.02729	0.9391
insomnia	Excitatory_control_VRK1	Wald ratio	1	-0.0019623	0.0143061	0.8909	-0.0300022	0.0260776	0.99804	0.970443	1.02642	0.9391
insomnia	Oligodendrocytes_control_ABCA9	Wald ratio	1	0.00106143	0.00804232	0.895	-0.0147015	0.0168244	1.00106	0.985406	1.01697	0.9391
insomnia	Astrocytes_control_EMP2	Wald ratio	1	-0.00175608	0.0134213	0.8959	-0.0280618	0.0245497	0.998245	0.972328	1.02485	0.9391
insomnia	Oligodendrocytes_control_KCNQ3	Wald ratio	1	0.0017077	0.013401	0.8986	-0.0245584	0.0279737	1.00171	0.975741	1.02837	0.9391
insomnia	Microglia_control_CFAP45	Wald ratio	1	-0.00116906	0.00936915	0.9007	-0.0195326	0.0171945	0.998832	0.980657	1.01734	0.9406
insomnia	Excitatory_control_RESP18	Wald ratio	1	-0.00247071	0.0202729	0.903	-0.0422057	0.0372642	0.997532	0.958673	1.03797	0.9423
insomnia	Oligodendrocytes_control_ASAP2	Wald ratio	1	0.000882785	0.00755658	0.907	-0.0139281	0.0156937	1.00088	0.986168	1.01582	0.9458
insomnia	Excitatory_control_PIGP	Wald ratio	1	-0.00237565	0.0210633	0.9102	-0.0436596	0.0389083	0.997627	0.95728	1.03968	0.9459
insomnia	Excitatory_control_SHTN1	Wald ratio	1	-0.00301196	0.0262644	0.9087	-0.0544902	0.0484662	0.996993	0.946968	1.04966	0.9459
insomnia	Oligodendrocytes_control_ST3GAL5	Wald ratio	1	-0.00147272	0.0130577	0.9102	-0.0270657	0.0241203	0.998528	0.973297	1.02441	0.9459
insomnia	Oligodendrocytes_control_VARS2	Wald ratio	1	-0.00115198	0.0102482	0.9105	-0.0212384	0.0189345	0.998849	0.978986	1.01911	0.9459
insomnia	Pericytes_control_EPG5	Wald ratio	1	-0.000891867	0.00770926	0.9079	-0.016002	0.0142183	0.999109	0.984125	1.01432	0.9459
insomnia	Excitatory_control_SPATA7	Wald ratio	1	0.00103083	0.00965797	0.915	-0.0178988	0.0199604	1.00103	0.98226	1.02016	0.9479
insomnia	Excitatory_control_DIS3L	Wald ratio	1	0.00181472	0.0168628	0.9143	-0.0312364	0.0348659	1.00182	0.969246	1.03548	0.9479
insomnia	Excitatory_control_CAPRIN2	Wald ratio	1	0.00153487	0.0141959	0.9139	-0.0262891	0.0293588	1.00154	0.974053	1.02979	0.9479
insomnia	Oligodendrocytes_control_NPY2R	Wald ratio	1	-0.000551387	0.0051721	0.9151	-0.0106887	0.00958592	0.999449	0.989368	1.00963	0.9479
insomnia	Oligodendrocytes_control_WDSUB1	Wald ratio	1	-0.00311706	0.030129	0.9176	-0.0621698	0.0559357	0.996888	0.939723	1.05753	0.9487
insomnia	Astrocytes_control_C3orf20	Wald ratio	1	0.000799932	0.00808647	0.9212	-0.0150495	0.0166494	1.0008	0.985063	1.01679	0.9487
insomnia	Excitatory_control_C3orf20	Wald ratio	1	0.000763931	0.00772254	0.9212	-0.0143722	0.0159001	1.00076	0.985731	1.01603	0.9487
insomnia	Excitatory_control_ZNF273	Wald ratio	1	-0.00159532	0.016086	0.921	-0.0331239	0.0299332	0.998406	0.967419	1.03039	0.9487
insomnia	Excitatory_control_LINC02652	Wald ratio	1	-0.000759824	0.00750892	0.9194	-0.0154773	0.0139577	0.99924	0.984642	1.01406	0.9487
insomnia	Excitatory_control_COL3A1	Wald ratio	1	-0.000942274	0.00901996	0.9168	-0.0186214	0.0167369	0.999058	0.981551	1.01688	0.9487
insomnia	Oligodendrocytes_control_C3orf20	Wald ratio	1	0.000842842	0.0083815	0.9199	-0.0155849	0.0172706	1.00084	0.984536	1.01742	0.9487
insomnia	Inhibitory_control_C3orf20	Wald ratio	1	0.000847298	0.00842583	0.9199	-0.0156673	0.0173619	1.00085	0.984455	1.01751	0.9487
insomnia	Excitatory_control_ZNF365	Wald ratio	1	-0.00454564	0.0467855	0.9226	-0.0962452	0.0871539	0.995465	0.908241	1.09106	0.9494
insomnia	Excitatory_control_PDGFRL	Wald ratio	1	0.00133002	0.0139975	0.9243	-0.0261051	0.0287651	1.00133	0.974233	1.02918	0.9505
insomnia	Astrocytes_control_LINC02652	Wald ratio	1	-0.000871775	0.00988157	0.9297	-0.0202397	0.0184961	0.999129	0.979964	1.01867	0.9513
insomnia	Oligodendrocytes_control_LINC01500	Wald ratio	1	0.000831633	0.00948065	0.9301	-0.0177504	0.0194137	1.00083	0.982406	1.0196	0.9513
insomnia	Excitatory_control_SIGIRR	Wald ratio	1	0.00105371	0.011978	0.9299	-0.0224232	0.0245306	1.00105	0.977826	1.02483	0.9513
insomnia	Oligodendrocytes_control_GSTM3	Wald ratio	1	0.00272351	0.0297261	0.927	-0.0555397	0.0609867	1.00273	0.945974	1.06288	0.9513
insomnia	Inhibitory_control_LINC02652	Wald ratio	1	-0.000722575	0.0081904	0.9297	-0.0167758	0.0153306	0.999278	0.983364	1.01545	0.9513
insomnia	Inhibitory_control_MX1	Wald ratio	1	-0.0016403	0.0181274	0.9279	-0.0371699	0.0338894	0.998361	0.963512	1.03447	0.9513
insomnia	Excitatory_control_NINL	Wald ratio	1	-0.00180082	0.0205294	0.9301	-0.0420384	0.0384368	0.998201	0.958833	1.03919	0.9513
insomnia	Inhibitory_control_SPATA7	Wald ratio	1	0.00135351	0.0155191	0.9305	-0.0290638	0.0317708	1.00135	0.971354	1.03228	0.9513
insomnia	Oligodendrocytes_control_COL11A1	Wald ratio	1	-0.000897581	0.0111781	0.936	-0.0228066	0.0210115	0.999103	0.977451	1.02123	0.9516
insomnia	Oligodendrocytes_control_FABP12	Wald ratio	1	0.000399509	0.004929	0.9354	-0.00926133	0.0100603	1.0004	0.990781	1.01011	0.9516
insomnia	Oligodendrocytes_control_CR1	Wald ratio	1	0.00111425	0.0138981	0.9361	-0.0261261	0.0283546	1.00111	0.974212	1.02876	0.9516
insomnia	OPCs_control_CR1	Wald ratio	1	0.000969888	0.0120975	0.9361	-0.0227412	0.024681	1.00097	0.977515	1.02499	0.9516
insomnia	Oligodendrocytes_control_TSPAN11	Wald ratio	1	0.000783369	0.00934591	0.9332	-0.0175346	0.0191013	1.00078	0.982618	1.01928	0.9516
insomnia	Astrocytes_control_SPATA22	Wald ratio	1	0.00183894	0.0223757	0.9345	-0.0420175	0.0456954	1.00184	0.958853	1.04676	0.9516
insomnia	Oligodendrocytes_control_LDHC	Wald ratio	1	-0.000560368	0.00681841	0.9345	-0.0139245	0.0128037	0.99944	0.986172	1.01289	0.9516
insomnia	Excitatory_control_GNMT	Wald ratio	1	-0.0007035	0.00850793	0.9341	-0.017379	0.015972	0.999297	0.982771	1.0161	0.9516
insomnia	Oligodendrocytes_control_CLEC2A	Wald ratio	1	-0.000422627	0.00589019	0.9428	-0.0119674	0.0111221	0.999577	0.988104	1.01118	0.9573
insomnia	Excitatory_control_SLC25A34	Wald ratio	1	0.000762254	0.0106797	0.9431	-0.0201699	0.0216944	1.00076	0.980032	1.02193	0.9573
insomnia	Inhibitory_control_OTUD3	Wald ratio	1	0.00160527	0.022853	0.944	-0.0431867	0.0463972	1.00161	0.957733	1.04749	0.9575
insomnia	Excitatory_control_LDHC	Wald ratio	1	-0.000371813	0.00562519	0.9473	-0.0113972	0.0106536	0.999628	0.988668	1.01071	0.9602
insomnia	Excitatory_control_AGA	Wald ratio	1	0.000901258	0.0139263	0.9484	-0.0263943	0.0281969	1.0009	0.973951	1.0286	0.9606
insomnia	Oligodendrocytes_control_CERS6	Wald ratio	1	-0.000360282	0.00574551	0.95	-0.0116215	0.0109009	0.99964	0.988446	1.01096	0.9616
insomnia	Excitatory_control_GLIPR1L2	Wald ratio	1	0.000360769	0.00626783	0.9541	-0.0119242	0.0126457	1.00036	0.988147	1.01273	0.9646
insomnia	Oligodendrocytes_control_FAM135B	Wald ratio	1	-0.00048179	0.00842551	0.9544	-0.0169958	0.0160322	0.999518	0.983148	1.01616	0.9646
insomnia	Astrocytes_control_ZSCAN31	Wald ratio	1	-0.000762707	0.0141127	0.9569	-0.0284236	0.0268981	0.999238	0.971977	1.02726	0.9665
insomnia	Inhibitory_control_MYRFL	Wald ratio	1	-0.000465101	0.0118531	0.9687	-0.0236972	0.022767	0.999535	0.976581	1.02303	0.9777
insomnia	Excitatory_control_NSUN2	Wald ratio	1	-0.000383447	0.0119025	0.9743	-0.0237123	0.0229454	0.999617	0.976567	1.02321	0.9819
insomnia	OPCs_control_KANK4	Wald ratio	1	-0.000329065	0.0101748	0.9742	-0.0202717	0.0196136	0.999671	0.979932	1.01981	0.9819
insomnia	Excitatory_control_SLC44A3	Wald ratio	1	0.000481792	0.0158171	0.9757	-0.0305197	0.0314833	1.00048	0.969941	1.03198	0.9826
insomnia	Excitatory_control_ZNF30	Wald ratio	1	0.000374892	0.0135947	0.978	-0.0262706	0.0270204	1.00037	0.974071	1.02739	0.9843
insomnia	Astrocytes_control_NSUN2	Wald ratio	1	-0.000193674	0.00732281	0.9789	-0.0145464	0.014159	0.999806	0.985559	1.01426	0.9845
insomnia	Astrocytes_control_SPATA7	Wald ratio	1	0.00031337	0.012887	0.9806	-0.0249452	0.025572	1.00031	0.975363	1.0259	0.9855
insomnia	Excitatory_control_ECHDC2	Wald ratio	1	-0.000377534	0.0179289	0.9832	-0.0355183	0.0347632	0.999623	0.965105	1.03537	0.9867
insomnia	Excitatory_control_APOLD1	Wald ratio	1	0.000269391	0.0123521	0.9826	-0.0239407	0.0244794	1.00027	0.976344	1.02478	0.9867
insomnia	Oligodendrocytes_control_CERS5	Wald ratio	1	0.000322133	0.0219672	0.9883	-0.0427335	0.0433778	1.00032	0.958167	1.04433	0.989
insomnia	Inhibitory_control_DNAH5	Wald ratio	1	-0.000286907	0.0193992	0.9882	-0.0383094	0.0377355	0.999713	0.962415	1.03846	0.989
insomnia	OPCs_control_NSUN2	Wald ratio	1	-0.00020257	0.0133571	0.9879	-0.0263826	0.0259774	0.999797	0.973962	1.02632	0.989
insomnia	Oligodendrocytes_control_SLC27A1	Wald ratio	1	-0.000147841	0.00951253	0.9876	-0.0187924	0.0184967	0.999852	0.981383	1.01867	0.989
insomnia	Astrocytes_control_SFTPD	Wald ratio	1	0.000232806	0.0182105	0.9898	-0.0354597	0.0359254	1.00023	0.965162	1.03658	0.9898
