# Supplementary material
Source: Research Square preprint supplement (doi:10.21203/rs.3.rs-9371633/v1)
Supplement: Supplementary file 3 [file 62658f25485f9c4847c3c060.xlsx]

## Sheet: all_iv_(5e-8)_insomnia_SNP
SNP	effect_allele.exposure	other_allele.exposure	beta.exposure	beta.outcome	eaf.outcome	chr.outcome	pos.outcome	se.outcome	pval.outcome	samplesize.outcome	outcome	pval.exposure	se.exposure	exposure	F_statistic
rs10010954	T	C	1.38814	-0.00813298	0.0659071	4	151245454	0.0111338	0.4651	386952	insomnia	8.87e-09	0.241373	Microglia_control_MAB21L2	33.0744
rs1002106	C	T	-0.235821	0.00762903	0.715207	11	44272073	0.00563918	0.1761	382812	insomnia	3e-12	0.0337955	Excitatory_control_EXT2	48.691
rs10034453	T	C	-0.858944	-0.000900405	0.254139	4	120087808	0.00584151	0.8775	385647	insomnia	2.03e-16	0.104489	Microglia_control_USP53	67.5752
rs10042299	A	G	-0.284256	0.00080032	0.535045	5	139805611	0.00501868	0.8733	386269	insomnia	1.8e-14	0.0370886	Excitatory_control_SRA1	58.7404
rs10042299	A	G	-0.233284	0.00080032	0.535045	5	139805611	0.00501868	0.8733	386269	insomnia	2.99e-08	0.0420941	Inhibitory_control_SRA1	30.7134
rs10049849	T	C	-0.468758	-0.00682323	0.447605	4	182079957	0.0051312	0.1836	382522	insomnia	1.22e-15	0.0585798	Excitatory_control_LINC00290	64.0327
rs10060053	T	C	-0.409603	-0.00994933	0.460785	5	177120697	0.00518113	0.05482	372820	insomnia	9.55e-09	0.0713785	Excitatory_control_FAM153A	32.93
rs10060053	T	C	-0.777168	-0.00994933	0.460785	5	177120697	0.00518113	0.05482	372820	insomnia	2.41e-21	0.0819325	Inhibitory_control_FAM153A	89.9741
rs10069594	C	T	-0.297072	-0.00498754	0.511959	5	61899235	0.0052423	0.3414	386062	insomnia	1.52e-09	0.0491626	Excitatory_control_DIMT1	36.5136
rs10070789	G	T	0.306354	0.00380724	0.560128	5	80700023	0.00509825	0.4552	386058	insomnia	1.55e-08	0.0541695	Excitatory_control_ACOT12	31.9844
rs10081693	T	G	-0.44876	-0.00399202	0.841525	9	94966486	0.00688958	0.5623	384483	insomnia	6.74e-09	0.0774076	Oligodendrocytes_control_ECM2	33.6094
rs10093709	A	G	-0.656346	0.001998	0.215623	8	144684215	0.00825268	0.8087	386901	insomnia	3.34e-13	0.0901578	Excitatory_control_NAPRT	52.9979
rs10142399	C	T	0.473793	-0.0009995	0.811029	14	88965284	0.00449669	0.8241	385010	insomnia	4.85e-11	0.0720531	Oligodendrocytes_control_SPATA7	43.2386
rs10149364	C	T	0.509351	-0.0009995	0.808462	14	97309348	0.00728682	0.8909	386187	insomnia	8.98e-11	0.0785639	Excitatory_control_VRK1	42.0328
rs10172499	C	T	0.820139	-0.00400802	0.257312	2	187476862	0.00589957	0.4969	386887	insomnia	1.34e-10	0.127701	Oligodendrocytes_control_ITGAV	41.2462
rs10191914	T	C	0.79785	-0.00140098	0.477014	2	102930657	0.00515505	0.7858	386418	insomnia	3.55e-18	0.0917861	Endothelial_control_IL18R1	75.5594
rs10195003	C	T	-0.492221	0.00240288	0.594408	2	113201797	0.00522974	0.6459	384855	insomnia	8.23e-15	0.0633983	Oligodendrocytes_control_RGPD8	60.2789
rs10197378	G	A	-1.18295	-0.00598207	0.77798	2	29181107	0.0063716	0.3478	381933	insomnia	4.86e-29	0.105768	Excitatory_control_TOGARAM2	125.09
rs10212419	G	A	0.908266	0.00160128	0.782671	3	139004920	0.00627561	0.7986	386988	insomnia	1.01e-15	0.113171	Oligodendrocytes_control_MRPS22	64.4103
rs10221897	A	G	-0.390905	0.00140098	0.728595	2	209040718	0.00576825	0.8081	386988	insomnia	4.9e-08	0.0716612	Excitatory_control_C2orf80	29.7559
rs1023349	C	T	-0.483192	0.00471108	0.552117	21	39471956	0.00509978	0.3556	385435	insomnia	1.19e-11	0.0712521	OPCs_control_KCNJ6	45.9879
rs10234308	C	T	-0.827416	0.00702461	0.903516	7	22528590	0.00861044	0.4146	385241	insomnia	3.98e-09	0.140599	Oligodendrocytes_control_STEAP1B	34.6326
rs10264306	A	G	-0.879868	0.00954541	0.781668	7	28239466	0.00640756	0.1363	385813	insomnia	3.47e-12	0.126471	Microglia_control_JAZF1	48.4005
rs1035271	C	T	0.581647	0.00796817	0.464726	2	144660922	0.00509727	0.118	386478	insomnia	8.53e-13	0.0813217	OPCs_control_ARHGAP15	51.1572
rs10406143	C	A	-0.487624	-0.00299551	0.501253	19	9548422	0.00565172	0.5961	377769	insomnia	5.32e-19	0.0547566	Excitatory_control_ZNF266	79.3044
rs10410530	C	T	-0.327846	0.00752827	0.830087	19	56978655	0.00704864	0.2855	374949	insomnia	2.55e-08	0.0588582	Oligodendrocytes_control_ZNF667	31.0261
rs10420900	A	G	0.357543	0.0207825	0.208755	19	20149708	0.00625128	0.0008857	385845	insomnia	5.84e-10	0.0577184	Excitatory_control_ZNF682	38.3732
rs10421925	T	C	1.34851	0.00796817	0.0655743	19	7151049	0.0105807	0.4514	378526	insomnia	2.63e-10	0.213404	Microglia_control_CCL25	39.9304
rs10438343	C	T	-0.715494	0.00150113	0.805278	15	61523580	0.00628406	0.8112	382009	insomnia	1.39e-12	0.100982	Microglia_control_RORA	50.2022
rs10444225	A	G	0.34212	-0.00697561	0.582704	11	18074457	0.00497529	0.1609	385058	insomnia	3.26e-11	0.0515675	Astrocytes_control_SAAL1	44.0153
rs1044573	A	G	-0.379533	0.00783058	0.504706	20	25206654	0.00510698	0.1252	386622	insomnia	7.24e-10	0.0616059	Oligodendrocytes_control_PYGB	37.9538
rs10447107	G	A	-0.457901	-0.001998	0.644284	5	66069819	0.00494534	0.6862	379276	insomnia	5.06e-09	0.0783363	Oligodendrocytes_control_MAST4	34.1678
rs104664	G	A	1.44108	-0.00340579	0.124937	22	45711854	0.00769124	0.6579	386302	insomnia	3.11e-30	0.126126	Excitatory_control_FAM118A	130.547
rs104664	G	A	0.864246	-0.00340579	0.124937	22	45711854	0.00769124	0.6579	386302	insomnia	1.18e-19	0.0952732	OPCs_control_FAM118A	82.2875
rs1047339	A	G	0.654023	0.00697561	0.398335	17	9815411	0.00509661	0.1711	386727	insomnia	1.73e-16	0.0793781	Excitatory_control_RCVRN	67.8866
rs10475570	T	C	0.654698	-0.0009995	0.519533	5	171578939	0.00521467	0.848	375497	insomnia	2.39e-11	0.0980074	Microglia_control_STK10	44.6235
rs10486174	A	G	-0.335573	-0.00541463	0.295141	7	7535381	0.00561166	0.3346	384206	insomnia	1.58e-10	0.0524526	Excitatory_control_COL28A1	40.9298
rs10489442	C	T	-0.415861	0.00682323	0.764729	1	24749079	0.00600817	0.2561	386988	insomnia	2.44e-11	0.0622844	OPCs_control_NIPAL3	44.5797
rs10492999	A	G	-0.622636	-0.0009995	0.931658	1	20237760	0.0142291	0.944	386866	insomnia	4.79e-09	0.106355	Inhibitory_control_OTUD3	34.2731
rs10495098	G	T	0.364205	-0.0009995	0.584054	1	218516310	0.00455192	0.8262	382100	insomnia	9.18e-16	0.0453139	Excitatory_control_RRP15	64.5993
rs10506026	G	T	0.877074	0.00722605	0.563552	12	27728944	0.00517977	0.163	377618	insomnia	9.96e-13	0.122993	Oligodendrocytes_control_PPFIBP1	50.8522
rs10514710	G	A	-0.483644	0.00722605	0.802879	3	44883971	0.00640311	0.2591	382887	insomnia	1.66e-09	0.0802265	Excitatory_control_ZNF501	36.3425
rs10514710	G	A	-0.525135	0.00722605	0.802879	3	44883971	0.00640311	0.2591	382887	insomnia	1.47e-10	0.0819394	Excitatory_control_ZNF502	41.073
rs10520157	G	T	-0.671612	0.00461061	0.856163	4	170533736	0.00732564	0.5291	384730	insomnia	3.34e-10	0.106912	Oligodendrocytes_control_NEK1	39.4626
rs10520157	G	T	-0.620478	0.00461061	0.856163	4	170533736	0.00732564	0.5291	384730	insomnia	3.34e-08	0.112355	Inhibitory_control_NEK1	30.4979
rs10520157	G	T	-0.564492	0.00461061	0.856163	4	170533736	0.00732564	0.5291	384730	insomnia	1.7e-08	0.100093	Excitatory_control_NEK1	31.8059
rs1053265	C	T	-0.509168	-0.0136933	0.227689	10	61552774	0.0061719	0.02651	385349	insomnia	4.2e-11	0.0771857	Excitatory_control_MRLN	43.516
rs1056740	C	T	-0.327506	-0.0119286	0.649443	10	104236552	0.00529903	0.02438	385635	insomnia	4.1e-15	0.0417113	Excitatory_control_MFSD13A	61.6497
rs1060112	C	T	0.872967	0.00350614	0.555175	21	44517914	0.00514886	0.4959	386752	insomnia	1.54e-24	0.0853785	Astrocytes_control_U2AF1	104.544
rs10736311	G	T	-0.528068	0.00498754	0.48946	10	124023434	0.00565864	0.3781	384663	insomnia	3.97e-09	0.0897221	Inhibitory_control_BTBD16	34.6402
rs10743750	C	T	0.590338	0.00120072	0.542013	12	31240334	0.00497279	0.8092	385705	insomnia	9.62e-16	0.0735018	OPCs_control_DDX11	64.5068
rs10749291	T	C	-0.340878	0.00511305	0.512882	10	120920588	0.005074	0.3136	381872	insomnia	3.28e-10	0.0542393	Excitatory_control_SFXN4	39.4976
rs10753232	C	T	-0.39768	-0.00399202	0.589674	1	180950126	0.00526477	0.4483	383066	insomnia	1.01e-18	0.0450143	Oligodendrocytes_control_STX6	78.0488
rs10756405	G	A	-0.593701	0.00598207	0.403312	9	12748234	0.00561841	0.287	385743	insomnia	4.93e-13	0.0821484	Oligodendrocytes_control_TYRP1	52.2322
rs10764763	A	G	0.552966	0.0009995	0.298583	10	129998231	0.0058527	0.8644	386960	insomnia	2e-09	0.0921904	Excitatory_control_LINC01163	35.9771
rs10782558	A	C	0.582847	-0.00491204	0.268721	1	76298719	0.00578714	0.396	386586	insomnia	2.1e-10	0.0917319	Oligodendrocytes_control_MSH4	40.371
rs10798295	C	T	-0.54046	0.0128826	0.618533	1	173683954	0.00528416	0.01477	385222	insomnia	2.21e-08	0.0965992	Oligodendrocytes_control_SLC9C2	31.3026
rs10800335	C	T	0.338208	-0.00598207	0.562509	1	168090767	0.00517939	0.2481	382184	insomnia	2.88e-08	0.0609526	Excitatory_control_GPR161	30.7882
rs10802965	A	G	-0.7862	-0.0129162	0.604939	1	241625692	0.00522692	0.01347	379980	insomnia	1.77e-20	0.0847622	Oligodendrocytes_control_RGS7	86.0325
rs10810317	A	G	0.470405	-0.00220242	0.494018	9	15014021	0.00505244	0.6629	386746	insomnia	6.52e-14	0.0627442	Excitatory_control_FREM1	56.2078
rs10823595	G	A	-0.701931	0.00140098	0.751003	10	72422354	0.00586167	0.8111	380362	insomnia	4.52e-09	0.119703	Oligodendrocytes_control_ADAMTS14	34.3858
rs10829172	A	G	-0.335841	-0.0126801	0.369424	10	27371126	0.00530651	0.01687	386988	insomnia	2.91e-08	0.0605464	Oligodendrocytes_control_MASTL	30.7674
rs10839663	C	T	-0.766084	0.00752827	0.656378	11	6962971	0.0053746	0.1613	385264	insomnia	3.91e-11	0.115943	Microglia_control_ZNF215	43.6577
rs10840114	T	C	-0.342809	-0.00697561	0.531874	11	8736695	0.00526855	0.1855	386988	insomnia	2.85e-13	0.0469528	Astrocytes_control_TRIM66	53.3067
rs10849582	A	G	-0.369672	0.00130085	0.58438	12	1013176	0.00525262	0.8044	386761	insomnia	6.18e-10	0.0597618	Inhibitory_control_WNK1	38.2636
rs10853009	A	G	0.358143	-0.00471108	0.35555	17	42924323	0.00530704	0.3747	386781	insomnia	2.36e-13	0.0488838	Excitatory_control_GJC1	53.6763
rs10857714	C	A	0.355356	-0.00598207	0.691434	10	135235370	0.00517939	0.2481	386988	insomnia	1.37e-08	0.0625933	Oligodendrocytes_control_SCART1	32.2308
rs10870119	A	G	0.611559	-0.00340579	0.371113	9	139653176	0.00522359	0.5144	386475	insomnia	1.3e-19	0.0674957	Excitatory_control_LCN15	82.0967
rs10879906	C	T	0.831682	0.000300045	0.600742	12	75793175	0.00521284	0.9541	386925	insomnia	6.12e-26	0.0789638	Excitatory_control_GLIPR1L2	110.932
rs10890327	C	T	-0.651262	-0.00399202	0.751069	1	45891458	0.00532323	0.4533	385811	insomnia	2.97e-16	0.0796691	Astrocytes_control_TESK2	66.8238
rs10894265	T	C	-0.216413	-0.00080032	0.460149	11	130714613	0.00500673	0.873	380615	insomnia	1.11e-08	0.0378836	Excitatory_control_SNX19	32.6335
rs10899051	G	A	-1.30103	0.00130085	0.720578	11	74642551	0.00568474	0.819	386318	insomnia	1.68e-35	0.104624	Inhibitory_control_XRRA1	154.636
rs10901130	G	A	0.547409	-0.001998	0.857637	9	135020849	0.00832366	0.8103	375680	insomnia	3.07e-09	0.0923461	Inhibitory_control_MED27	35.1388
rs10902166	C	A	0.569586	0.00060018	0.80131	11	439205	0.0068225	0.9299	384953	insomnia	1.06e-08	0.0995575	Excitatory_control_SIGIRR	32.7318
rs1090510	T	C	-0.622494	0.001998	0.479744	20	1202366	0.00541803	0.7123	380565	insomnia	2.13e-15	0.0784629	Excitatory_control_RAD21L1	62.9422
rs10910238	T	C	-0.616036	-0.0168571	0.854373	1	233792486	0.00751456	0.02488	379356	insomnia	3.04e-10	0.0978343	Oligodendrocytes_control_KCNK1	39.6487
rs10913736	C	T	-0.314059	0.0009995	0.430388	1	179335366	0.00482224	0.8358	385833	insomnia	6.93e-09	0.0542179	Astrocytes_control_AXDND1	33.5535
rs1092502	C	T	-0.430247	-0.00732678	0.307815	5	170552817	0.00555896	0.1875	381272	insomnia	3.87e-09	0.0730509	Astrocytes_control_RANBP17	34.6884
rs10929524	G	A	0.618804	-0.00498754	0.702921	2	8594806	0.00515621	0.3334	386988	insomnia	7.65e-10	0.100585	Astrocytes_control_LINC00299	37.8481
rs10933569	A	G	-0.386461	-0.00598207	0.501602	2	242710954	0.00528191	0.2574	385981	insomnia	5.88e-09	0.0664016	Oligodendrocytes_control_D2HGDH	33.873
rs10948386	T	G	-0.449924	0.0009995	0.358393	6	47829141	0.00468046	0.8309	386186	insomnia	4.12e-10	0.0719951	Inhibitory_control_OPN5	39.0545
rs10961636	G	A	0.409153	0.0205089	0.821924	9	14649728	0.00676984	0.00245	384785	insomnia	3.43e-09	0.0692364	Astrocytes_control_ZDHHC21	34.9222
rs10961636	G	A	0.538522	0.0205089	0.821924	9	14649728	0.00676984	0.00245	384785	insomnia	5.02e-10	0.0865986	Excitatory_control_ZDHHC21	38.671
rs10967984	C	T	0.346581	0.00796817	0.497789	9	27555836	0.00487991	0.1025	384693	insomnia	1.98e-11	0.0516735	Oligodendrocytes_control_C9orf72	44.9857
rs10972546	G	T	-0.422463	0.0103534	0.879115	9	35651597	0.00790523	0.1903	382260	insomnia	9.66e-10	0.0690877	Excitatory_control_ARHGEF39	37.3917
rs10998194	T	C	0.58661	0.0256255	0.91435	10	70217052	0.0092785	0.005748	386009	insomnia	1.66e-13	0.0795563	Oligodendrocytes_control_DNA2	54.3688
rs11007187	T	C	-0.789894	0.00060018	0.783256	10	28945724	0.00593125	0.9194	385308	insomnia	4.96e-19	0.0886215	Excitatory_control_LINC02652	79.4437
rs11012783	A	G	-0.653888	0.0149106	0.606594	10	18425418	0.00525707	0.004564	381817	insomnia	5.71e-11	0.0998136	OPCs_control_CACNB2	42.9168
rs11021562	A	G	-0.653303	0.0148091	0.858208	11	96108105	0.00722344	0.04035	386648	insomnia	1.59e-10	0.102129	Excitatory_control_CCDC82	40.9195
rs11021562	A	G	-0.622066	0.0148091	0.858208	11	96108105	0.00722344	0.04035	386648	insomnia	5.61e-10	0.100319	Inhibitory_control_CCDC82	38.451
rs11021568	C	T	-1.02233	0.0154183	0.858126	11	96121855	0.00725169	0.03349	386542	insomnia	5.44e-20	0.111671	Oligodendrocytes_control_CCDC82	83.8109
rs11041426	G	A	0.463501	0.00399202	0.384914	11	7543519	0.00552421	0.4699	383937	insomnia	2.18e-09	0.0774552	Oligodendrocytes_control_PPFIBP2	35.8096
rs11046118	T	C	-0.561247	0.00598207	0.345807	12	21709818	0.0056488	0.2896	386772	insomnia	4.53e-09	0.0957169	Astrocytes_control_SPX	34.382
rs11051231	C	A	0.739183	0.00110061	0.542511	12	31221072	0.0051976	0.8323	382219	insomnia	1.2e-24	0.0721231	Inhibitory_control_DDX11	105.04
rs11053496	T	G	-1.70872	0.002002	0.905152	12	10036013	0.00915498	0.8269	386690	insomnia	3.84e-12	0.246109	Inhibitory_control_LINC02470	48.2045
rs11053496	T	G	-1.30785	0.002002	0.905152	12	10036013	0.00915498	0.8269	386690	insomnia	7.21e-13	0.182267	Excitatory_control_CLEC2A	51.4872
rs11053496	T	G	-1.69984	0.002002	0.905152	12	10036013	0.00915498	0.8269	386690	insomnia	1.54e-11	0.252036	Inhibitory_control_CLEC2A	45.4876
rs11053496	T	G	-1.26123	0.002002	0.905152	12	10036013	0.00915498	0.8269	386690	insomnia	2.39e-09	0.211304	Microglia_control_LINC02470	35.6264
rs11053496	T	G	-1.55506	0.002002	0.905152	12	10036013	0.00915498	0.8269	386690	insomnia	6.2e-17	0.185983	Excitatory_control_LINC02470	69.911
rs11053709	G	A	-0.57789	0.00571631	0.908787	12	10398906	0.00933258	0.5402	386179	insomnia	2.18e-10	0.0910361	Excitatory_control_KLRD1	40.2961
rs11055023	A	G	0.371226	0.000100005	0.799922	12	12853197	0.00458541	0.9826	386793	insomnia	2.46e-11	0.0556073	Excitatory_control_APOLD1	44.5669
rs11074669	G	A	-0.425942	-0.00581689	0.37913	16	25043277	0.00522185	0.2653	386308	insomnia	6.4e-10	0.0689207	Inhibitory_control_LINC02175	38.1946
rs11078780	T	G	0.36849	0.0107577	0.599786	17	1934199	0.00520463	0.03874	383877	insomnia	2.77e-12	0.0527246	Inhibitory_control_DPH1	48.8454
rs11081265	A	G	-0.420104	0.00270365	0.532022	18	6736125	0.00513316	0.5984	383809	insomnia	1.09e-09	0.068925	Astrocytes_control_ARHGAP28	37.1501
rs11084112	G	A	-0.718182	0.00110061	0.677295	19	52222552	0.00538656	0.8381	384008	insomnia	7.04e-15	0.0922669	Excitatory_control_FPR2	60.5867
rs1109895	C	T	-0.525643	-0.00501254	0.282352	1	59012431	0.00561835	0.3723	386875	insomnia	4.57e-11	0.0798345	Astrocytes_control_DAB1	43.3511
rs11107	G	A	-0.510089	0.00521357	0.62165	22	32875190	0.00524804	0.3205	386988	insomnia	1.92e-19	0.0565663	OPCs_control_FBXO7	81.3159
rs1112186	T	C	-0.644627	0.00491204	0.713835	3	164430383	0.00580063	0.3971	376739	insomnia	5.02e-09	0.110256	OPCs_control_LINC01324	34.1834
rs11123770	A	G	-0.516954	-0.00682323	0.384343	2	99825102	0.00521567	0.1908	385938	insomnia	3.77e-11	0.0781727	Inhibitory_control_TSGA10	43.7315
rs11123861	C	T	-0.532255	0.001998	0.357304	2	98309882	0.00564964	0.7236	376692	insomnia	1.61e-10	0.0832391	OPCs_control_ANKRD36	40.887
rs11129814	T	C	-0.224101	0.00813298	0.876774	3	39015981	0.00781953	0.2983	385080	insomnia	3.53e-08	0.0406513	Excitatory_control_TTC21A	30.3907
rs11131799	G	A	-0.332918	-0.000300045	0.3592	4	178363378	0.00463632	0.9484	384148	insomnia	5.31e-09	0.0570328	Excitatory_control_AGA	34.0741
rs11132783	A	G	-0.764172	-0.00299551	0.676286	4	190890860	0.00539171	0.5785	386988	insomnia	5.73e-22	0.0793178	Excitatory_control_FRG1-DT	92.8199
rs111389829	C	T	-1.01928	-0.00399202	0.869943	3	150666876	0.00861262	0.643	383058	insomnia	1.19e-08	0.178802	Endothelial_control_AADAC	32.4971
rs111459816	C	T	-2.50182	-0.0009995	0.939813	8	83016691	0.0123315	0.9354	385674	insomnia	1.68e-10	0.39165	Oligodendrocytes_control_FABP12	40.8053
rs11150881	A	G	-0.549404	0.00310481	0.749208	17	259304	0.00588355	0.5977	386737	insomnia	2.62e-11	0.0824123	Astrocytes_control_C17orf97	44.4427
rs111529654	G	A	-0.798873	0.00692392	0.920759	6	39696712	0.00939216	0.461	386988	insomnia	5.76e-13	0.110861	Excitatory_control_KIF6	51.9272
rs111529654	G	A	-0.810994	0.00692392	0.920759	6	39696712	0.00939216	0.461	386988	insomnia	8.63e-16	0.100808	Inhibitory_control_KIF6	64.7207
rs11159021	T	C	0.525921	0.00581689	0.654345	14	73974531	0.00533422	0.2755	384487	insomnia	2.41e-08	0.0942531	Astrocytes_control_ACOT1	31.135
rs11161508	T	G	-0.755803	0.0009995	0.496824	1	85476636	0.00580944	0.8634	382539	insomnia	6.18e-16	0.0934738	Astrocytes_control_MCOLN2	65.3789
rs11170631	T	C	-0.30801	-0.00796817	0.702905	12	54041192	0.00570223	0.1623	386070	insomnia	2.81e-09	0.0518326	Astrocytes_control_ATP5MC2	35.3119
rs111758952	C	T	0.429516	-0.00895974	0.724551	9	116138460	0.00556984	0.1077	385070	insomnia	8.7e-11	0.0662017	Excitatory_control_HDHD3	42.0941
rs11178277	A	G	0.602703	-0.00895974	0.61917	12	70935636	0.0052923	0.09046	384537	insomnia	4.43e-08	0.110127	Oligodendrocytes_control_KCNMB4	29.9517
rs111827095	C	T	-1.24929	-0.00697561	0.921855	11	32517012	0.00920771	0.4487	385358	insomnia	4.08e-10	0.199856	Astrocytes_control_WT1	39.0742
rs11185866	T	C	0.300328	0.00440971	0.761054	10	91502032	0.00611321	0.4707	380000	insomnia	2.65e-09	0.0504608	Excitatory_control_KIF20B	35.4229
rs111925602	T	C	-1.39925	-0.0324672	0.946191	6	33103580	0.0126731	0.01041	386429	insomnia	4.79e-11	0.21274	Microglia_control_HLA-DMA	43.2605
rs111941366	C	T	0.821466	-0.001998	0.568254	1	25736369	0.00459511	0.6637	386988	insomnia	1.25e-14	0.106532	Oligodendrocytes_control_RHD	59.4593
rs111941366	C	T	0.565997	-0.001998	0.568254	1	25736369	0.00459511	0.6637	386988	insomnia	1.37e-08	0.0997018	Microglia_control_RHD	32.2272
rs111945534	C	T	0.321108	-0.00299551	0.585841	12	69170054	0.00585958	0.6092	380910	insomnia	4.86e-08	0.0588506	Oligodendrocytes_control_SLC35E3	29.7715
rs112149204	T	C	-0.946885	0.00250313	0.88734	11	18432941	0.00805885	0.7561	384605	insomnia	3.2e-12	0.135876	Microglia_control_LDHC	48.5632
rs11220269	A	C	-0.739418	0.00300451	0.735941	11	125772782	0.00574201	0.6008	386382	insomnia	8.67e-14	0.0991218	Oligodendrocytes_control_DDX25	55.647
rs112203451	C	A	-0.607843	0.00020002	0.705196	1	62733448	0.00618469	0.9742	382610	insomnia	3.8e-11	0.0919346	OPCs_control_KANK4	43.7144
rs11222384	T	C	-1.33486	0.00481156	0.804321	11	130778990	0.00636942	0.45	386853	insomnia	1.11e-24	0.130151	Oligodendrocytes_control_SNX19	105.19
rs11222385	G	A	-0.484085	0.00601807	0.809994	11	130779052	0.00647278	0.3525	383962	insomnia	6.27e-15	0.0620744	OPCs_control_SNX19	60.816
rs11226451	A	C	-0.884135	-0.0139029	0.81605	11	104507726	0.00664118	0.03631	386241	insomnia	9.34e-15	0.114113	OPCs_control_LINC02552	60.0297
rs11257161	C	T	-0.633894	-0.001998	0.841892	10	11581074	0.00565177	0.7237	386469	insomnia	1.29e-11	0.093632	Oligodendrocytes_control_USP6NL	45.8336
rs112641399	C	T	-0.844173	0.00853633	0.931261	22	19279558	0.0101513	0.4004	386299	insomnia	1.88e-18	0.0963181	Excitatory_control_CLTCL1	76.8153
rs112923929	C	T	0.997247	-0.00697561	0.897764	7	93001366	0.00789434	0.3769	385333	insomnia	1.16e-08	0.174794	Microglia_control_FAM133B	32.5502
rs1129464	G	A	0.544376	0.00796817	0.402279	17	9816452	0.00539244	0.1395	384429	insomnia	9.54e-10	0.0889959	Inhibitory_control_RCVRN	37.416
rs113036490	T	C	0.768678	0.00934352	0.844984	8	120874529	0.00718408	0.1934	386600	insomnia	9.3e-23	0.0782829	Excitatory_control_DSCC1	96.4174
rs113036490	T	C	0.608802	0.00934352	0.844984	8	120874529	0.00718408	0.1934	386600	insomnia	2.03e-09	0.101551	Oligodendrocytes_control_DSCC1	35.9402
rs113036490	T	C	0.701014	0.00934352	0.844984	8	120874529	0.00718408	0.1934	386600	insomnia	1.75e-15	0.0880927	Inhibitory_control_DSCC1	63.3248
rs113036490	T	C	0.656154	0.00934352	0.844984	8	120874529	0.00718408	0.1934	386600	insomnia	3.52e-10	0.104582	OPCs_control_DSCC1	39.364
rs1130592	T	G	0.606064	-0.0104545	0.350235	6	31236690	0.0058168	0.07229	375384	insomnia	1.56e-13	0.0821038	Inhibitory_control_HLA-C	54.4893
rs113070636	C	A	-1.42808	0.00150113	0.914187	6	32950897	0.0106683	0.8881	386936	insomnia	1.97e-25	0.137024	Oligodendrocytes_control_HLA-DMA	108.62
rs113070636	C	A	-1.85708	0.00150113	0.914187	6	32950897	0.0106683	0.8881	386936	insomnia	8.52e-34	0.153254	Excitatory_control_HLA-DMA	146.837
rs1132812	A	G	0.397146	-0.0108587	0.466901	16	30198151	0.00510808	0.03352	383892	insomnia	9.48e-12	0.0582826	Oligodendrocytes_control_NPIPB13	46.4326
rs1133576	C	T	0.603181	0.00551518	0.856129	4	6675421	0.00725116	0.4469	386052	insomnia	1.16e-12	0.0848313	Excitatory_control_LINC02482	50.5572
rs113593856	G	A	1.57134	0.00843548	0.947805	22	22055060	0.0123219	0.4936	372836	insomnia	3.95e-09	0.266952	Microglia_control_MAPK1	34.6477
rs1137063	G	A	1.06525	0.00883895	0.921536	8	11710974	0.0095226	0.3533	380821	insomnia	4.41e-09	0.181537	Pericytes_control_CTSB	34.4326
rs113741660	C	T	0.73246	-0.001998	0.69622	17	16309454	0.00622916	0.7484	382626	insomnia	4.18e-24	0.0723248	Excitatory_control_TRPV2	102.564
rs114586219	C	A	-1.27942	-0.00399202	0.928844	15	82537939	0.00896192	0.656	386988	insomnia	1.94e-12	0.18177	Microglia_control_SAXO2	49.5434
rs114767512	C	T	-1.3451	0.000500125	0.888116	11	18438504	0.00756645	0.9473	385606	insomnia	2.72e-36	0.106923	Excitatory_control_LDHC	158.257
rs1149177	G	A	-0.308728	-0.00531409	0.482414	1	110212916	0.00517524	0.3045	380131	insomnia	1.66e-08	0.0546975	Excitatory_control_GSTM2	31.8579
rs11541908	G	A	0.557842	-0.00598207	0.728935	9	35705759	0.00531306	0.2602	385743	insomnia	7.47e-13	0.0777972	Astrocytes_control_TPM2	51.4155
rs11552168	G	A	0.40912	-0.00995033	0.747498	7	89748888	0.00590109	0.09176	386293	insomnia	4.91e-11	0.0622355	Astrocytes_control_STEAP2	43.2142
rs11580071	G	A	-0.949461	0.00813298	0.879284	1	160951832	0.00775825	0.2945	384866	insomnia	9.26e-09	0.165303	Oligodendrocytes_control_F11R	32.9907
rs1159362	G	A	-0.646996	-0.0183677	0.299234	9	80327434	0.00563067	0.001106	386780	insomnia	2.31e-09	0.108297	Endothelial_control_GNA14	35.692
rs115991849	A	C	-1.33429	-0.0314987	0.950652	6	33062357	0.0128132	0.01396	386529	insomnia	4.08e-08	0.24315	Endothelial_control_HLA-DMA	30.1131
rs11601737	A	G	-0.491766	-0.00399202	0.662019	11	34952187	0.00528221	0.4498	383679	insomnia	1.09e-19	0.0541639	Inhibitory_control_APIP	82.4323
rs11601737	A	G	-0.743015	-0.00399202	0.662019	11	34952187	0.00528221	0.4498	383679	insomnia	2.68e-31	0.0638511	Astrocytes_control_APIP	135.412
rs11601737	A	G	-0.624405	-0.00399202	0.662019	11	34952187	0.00528221	0.4498	383679	insomnia	3.64e-25	0.0602511	OPCs_control_APIP	107.4
rs11605972	G	A	-0.918648	-0.00399202	0.662039	11	34952189	0.0054613	0.4648	383669	insomnia	2.21e-28	0.0831423	Excitatory_control_APIP	122.083
rs11605972	G	A	-0.907817	-0.00399202	0.662039	11	34952189	0.0054613	0.4648	383669	insomnia	1.5e-21	0.0952114	Oligodendrocytes_control_APIP	90.9116
rs116218019	T	G	-0.940193	-0.00995033	0.939412	1	231814592	0.0108387	0.3586	386242	insomnia	5.99e-11	0.143671	Excitatory_control_DISC1	42.8252
rs11626972	A	G	0.669194	0.0082338	0.581332	14	74033594	0.0051418	0.1093	381721	insomnia	1.69e-09	0.111061	Oligodendrocytes_control_ACOT1	36.3061
rs11632061	A	C	0.477979	-0.00672255	0.401928	15	40837598	0.00523164	0.1988	386774	insomnia	3.18e-17	0.0566342	Oligodendrocytes_control_CCDC32	71.2295
rs11638111	T	C	-0.438436	0.00924258	0.838221	15	55606213	0.0072008	0.1993	380341	insomnia	8.14e-09	0.0760451	OPCs_control_RAB27A	33.2407
rs11638111	T	C	-0.497447	0.00924258	0.838221	15	55606213	0.0072008	0.1993	380341	insomnia	2e-12	0.0707156	Inhibitory_control_RAB27A	49.4839
rs11638111	T	C	-0.714283	0.00924258	0.838221	15	55606213	0.0072008	0.1993	380341	insomnia	8.38e-16	0.088747	Oligodendrocytes_control_RAB27A	64.7788
rs11638111	T	C	-0.598049	0.00924258	0.838221	15	55606213	0.0072008	0.1993	380341	insomnia	3.05e-13	0.0820116	Excitatory_control_RAB27A	53.177
rs116518228	C	T	-1.08142	-0.00498754	0.929368	6	31448652	0.0102307	0.6259	386378	insomnia	4.4e-08	0.197551	Microglia_control_BTNL2	29.9659
rs11652657	A	G	0.284981	0.0100503	0.544761	17	439124	0.00513117	0.05015	386380	insomnia	1.59e-08	0.0504257	Excitatory_control_VPS53	31.9394
rs11657244	C	T	0.315384	0.00180162	0.858333	17	42675237	0.00720696	0.8026	382694	insomnia	5.23e-10	0.0507701	Excitatory_control_DBF4B	38.589
rs11662257	T	C	1.12068	-0.0009995	0.922138	18	44204073	0.00863964	0.9079	386306	insomnia	3.66e-08	0.203525	Pericytes_control_EPG5	30.3199
rs11670436	A	C	0.404779	0.001998	0.361245	19	53293322	0.00663746	0.7634	382628	insomnia	1.69e-10	0.0633711	Excitatory_control_ZNF600	40.7993
rs116729388	G	A	0.496632	0.00934352	0.854068	17	42832528	0.00717118	0.1926	386846	insomnia	4.2e-09	0.084517	Oligodendrocytes_control_DBF4B	34.5289
rs11675562	G	T	-1.48681	0.00140098	0.959135	2	189764237	0.013411	0.9168	385177	insomnia	3.19e-09	0.251078	Excitatory_control_COL3A1	35.0665
rs116869463	T	C	-0.545926	0.002002	0.955327	16	86589166	0.0123866	0.8716	386685	insomnia	1.05e-09	0.0894652	Excitatory_control_MTHFSD	37.2357
rs11688652	T	G	-0.500032	0.00598207	0.498093	2	173107486	0.00511504	0.2422	386988	insomnia	3e-11	0.0752303	Excitatory_control_ITGA6	44.1784
rs11691779	C	A	0.359601	0.00299551	0.343853	2	98166928	0.00499744	0.5489	384252	insomnia	1.06e-10	0.0556852	OPCs_control_ANKRD36B	41.7026
rs11691779	C	A	0.748004	0.00299551	0.343853	2	98166928	0.00499744	0.5489	384252	insomnia	3.58e-17	0.0887732	Inhibitory_control_ANKRD36B	70.9976
rs11691779	C	A	0.867211	0.00299551	0.343853	2	98166928	0.00499744	0.5489	384252	insomnia	3.75e-27	0.0803563	Excitatory_control_ANKRD36B	116.469
rs11691885	G	T	-0.253224	0.00521357	0.732461	2	10024111	0.00578536	0.3675	386772	insomnia	3.55e-08	0.0459397	Excitatory_control_TAF1B	30.3831
rs11711174	G	A	-0.844481	0.00290421	0.913471	3	44157777	0.00905445	0.7484	386212	insomnia	1.14e-12	0.118728	Excitatory_control_TOPAZ1	50.5912
rs11713152	G	T	-0.609404	-0.0148886	0.745174	3	84853779	0.00603478	0.01362	377059	insomnia	1.61e-08	0.107865	Oligodendrocytes_control_CADM2	31.9191
rs11717438	G	T	0.590258	0.000500125	0.658845	3	14713058	0.00497341	0.9199	386988	insomnia	3.19e-15	0.0748766	Inhibitory_control_C3orf20	62.143
rs11717438	G	T	0.59338	0.000500125	0.658845	3	14713058	0.00497341	0.9199	386988	insomnia	2.98e-13	0.0813362	Oligodendrocytes_control_C3orf20	53.2228
rs11731801	C	T	-0.246115	0.00873807	0.593471	4	84394536	0.00518534	0.09196	386399	insomnia	3.54e-08	0.0446481	Oligodendrocytes_control_MRPS18C	30.3858
rs11733355	A	G	0.305728	0.00461061	0.655419	4	44616657	0.00541365	0.3944	383469	insomnia	1.26e-13	0.0412595	Excitatory_control_YIPF7	54.9064
rs11733505	T	C	0.353201	0.00895974	0.406112	4	17617261	0.00511903	0.08007	386906	insomnia	2.44e-13	0.0482367	Excitatory_control_FAM184B	53.6152
rs11734332	T	G	0.776753	0.00697561	0.342193	4	13653622	0.00526017	0.1848	385118	insomnia	6.86e-10	0.125907	Oligodendrocytes_control_LINC01182	38.0597
rs11739895	C	T	0.90506	0.00299551	0.123806	5	101392473	0.00754878	0.6915	385179	insomnia	2.23e-08	0.161819	Microglia_control_SLCO4C1	31.282
rs11741099	A	G	0.454269	-0.00598207	0.651992	5	178664463	0.0051477	0.2452	385077	insomnia	3.75e-08	0.0825586	Oligodendrocytes_control_ADAMTS2	30.2762
rs11745591	C	T	-0.372054	0.00260339	0.563498	5	68594708	0.00515436	0.6135	386778	insomnia	1.15e-14	0.0481847	Excitatory_control_CCDC125	59.6204
rs11760000	G	A	0.799087	0.00631993	0.506588	6	135370496	0.00512035	0.2171	386944	insomnia	1.51e-15	0.100183	Oligodendrocytes_control_ALDH8A1	63.6211
rs11764792	C	T	-0.297544	0.00732678	0.520048	7	50496841	0.00507596	0.1489	386988	insomnia	2.19e-14	0.0389498	Excitatory_control_FIGNL1	58.3572
rs11771936	A	G	-0.336579	0.00370686	0.814	7	99943283	0.00651038	0.5691	386677	insomnia	1.61e-08	0.0595729	Oligodendrocytes_control_PILRB	31.921
rs1177282	G	A	-0.432106	0.00330546	0.590672	2	61357777	0.00523285	0.5276	385095	insomnia	4.85e-08	0.0791894	OPCs_control_C2orf74	29.7747
rs1177305	C	T	-0.493382	0.00310481	0.569278	2	61387871	0.00509917	0.5426	386526	insomnia	4.72e-17	0.0587812	Excitatory_control_C2orf74	70.4513
rs11777808	A	C	0.236872	0.0119714	0.671011	8	22462755	0.00544059	0.02778	385937	insomnia	2.29e-08	0.0423874	Excitatory_control_CCAR2	31.2288
rs11778018	T	C	0.269195	0.00210221	0.595778	8	145026450	0.00523319	0.6879	380361	insomnia	4.28e-08	0.0491338	Inhibitory_control_PLEC	30.0174
rs11807	T	C	-0.36699	-0.0009995	0.805048	1	110260742	0.0109092	0.927	386988	insomnia	3.35e-09	0.0620599	Oligodendrocytes_control_GSTM3	34.9693
rs118091186	G	A	1.88551	0.00561574	0.949741	11	76591346	0.0113222	0.6199	386988	insomnia	3.71e-12	0.271383	Oligodendrocytes_control_ACER3	48.2714
rs118143862	A	G	-1.52365	0.00300451	0.935735	11	102878081	0.0104207	0.7731	386988	insomnia	1.71e-10	0.238623	Microglia_control_MMP20	40.7703
rs118162407	C	A	-1.14748	-0.00598207	0.915487	19	46034346	0.00866379	0.4899	386988	insomnia	1.73e-09	0.190571	Endothelial_control_EXOC3L2	36.2556
rs1186675	A	G	-0.316936	-0.00631993	0.120594	1	160039084	0.00774667	0.4146	383906	insomnia	2.07e-08	0.0565343	Excitatory_control_IGSF8	31.4282
rs11902826	G	A	0.521622	0.00190181	0.630068	2	27177545	0.00532138	0.7208	383860	insomnia	5.38e-14	0.0693424	OPCs_control_DPYSL5	56.5865
rs11955140	T	C	-0.467623	-0.0314987	0.893009	5	134160040	0.00819534	0.0001213	386019	insomnia	1.83e-15	0.0588018	Excitatory_control_CAMLG	63.2427
rs1196798	A	G	0.721831	-0.0082338	0.176611	12	105513465	0.00659715	0.212	385829	insomnia	3.82e-12	0.103956	Oligodendrocytes_control_WASHC4	48.214
rs1196798	A	G	0.797651	-0.0082338	0.176611	12	105513465	0.00659715	0.212	385829	insomnia	8.35e-13	0.111476	Oligodendrocytes_control_APPL2	51.1992
rs1196884	G	A	0.604728	-0.0101514	0.179878	12	105488173	0.0065714	0.1224	386359	insomnia	2.13e-11	0.0903009	Oligodendrocytes_control_ALDH1L2	44.8473
rs11985759	T	C	-1.66612	0.0163327	0.947933	8	57774806	0.0119053	0.1701	384794	insomnia	1.67e-08	0.295252	Endothelial_control_LINC01606	31.8438
rs11985765	G	T	0.358314	0.0104545	0.630158	8	110164485	0.00526352	0.04701	386900	insomnia	2.51e-08	0.0642959	Excitatory_control_TRHR	31.0572
rs12022333	T	C	-0.672311	-0.0207825	0.945108	1	117596069	0.0117472	0.07687	386878	insomnia	4.52e-09	0.114651	Excitatory_control_TTF2	34.386
rs12030360	A	G	0.546027	-0.00974735	0.361356	1	156645583	0.00532311	0.06708	381532	insomnia	1.57e-11	0.0809947	Excitatory_control_NES	45.448
rs12030937	C	A	-0.687523	-0.00299551	0.700376	1	248113121	0.00664623	0.6522	384883	insomnia	3.06e-08	0.124147	OPCs_control_OR2L13	30.6692
rs12030937	C	A	-0.650099	-0.00299551	0.700376	1	248113121	0.00664623	0.6522	384883	insomnia	2.55e-09	0.109114	Excitatory_control_OR2L13	35.4977
rs12039927	G	A	-0.696967	0.00150113	0.873473	1	39530582	0.00820871	0.8549	386219	insomnia	7.41e-16	0.0864338	Oligodendrocytes_control_AKIRIN1	65.0216
rs12051048	C	A	-0.417441	0.00682323	0.761027	16	783864	0.00600944	0.2562	386988	insomnia	1.37e-14	0.0542167	Excitatory_control_CIAO3	59.2823
rs12057778	G	A	-0.343188	0.00722605	0.70297	1	173657051	0.00563977	0.2001	382532	insomnia	3.26e-09	0.0579923	Excitatory_control_SLC9C2	35.0205
rs12108681	T	C	-0.666519	-0.00895974	0.755135	5	81278375	0.0060006	0.1354	383555	insomnia	1.27e-11	0.0984181	Inhibitory_control_ATG10	45.8644
rs12117495	A	G	-0.542882	-0.00299551	0.929897	1	20183445	0.0102961	0.7711	386269	insomnia	4.78e-08	0.0994445	Excitatory_control_OTUD3	29.8023
rs12126676	T	C	0.312631	-0.00498754	0.605522	1	200600820	0.00510528	0.3286	384971	insomnia	4.42e-12	0.0451576	Excitatory_control_DDX59	47.9293
rs12132835	C	T	-0.916917	-0.00697561	0.736819	1	53600889	0.00572186	0.2228	380567	insomnia	5.52e-11	0.139855	Endothelial_control_SLC1A7	42.9835
rs12132879	C	T	-1.44179	-0.001998	0.936499	1	223900795	0.00872153	0.8188	386606	insomnia	2.89e-14	0.189629	Oligodendrocytes_control_CAPN8	57.8092
rs12140999	C	T	-0.379985	-0.00598207	0.565923	1	207521434	0.00519803	0.2498	385559	insomnia	3.14e-08	0.068671	Excitatory_control_CR2	30.6186
rs12141472	C	T	0.628523	-0.00598207	0.799153	1	85036784	0.00590457	0.311	385297	insomnia	7.24e-10	0.102019	Astrocytes_control_SPATA1	37.9562
rs12150618	A	G	-0.355907	-0.00697561	0.589889	17	18102578	0.00498361	0.1616	386907	insomnia	1.77e-09	0.0591421	Inhibitory_control_MYO15A	36.2143
rs12153819	C	T	0.660362	-0.0109399	0.878445	6	83773049	0.00799494	0.1712	386017	insomnia	3.98e-09	0.112213	Oligodendrocytes_control_DOP1A	34.6318
rs12173930	C	T	-0.638558	-0.00995033	0.854982	6	78186434	0.00696477	0.1531	383600	insomnia	5.21e-09	0.109339	Excitatory_control_LINC02540	34.1078
rs12203032	C	A	-0.969039	0.00340579	0.862625	6	168391859	0.00737449	0.6442	382564	insomnia	4.01e-12	0.139693	Excitatory_control_KIF25	48.1208
rs1222204	T	C	-0.276039	0.00697561	0.340479	11	30333224	0.00498837	0.162	386297	insomnia	5.66e-11	0.0421269	Astrocytes_control_ARL14EP	42.936
rs12225387	A	G	-0.662775	0.00140098	0.722035	11	74604767	0.00558983	0.8021	386584	insomnia	1.74e-13	0.0899648	Microglia_control_XRRA1	54.2734
rs12268145	C	A	-0.695121	0.0171462	0.891524	10	91580622	0.00852998	0.04442	382789	insomnia	3.85e-12	0.100122	Excitatory_control_LINC01374	48.2015
rs12277565	T	C	-0.83491	-0.0158733	0.891049	11	40808616	0.0084126	0.05918	377925	insomnia	3.85e-09	0.141733	Microglia_control_LRRC4C	34.7004
rs12300976	G	T	0.833362	0.00581689	0.914903	12	66655902	0.00969466	0.5485	385759	insomnia	4.18e-08	0.151992	Oligodendrocytes_control_LLPH	30.0624
rs12323869	G	A	1.40965	-0.001998	0.943154	14	50511897	0.0115788	0.863	379576	insomnia	9.37e-09	0.24551	Pericytes_control_SOS2	32.9674
rs12341282	T	C	-0.344183	-0.001998	0.671913	9	106913250	0.00705433	0.777	382355	insomnia	2.4e-09	0.0576698	Inhibitory_control_SMC2	35.619
rs12343	G	A	-0.301132	0.0149106	0.585028	18	5290174	0.00516989	0.003925	386461	insomnia	3.43e-10	0.0479679	Excitatory_control_LINC00667	39.4105
rs12345602	G	A	-0.336531	0.00796817	0.435807	9	129216466	0.00524618	0.1288	381230	insomnia	6.37e-09	0.0579552	Excitatory_control_MVB12B	33.7182
rs12363232	C	T	0.18334	0.0246001	0.658945	11	47623890	0.00535218	4.301e-06	386988	insomnia	3.51e-08	0.033251	Excitatory_control_MTCH2	30.4023
rs12366	G	T	-0.967816	0.0145047	0.609139	2	75185856	0.00520329	0.00531	386167	insomnia	5.89e-16	0.119607	Oligodendrocytes_control_LINC01291	65.4743
rs12366	G	T	-0.603357	0.0145047	0.609139	2	75185856	0.00520329	0.00531	386167	insomnia	1.71e-09	0.100175	Astrocytes_control_LINC01291	36.2766
rs12366	G	T	-0.677043	0.0145047	0.609139	2	75185856	0.00520329	0.00531	386167	insomnia	1.37e-13	0.0915014	Inhibitory_control_LINC01291	54.7492
rs12366	G	T	-0.797428	0.0145047	0.609139	2	75185856	0.00520329	0.00531	386167	insomnia	9.19e-16	0.0992162	Excitatory_control_LINC01291	64.5979
rs12373113	C	T	0.415593	-0.0119286	0.525537	16	30187513	0.00491329	0.01519	386564	insomnia	1.69e-08	0.0736739	Excitatory_control_SLX1B	31.8206
rs12375378	A	C	-0.843599	0.00410843	0.936108	8	12853625	0.0105514	0.697	385254	insomnia	4.34e-12	0.121807	Astrocytes_control_TRMT9B	47.9653
rs12411809	G	A	-1.04075	-0.00697561	0.914655	10	99818020	0.00977138	0.4753	370033	insomnia	3.5e-08	0.188726	Endothelial_control_HPSE2	30.4107
rs12413505	C	T	-0.802981	-0.00895974	0.812452	10	115532795	0.00681026	0.1883	385923	insomnia	1.16e-11	0.118345	Excitatory_control_PLEKHS1	46.0375
rs12419209	T	C	0.528367	-0.00498754	0.867044	11	494510	0.00735845	0.4979	385481	insomnia	1.31e-09	0.0870985	Excitatory_control_PTDSS2	36.8002
rs12423072	A	G	0.735898	0.00340579	0.636396	12	128799272	0.00528881	0.5196	385297	insomnia	3.36e-11	0.110996	Oligodendrocytes_control_TMEM132C	43.9562
rs12427846	T	C	0.393441	-0.00598207	0.757127	13	37491650	0.00612329	0.3286	382559	insomnia	4.29e-08	0.0718167	Excitatory_control_SMAD9	30.0129
rs12451788	A	G	0.442751	0.0100503	0.583917	17	1941048	0.00515033	0.05101	385697	insomnia	9.8e-12	0.0650205	Oligodendrocytes_control_DPH1	46.368
rs12451788	A	G	0.483544	0.0100503	0.583917	17	1941048	0.00515033	0.05101	385697	insomnia	2.69e-13	0.0661557	Excitatory_control_DPH1	53.4241
rs12461376	T	C	0.676436	-0.000100005	0.474331	19	17583661	0.00643462	0.9876	380078	insomnia	3.3e-15	0.0858528	Oligodendrocytes_control_SLC27A1	62.0789
rs12461849	G	A	0.360377	-0.001998	0.632012	19	35632634	0.00450924	0.6577	381484	insomnia	3.33e-10	0.0573616	Excitatory_control_LGI4	39.4705
rs12462870	T	C	0.307165	-0.001998	0.865781	19	9898846	0.00693919	0.7734	385422	insomnia	3.23e-08	0.0555597	Oligodendrocytes_control_ZNF846	30.565
rs12466404	G	A	-0.693927	0.0009995	0.399985	2	43860648	0.00720704	0.8897	384729	insomnia	9.19e-09	0.120787	Oligodendrocytes_control_PLEKHH2	33.0053
rs12468286	G	A	0.48571	-0.0009995	0.559494	2	10862188	0.00514949	0.8461	375125	insomnia	6.02e-13	0.0674594	Excitatory_control_ATP6V1C2	51.8405
rs12472204	A	G	-0.338614	0.00954541	0.616429	2	105372227	0.00525835	0.06948	384139	insomnia	7.9e-10	0.0550874	Excitatory_control_LINC01114	37.7839
rs12478097	T	C	0.368043	-0.00652122	0.498692	2	86395961	0.00510211	0.2012	386648	insomnia	3.37e-12	0.0528697	Excitatory_control_IMMT	48.4599
rs12480150	C	T	-0.855677	-0.0009995	0.845747	20	55443598	0.00634344	0.8748	385327	insomnia	5.67e-10	0.138029	Pericytes_control_FAM209B	38.4306
rs12495527	A	G	0.385568	-0.00498754	0.534829	3	129822950	0.00496994	0.3156	379303	insomnia	2.92e-09	0.0649548	Astrocytes_control_LINC02021	35.2354
rs1249587	C	T	0.490403	0.00399202	0.345895	11	68762995	0.00500609	0.4252	383011	insomnia	7.92e-16	0.0608782	Excitatory_control_MRGPRF	64.8906
rs12514010	G	A	-0.61175	0.00471108	0.768977	5	159633564	0.00607563	0.4381	384455	insomnia	7.53e-10	0.0993983	Astrocytes_control_FABP6	37.8783
rs12536356	A	C	-0.703568	0.0077298	0.740294	7	117082485	0.00583818	0.1855	385025	insomnia	4.12e-09	0.119665	Oligodendrocytes_control_WNT2	34.5684
rs12541786	G	A	-0.337999	0.0107577	0.708221	8	124116590	0.00562074	0.05563	386784	insomnia	1.77e-14	0.0440876	Astrocytes_control_TBC1D31	58.7758
rs12566254	A	C	-1.77009	-0.00399202	0.919085	1	91811592	0.00973644	0.6818	386786	insomnia	7.71e-20	0.19415	Oligodendrocytes_control_HFM1	83.1224
rs12569526	A	G	0.276809	0.00895974	0.461829	10	104237007	0.00515956	0.08247	386144	insomnia	9.85e-09	0.0482804	Inhibitory_control_MFSD13A	32.8714
rs12569956	T	C	-0.445918	-0.00299551	0.686967	10	88351579	0.00599996	0.6176	378079	insomnia	2.8e-10	0.0706758	Excitatory_control_LDB3	39.8079
rs12575200	T	C	-0.969057	0.00160128	0.722536	11	74582019	0.00580591	0.7827	386739	insomnia	2.98e-17	0.114719	Endothelial_control_XRRA1	71.356
rs12577359	C	T	0.690343	-0.00299551	0.868514	11	77723797	0.00720998	0.6778	386354	insomnia	8.79e-09	0.120005	Excitatory_control_CLNS1A	33.0925
rs12579766	G	A	-1.02255	-0.0109399	0.878837	12	102194591	0.00777858	0.1596	386988	insomnia	3.51e-19	0.114236	Oligodendrocytes_control_GNPTAB	80.125
rs12599591	C	T	0.741206	-0.00697561	0.780941	16	58115491	0.00635826	0.2726	384943	insomnia	1.19e-08	0.130006	Pericytes_control_CSNK2A2	32.5049
rs12602829	A	G	0.631277	0.0120726	0.855661	17	5204196	0.00728691	0.09757	386516	insomnia	4.19e-08	0.115139	Oligodendrocytes_control_RABEP1	30.0607
rs12604649	T	C	-0.350178	-0.0129162	0.56035	18	48732275	0.00525029	0.01389	384160	insomnia	3.4e-09	0.0592439	Excitatory_control_LINC01630	34.9373
rs12608494	C	T	-0.630701	0.00954541	0.670463	19	15885942	0.00539331	0.07675	384760	insomnia	4.91e-10	0.101365	Excitatory_control_OR10H5	38.7146
rs12610367	C	T	0.609685	-0.0009995	0.729463	19	22320848	0.00416391	0.8103	371649	insomnia	2.91e-11	0.091664	Oligodendrocytes_control_ZNF257	44.2399
rs12625748	T	C	-0.333282	0.00060018	0.851463	20	25326700	0.00684207	0.9301	386433	insomnia	4.1e-08	0.0607452	Excitatory_control_NINL	30.1023
rs12630412	C	T	-0.321395	0.00511305	0.844343	3	194402331	0.00708347	0.4704	384924	insomnia	3.33e-11	0.0484676	Excitatory_control_LSG1	43.9718
rs12652715	C	T	-0.322275	-0.00732678	0.198219	5	70896391	0.00648283	0.2584	386759	insomnia	2.06e-08	0.0574779	Oligodendrocytes_control_MCCC2	31.4377
rs12654977	G	A	-0.706151	-0.0246926	0.866979	5	134307718	0.00740618	0.0008559	386295	insomnia	2.18e-12	0.100558	Oligodendrocytes_control_TXNDC15	49.3128
rs12662611	C	T	-1.42707	-0.0129162	0.940444	6	29957077	0.0113997	0.2572	386979	insomnia	1.31e-13	0.19272	Inhibitory_control_RNF39	54.8321
rs12666487	G	A	0.885736	-0.0009995	0.578395	7	70687913	0.00427879	0.8153	386838	insomnia	4.36e-14	0.117317	Endothelial_control_GALNT17	57.0014
rs12677473	T	C	-0.327952	-0.00498754	0.749801	8	144756386	0.00576183	0.3867	383921	insomnia	3.45e-09	0.0555022	Excitatory_control_ZNF623	34.914
rs12683797	G	A	0.680075	0.00140098	0.755057	9	94649104	0.00584904	0.8107	385537	insomnia	2.26e-17	0.0802037	Excitatory_control_ROR2	71.8993
rs12693183	G	T	0.589784	-0.00895974	0.734966	2	180129445	0.00591136	0.1296	386064	insomnia	1.15e-16	0.0711572	Excitatory_control_SESTD1	68.6987
rs12700825	G	A	0.404374	-0.00390762	0.267032	7	27672571	0.00576384	0.4978	386902	insomnia	4.15e-12	0.0583343	Oligodendrocytes_control_HIBADH	48.0528
rs12710060	G	A	1.42999	-0.00895974	0.929214	19	1310537	0.0104604	0.3917	386988	insomnia	3.28e-08	0.258775	Pericytes_control_PTBP1	30.5368
rs1271906	T	C	0.28524	-0.001998	0.569823	10	7871724	0.00432232	0.6439	386296	insomnia	3.85e-08	0.0518863	Excitatory_control_ITIH2	30.2214
rs12725806	A	G	0.456617	0.00299551	0.464158	1	150766170	0.00458887	0.5139	386825	insomnia	2.25e-08	0.0816565	Inhibitory_control_CTSS	31.2696
rs12731843	T	G	-0.891641	0.00080032	0.936466	1	103491461	0.00996684	0.936	386988	insomnia	3.96e-08	0.162334	Oligodendrocytes_control_COL11A1	30.1692
rs12763624	C	T	0.449907	-0.0139029	0.760381	10	81924830	0.00595104	0.01948	386287	insomnia	9.89e-14	0.0604524	Astrocytes_control_ANXA11	55.3882
rs1276856	T	G	0.492542	0.00598207	0.280457	15	51155886	0.00527193	0.2565	385685	insomnia	1.27e-10	0.076592	Astrocytes_control_MIR4713HG	41.3542
rs12774848	T	C	0.33592	-0.00995033	0.664166	10	71932436	0.00554813	0.0729	382607	insomnia	4.32e-08	0.0613288	Oligodendrocytes_control_AIFM2	30.0014
rs12775501	C	T	0.794971	-0.001998	0.640941	10	90750909	0.00691409	0.7726	385633	insomnia	3.63e-21	0.0841883	Astrocytes_control_FAS	89.1661
rs12779966	G	A	-0.219881	0.0009995	0.364126	10	64169941	0.0102872	0.9226	386157	insomnia	1.45e-08	0.0387955	Excitatory_control_ZNF365	32.1228
rs12802800	C	T	0.632522	-0.0148886	0.913794	11	1018436	0.00944642	0.115	386704	insomnia	1.37e-08	0.111408	Excitatory_control_MUC6	32.2343
rs12815978	A	G	0.487372	-0.00399202	0.763451	12	19849490	0.00625899	0.5236	386988	insomnia	1.61e-08	0.0862748	Excitatory_control_LINC02398	31.912
rs12822052	A	G	-0.409326	-0.00230265	0.468353	12	66692528	0.00523268	0.6599	381623	insomnia	5.51e-11	0.0624297	Excitatory_control_HELB	42.9889
rs12831519	A	G	-0.988484	0.002002	0.759109	12	106682917	0.00582098	0.7309	383606	insomnia	4.92e-21	0.105035	Oligodendrocytes_control_CKAP4	88.5665
rs12880464	T	G	-0.344285	0.00498754	0.330167	14	76616471	0.00590228	0.3981	386525	insomnia	1.57e-09	0.0570278	Excitatory_control_ESRRB	36.4471
rs12899497	A	C	-0.70764	0.00399202	0.307117	15	89488070	0.0050881	0.4327	386020	insomnia	2.1e-12	0.100689	Oligodendrocytes_control_MFGE8	49.392
rs1290616	C	T	0.488564	0.00350614	0.604347	19	15751566	0.00521523	0.5014	382761	insomnia	3.69e-11	0.0738448	Astrocytes_control_CYP4F3	43.7727
rs1290617	T	G	0.441516	0.00400802	0.604306	19	15751897	0.00524763	0.445	383361	insomnia	7.09e-10	0.0716278	Excitatory_control_CYP4F3	37.9953
rs12906846	G	A	-0.385621	-0.00697561	0.57349	15	78825295	0.00515739	0.1762	384010	insomnia	3.21e-09	0.0651327	Oligodendrocytes_control_CHRNA5	35.0528
rs12911040	G	A	0.392053	-0.0009995	0.808499	15	90843709	0.00450972	0.8246	379446	insomnia	8.55e-09	0.0680969	Excitatory_control_ZNF774	33.1462
rs12923750	A	G	-0.661677	0.00270365	0.621049	16	55877283	0.00533632	0.6124	378998	insomnia	3.17e-08	0.119617	Astrocytes_control_CES1	30.5989
rs12927572	G	A	-1.43923	-0.0119286	0.939883	16	89309655	0.0109297	0.2751	386988	insomnia	2.76e-08	0.25904	Inhibitory_control_SLC22A31	30.8693
rs12932206	A	G	-0.838398	0.0077298	0.600782	16	10066021	0.00523377	0.1397	379677	insomnia	2.62e-18	0.0960713	Oligodendrocytes_control_GRIN2A	76.1575
rs12939282	G	T	-0.659721	-0.000700245	0.31778	17	67129129	0.00530569	0.895	382665	insomnia	6.95e-09	0.113899	Oligodendrocytes_control_ABCA9	33.5492
rs1296816	G	A	1.54483	0.00692392	0.939204	22	18071444	0.011044	0.5307	384702	insomnia	5.41e-11	0.235526	Pericytes_control_PEX26	43.0214
rs12975286	G	A	-0.417417	0.0082338	0.849676	19	56921695	0.00728692	0.2585	381512	insomnia	4.83e-09	0.0713169	Excitatory_control_ZNF667	34.2575
rs12985137	C	T	-0.719195	-0.0158246	0.449607	19	53617818	0.00514737	0.00211	382158	insomnia	1.45e-12	0.101592	Oligodendrocytes_control_ZNF160	50.1153
rs12985137	C	T	-0.54607	-0.0158246	0.449607	19	53617818	0.00514737	0.00211	382158	insomnia	5.26e-15	0.0698253	Oligodendrocytes_control_ZNF415	61.1604
rs12985137	C	T	-0.484046	-0.0158246	0.449607	19	53617818	0.00514737	0.00211	382158	insomnia	2.62e-14	0.0635566	Oligodendrocytes_control_ZNF347	58.0032
rs12986226	T	C	-0.434674	0.00340579	0.876858	19	33639079	0.00789783	0.6663	386524	insomnia	4.04e-08	0.0791901	Excitatory_control_WDR88	30.129
rs13001657	G	A	-0.404782	0.00833464	0.706781	2	88946611	0.00561478	0.1377	383017	insomnia	1.61e-10	0.0633049	Astrocytes_control_RPIA	40.8853
rs13005379	C	T	-0.679871	-0.00060018	0.37753	2	9420428	0.0051375	0.907	384213	insomnia	1.57e-20	0.0731981	Oligodendrocytes_control_ASAP2	86.2688
rs13009117	C	T	0.251006	0.002002	0.767803	2	175277552	0.00597553	0.7376	386297	insomnia	4.41e-11	0.0380911	Excitatory_control_SCRN3	43.4229
rs13016313	C	A	0.455091	-0.00230265	0.459203	2	27045207	0.00511368	0.6525	384938	insomnia	1.39e-11	0.0673278	Oligodendrocytes_control_DPYSL5	45.6885
rs13022357	A	G	0.565751	0.0009995	0.10495	2	160069756	0.00650581	0.8779	386988	insomnia	4.03e-12	0.0815674	Excitatory_control_WDSUB1	48.1079
rs13029674	G	A	-0.65769	0.013592	0.885351	2	38887999	0.00813792	0.09488	383876	insomnia	2.8e-14	0.0864538	Excitatory_control_GALM	57.8729
rs13036140	G	A	-1.17815	-0.00399202	0.893701	2	127246019	0.00840955	0.635	379885	insomnia	2.18e-08	0.210496	Excitatory_control_LINC01941	31.3267
rs130605	A	G	-0.342368	0.00498754	0.471509	22	37410368	0.00554148	0.3681	372807	insomnia	3.72e-08	0.0622089	Oligodendrocytes_control_TST	30.2887
rs13084187	A	G	0.363858	0.0182658	0.853748	3	33154877	0.00721386	0.01134	381698	insomnia	9.55e-09	0.0634064	Oligodendrocytes_control_CRTAP	32.9305
rs13132330	C	A	-1.81452	0.0010005	0.930093	4	156082759	0.00938486	0.9151	386988	insomnia	2.92e-24	0.178553	Oligodendrocytes_control_NPY2R	103.273
rs13134490	C	T	-0.525333	-0.00498754	0.851245	4	156933103	0.00746929	0.5043	386464	insomnia	1.88e-08	0.0934283	Oligodendrocytes_control_CTSO	31.6165
rs13137552	T	C	-0.602641	-0.00410843	0.497189	4	88715324	0.00518673	0.4283	375684	insomnia	1.2e-11	0.088876	Inhibitory_control_IBSP	45.9778
rs13161048	C	T	0.729306	-0.0109399	0.579678	5	148615269	0.00503016	0.02964	385974	insomnia	2.49e-16	0.0889857	Astrocytes_control_ABLIM3	67.1707
rs13164140	G	A	0.53775	-0.00697561	0.76958	5	74030338	0.00600012	0.245	383423	insomnia	2.22e-09	0.0899108	Excitatory_control_GFM2	35.7715
rs1317149	C	T	0.204474	0.0232686	0.656724	11	47486885	0.00534182	1.325e-05	386355	insomnia	2.28e-08	0.0365821	Inhibitory_control_MTCH2	31.242
rs13171814	G	A	-0.323177	-0.00498754	0.899441	5	125916032	0.00925365	0.5899	386107	insomnia	1.96e-08	0.0575467	Excitatory_control_ALDH7A1	31.5384
rs13197564	C	T	-0.556803	0.0109399	0.374533	6	42184400	0.00529228	0.03872	386122	insomnia	6.26e-16	0.0688757	Excitatory_control_GUCA1B	65.3538
rs13200571	A	C	-0.644648	0.00130085	0.877278	6	31271511	0.00772657	0.8663	386771	insomnia	8.91e-09	0.112109	Excitatory_control_HLA-B	33.0647
rs1323696	T	C	-0.523238	0.0129162	0.470732	13	76130761	0.0049156	0.008599	386647	insomnia	2.13e-20	0.0565307	Excitatory_control_COMMD6	85.6701
rs13239942	G	A	-0.254295	-0.00591747	0.352197	7	7578534	0.00539602	0.2728	383058	insomnia	4.32e-08	0.046427	Inhibitory_control_COL28A1	30.0008
rs13252381	C	T	0.525718	-0.00491204	0.427219	8	144822591	0.00520269	0.3451	380693	insomnia	3.75e-15	0.0668603	Excitatory_control_FAM83H	61.8257
rs13292541	T	C	0.506233	0.00150113	0.75292	9	4715091	0.00581812	0.7964	378177	insomnia	6.37e-09	0.0871786	Oligodendrocytes_control_AK3	33.7195
rs1332018	G	T	-0.55042	-0.00260339	0.419538	1	110282972	0.00508543	0.6087	383294	insomnia	9e-21	0.0588858	Excitatory_control_GSTM3	87.3711
rs1332018	G	T	-0.30122	-0.00260339	0.419538	1	110282972	0.00508543	0.6087	383294	insomnia	7.88e-09	0.0521956	Inhibitory_control_GSTM3	33.3042
rs13329076	C	T	0.416563	-0.0148886	0.550842	15	40853666	0.00526306	0.004671	386644	insomnia	3.37e-28	0.0378302	Excitatory_control_CCDC32	121.25
rs13329076	C	T	0.40778	-0.0148886	0.550842	15	40853666	0.00526306	0.004671	386644	insomnia	1.29e-17	0.047724	Inhibitory_control_CCDC32	73.0095
rs133301	C	T	-0.326116	-0.00995033	0.524643	22	42390093	0.00522095	0.05667	386804	insomnia	4.48e-11	0.0495064	Excitatory_control_WBP2NL	43.3932
rs1333124	C	T	-0.587394	-0.00400802	0.411368	1	109258150	0.00523382	0.4438	385049	insomnia	2.22e-11	0.0877881	Oligodendrocytes_control_FNDC7	44.7701
rs133383	C	T	-0.301114	-0.0119286	0.549672	22	42473603	0.00522339	0.02239	385851	insomnia	1.22e-08	0.0528603	Excitatory_control_NAGA	32.4492
rs13423976	A	G	-0.612501	-0.00370686	0.268274	2	38745624	0.00579096	0.5221	386988	insomnia	1.05e-08	0.107038	OPCs_control_LINC02613	32.7443
rs13426364	C	T	0.474985	-0.00299551	0.701659	2	68977254	0.00563026	0.5947	379567	insomnia	6.78e-15	0.0609855	Excitatory_control_ARHGAP25	60.6605
rs1345657	G	A	0.266757	0.000100005	0.654384	19	35380198	0.00362647	0.978	381859	insomnia	1.09e-10	0.0413283	Excitatory_control_ZNF30	41.6616
rs1349771	T	C	-0.465191	-0.00399202	0.637115	11	5911342	0.00551799	0.4694	386397	insomnia	2.75e-08	0.0837215	Inhibitory_control_TRIM5	30.8737
rs1361929	T	C	-0.358908	0.00430927	0.575238	11	94011852	0.00514637	0.4024	383555	insomnia	3.95e-08	0.065339	Excitatory_control_GPR83	30.1732
rs136448	G	A	-0.623094	0.00598207	0.496973	22	32582654	0.00471254	0.2043	385592	insomnia	1.7e-11	0.0925842	Excitatory_control_RFPL3	45.2933
rs1383095	G	A	0.317184	0.00110061	0.64181	8	145615776	0.00522925	0.8333	385015	insomnia	1.11e-10	0.0491691	Excitatory_control_CPSF1	41.6138
rs1385453	A	G	-0.380247	-0.00995033	0.647079	9	4671022	0.00512207	0.05206	386285	insomnia	4.87e-09	0.0649839	OPCs_control_SPATA6L	34.2389
rs1386504	A	C	-0.457657	0.00501254	0.627136	20	44351515	0.00525333	0.34	386177	insomnia	9.16e-10	0.0747391	Astrocytes_control_WFDC10B	37.496
rs138659652	C	T	-0.41566	-0.00299551	0.867019	2	48655341	0.00679865	0.6595	383633	insomnia	1.18e-10	0.0645193	Excitatory_control_FOXN2	41.5046
rs1388273	A	G	0.276538	-0.0170444	0.487852	3	73074742	0.00512014	0.0008719	384139	insomnia	2.36e-09	0.0463162	Oligodendrocytes_control_PPP4R2	35.6487
rs1407636	G	T	0.509888	-0.00498754	0.752869	13	50333882	0.00575577	0.3862	386762	insomnia	7.79e-13	0.0711648	Oligodendrocytes_control_EBPL	51.3356
rs141321156	G	A	-1.7961	-0.001998	0.942737	1	223868940	0.0121143	0.869	385309	insomnia	9.94e-16	0.223741	Inhibitory_control_CAPN8	64.4423
rs1422968	A	G	-0.568566	0.00310481	0.72724	5	147717357	0.0057745	0.5908	386864	insomnia	9.41e-09	0.0990354	Inhibitory_control_SPINK9	32.9596
rs142713340	C	T	1.28396	0.00430927	0.805531	15	24487379	0.00638596	0.4998	385821	insomnia	8.54e-14	0.172072	Oligodendrocytes_control_PWRN1	55.6775
rs142713340	C	T	0.953326	0.00430927	0.805531	15	24487379	0.00638596	0.4998	385821	insomnia	4.81e-08	0.174662	Oligodendrocytes_control_NPAP1	29.7911
rs1430337	A	G	0.837452	0.0168571	0.257159	10	77327020	0.00569161	0.003059	386654	insomnia	7.38e-11	0.128588	Astrocytes_control_LRMDA	42.4147
rs143649705	G	A	-1.14147	0.0133892	0.930843	17	5154016	0.0106177	0.2073	374402	insomnia	1.24e-09	0.187903	OPCs_control_USP6	36.9028
rs143932109	A	C	-1.89078	0.0116678	0.929959	5	96500242	0.0099365	0.2403	386814	insomnia	9.49e-23	0.192599	Microglia_control_LINC01340	96.3778
rs1440293	A	G	-0.376418	0.00672255	0.604944	8	2001625	0.00520022	0.1961	384268	insomnia	1.6e-10	0.0588595	Excitatory_control_MYOM2	40.8985
rs1441928	T	C	0.319908	-0.00300451	0.493636	11	101790671	0.00515888	0.5603	386988	insomnia	7.96e-09	0.0554507	Excitatory_control_CFAP300	33.284
rs145011462	G	A	-0.83969	-0.001998	0.938903	17	7291175	0.010362	0.8471	386706	insomnia	2.4e-08	0.150468	Inhibitory_control_ODF4	31.1424
rs145304894	C	T	-0.444715	0.00722605	0.910248	17	76434691	0.00889923	0.4168	385977	insomnia	2.95e-08	0.0802108	Excitatory_control_DNAH17	30.7396
rs145506664	G	A	-0.670865	-0.00796817	0.922605	19	5981598	0.00895177	0.3734	386088	insomnia	8.15e-11	0.103244	Excitatory_control_CAPS	42.2218
rs1474043	G	A	0.212411	-0.00914166	0.383098	18	12951738	0.00525264	0.08179	381342	insomnia	1.5e-08	0.0375149	Oligodendrocytes_control_CEP192	32.0588
rs1481804	A	G	-0.56044	0.00895974	0.484782	8	71969430	0.00510902	0.07948	383118	insomnia	1.16e-15	0.0699768	Excitatory_control_XKR9	64.1431
rs1481804	A	G	-0.474346	0.00895974	0.484782	8	71969430	0.00510902	0.07948	383118	insomnia	1e-16	0.0571195	Inhibitory_control_XKR9	68.964
rs1493860	G	T	0.645118	-0.000300045	0.160305	12	70221981	0.00764664	0.9687	385929	insomnia	3.91e-11	0.0976338	Inhibitory_control_MYRFL	43.6594
rs149465829	C	T	-1.37943	0.0082338	0.934764	6	33612597	0.0105541	0.4353	380528	insomnia	1.23e-08	0.242182	Endothelial_control_LINC00336	32.4427
rs1502281	T	C	0.590061	-0.00300451	0.271046	11	100503384	0.00581053	0.6051	383552	insomnia	3.99e-11	0.0893421	Oligodendrocytes_control_ARHGAP42	43.6196
rs151045855	T	C	-0.471733	-0.0009995	0.921601	15	82533441	0.00683869	0.8838	386960	insomnia	1.63e-09	0.0782237	Astrocytes_control_SAXO2	36.3677
rs1522318	C	T	-0.453475	-0.0139029	0.74454	12	81781925	0.0058409	0.0173	385799	insomnia	4.54e-08	0.0829273	Oligodendrocytes_control_PPFIA2	29.9028
rs1537041	C	T	0.245615	-0.001998	0.598564	9	33060416	0.00642987	0.756	386784	insomnia	3.89e-09	0.0417092	Oligodendrocytes_control_APTX	34.6775
rs1548198	T	C	0.695434	-0.0119714	0.191941	8	8178223	0.00647602	0.06452	386109	insomnia	1.45e-08	0.122708	Oligodendrocytes_control_PRAG1	32.1191
rs1562330	C	T	0.475925	-0.0009995	0.602689	8	27098436	0.00397973	0.8017	381416	insomnia	5.7e-14	0.0633317	Oligodendrocytes_control_TRIM35	56.4721
rs15911	C	T	0.373264	-0.00598207	0.781468	1	85029077	0.00623965	0.3377	380718	insomnia	4.12e-13	0.0514736	Excitatory_control_SPATA1	52.5853
rs160666	A	C	-0.299725	-0.00995033	0.711653	6	2774052	0.00551275	0.07108	386212	insomnia	9.31e-12	0.043969	Excitatory_control_MYLK4	46.4677
rs1611219	C	T	0.383863	-0.0168571	0.635248	6	29761726	0.0059595	0.004675	386980	insomnia	3.07e-09	0.0647579	Excitatory_control_HLA-F	35.1372
rs163369	C	T	-0.426784	-0.00240288	0.259764	17	15569108	0.00594548	0.6861	374393	insomnia	7.21e-11	0.0654964	Excitatory_control_TBC1D26	42.4602
rs1634775	A	G	0.420996	-0.00742752	0.37534	6	31303236	0.00563923	0.1878	386741	insomnia	4.58e-09	0.0718202	Excitatory_control_HLA-C	34.3608
rs163619	G	T	0.503983	-0.00598207	0.557964	5	111812245	0.00488041	0.2203	381565	insomnia	3.07e-09	0.0850171	Oligodendrocytes_control_EPB41L4A	35.1415
rs1661052	G	A	0.751395	0.00895974	0.0925096	11	2942593	0.00846233	0.2897	386988	insomnia	2.09e-10	0.118245	Excitatory_control_SLC22A18	40.3802
rs1677700	T	G	0.200809	-0.0109399	0.728533	5	79931419	0.0057753	0.05819	386975	insomnia	7.63e-09	0.0347637	Excitatory_control_MSH3	33.3669
rs16839422	A	G	-0.925488	-0.0119286	0.847159	1	4730964	0.0070295	0.08971	383235	insomnia	1.21e-12	0.130266	Endothelial_control_AJAP1	50.475
rs16874768	C	T	-0.68185	-0.00140098	0.434455	8	107509019	0.00533612	0.7929	381401	insomnia	4.31e-15	0.0869076	Oligodendrocytes_control_OXR1	61.5549
rs16967494	C	T	-0.47227	-0.00498754	0.719211	16	15820863	0.0055069	0.3651	386988	insomnia	4.64e-11	0.0717511	Oligodendrocytes_control_MYH11	43.3236
rs16982564	G	A	-0.718436	0.00853633	0.85813	22	27054179	0.00733635	0.2446	381119	insomnia	1.75e-15	0.0902801	OPCs_control_MIAT	63.3274
rs17046778	T	G	-0.798908	-0.00895974	0.839637	2	55459373	0.00677944	0.1863	386988	insomnia	9.68e-19	0.0903874	Oligodendrocytes_control_CLHC1	78.1229
rs17046778	T	G	0.790111	-0.00895974	0.839637	2	55459373	0.00677944	0.1863	386988	insomnia	3.88e-23	0.0797515	Excitatory_control_CLHC1	98.1517
rs17046778	T	G	0.587314	-0.00895974	0.839637	2	55459373	0.00677944	0.1863	386988	insomnia	2.29e-16	0.0715733	Inhibitory_control_CLHC1	67.3348
rs17046778	T	G	-0.501851	-0.00895974	0.839637	2	55459373	0.00677944	0.1863	386988	insomnia	1.58e-15	0.0629621	OPCs_control_CLHC1	63.5318
rs1705547	T	G	-0.660304	-0.0139029	0.724653	18	47715721	0.00567724	0.01433	386988	insomnia	1.28e-09	0.108785	Microglia_control_MYO5B	36.8427
rs1706785	C	T	-0.392038	0.00498754	0.230712	15	45593324	0.00642936	0.4379	386988	insomnia	4.8e-11	0.059608	Excitatory_control_SLC28A2	43.256
rs17080333	A	C	-0.548152	-0.001998	0.698983	4	190895386	0.00681845	0.7695	370142	insomnia	4.15e-13	0.0756014	OPCs_control_FRG1-DT	52.5705
rs17105995	A	G	0.750859	0.00531409	0.838719	12	69367040	0.00682496	0.4362	386375	insomnia	3.49e-09	0.127119	Oligodendrocytes_control_CPM	34.8895
rs17129021	C	T	0.4402	0.00796817	0.304515	14	93819544	0.00552439	0.1492	384867	insomnia	3.06e-08	0.0794853	Excitatory_control_UNC79	30.6709
rs17144112	T	C	-1.11499	0.00853633	0.889506	11	82403830	0.00820903	0.2984	385968	insomnia	5.7e-11	0.170188	Astrocytes_control_MIR4300HG	42.9224
rs17243791	A	G	-0.878929	-0.00895974	0.751782	5	81322547	0.00585424	0.1259	386753	insomnia	4.65e-22	0.0910262	Excitatory_control_ATG10	93.2341
rs17251987	C	T	-0.870426	0.00521357	0.902506	9	33388289	0.00874375	0.551	380446	insomnia	3.13e-14	0.114641	Excitatory_control_AQP7	57.6481
rs17334422	T	C	-1.02793	-0.00399202	0.619519	2	187576877	0.00580969	0.492	386903	insomnia	1.03e-20	0.110139	Oligodendrocytes_control_FAM171B	87.1055
rs17350057	T	C	0.981426	0.00270365	0.761648	4	142131620	0.00602463	0.6536	373759	insomnia	5.14e-21	0.104338	Microglia_control_RNF150	88.4768
rs17366947	A	G	0.997627	-0.0009995	0.60335	8	27103024	0.00634344	0.8748	382285	insomnia	1.48e-20	0.107339	Oligodendrocytes_control_STMN4	86.382
rs17375748	C	T	-1.19839	0.00140098	0.936447	1	160010151	0.0112279	0.9007	375627	insomnia	2.12e-08	0.213921	Microglia_control_CFAP45	31.3825
rs17480798	G	A	-0.834751	0.00150113	0.774542	12	26878766	0.00607082	0.8047	386094	insomnia	5.95e-14	0.111162	Oligodendrocytes_control_ITPR2	56.3894
rs1754182	C	T	-0.414718	-0.00934352	0.419134	7	76229947	0.00515432	0.06987	386988	insomnia	9.16e-14	0.055648	Excitatory_control_ZP3	55.54
rs17553284	C	T	0.305194	0.00682323	0.766683	13	43597706	0.0059842	0.2542	386641	insomnia	2.47e-10	0.0482243	Astrocytes_control_DNAJC15	40.0517
rs17588305	C	T	0.588187	-0.00895974	0.885929	15	45021766	0.00814807	0.2715	384354	insomnia	3.21e-10	0.0935342	Excitatory_control_TRIM69	39.5449
rs17588305	C	T	0.677334	-0.00895974	0.885929	15	45021766	0.00814807	0.2715	384354	insomnia	1.69e-11	0.100632	Inhibitory_control_TRIM69	45.3033
rs17590021	A	G	0.946718	0.00712532	0.83076	8	17507299	0.00682099	0.2962	382044	insomnia	3.34e-08	0.171418	Oligodendrocytes_control_MTUS1	30.5019
rs17612852	G	A	0.683605	-0.0111621	0.253442	6	32620572	0.00597926	0.06193	383639	insomnia	2.15e-08	0.122082	Excitatory_control_HLA-DQA1	31.3548
rs17624339	A	G	0.375875	0.00662188	0.76871	13	43612074	0.00600192	0.2699	384171	insomnia	4.42e-23	0.0379906	Excitatory_control_DNAJC15	97.889
rs17650129	G	T	-0.770274	-0.00299551	0.748111	5	16487330	0.00537896	0.5776	376604	insomnia	6.8e-20	0.0843606	Excitatory_control_LINC02150	83.3702
rs17650129	G	T	-0.712013	-0.00299551	0.748111	5	16487330	0.00537896	0.5776	376604	insomnia	2.69e-11	0.106866	Inhibitory_control_LINC02150	44.3909
rs17698176	T	G	-0.590709	-0.00796817	0.780487	17	44819595	0.00608812	0.1906	376824	insomnia	3.66e-10	0.0942452	Oligodendrocytes_control_NSF	39.2852
rs17698176	T	G	-0.408079	-0.00796817	0.780487	17	44819595	0.00608812	0.1906	376824	insomnia	1.05e-08	0.0713114	OPCs_control_NSF	32.7469
rs17698823	C	T	-0.429509	0.0178399	0.402067	22	32887732	0.00506483	0.0004278	386610	insomnia	4.82e-13	0.0594031	Oligodendrocytes_control_FBXO7	52.2789
rs17702978	G	T	-0.334341	-0.00697561	0.719837	15	51160555	0.00606519	0.2501	386156	insomnia	7.1e-10	0.0542432	Excitatory_control_MIR4713HG	37.9917
rs1770581	C	T	0.559165	-0.0139029	0.794913	1	108722953	0.0064171	0.03027	385914	insomnia	2.24e-10	0.0881399	Inhibitory_control_SLC25A24	40.2471
rs17741	C	T	-0.310472	0.00541463	0.542272	17	48458925	0.00512783	0.291	386096	insomnia	3.72e-10	0.049554	Oligodendrocytes_control_XYLT2	39.2544
rs1774777	A	C	0.292586	-0.00150113	0.453541	1	111585347	0.00527087	0.7758	385171	insomnia	4.15e-11	0.0443403	Excitatory_control_DRAM2	43.5423
rs1775711	C	T	0.280934	-0.0009995	0.709601	1	116567296	0.00381259	0.7932	380565	insomnia	4.01e-09	0.0477471	Excitatory_control_LINC01649	34.6191
rs17806132	G	A	0.210761	0.00190181	0.850182	2	190708287	0.0071101	0.7891	383250	insomnia	4.55e-08	0.0385441	Excitatory_control_ASNSD1	29.8994
rs1781424	G	A	0.334592	0.00598207	0.494249	1	151742960	0.00541297	0.2691	386743	insomnia	3.73e-08	0.0607996	Excitatory_control_TDRKH	30.2852
rs17818315	C	T	0.28586	0.00732678	0.728543	2	46818992	0.00566762	0.1961	386988	insomnia	1.35e-08	0.0503312	Oligodendrocytes_control_PIGF	32.2575
rs1788973	T	C	0.512579	-0.00895974	0.64471	11	70123737	0.00523222	0.08682	386417	insomnia	1.06e-13	0.068955	Excitatory_control_PPFIA1	55.2574
rs1800633	G	A	-0.31352	-0.00796817	0.716572	12	54063501	0.00574433	0.1654	385590	insomnia	4.94e-09	0.053601	Inhibitory_control_ATP5MC2	34.2126
rs1809148	G	A	0.64336	0.00330546	0.863433	8	144663075	0.00764808	0.6656	386525	insomnia	2.76e-13	0.0880643	Astrocytes_control_NAPRT	53.3713
rs1836768	A	G	-0.631015	-0.00598207	0.576726	1	242311490	0.00514551	0.245	385897	insomnia	1.43e-09	0.10426	OPCs_control_PLD5	36.6306
rs1842947	A	G	-0.741078	-0.00190181	0.483481	17	3316976	0.00514969	0.7119	377039	insomnia	1.84e-11	0.110306	Microglia_control_OR3A2	45.1369
rs1844386	C	T	0.370134	-0.001998	0.731131	2	10953844	0.00698353	0.7748	385250	insomnia	1.39e-08	0.0652308	Inhibitory_control_HPCAL1	32.1968
rs1850323	C	T	-0.466335	0.00399202	0.317363	15	89472345	0.0061873	0.5188	385686	insomnia	9.91e-09	0.0813516	OPCs_control_MFGE8	32.8597
rs1854937	T	C	1.34102	-0.0145047	0.0866906	13	74881437	0.00989534	0.1427	385044	insomnia	2.9e-08	0.241737	Excitatory_control_LINC00347	30.7741
rs1862450	G	A	-0.635388	0.00190181	0.810244	16	24856775	0.00655452	0.7717	386988	insomnia	2.07e-10	0.0999647	Astrocytes_control_SLC5A11	40.4002
rs1877873	G	A	-0.750815	0.00300451	0.875602	2	166333323	0.00764718	0.6944	386224	insomnia	1.16e-08	0.131597	Oligodendrocytes_control_CSRNP3	32.5515
rs1898155	T	C	-0.872977	-0.00598207	0.575953	1	242314304	0.00497715	0.2294	386156	insomnia	9.46e-17	0.105034	Astrocytes_control_PLD5	69.0786
rs1898737	G	A	0.317445	0.00697561	0.27131	16	4518205	0.00579258	0.2285	385918	insomnia	2.94e-11	0.0477391	Oligodendrocytes_control_NMRAL1	44.217
rs1901	G	A	0.62521	0.000500125	0.658938	3	14712473	0.00505574	0.9212	386976	insomnia	2.45e-14	0.0820024	Astrocytes_control_C3orf20	58.1297
rs1901	G	A	0.654673	0.000500125	0.658938	3	14712473	0.00505574	0.9212	386976	insomnia	7.18e-21	0.0698609	Excitatory_control_C3orf20	87.8174
rs1904692	G	A	0.780744	0.00400802	0.532717	10	52915936	0.00508967	0.431	386191	insomnia	2.44e-13	0.106626	Astrocytes_control_PRKG1	53.6159
rs1934899	G	A	-0.563931	0.0109399	0.323511	6	70546654	0.00549342	0.04643	386630	insomnia	2.28e-10	0.0889318	OPCs_control_COL19A1	40.2104
rs1935116	T	C	0.407012	-0.00140098	0.213325	1	13945919	0.00637289	0.826	379862	insomnia	2.98e-08	0.0734338	Excitatory_control_PDPN	30.7202
rs1960340	C	A	-0.730108	0.00240288	0.679703	14	48298665	0.00555973	0.6656	385854	insomnia	3.99e-09	0.124072	Inhibitory_control_LINC00648	34.6282
rs1961503	C	T	0.229131	-0.0188218	0.725461	6	158593580	0.00588015	0.00137	386697	insomnia	2.92e-09	0.0385996	Excitatory_control_GTF2H5	35.2373
rs1974981	A	G	0.599244	-0.00498754	0.745586	15	45729123	0.00640836	0.4364	386988	insomnia	4.79e-13	0.0828712	Oligodendrocytes_control_GATM	52.2878
rs1986761	C	T	0.397867	-0.00895974	0.548254	7	141442811	0.0051535	0.08211	376416	insomnia	3.19e-09	0.0671912	Astrocytes_control_MGAM	35.0632
rs1992020	T	C	-1.16537	0.00260339	0.881891	4	175033838	0.00793678	0.7429	385194	insomnia	6.22e-23	0.118194	Excitatory_control_LINC02268	97.216
rs1992020	T	C	-1.65557	0.00260339	0.881891	4	175033838	0.00793678	0.7429	385194	insomnia	4.95e-28	0.150827	OPCs_control_LINC02268	120.485
rs199348	C	A	0.684002	-0.001998	0.595883	7	23293098	0.00458059	0.6627	386155	insomnia	1.42e-10	0.10665	OPCs_control_GPNMB	41.1334
rs199451	G	A	-0.911028	0.0101514	0.794174	17	44801784	0.0062097	0.1021	386898	insomnia	1.89e-11	0.135693	OPCs_control_LRRC37A2	45.0766
rs199525	T	G	-1.38594	0.0105555	0.792765	17	44847834	0.00622152	0.08977	385108	insomnia	1.28e-20	0.148868	Oligodendrocytes_control_KANSL1	86.6739
rs199534	T	G	-1.11063	0.0105555	0.794336	17	44824213	0.00621396	0.08938	386183	insomnia	1.15e-18	0.125927	Microglia_control_KANSL1	77.7864
rs2005230	C	T	-0.716071	-0.00697561	0.669456	1	212639390	0.0051729	0.1775	377172	insomnia	4.57e-11	0.108752	Oligodendrocytes_control_LINC01740	43.3551
rs2007836	T	C	1.06979	-0.00180162	0.180386	22	43693733	0.00695136	0.7955	381684	insomnia	1.34e-11	0.158145	Endothelial_control_SCUBE1	45.7599
rs2010623	A	G	0.321981	-0.00498754	0.516076	16	89729025	0.0052228	0.3396	384922	insomnia	3.69e-10	0.0513796	Excitatory_control_CDK10	39.2717
rs2015412	C	T	-0.483858	0.00420884	0.718976	18	590969	0.00573093	0.4627	374744	insomnia	8.12e-09	0.083915	Excitatory_control_CLUL1	33.2473
rs2015412	C	T	-0.584451	0.00420884	0.718976	18	590969	0.00573093	0.4627	374744	insomnia	4.03e-10	0.0934692	Inhibitory_control_CLUL1	39.0984
rs2020944	G	A	0.772227	0.00895974	0.317645	21	45542593	0.0054156	0.09804	382197	insomnia	2.23e-14	0.101122	Inhibitory_control_PWP2	58.3179
rs2020944	G	A	1.0715	0.00895974	0.317645	21	45542593	0.0054156	0.09804	382197	insomnia	2.21e-23	0.107549	Oligodendrocytes_control_PWP2	99.2594
rs2023238	A	G	0.477955	0.00598207	0.307567	6	84282761	0.00540393	0.2683	384701	insomnia	2.76e-10	0.0757236	Oligodendrocytes_control_SNAP91	39.8392
rs2023793	G	A	-0.954363	-0.001998	0.561153	7	24759063	0.00664325	0.7636	383817	insomnia	3.53e-21	0.101035	Oligodendrocytes_control_GSDME	89.2235
rs2028205	A	G	-0.6358	-0.0102524	0.420347	10	60389001	0.00516178	0.04701	386256	insomnia	3.32e-15	0.0807046	Inhibitory_control_BICC1	62.0647
rs2044476	G	T	-0.349272	-0.00598207	0.78783	2	85738878	0.00607789	0.325	376605	insomnia	5.61e-09	0.0599304	Excitatory_control_VAMP8	33.9651
rs204937	C	T	-0.500678	0.00399202	0.441801	11	8280938	0.00489533	0.4148	371006	insomnia	4.07e-09	0.0851304	Microglia_control_LMO1	34.5898
rs2059483	C	T	0.45015	-0.00160128	0.408043	4	37828186	0.00527129	0.7613	383579	insomnia	2.04e-08	0.0802592	Oligodendrocytes_control_PGM2	31.4575
rs2059640	T	C	0.263231	0.00833464	0.51698	8	67379750	0.00510137	0.1023	386198	insomnia	1.13e-08	0.0460944	Astrocytes_control_VXN	32.6122
rs2065959	T	C	0.382443	0.0198026	0.339902	1	245206459	0.00536714	0.0002246	382772	insomnia	1.98e-08	0.0681221	Inhibitory_control_EFCAB2	31.5179
rs2067418	T	C	-0.56427	0.0125788	0.758877	2	191226932	0.00596484	0.03496	386821	insomnia	4.58e-14	0.0748044	Inhibitory_control_INPP1	56.901
rs2068755	A	G	-0.896275	-0.00895974	0.923317	10	63433281	0.0103311	0.3858	386601	insomnia	3.8e-13	0.123414	Excitatory_control_CABCOCO1	52.7415
rs2070203	G	A	0.378665	0.00742752	0.507632	16	70303580	0.00510901	0.146	386988	insomnia	1.6e-14	0.049311	Oligodendrocytes_control_EXOSC6	58.9689
rs2070966	G	T	0.769391	-0.00598207	0.623092	2	85922860	0.00568521	0.2927	386208	insomnia	8.77e-13	0.10763	Microglia_control_GNLY	51.1009
rs2071639	C	A	-1.01558	0.0184695	0.881675	2	3628383	0.00790184	0.01942	386988	insomnia	5.91e-14	0.135229	Excitatory_control_COLEC11	56.4016
rs2071639	C	A	-0.91961	0.0184695	0.881675	2	3628383	0.00790184	0.01942	386988	insomnia	1.72e-10	0.144045	Inhibitory_control_COLEC11	40.7578
rs2071639	C	A	-1.25063	0.0184695	0.881675	2	3628383	0.00790184	0.01942	386988	insomnia	1.14e-14	0.161943	Excitatory_control_ALLC	59.639
rs2072721	G	A	0.746013	0.0140989	0.688399	22	45596249	0.0055407	0.01094	380100	insomnia	6.77e-09	0.128698	Oligodendrocytes_control_KIAA0930	33.6006
rs2072741	C	T	-0.529934	-0.00598207	0.58947	1	166929664	0.00505121	0.2363	384643	insomnia	3.26e-11	0.0798754	OPCs_control_MAEL	44.0167
rs2074037	C	T	-0.832062	-0.0119286	0.820003	16	19725130	0.00646806	0.06515	382897	insomnia	1.04e-10	0.12877	OPCs_control_KNOP1	41.7524
rs2074038	G	T	-1.04983	-0.00697561	0.898413	11	44087989	0.0087457	0.4251	386988	insomnia	1.61e-19	0.116172	Oligodendrocytes_control_ACCS	81.6648
rs2075268	A	G	0.395511	-0.00904074	0.421113	12	14956476	0.00517847	0.08084	384621	insomnia	7.75e-09	0.0685016	Inhibitory_control_C12orf60	33.3362
rs2075465	T	C	0.44823	0.00803217	0.513195	16	4846068	0.00515916	0.1195	380417	insomnia	1.38e-13	0.0605884	Astrocytes_control_ROGDI	54.7296
rs2077066	C	T	-0.518862	0.00598207	0.340653	1	23778362	0.00514551	0.245	386284	insomnia	1.14e-09	0.0852176	Inhibitory_control_TCEA3	37.072
rs2081218	G	A	0.425794	-0.00130085	0.413565	16	29615851	0.00529126	0.8058	369168	insomnia	2.69e-09	0.0715707	Excitatory_control_NPIPB12	35.3939
rs2093691	G	A	-0.406632	0.00895974	0.463899	9	116107087	0.00507576	0.07753	385610	insomnia	3.32e-13	0.0558503	Excitatory_control_BSPRY	53.0093
rs211131	T	C	-0.526274	-0.00995033	0.538879	11	18017517	0.00493615	0.04382	386263	insomnia	7.87e-09	0.0911892	Excitatory_control_TPH1	33.3071
rs2118342	T	G	-0.721313	0.00598207	0.373586	18	28737299	0.00522331	0.2521	385335	insomnia	9.48e-17	0.0867889	Excitatory_control_DSC1	69.0747
rs2124921	G	T	-0.400825	-0.00598207	0.786034	5	96119339	0.00662016	0.3662	386940	insomnia	2.04e-11	0.0597946	Excitatory_control_ERAP1	44.9349
rs213238	T	C	-0.514882	-0.00598207	0.59826	6	28321993	0.00523103	0.2528	385947	insomnia	3.2e-14	0.0678389	Inhibitory_control_ZSCAN31	57.6047
rs213240	T	C	-0.721159	-0.00697561	0.589867	6	28315875	0.00558416	0.2116	386988	insomnia	6.86e-16	0.0893291	Oligodendrocytes_control_ZSCAN31	65.1742
rs2142730	T	C	-0.59612	-0.00796817	0.591466	6	28266149	0.00538971	0.1393	386988	insomnia	3.39e-09	0.10084	Endothelial_control_ZSCAN31	34.9467
rs2147437	A	G	0.335812	-0.0077298	0.431827	9	117134339	0.00519805	0.137	376925	insomnia	1.95e-08	0.059795	OPCs_control_AKNA	31.5401
rs217219	G	A	0.651546	0.00451016	0.844914	11	1996297	0.00705267	0.5225	385579	insomnia	2.51e-12	0.0930452	Excitatory_control_MRPL23	49.0346
rs217223	C	T	0.547872	0.00611868	0.847273	11	2000504	0.00712693	0.3906	386590	insomnia	1.43e-08	0.0966234	Astrocytes_control_MRPL23	32.151
rs217470	C	A	0.426737	-0.00120072	0.303697	1	64031050	0.00566354	0.8321	385747	insomnia	1.24e-09	0.07025	OPCs_control_ITGB3BP	36.9001
rs217470	C	A	0.541028	-0.00120072	0.303697	1	64031050	0.00566354	0.8321	385747	insomnia	5.72e-14	0.071999	Oligodendrocytes_control_ITGB3BP	56.4659
rs2176692	G	A	-0.52959	0.00260339	0.756781	9	111927723	0.00598361	0.6635	382355	insomnia	3.49e-08	0.0960259	Oligodendrocytes_control_FRRS1L	30.416
rs2186280	A	G	0.345877	0.00430927	0.524396	21	34837144	0.00512346	0.4003	386810	insomnia	1.57e-09	0.0572899	Oligodendrocytes_control_TMEM50B	36.4493
rs2187118	A	G	-0.674516	-0.00340579	0.424811	21	47611310	0.00509331	0.5037	385983	insomnia	1.5e-11	0.0999534	Oligodendrocytes_control_FTCD	45.5396
rs2190936	C	T	-0.444647	-0.00598207	0.802522	7	7282445	0.00695166	0.3895	379375	insomnia	5.48e-10	0.0716639	Oligodendrocytes_control_C1GALT1	38.4973
rs2203990	A	G	-0.429642	-0.00210221	0.336956	19	44017925	0.00524561	0.6886	386070	insomnia	9.24e-12	0.0630168	Excitatory_control_PHLDB3	46.4837
rs2214838	A	G	0.478358	-0.00995033	0.518802	7	141480213	0.00521609	0.05644	386982	insomnia	6.23e-10	0.0773488	Inhibitory_control_MGAM	38.247
rs2233921	C	A	-0.369481	0.00240288	0.534282	12	54575800	0.00514383	0.6404	386988	insomnia	9.1e-15	0.0476671	Excitatory_control_SMUG1	60.0823
rs2239760	C	A	-0.400577	-0.00498754	0.599963	12	121163518	0.00515834	0.3336	385981	insomnia	1.13e-12	0.0563109	Inhibitory_control_ACADS	50.6041
rs2240336	C	T	-0.792603	0.012275	0.58075	1	17674402	0.00514215	0.01698	386266	insomnia	1.55e-25	0.0758844	Excitatory_control_PADI4	109.095
rs2241347	C	T	-0.506646	0.00170145	0.817012	2	207647981	0.00673997	0.8007	386846	insomnia	1.93e-11	0.0754925	Excitatory_control_MDH1B	45.0404
rs2249213	G	A	-0.365269	0.0010005	0.532725	5	139937146	0.00515464	0.8461	386266	insomnia	8.96e-13	0.0511183	Oligodendrocytes_control_SRA1	51.0591
rs2253543	T	C	-0.84272	0.0187752	0.94221	10	7473809	0.0120399	0.1189	385745	insomnia	3.17e-08	0.15234	OPCs_control_SFMBT2	30.6011
rs2255364	C	T	-0.653217	-0.00320513	0.195381	12	10531896	0.00637989	0.6154	386938	insomnia	6.64e-09	0.11263	OPCs_control_KLRC2	33.6364
rs2255841	A	G	0.715844	-0.00598207	0.538084	20	59992028	0.00504044	0.2353	384851	insomnia	1.19e-08	0.125575	Oligodendrocytes_control_CDH4	32.4961
rs2260914	A	G	-0.266082	-0.00471108	0.227518	19	58598784	0.00615596	0.4441	382352	insomnia	2.3e-10	0.0419712	Excitatory_control_ZSCAN18	40.191
rs226503	G	T	0.728857	-0.00461061	0.117694	22	45705241	0.00800628	0.5647	385532	insomnia	1.54e-22	0.0746155	Inhibitory_control_FAM118A	95.4172
rs2265908	G	A	-0.599229	0.00598207	0.332194	10	135217956	0.00588507	0.3094	383935	insomnia	1.55e-13	0.0811668	Excitatory_control_SCART1	54.504
rs2269561	T	C	-0.533513	0.0109598	0.779185	16	682566	0.00623578	0.07882	382814	insomnia	9.12e-11	0.0823217	Oligodendrocytes_control_WFIKKN1	42.0012
rs2271663	C	T	-0.513759	-0.001998	0.536024	2	159661077	0.00440319	0.65	379916	insomnia	4.45e-08	0.0938906	OPCs_control_DAPL1	29.9416
rs2274735	T	G	0.319127	0.000100005	0.65617	14	88971758	0.00411261	0.9806	383819	insomnia	2.01e-09	0.0532166	Astrocytes_control_SPATA7	35.9612
rs2275228	T	C	-0.395267	-0.00995033	0.771395	9	33467577	0.00623999	0.1108	374002	insomnia	9.34e-15	0.0510157	Excitatory_control_NOL6	60.0307
rs2276586	A	C	-0.336332	-0.00561574	0.226668	2	120770708	0.00622254	0.3668	381425	insomnia	1.33e-11	0.0497145	Excitatory_control_EPB41L5	45.7691
rs2278043	G	A	0.387512	-0.00796817	0.545951	16	84213965	0.00495202	0.1076	386988	insomnia	8.32e-14	0.0519097	Excitatory_control_TAF1C	55.728
rs2278043	G	A	0.308062	-0.00796817	0.545951	16	84213965	0.00495202	0.1076	386988	insomnia	1.01e-09	0.0504378	Astrocytes_control_TAF1C	37.3046
rs2278043	G	A	0.284952	-0.00796817	0.545951	16	84213965	0.00495202	0.1076	386988	insomnia	6.82e-09	0.04917	Inhibitory_control_TAF1C	33.5848
rs2279228	A	G	-0.605657	-0.00796817	0.516507	10	86004736	0.00514156	0.1212	379914	insomnia	2.56e-10	0.0957844	OPCs_control_RGR	39.9819
rs2282240	C	T	0.345139	0.00310481	0.743846	9	27572634	0.00588837	0.598	380907	insomnia	1.14e-18	0.0391285	Excitatory_control_C9orf72	77.8039
rs2282240	C	T	0.492122	0.00310481	0.743846	9	27572634	0.00588837	0.598	380907	insomnia	1.33e-09	0.0811586	Inhibitory_control_C9orf72	36.7686
rs2284923	C	T	0.250837	-0.00498754	0.528199	6	37348920	0.00535214	0.3514	386988	insomnia	2.47e-10	0.0396354	Inhibitory_control_RNF8	40.0515
rs2284923	C	T	0.246525	-0.00498754	0.528199	6	37348920	0.00535214	0.3514	386988	insomnia	8.04e-10	0.0401238	Excitatory_control_RNF8	37.7499
rs2285089	G	A	-0.335916	0.00380724	0.624302	22	32898291	0.00531267	0.4736	386988	insomnia	1.93e-12	0.0477209	Astrocytes_control_FBXO7	49.5502
rs2285943	G	T	0.631802	-0.00170145	0.498938	7	21582963	0.00500315	0.7338	386988	insomnia	5.79e-10	0.101967	Pericytes_control_DNAH11	38.3918
rs2286569	T	C	0.694588	0.00601807	0.502705	17	61518005	0.00511964	0.2398	386182	insomnia	2.39e-34	0.0568335	Excitatory_control_CYB561	149.364
rs2286988	G	A	0.405775	0.00642057	0.603458	7	76142536	0.00517138	0.2144	383142	insomnia	1.25e-09	0.0668087	Inhibitory_control_ZP3	36.8898
rs2287632	T	C	0.680991	-0.00995033	0.899895	2	207603221	0.00834114	0.2329	386988	insomnia	3.52e-08	0.123521	Excitatory_control_DYTN	30.3948
rs2287997	G	A	-0.550881	0.00833464	0.811727	16	72140553	0.00657309	0.2048	386169	insomnia	4.26e-09	0.093788	OPCs_control_TXNL4B	34.5002
rs2289326	A	C	-0.320742	0.00796817	0.488535	15	40746748	0.00507784	0.1166	384496	insomnia	3.9e-09	0.054471	OPCs_control_CCDC32	34.6722
rs2291039	T	G	0.274745	-0.00380724	0.402561	3	140947647	0.00522839	0.4665	386988	insomnia	1.2e-08	0.0482015	Excitatory_control_PXYLP1	32.4892
rs2291424	A	G	-0.728766	-0.0148886	0.895083	1	245129462	0.00851008	0.0802	381463	insomnia	3.43e-08	0.132072	Excitatory_control_EFCAB2	30.4476
rs229173	T	C	-0.394517	0.00350614	0.664293	14	31018966	0.00553044	0.5261	385279	insomnia	4.21e-08	0.0719674	Excitatory_control_SCFD1	30.051
rs2292538	G	A	0.306351	-0.00299551	0.666075	4	156874833	0.00561197	0.5935	379885	insomnia	4.28e-09	0.0521631	Excitatory_control_CTSO	34.4914
rs2299739	G	A	0.424096	0.00697561	0.324957	21	40757887	0.00515858	0.1763	382215	insomnia	7.01e-19	0.0477864	Excitatory_control_LCA5L	78.7623
rs2303330	A	G	-0.467271	0.0101514	0.744159	2	118698699	0.00585471	0.08294	386841	insomnia	2.16e-08	0.0834575	Excitatory_control_CCDC93	31.3478
rs2303711	T	C	0.493681	-0.000100005	0.307524	5	6602544	0.00659416	0.9879	385683	insomnia	8.48e-13	0.0690154	OPCs_control_NSUN2	51.1681
rs2305064	G	A	-0.322554	-0.0114655	0.461969	17	18770733	0.00509937	0.02455	386527	insomnia	2.14e-09	0.0538759	Oligodendrocytes_control_PRPSAP2	35.8439
rs2305123	A	G	0.534183	0.0137947	0.885796	5	55081694	0.0079428	0.08243	386988	insomnia	1.47e-10	0.0833609	Oligodendrocytes_control_SLC38A9	41.0634
rs2319597	A	G	0.22419	0.001998	0.495414	8	97231679	0.00465849	0.668	385606	insomnia	1.77e-08	0.0397969	Excitatory_control_MTERF3	31.7349
rs2319658	T	C	-0.421947	-0.00598207	0.84649	4	68606934	0.00654743	0.3609	386988	insomnia	8.68e-09	0.0733232	Excitatory_control_TMPRSS11A	33.1156
rs2325262	C	T	-1.18619	0.00598207	0.10781	13	70595686	0.00902208	0.5073	386501	insomnia	1.07e-11	0.174525	OPCs_control_KLHL1	46.1943
rs2335225	G	A	-0.574389	0.0119714	0.587286	19	14942691	0.00517314	0.02066	386988	insomnia	2.01e-08	0.102365	Oligodendrocytes_control_OR7C1	31.4852
rs2339918	A	G	0.423623	0.00601807	0.599643	3	179694371	0.00518636	0.2459	386878	insomnia	2.62e-13	0.0579305	OPCs_control_PEX5L	53.4743
rs2344973	A	G	0.254443	0.00697561	0.212949	17	30643361	0.00611656	0.2541	386988	insomnia	6.57e-13	0.0353982	Excitatory_control_C17orf75	51.6677
rs234713	G	A	0.47703	0.00662188	0.660106	21	44487891	0.00532306	0.2135	385954	insomnia	6.33e-09	0.0821356	Astrocytes_control_CBS	33.7309
rs2351022	C	T	-0.457082	-0.00944446	0.383016	5	153446825	0.00522971	0.07093	386002	insomnia	1.36e-16	0.0552795	Excitatory_control_FAM114A2	68.3692
rs2366913	C	T	0.535822	0.0100503	0.527783	2	179693775	0.0051184	0.04958	386988	insomnia	5.16e-13	0.0742043	Excitatory_control_CCDC141	52.1415
rs2369278	G	A	-0.476703	0.00895974	0.262306	12	508456	0.00600367	0.1356	386518	insomnia	3.49e-10	0.0759634	Oligodendrocytes_control_CCDC77	39.3809
rs2379199	A	C	-0.231876	-0.0124775	0.225461	2	242363564	0.00609951	0.04079	386720	insomnia	9.75e-12	0.0340483	Excitatory_control_FARP2	46.3791
rs2385260	G	A	0.404539	-0.0009995	0.71025	2	220184857	0.0082012	0.903	385595	insomnia	1.63e-08	0.0716348	Excitatory_control_RESP18	31.8913
rs2385291	T	C	0.372916	0.00652122	0.736646	8	124536822	0.00593912	0.2722	372984	insomnia	4.11e-08	0.0679761	Oligodendrocytes_control_FBXO32	30.0961
rs2389793	C	T	0.557939	-0.001998	0.527578	1	85461407	0.00446185	0.6543	384880	insomnia	1.84e-14	0.072823	Excitatory_control_MCOLN2	58.6997
rs2394907	C	T	-0.602618	0.00399202	0.414065	6	31217943	0.00492059	0.4172	386979	insomnia	5.92e-09	0.103559	Microglia_control_POU5F1	33.8614
rs2395943	A	G	0.568699	-0.00040008	0.405073	6	42940673	0.00483846	0.9341	386988	insomnia	3.9e-13	0.0783426	Excitatory_control_GNMT	52.695
rs2398661	C	A	-0.7537	0.00399202	0.471971	7	2393632	0.00517311	0.4403	384793	insomnia	1.22e-21	0.0788713	Excitatory_control_SNX8	91.3186
rs2401751	G	A	0.369503	0.000500125	0.663521	14	88946622	0.00573434	0.9305	386988	insomnia	4.47e-12	0.0533845	Inhibitory_control_SPATA7	47.9077
rs2410612	G	A	-0.349314	-0.00924258	0.321815	8	19681647	0.00548051	0.09171	383704	insomnia	4.53e-10	0.0560278	Excitatory_control_INTS10	38.871
rs2417487	A	G	0.256675	0.00796817	0.461271	9	106887581	0.00534743	0.1362	384885	insomnia	3.11e-10	0.0407852	Excitatory_control_SMC2	39.6061
rs2418157	A	C	-0.482193	0.0082338	0.516556	9	114119984	0.00513309	0.1087	384737	insomnia	5.29e-09	0.0825967	Oligodendrocytes_control_ECPAS	34.0813
rs2422232	G	T	-0.293639	0.00652122	0.752596	2	75900380	0.00591809	0.2705	385659	insomnia	6.67e-12	0.0427765	Excitatory_control_MRPL19	47.1211
rs2440146	T	C	0.714366	0.00598207	0.490852	17	61306995	0.00515315	0.2457	386518	insomnia	6.01e-20	0.0781225	Inhibitory_control_CYB561	83.616
rs2455052	C	A	-0.742888	0.00299551	0.332575	8	97685211	0.00511991	0.5585	382632	insomnia	1.75e-19	0.0822861	OPCs_control_CPQ	81.5068
rs2459509	A	G	0.33392	-0.00994933	0.358016	8	33353328	0.00532799	0.06185	386861	insomnia	2.47e-09	0.0559976	Excitatory_control_FUT10	35.5588
rs2459706	G	A	-0.302009	-0.00742752	0.365003	17	80707443	0.00525206	0.1573	386815	insomnia	1.32e-11	0.0446333	Excitatory_control_FN3K	45.785
rs2459706	G	A	-0.562532	-0.00742752	0.365003	17	80707443	0.00525206	0.1573	386815	insomnia	6.93e-12	0.0820137	Oligodendrocytes_control_FN3K	47.0459
rs2461705	A	G	-0.415581	0.00796817	0.333253	15	45570241	0.00524755	0.1289	383654	insomnia	3.52e-08	0.0753754	Astrocytes_control_SLC28A2	30.3985
rs2465654	C	T	-1.2236	-0.00498754	0.922967	11	120099791	0.0102545	0.6267	384622	insomnia	3.66e-16	0.150147	Astrocytes_control_POU2F3	66.4119
rs2469039	G	A	-0.785327	0.0009995	0.150133	15	76261083	0.0062777	0.8735	386825	insomnia	1.53e-12	0.111051	Inhibitory_control_NRG4	50.01
rs2493145	C	T	-0.65191	0.00561574	0.59559	1	230891248	0.00527326	0.2869	378167	insomnia	2.22e-14	0.0853567	Excitatory_control_CAPN9	58.331
rs2517580	G	A	-0.553398	-0.0009995	0.743992	6	30810056	0.00763897	0.8959	386750	insomnia	4.26e-11	0.0839165	Oligodendrocytes_control_SFTA2	43.4892
rs2531690	A	C	-0.331844	0.0009995	0.318409	10	118667346	0.00871568	0.9087	381795	insomnia	3.62e-09	0.0562372	Excitatory_control_SHTN1	34.8193
rs2532363	G	T	-1.07088	0.0130852	0.784098	17	44333423	0.0062716	0.03694	374709	insomnia	3.67e-15	0.136143	Excitatory_control_LRRC37A2	61.872
rs2532929	A	G	-0.377947	-0.0009995	0.630047	6	30897774	0.00376231	0.7905	386988	insomnia	1.81e-10	0.0592677	Excitatory_control_VARS2	40.6654
rs2532942	C	T	-0.521	0.00060018	0.653654	6	30892322	0.00533931	0.9105	386988	insomnia	9.35e-13	0.0729723	Oligodendrocytes_control_VARS2	50.9752
rs253664	T	C	0.304412	-0.00370686	0.18812	3	138113353	0.00643362	0.5645	385185	insomnia	1.17e-09	0.050037	Excitatory_control_MRAS	37.012
rs2541508	A	G	0.569167	-0.0009995	0.749278	16	10762331	0.00763897	0.8959	386416	insomnia	5.6e-13	0.0789416	Astrocytes_control_EMP2	51.9837
rs2549082	A	G	-0.621142	0.00561574	0.506168	16	70153162	0.00515406	0.2759	379512	insomnia	2.51e-08	0.111469	OPCs_control_CLEC18C	31.0511
rs2577786	C	T	-0.678674	0.0009995	0.430846	2	86143143	0.0088619	0.9102	384533	insomnia	2.1e-16	0.0826025	Oligodendrocytes_control_ST3GAL5	67.505
rs2582687	C	T	-0.348562	0.000100005	0.600589	5	14013695	0.00676183	0.9882	385913	insomnia	2.84e-10	0.0552643	Inhibitory_control_DNAH5	39.7806
rs2585624	C	T	-1.0591	-0.0171462	0.096235	6	69366355	0.00867159	0.04801	381174	insomnia	1.09e-08	0.185282	Oligodendrocytes_control_ADGRB3	32.6743
rs2586460	C	T	0.355662	-0.00511305	0.477418	17	48427191	0.00511717	0.3177	386988	insomnia	1.03e-14	0.0459746	Excitatory_control_XYLT2	59.8468
rs2588152	A	G	0.75149	0.0009995	0.0858456	8	17449710	0.010519	0.9243	381672	insomnia	4.4e-08	0.137286	Excitatory_control_PDGFRL	29.9636
rs2627038	G	A	-0.891838	-0.0129162	0.930857	2	179553917	0.0113351	0.2545	386988	insomnia	1.06e-10	0.138101	Excitatory_control_PRKRA	41.704
rs2668622	G	T	-1.37639	0.0131866	0.785754	17	44352131	0.00634084	0.03756	371210	insomnia	1.77e-27	0.126731	OPCs_control_KANSL1	117.956
rs2668622	G	T	-1.30095	0.0131866	0.785754	17	44352131	0.00634084	0.03756	371210	insomnia	1.16e-23	0.12974	Excitatory_control_KANSL1	100.548
rs2668622	G	T	-1.31779	0.0131866	0.785754	17	44352131	0.00634084	0.03756	371210	insomnia	3.46e-24	0.129887	Astrocytes_control_KANSL1	102.935
rs2695292	G	A	-0.669778	0.001998	0.418401	12	102087290	0.00534025	0.7083	386385	insomnia	1.09e-13	0.0901521	Oligodendrocytes_control_CHPT1	55.1963
rs271143	G	A	0.650079	-0.0009995	0.539981	6	133281687	0.00448115	0.8235	376828	insomnia	3.77e-16	0.0798066	Excitatory_control_LINC00326	66.3521
rs271760	C	T	0.494116	-0.00995033	0.614077	1	234680657	0.00502737	0.04779	385572	insomnia	1.11e-09	0.0811049	Astrocytes_control_LINC01354	37.1163
rs2724360	C	T	-0.298807	-0.0104545	0.219741	1	207943158	0.0061194	0.08756	386315	insomnia	1.39e-09	0.0493323	Oligodendrocytes_control_CD46	36.6876
rs2732708	C	T	-1.16145	0.0132879	0.785961	17	44351387	0.0063087	0.03518	371451	insomnia	5.97e-17	0.138832	Pericytes_control_KANSL1	69.9873
rs2737663	A	G	0.709414	0.000700245	0.529148	1	200057460	0.00544652	0.8977	381532	insomnia	2.31e-10	0.111907	Endothelial_control_NR5A2	40.1871
rs2783119	G	A	-0.435577	0.0082338	0.584296	13	80099118	0.00511565	0.1075	386165	insomnia	1.56e-11	0.0646032	Excitatory_control_LINC01068	45.4594
rs2801943	T	C	0.591307	0.00611868	0.554428	10	42947627	0.00516105	0.2358	384436	insomnia	2.26e-12	0.0842655	Inhibitory_control_LINC00839	49.241
rs2801950	G	A	0.455974	0.00240288	0.643322	10	42926905	0.00523609	0.6463	384403	insomnia	6.6e-13	0.0634406	Excitatory_control_LINC00839	51.659
rs2804602	A	G	-0.96986	-0.0158733	0.889515	10	113819244	0.00862145	0.0656	385247	insomnia	3.57e-08	0.175996	Microglia_control_TECTB	30.3676
rs2830966	T	C	-0.796894	0.013592	0.63931	21	28849553	0.00534948	0.01106	381557	insomnia	2.92e-15	0.100944	Oligodendrocytes_control_ADAMTS5	62.3217
rs2835252	C	A	-0.453174	0.0164343	0.740256	21	37419645	0.00580932	0.00467	386249	insomnia	2.13e-10	0.0713466	Excitatory_control_RUNX1	40.3445
rs2835613	A	G	-0.252639	0.00060018	0.541309	21	38496883	0.00532139	0.9102	386367	insomnia	3.82e-08	0.0459447	Excitatory_control_PIGP	30.2363
rs28365941	T	C	0.703941	0.0232686	0.866054	16	333138	0.00787283	0.003121	369758	insomnia	3.09e-08	0.127146	Oligodendrocytes_control_PDIA2	30.6528
rs2836881	G	T	0.698353	0.00280393	0.737263	21	40466299	0.00584105	0.6312	384824	insomnia	6.43e-09	0.120299	Microglia_control_ETS2	33.6996
rs2837007	C	T	0.449659	0.00796817	0.327002	21	40772484	0.00521322	0.1264	385223	insomnia	3.86e-09	0.0763407	Inhibitory_control_LCA5L	34.694
rs2838513	G	A	0.824917	0.0119286	0.237314	21	45595374	0.00628466	0.05769	378808	insomnia	5.95e-14	0.109854	OPCs_control_PWP2	56.3886
rs2839633	A	G	0.66719	0.00400802	0.55255	21	44510021	0.00517458	0.4386	382325	insomnia	3.24e-13	0.0915949	Microglia_control_U2AF1	53.0588
rs2839633	A	G	0.938889	0.00400802	0.55255	21	44510021	0.00517458	0.4386	382325	insomnia	2.88e-22	0.0967471	Oligodendrocytes_control_U2AF1	94.1786
rs2839633	A	G	0.637501	0.00400802	0.55255	21	44510021	0.00517458	0.4386	382325	insomnia	1.62e-08	0.112858	Endothelial_control_U2AF1	31.9076
rs2839634	T	C	1.00757	0.00330546	0.555118	21	44515685	0.00504091	0.512	386751	insomnia	1.12e-32	0.0846369	Excitatory_control_U2AF1	141.72
rs28447271	G	A	0.627898	-0.00399202	0.510835	8	11827392	0.00485256	0.4107	376393	insomnia	3.08e-08	0.113404	OPCs_control_DEFB134	30.6562
rs28456144	G	A	-0.784823	0.0107577	0.72517	4	88224497	0.00570115	0.05917	384439	insomnia	1.64e-23	0.07854	Excitatory_control_HSD17B13	99.853
rs28456144	G	A	-0.577659	0.0107577	0.72517	4	88224497	0.00570115	0.05917	384439	insomnia	7.59e-12	0.0843777	Inhibitory_control_HSD17B13	46.8692
rs28510888	A	C	0.341877	0.00120072	0.752002	19	58332559	0.00598903	0.8411	383111	insomnia	3.29e-09	0.0577821	Excitatory_control_ZNF552	35.0069
rs28539632	G	A	0.990247	0.0128826	0.934885	13	115064682	0.0108409	0.2347	384107	insomnia	2.35e-08	0.177345	OPCs_control_UPF3A	31.1782
rs2855812	G	T	-0.647868	-0.0109399	0.745035	6	31472720	0.00670574	0.1028	386988	insomnia	1.68e-12	0.0917844	Excitatory_control_MICB	49.8236
rs2863243	T	C	0.803975	-0.00399202	0.637847	2	113989267	0.00569471	0.4833	386897	insomnia	2.56e-15	0.101631	Microglia_control_PAX8	62.5801
rs2863458	T	C	-0.680362	0.0153167	0.7159	1	16389026	0.00567215	0.006927	386988	insomnia	4.73e-11	0.103411	Oligodendrocytes_control_FAM131C	43.2855
rs28637301	G	A	-0.481152	-0.00498754	0.72393	15	51387248	0.00606917	0.4112	386137	insomnia	2.19e-12	0.0685255	Inhibitory_control_MIR4713HG	49.3015
rs28754733	T	C	-0.519449	-0.00399202	0.523654	1	153598094	0.00460594	0.3861	384126	insomnia	5.75e-11	0.0793042	Oligodendrocytes_control_S100A13	42.9036
rs28789132	T	C	0.366356	0.001998	0.317697	1	75207024	0.00470366	0.671	386778	insomnia	8.34e-09	0.0635884	Excitatory_control_CRYZ	33.1934
rs28856360	G	A	-1.37222	0.0062193	0.927267	8	88027372	0.0097935	0.5254	383677	insomnia	1.89e-16	0.16676	Oligodendrocytes_control_CNBD1	67.7122
rs28875243	G	A	0.254144	-0.00944446	0.499546	4	84442509	0.00511422	0.06479	386143	insomnia	9.08e-10	0.041494	Excitatory_control_MRPS18C	37.5137
rs2910324	A	G	0.456262	0.001998	0.412976	5	140570199	0.00562628	0.7225	386988	insomnia	6.68e-11	0.0698967	Excitatory_control_PCDHB7	42.6104
rs2913956	C	A	-0.657801	-0.001998	0.781149	19	8400749	0.00674911	0.7672	386964	insomnia	5.98e-10	0.106253	Inhibitory_control_KANK3	38.3269
rs2918362	A	G	-0.333264	-0.001998	0.638604	19	36811643	0.00535371	0.709	386085	insomnia	7.57e-12	0.048677	Excitatory_control_LINC00665	46.8735
rs2921561	A	G	-0.512876	-0.0158733	0.576644	19	37839871	0.0050808	0.001783	386818	insomnia	1.25e-13	0.0692056	Excitatory_control_LINC01535	54.9214
rs2933249	G	A	-0.802851	-0.00299551	0.818496	3	148416520	0.00593239	0.6136	386231	insomnia	3.77e-08	0.145935	Oligodendrocytes_control_AGTR1	30.2656
rs2954658	C	T	-0.261376	0.00498754	0.488421	8	146017782	0.00482617	0.3014	383566	insomnia	1.97e-12	0.0371465	Excitatory_control_ZNF34	49.5102
rs2956036	G	T	1.07376	-0.0142003	0.165121	8	75083559	0.00688957	0.03929	386249	insomnia	5.84e-14	0.142945	Oligodendrocytes_control_JPH1	56.4251
rs2967532	G	T	-0.655068	-0.00682323	0.419506	19	36940760	0.00517222	0.1871	386988	insomnia	1.06e-11	0.0963514	Excitatory_control_ZNF566	46.2229
rs2972578	A	G	-0.47311	-0.001998	0.776264	19	8396513	0.00627561	0.7502	385579	insomnia	2.26e-11	0.0707402	Excitatory_control_KANK3	44.7293
rs2974855	G	A	-0.409396	-0.0142003	0.151769	16	1919530	0.00714168	0.04677	386975	insomnia	3.2e-15	0.0519351	Excitatory_control_MEIOB	62.1391
rs2978102	A	G	-0.769409	-0.00598207	0.526269	8	101679411	0.00529858	0.2589	383267	insomnia	1.28e-14	0.0998271	Astrocytes_control_SNX31	59.4042
rs3008678	T	G	0.398327	-0.001998	0.567652	9	15937603	0.00437371	0.6478	384607	insomnia	1.68e-10	0.0623579	Excitatory_control_CCDC171	40.8034
rs3009573	T	C	0.428853	-0.00220242	0.297505	1	63904294	0.0054605	0.6867	385287	insomnia	1.68e-08	0.0760163	Inhibitory_control_EFCAB7	31.8275
rs3009573	T	C	0.676541	-0.00220242	0.297505	1	63904294	0.0054605	0.6867	385287	insomnia	4.57e-18	0.0780888	Inhibitory_control_ITGB3BP	75.0603
rs3021337	C	T	-0.474437	-0.00498754	0.695539	12	121163261	0.00599964	0.4058	386952	insomnia	6.08e-18	0.0549692	Excitatory_control_ACADS	74.4934
rs310681	A	G	0.452191	0.00299551	0.306521	19	3149695	0.0059677	0.6157	372945	insomnia	8.6e-11	0.0696773	Excitatory_control_GNA15	42.1172
rs3108598	T	C	-0.290165	0.00430927	0.758877	19	37068235	0.00589003	0.4644	386484	insomnia	1.69e-08	0.0514387	Oligodendrocytes_control_ZNF566	31.8208
rs3110823	A	C	-0.310761	0.0108587	0.827347	7	135357476	0.00677335	0.1089	386716	insomnia	4.86e-08	0.0569542	OPCs_control_STMP1	29.7715
rs3110823	A	C	-0.415554	0.0108587	0.827347	7	135357476	0.00677335	0.1089	386716	insomnia	3.51e-10	0.0662293	Oligodendrocytes_control_STMP1	39.369
rs3110823	A	C	-0.307743	0.0108587	0.827347	7	135357476	0.00677335	0.1089	386716	insomnia	6.89e-09	0.0531184	Astrocytes_control_STMP1	33.565
rs3110823	A	C	-0.484087	0.0108587	0.827347	7	135357476	0.00677335	0.1089	386716	insomnia	9.34e-09	0.0843026	Oligodendrocytes_control_SLC13A4	32.9735
rs3117218	G	A	-0.713432	-0.00697561	0.832597	6	33062715	0.00669429	0.2974	386831	insomnia	1.57e-08	0.126187	Excitatory_control_HLA-DOA	31.9653
rs3124516	A	C	-0.757427	-0.00732678	0.141364	9	73604931	0.00730847	0.3161	386372	insomnia	3.07e-08	0.136787	OPCs_control_TRPM3	30.6616
rs3130524	T	C	-0.38738	0.00120072	0.720337	6	31197729	0.00712111	0.8661	386749	insomnia	3.22e-14	0.0510451	Excitatory_control_CCHCR1	57.5927
rs3131003	G	A	-0.815114	-0.0009995	0.606327	6	31093482	0.00496006	0.8403	386988	insomnia	1.68e-16	0.0988886	Oligodendrocytes_control_PSORS1C1	67.9429
rs3131003	G	A	-0.722522	-0.0009995	0.606327	6	31093482	0.00496006	0.8403	386988	insomnia	1.4e-15	0.0904821	Astrocytes_control_PSORS1C1	63.7643
rs3134253	A	G	0.243447	-0.001998	0.779011	8	104432545	0.00653209	0.7597	386988	insomnia	4.94e-10	0.0391334	Excitatory_control_DCAF13	38.7004
rs3135005	A	G	0.61847	-0.00924258	0.150765	6	32586019	0.00724733	0.2022	386873	insomnia	9.29e-12	0.0907238	Excitatory_control_HLA-DRB5	46.4724
rs3168051	A	G	0.646963	-0.00598207	0.825559	11	35839417	0.0067586	0.3761	386624	insomnia	1.65e-08	0.114607	Inhibitory_control_TRIM44	31.8667
rs3184122	A	G	0.310446	0.000100005	0.625713	12	50570127	0.00681962	0.9883	386289	insomnia	5.34e-11	0.0473157	Oligodendrocytes_control_CERS5	43.049
rs3198697	C	T	-0.613153	0.00541463	0.604639	16	15129940	0.00517157	0.2951	386988	insomnia	8.42e-12	0.0897578	Excitatory_control_NPIPA5	46.6653
rs3198697	C	T	-0.556872	0.00541463	0.604639	16	15129940	0.00517157	0.2951	386988	insomnia	1.03e-10	0.0861656	Astrocytes_control_NPIPA5	41.7678
rs3198697	C	T	-0.651192	0.00541463	0.604639	16	15129940	0.00517157	0.2951	386988	insomnia	1.75e-08	0.115568	Microglia_control_NPIPA5	31.75
rs3198697	C	T	-0.643906	0.00541463	0.604639	16	15129940	0.00517157	0.2951	386988	insomnia	4.77e-10	0.103411	Oligodendrocytes_control_NPIPA5	38.771
rs3198697	C	T	-0.699377	0.00541463	0.604639	16	15129940	0.00517157	0.2951	386988	insomnia	1.06e-11	0.102874	Inhibitory_control_NPIPA5	46.218
rs3213605	T	C	0.624198	0.0009995	0.412875	8	17885091	0.0044	0.8203	386070	insomnia	1.44e-14	0.081144	Inhibitory_control_PCM1	59.1741
rs3218560	G	T	-0.478035	-0.00498754	0.774622	7	152342974	0.00635006	0.4322	384715	insomnia	8.51e-13	0.0668335	Oligodendrocytes_control_XRCC2	51.1601
rs322937	T	C	0.327742	0.00240288	0.605374	17	3446885	0.00523609	0.6463	386988	insomnia	5.26e-09	0.0561317	Excitatory_control_TRPV3	34.0916
rs323631	A	C	1.0999	0.0158733	0.0750719	3	151923600	0.00973538	0.103	377464	insomnia	2.27e-08	0.196767	Microglia_control_AADAC	31.2467
rs335115	C	T	0.368335	-0.00601807	0.292279	2	89027647	0.00563115	0.2852	384607	insomnia	5.77e-14	0.0490244	Excitatory_control_RPIA	56.4498
rs339329	C	T	0.503935	-0.00230265	0.144711	6	117208926	0.00730811	0.7527	385842	insomnia	1.39e-09	0.0832045	Inhibitory_control_FAM162B	36.6822
rs339723	A	G	0.645259	-0.00498754	0.647255	3	42700630	0.00519906	0.3374	382074	insomnia	8.57e-11	0.0994213	Endothelial_control_NKTR	42.1221
rs339802	C	T	-1.40348	-0.00299551	0.891306	13	72734692	0.00771995	0.698	385073	insomnia	8.12e-11	0.215977	Oligodendrocytes_control_DACH1	42.228
rs34018952	T	C	-0.44571	-0.001998	0.703218	3	56421584	0.00664036	0.7635	385358	insomnia	6.62e-11	0.0682662	Oligodendrocytes_control_ERC2	42.6278
rs34029821	A	G	-0.299872	-0.00270365	0.304595	12	53441990	0.00566866	0.6334	386988	insomnia	2.53e-08	0.0538246	Excitatory_control_TNS2	31.039
rs342311	A	G	0.457563	0.00551518	0.821923	4	157810413	0.00680097	0.4174	386988	insomnia	4.92e-08	0.0838931	Inhibitory_control_PDGFC	29.7474
rs34264719	C	T	0.278904	0.00994933	0.656489	17	2122578	0.00531591	0.06126	385766	insomnia	9.69e-12	0.0409487	Excitatory_control_SRR	46.3904
rs34288552	G	A	0.371136	0.00380724	0.634067	2	171661486	0.00537568	0.4788	378701	insomnia	3.48e-08	0.0672913	Astrocytes_control_GAD1	30.4192
rs34322	T	C	-0.490199	0.00299551	0.478593	12	12879570	0.0048809	0.5394	386988	insomnia	6.22e-11	0.0749733	Inhibitory_control_APOLD1	42.7495
rs34324	C	A	-0.433563	0.00511305	0.595776	12	12877926	0.0051607	0.3218	385221	insomnia	4.52e-09	0.0739373	Oligodendrocytes_control_APOLD1	34.3856
rs34372395	A	G	-0.496305	0.00150113	0.765819	1	152167407	0.00616093	0.8075	386753	insomnia	1.67e-09	0.0823428	Excitatory_control_FLG	36.3283
rs344073	C	T	-0.555559	-0.00299551	0.818705	3	156547013	0.00757466	0.6925	385290	insomnia	2.75e-13	0.0760396	Excitatory_control_LEKR1	53.3802
rs34413173	G	A	-0.76096	0.000900405	0.606159	2	10984402	0.00511987	0.8604	386248	insomnia	3.09e-15	0.0964808	Astrocytes_control_LINC01954	62.2074
rs34414056	C	T	-0.398825	-0.00299551	0.785574	20	34030425	0.00610916	0.6239	376232	insomnia	3.87e-08	0.0725558	Oligodendrocytes_control_ERGIC3	30.2149
rs34477097	C	T	-0.524552	0.00040008	0.751071	6	28197186	0.00740284	0.9569	386962	insomnia	4.61e-10	0.0841731	Astrocytes_control_ZSCAN31	38.8357
rs34548796	C	T	-0.874422	0.00180162	0.753213	19	55491695	0.00597466	0.763	379329	insomnia	8.11e-13	0.122139	Inhibitory_control_NLRP2	51.2546
rs34599227	A	G	0.294926	0.00783058	0.674633	11	8782520	0.00542632	0.149	382718	insomnia	4.15e-08	0.0537743	Oligodendrocytes_control_TRIM66	30.08
rs34629886	G	A	1.07167	0.00561574	0.781979	10	79344145	0.00617471	0.3631	383255	insomnia	3.04e-17	0.126902	Microglia_control_KCNMA1	71.3156
rs34642860	C	T	-0.259568	0.0156214	0.692556	20	60895234	0.00554063	0.004811	383382	insomnia	3.56e-08	0.0470979	Excitatory_control_LAMA5	30.3738
rs34654154	C	T	-0.639829	0.00571631	0.929982	19	8035411	0.00988058	0.5629	386804	insomnia	1.62e-08	0.113287	Excitatory_control_TIMM44	31.8984
rs34931250	C	T	-1.09569	0.00611868	0.942224	17	66879927	0.0107797	0.5703	386988	insomnia	3.16e-09	0.184987	Oligodendrocytes_control_ABCA8	35.0823
rs34941506	C	T	-1.81776	-0.0188218	0.933472	14	22418638	0.0102004	0.06501	386546	insomnia	1.34e-09	0.299818	Inhibitory_control_TPPP2	36.7584
rs34972471	G	A	-0.593262	-0.0139029	0.738783	11	48050391	0.00581667	0.01684	386988	insomnia	1.25e-09	0.0976845	OPCs_control_PTPRJ	36.8843
rs35066026	A	G	-0.539669	0.00491204	0.77866	5	179997625	0.00605202	0.417	386561	insomnia	1.02e-08	0.0942323	Excitatory_control_SCGB3A1	32.7986
rs351980	G	A	-1.02449	-0.0198026	0.90441	19	804456	0.0091584	0.0306	385657	insomnia	4.51e-08	0.187299	Endothelial_control_PCSK4	29.9189
rs35244094	C	T	-0.589567	-0.00498754	0.786788	2	29182781	0.00596273	0.4029	380421	insomnia	1.1e-09	0.0967353	OPCs_control_TOGARAM2	37.1447
rs352579	G	A	-0.203164	-0.00796817	0.61296	5	77031486	0.00516641	0.123	386881	insomnia	4.21e-08	0.0370604	Oligodendrocytes_control_TBCA	30.052
rs35335072	C	T	0.368951	-0.00399202	0.644559	19	5708720	0.00530325	0.4516	381543	insomnia	1.84e-11	0.0549194	Excitatory_control_LONP1	45.1321
rs35339677	C	T	-0.83885	0.0177567	0.871097	10	91508353	0.00771508	0.02136	384479	insomnia	2.25e-09	0.140308	OPCs_control_LINC01374	35.7441
rs35352784	G	A	0.524865	0.00040008	0.776946	1	16061966	0.00560539	0.9431	386582	insomnia	9.69e-14	0.070498	Excitatory_control_SLC25A34	55.4295
rs35494857	C	T	0.563998	0.00541463	0.740271	3	113546025	0.00588336	0.3574	379359	insomnia	2.34e-13	0.0769663	Excitatory_control_GRAMD1C	53.6976
rs35497701	C	T	0.258508	0.00697561	0.484585	1	75176928	0.00510852	0.1721	383466	insomnia	4.37e-14	0.0342414	Excitatory_control_TYW3	56.9962
rs35527216	G	A	-0.643004	0.00110061	0.81258	6	56791278	0.00626731	0.8606	385956	insomnia	4.82e-09	0.109853	Microglia_control_BEND6	34.2611
rs35677255	G	A	0.649852	-0.00399202	0.591223	1	110252091	0.00582044	0.4928	379944	insomnia	1.14e-11	0.0957461	Astrocytes_control_GSTM5	46.0667
rs35735316	G	A	-0.965874	-0.00895974	0.917289	20	5489428	0.00954316	0.3478	383261	insomnia	2.82e-09	0.162557	Oligodendrocytes_control_LINC00654	35.3047
rs35745506	G	A	-0.601377	-0.000500125	0.434046	14	59277606	0.00570144	0.9301	381087	insomnia	6.68e-09	0.103707	Oligodendrocytes_control_LINC01500	33.6263
rs35832694	G	A	0.338721	-0.00299551	0.665152	19	5684775	0.00467293	0.5215	377993	insomnia	3.64e-10	0.0540321	Astrocytes_control_LONP1	39.299
rs35845795	C	A	-0.522081	0.00732678	0.833508	3	195652647	0.0068004	0.2813	386988	insomnia	8.72e-09	0.0907348	Inhibitory_control_MUC20	33.1076
rs35857402	A	G	-1.28759	0.00501254	0.929757	19	8049152	0.00993538	0.6139	386790	insomnia	9.45e-20	0.141569	Oligodendrocytes_control_TIMM44	82.7207
rs35878485	T	C	0.409455	-0.00813298	0.41802	17	79911421	0.00522391	0.1195	377488	insomnia	1.73e-09	0.0680061	Excitatory_control_NOTUM	36.2508
rs35898529	G	A	0.891234	0.00732678	0.797053	1	210053096	0.00636514	0.2497	381550	insomnia	6.8e-18	0.103412	Oligodendrocytes_control_SYT14	74.2747
rs35901257	G	A	1.48885	-0.00895974	0.947963	9	111414543	0.0114322	0.4332	378958	insomnia	6.23e-10	0.240739	Endothelial_control_TMEM245	38.2481
rs35971753	T	C	-0.529529	0.0132879	0.844868	11	124875124	0.00710682	0.06152	386863	insomnia	9.63e-09	0.0922994	Oligodendrocytes_control_CCDC15	32.9141
rs36017005	T	G	0.480096	-0.00598207	0.816063	16	78162093	0.00668266	0.3707	384586	insomnia	3.42e-10	0.0764657	Excitatory_control_WWOX	39.4206
rs36017005	T	G	0.510885	-0.00598207	0.816063	16	78162093	0.00668266	0.3707	384586	insomnia	1.42e-08	0.0900903	Inhibitory_control_WWOX	32.158
rs36053285	T	C	0.347063	0.00220242	0.586823	15	101114640	0.00517989	0.6707	386447	insomnia	9.53e-15	0.0448094	Excitatory_control_LINS1	59.99
rs36053285	T	C	0.454269	0.00220242	0.586823	15	101114640	0.00517989	0.6707	386447	insomnia	1.98e-15	0.0571955	Astrocytes_control_LINS1	63.0816
rs36053285	T	C	0.292214	0.00220242	0.586823	15	101114640	0.00517989	0.6707	386447	insomnia	2.01e-10	0.0459429	OPCs_control_LINS1	40.4543
rs36053285	T	C	0.442674	0.00220242	0.586823	15	101114640	0.00517989	0.6707	386447	insomnia	2.66e-12	0.0632859	Oligodendrocytes_control_LINS1	48.9275
rs36053285	T	C	0.344866	0.00220242	0.586823	15	101114640	0.00517989	0.6707	386447	insomnia	5.56e-11	0.0526095	Inhibitory_control_LINS1	42.9709
rs36102500	G	A	0.515042	0.00491204	0.860459	4	6669749	0.00747504	0.5111	385231	insomnia	2.75e-08	0.0926904	Oligodendrocytes_control_LINC02482	30.8757
rs3733897	A	G	-0.564138	-0.0246926	0.865948	5	134223593	0.00741072	0.0008622	386988	insomnia	1.29e-13	0.0761572	OPCs_control_TXNDC15	54.8717
rs3733897	A	G	-0.484423	-0.0246926	0.865948	5	134223593	0.00741072	0.0008622	386988	insomnia	7.63e-11	0.0744381	Inhibitory_control_TXNDC15	42.3506
rs3733897	A	G	-0.796576	-0.0246926	0.865948	5	134223593	0.00741072	0.0008622	386988	insomnia	7.35e-22	0.0829022	Excitatory_control_TXNDC15	92.3256
rs3740561	G	T	-0.331533	0.00461061	0.514438	10	120923339	0.00520257	0.3755	377110	insomnia	2.65e-08	0.0595952	Inhibitory_control_SFXN4	30.9478
rs3742969	A	G	0.480999	-0.0198026	0.858627	15	43621947	0.00778023	0.01092	386936	insomnia	1.55e-15	0.0603316	Excitatory_control_ADAL	63.5622
rs3746983	A	G	-0.834622	0.0111621	0.838468	21	46711940	0.00739318	0.1311	375228	insomnia	4.28e-09	0.14211	Astrocytes_control_LINC00334	34.4932
rs3752955	A	C	0.563092	0.00498754	0.457006	9	77684690	0.00477056	0.2958	386988	insomnia	2.66e-13	0.0770258	Inhibitory_control_NMRK1	53.4425
rs3752955	A	C	0.67568	0.00498754	0.457006	9	77684690	0.00477056	0.2958	386988	insomnia	2.83e-19	0.0752842	Excitatory_control_NMRK1	80.5517
rs3752962	T	C	0.494188	0.00611868	0.684942	17	1939543	0.00549392	0.2654	383474	insomnia	2.01e-09	0.0824054	Astrocytes_control_DPH1	35.9644
rs3753067	C	T	1.04927	0.0185714	0.917427	18	47813835	0.00941128	0.04846	383799	insomnia	4.44e-08	0.191744	Endothelial_control_SMAD4	29.9454
rs3754446	A	C	0.48357	-0.00299551	0.663123	1	110253241	0.00487849	0.5392	382859	insomnia	4.04e-08	0.0880995	Inhibitory_control_GSTM5	30.1281
rs3754861	A	C	-1.11728	-0.0119286	0.92073	2	25393722	0.00976769	0.222	379959	insomnia	4.18e-12	0.161198	Excitatory_control_POMC	48.0403
rs3757481	T	C	0.955989	-0.00399202	0.913104	7	6748260	0.0109246	0.7148	385823	insomnia	1.45e-10	0.149138	Excitatory_control_CCZ1B	41.0896
rs3759453	G	A	0.6922	-0.002002	0.391715	13	107220853	0.00519386	0.6999	383486	insomnia	1.08e-10	0.107227	Inhibitory_control_LINC00443	41.6733
rs3759453	G	A	0.939865	-0.002002	0.391715	13	107220853	0.00519386	0.6999	383486	insomnia	6.11e-21	0.100112	Excitatory_control_LINC00443	88.1376
rs3759453	G	A	0.759158	-0.002002	0.391715	13	107220853	0.00519386	0.6999	383486	insomnia	2.71e-20	0.0822514	Inhibitory_control_LINC00551	85.1879
rs3759453	G	A	0.935433	-0.002002	0.391715	13	107220853	0.00519386	0.6999	383486	insomnia	8.15e-26	0.0890425	Excitatory_control_LINC00551	110.365
rs3764387	G	A	-0.489326	-0.001998	0.792572	17	53920169	0.00761009	0.7929	384853	insomnia	2.15e-09	0.0817408	Excitatory_control_ANKFN1	35.8359
rs3768013	G	A	-0.40946	-0.00995033	0.621907	1	150815411	0.00525496	0.05829	383297	insomnia	2.09e-10	0.0644345	Excitatory_control_CTSS	40.3818
rs3769050	A	G	-0.457348	0.00270365	0.687469	2	238769680	0.00573954	0.6376	373672	insomnia	1.72e-08	0.0811114	Oligodendrocytes_control_RAMP1	31.7928
rs3769818	A	G	0.634822	0.00498754	0.266937	2	202151163	0.00621817	0.4225	386164	insomnia	3.02e-20	0.0688663	Excitatory_control_CASP8	84.9747
rs377297	G	A	0.25712	0.00310481	0.802294	21	15597345	0.00649447	0.6326	386000	insomnia	2.1e-08	0.0458819	Excitatory_control_RBM11	31.4043
rs3778450	T	C	0.368041	0.0036065	0.893065	6	125616907	0.00822141	0.6609	386765	insomnia	1.14e-08	0.06448	Inhibitory_control_HDDC2	32.5794
rs3782424	G	A	1.4443	0.00662188	0.935709	12	114266070	0.0106711	0.5349	383185	insomnia	4.73e-08	0.264471	Microglia_control_RBM19	29.8236
rs3782930	C	A	0.324787	-0.0010005	0.494944	13	50317222	0.00485707	0.8368	386919	insomnia	3.36e-11	0.0489884	Excitatory_control_EBPL	43.9553
rs3791815	G	A	-0.606824	0.0128826	0.751588	2	191219614	0.00590333	0.02909	386698	insomnia	1.01e-20	0.0650068	Excitatory_control_INPP1	87.1379
rs379503	A	C	0.459852	-0.00697561	0.681328	17	74308358	0.0059002	0.2371	386820	insomnia	4.71e-08	0.0841944	Inhibitory_control_PRPSAP1	29.8311
rs3795485	A	G	-0.384384	-0.00598207	0.648662	1	182567739	0.00528524	0.2577	386717	insomnia	2.36e-15	0.0485295	Excitatory_control_RNASEL	62.7364
rs3801803	T	C	0.526097	0.00140098	0.762211	7	26901740	0.00581771	0.8097	385878	insomnia	2.8e-09	0.0885213	Excitatory_control_SKAP2	35.3213
rs3810115	C	A	0.387258	0.00461061	0.527017	19	53400760	0.00504111	0.3604	386988	insomnia	3.85e-14	0.051184	Excitatory_control_ZNF320	57.2442
rs3811348	C	T	-0.244658	-0.00110061	0.427506	16	69782855	0.00515701	0.831	386988	insomnia	7.85e-13	0.0341522	Excitatory_control_NOB1	51.3194
rs3812756	G	A	0.524647	-0.00752827	0.135646	11	12383072	0.00775554	0.3317	386278	insomnia	3.55e-10	0.0836392	Excitatory_control_PARVA	39.3472
rs3813571	G	T	-0.599295	-0.00697561	0.573564	15	78832792	0.00541046	0.1973	383881	insomnia	1.05e-15	0.0747123	Excitatory_control_CHRNA5	64.3424
rs3813769	T	C	0.598432	-0.001998	0.692264	17	16318932	0.00523478	0.7027	370292	insomnia	7.96e-13	0.0835586	Inhibitory_control_TRPV2	51.2916
rs3817776	C	T	-0.367004	-0.00803217	0.443847	6	135256756	0.00518147	0.1211	375697	insomnia	2.42e-08	0.065785	Inhibitory_control_HBS1L	31.1234
rs381809	C	T	-0.684936	0.00440971	0.608297	19	56368765	0.00526519	0.4023	383636	insomnia	2.65e-11	0.102767	Microglia_control_NLRP4	44.4212
rs3818449	A	G	0.388883	-0.00924258	0.413446	1	65844963	0.00523617	0.07754	378081	insomnia	1.38e-11	0.0575272	Astrocytes_control_DNAJC6	45.6974
rs3820823	G	A	-0.464299	-0.00240288	0.387547	2	27164806	0.00513307	0.6397	383264	insomnia	2.79e-08	0.0835932	Astrocytes_control_DPYSL5	30.8499
rs3822217	C	T	0.191443	0.0009995	0.43239	4	25378719	0.00451233	0.8247	381858	insomnia	8.09e-09	0.0331992	Excitatory_control_ANAPC4	33.2526
rs3823842	A	G	-0.603982	-0.00591747	0.304189	7	7604913	0.00561334	0.2918	382913	insomnia	1.14e-15	0.0753955	Oligodendrocytes_control_COL28A1	64.1738
rs382428	A	G	-0.924415	-0.001998	0.804253	4	189374546	0.00641629	0.7555	386712	insomnia	1.55e-09	0.153079	Endothelial_control_LINC01060	36.4672
rs3824627	T	C	0.317449	0.0009995	0.392632	10	113908060	0.00740288	0.8926	385073	insomnia	3.06e-11	0.047782	Excitatory_control_GPAM	44.1386
rs3827149	G	A	-0.302503	-0.0138961	0.383002	20	256866	0.0052053	0.007594	386608	insomnia	2.75e-09	0.0508785	Excitatory_control_C20orf96	35.3501
rs3827393	G	A	0.841605	-0.00330546	0.125135	22	45736153	0.00772672	0.6688	386868	insomnia	5.66e-25	0.0815428	Astrocytes_control_FAM118A	106.524
rs3829606	C	A	-0.417359	-0.0129162	0.923222	17	78022037	0.00957164	0.1772	386456	insomnia	3.22e-08	0.0754824	Inhibitory_control_CCDC40	30.5723
rs3874639	A	G	-0.679596	0.000700245	0.509413	16	1294822	0.00499453	0.8885	384761	insomnia	6.45e-10	0.109985	Astrocytes_control_TPSD1	38.1798
rs3885894	G	A	0.682961	-0.001998	0.775816	19	33438474	0.00690472	0.7723	386041	insomnia	3.3e-26	0.0644884	Excitatory_control_SLC7A9	112.158
rs3904549	G	A	-0.415158	-0.00020002	0.379881	1	95278240	0.00656659	0.9757	382768	insomnia	3.63e-14	0.0548164	Excitatory_control_SLC44A3	57.3595
rs3904965	T	C	-0.297814	-0.00541463	0.447541	1	85465793	0.0051438	0.2925	378259	insomnia	1.37e-08	0.0524622	Excitatory_control_MCOLN3	32.2254
rs393329	T	C	0.800124	0.00796817	0.401968	16	12070422	0.00494075	0.1068	382544	insomnia	7.68e-26	0.0761219	Astrocytes_control_NPIPB2	110.483
rs393329	T	C	0.687585	0.00796817	0.401968	16	12070422	0.00494075	0.1068	382544	insomnia	1.39e-22	0.0703158	Inhibitory_control_NPIPB2	95.6197
rs393329	T	C	0.964364	0.00796817	0.401968	16	12070422	0.00494075	0.1068	382544	insomnia	8.25e-26	0.0918064	Oligodendrocytes_control_NPIPB2	110.341
rs393329	T	C	0.826316	0.00796817	0.401968	16	12070422	0.00494075	0.1068	382544	insomnia	5.12e-31	0.0713484	Excitatory_control_NPIPB2	134.13
rs393329	T	C	0.806807	0.00796817	0.401968	16	12070422	0.00494075	0.1068	382544	insomnia	1.39e-15	0.101022	OPCs_control_NPIPB2	63.7829
rs3935099	T	C	0.377799	-0.00399202	0.535287	17	81016049	0.00500177	0.4248	386988	insomnia	3.89e-08	0.0687409	Oligodendrocytes_control_B3GNTL1	30.2058
rs3935400	G	A	-0.227	0.00995033	0.212396	3	123020221	0.0060654	0.1009	381263	insomnia	2.83e-08	0.0408895	Excitatory_control_SEC22A	30.8195
rs3936325	T	C	-0.645016	0.00591747	0.679387	2	152203035	0.00550606	0.2825	381398	insomnia	3.72e-09	0.109395	Astrocytes_control_TNFAIP6	34.7653
rs3940377	T	C	-0.704376	-0.016841	0.124839	5	54889954	0.00774726	0.02972	383198	insomnia	3.91e-12	0.101489	Oligodendrocytes_control_DDX4	48.1696
rs3946137	A	G	-0.226473	0.00190181	0.649335	22	38988115	0.00531542	0.7205	386442	insomnia	1.45e-08	0.0399574	Excitatory_control_FAM227A	32.1246
rs394784	T	C	-1.05962	-0.001998	0.806764	4	189373753	0.00840038	0.812	386352	insomnia	1.43e-14	0.137727	Pericytes_control_LINC01060	59.1917
rs394784	T	C	-1.04639	-0.001998	0.806764	4	189373753	0.00840038	0.812	386352	insomnia	1.25e-10	0.162659	Excitatory_control_LINC02508	41.3842
rs394784	T	C	-1.24852	-0.001998	0.806764	4	189373753	0.00840038	0.812	386352	insomnia	3.22e-17	0.147956	Oligodendrocytes_control_LINC01060	71.2077
rs3979376	A	G	-0.265025	0.001998	0.480671	2	113225155	0.0065915	0.7618	382874	insomnia	2.2e-09	0.0443016	Inhibitory_control_RGPD8	35.7877
rs3979376	A	G	-0.441435	0.001998	0.480671	2	113225155	0.0065915	0.7618	382874	insomnia	9.56e-09	0.0769265	OPCs_control_RGPD8	32.9292
rs3979376	A	G	-0.279718	0.001998	0.480671	2	113225155	0.0065915	0.7618	382874	insomnia	5.02e-09	0.0478432	Excitatory_control_RGPD8	34.1821
rs4006669	G	A	-0.659031	-0.00895974	0.517345	2	219595160	0.00495638	0.07065	385702	insomnia	7.3e-12	0.0961844	Microglia_control_CYP27A1	46.9464
rs401456	C	T	-1.38923	-0.0009995	0.80824	4	189376507	0.00571228	0.8611	386582	insomnia	1.1e-30	0.120635	Inhibitory_control_LINC01060	132.617
rs4019366	C	A	0.672996	0.00110061	0.604122	12	75836087	0.00537982	0.8379	384783	insomnia	8.1e-20	0.0738596	OPCs_control_GLIPR1L2	83.0256
rs4083004	A	G	-1.14093	-0.00498754	0.725272	11	113582634	0.00588605	0.3968	383256	insomnia	8.19e-24	0.113397	Oligodendrocytes_control_TMPRSS5	101.231
rs4103004	C	T	-0.58038	-0.0119286	0.609238	3	20042834	0.00518042	0.0213	386988	insomnia	1.96e-16	0.0705681	Astrocytes_control_EFHB	67.6407
rs4103004	C	T	-0.837868	-0.0119286	0.609238	3	20042834	0.00518042	0.0213	386988	insomnia	7.53e-20	0.0918745	Oligodendrocytes_control_EFHB	83.169
rs4103004	C	T	-0.629587	-0.0119286	0.609238	3	20042834	0.00518042	0.0213	386988	insomnia	2.04e-13	0.0856999	OPCs_control_EFHB	53.9698
rs4103004	C	T	-0.740979	-0.0119286	0.609238	3	20042834	0.00518042	0.0213	386988	insomnia	4.48e-17	0.0882157	Inhibitory_control_EFHB	70.5539
rs4103004	C	T	-0.85309	-0.0119286	0.609238	3	20042834	0.00518042	0.0213	386988	insomnia	9.62e-24	0.0849233	Excitatory_control_EFHB	100.91
rs4107158	T	C	0.443007	0.00240288	0.792529	12	64066525	0.00632909	0.7042	386339	insomnia	4.38e-08	0.080918	Astrocytes_control_DPY19L2	29.9731
rs4145510	A	G	-0.477178	-0.00299551	0.674084	4	190877710	0.00526784	0.5696	385710	insomnia	1.98e-11	0.0711407	Inhibitory_control_FRG1-DT	44.991
rs41476346	C	T	-0.666126	-0.00399202	0.807885	12	64003597	0.00682488	0.5586	386988	insomnia	1.94e-08	0.118587	Excitatory_control_AVPR1A	31.553
rs4148876	G	A	-1.19353	0.00521357	0.931399	6	32796793	0.009983	0.6015	386988	insomnia	3.86e-13	0.164392	Astrocytes_control_HLA-DOB	52.7119
rs4148876	G	A	-1.19728	0.00521357	0.931399	6	32796793	0.009983	0.6015	386988	insomnia	1.43e-10	0.18672	Oligodendrocytes_control_HLA-DOB	41.1162
rs4148876	G	A	-1.03967	0.00521357	0.931399	6	32796793	0.009983	0.6015	386988	insomnia	2.12e-10	0.163672	OPCs_control_HLA-DOB	40.3501
rs4148876	G	A	-1.61253	0.00521357	0.931399	6	32796793	0.009983	0.6015	386988	insomnia	1.54e-22	0.165081	Excitatory_control_HLA-DOB	95.4157
rs4148876	G	A	-1.1961	0.00521357	0.931399	6	32796793	0.009983	0.6015	386988	insomnia	2.5e-11	0.179235	Inhibitory_control_HLA-DOB	44.5337
rs4149203	G	A	0.447418	0.00642057	0.685857	12	16514921	0.00542841	0.2369	386988	insomnia	2.67e-08	0.0804407	Astrocytes_control_MGST1	30.9368
rs4150942	G	A	-0.32609	-0.00531409	0.313641	8	86115686	0.00546321	0.3307	385831	insomnia	3.74e-12	0.046941	Excitatory_control_CA3	48.2582
rs41748	T	G	0.939466	0.00170145	0.55532	7	116446573	0.0051353	0.7404	381313	insomnia	2.52e-21	0.0990884	Oligodendrocytes_control_MET	89.891
rs4246598	C	A	0.48116	-0.0009995	0.558744	2	88438050	0.00361374	0.7821	381326	insomnia	1.51e-08	0.0850077	Excitatory_control_FABP1	32.0378
rs4267967	T	G	0.469115	0.00571631	0.561491	6	135272477	0.00511654	0.2639	386175	insomnia	1.84e-11	0.0698254	Astrocytes_control_ALDH8A1	45.1369
rs428637	T	G	0.470643	0.00399202	0.459968	13	114927139	0.00573923	0.4867	383423	insomnia	2.23e-12	0.067048	Excitatory_control_CFAP97D2	49.2732
rs4290587	A	G	-0.637166	-0.00080032	0.271383	19	22164646	0.00568266	0.888	386126	insomnia	3.89e-12	0.0917943	Excitatory_control_ZNF257	48.1807
rs4319878	C	T	0.516377	-0.0077298	0.438253	19	21924452	0.00511849	0.131	386109	insomnia	1.89e-18	0.0589237	Excitatory_control_ZNF100	76.7987
rs4334322	G	A	-0.575789	-0.00796817	0.917745	16	74651716	0.010167	0.4332	386278	insomnia	1.25e-08	0.101145	Astrocytes_control_RFWD3	32.4068
rs4343960	A	C	-0.388632	-0.0111621	0.155445	6	31156606	0.0072392	0.1231	386934	insomnia	6.83e-09	0.0670626	Excitatory_control_HCG27	33.5828
rs4355658	A	G	0.574931	0.00498754	0.257601	7	73225692	0.00551494	0.3658	383078	insomnia	1.32e-14	0.0746243	Excitatory_control_METTL27	59.3569
rs4367973	C	A	-0.481323	-0.00440971	0.206436	11	78284545	0.006366	0.4885	383513	insomnia	8.94e-11	0.074233	Excitatory_control_NARS2	42.0416
rs4392103	G	A	-0.452718	-0.00498754	0.730984	16	74735947	0.0054817	0.3629	386988	insomnia	1.43e-09	0.0747995	Oligodendrocytes_control_MLKL	36.6318
rs442130	G	A	-1.21731	-0.0009995	0.807062	4	189373712	0.00498855	0.8412	386988	insomnia	9.42e-26	0.116025	Excitatory_control_LINC01060	110.077
rs442130	G	A	-0.753124	-0.0009995	0.807062	4	189373712	0.00498855	0.8412	386988	insomnia	2.47e-10	0.118994	OPCs_control_LINC01060	40.0575
rs4422957	T	C	0.499241	0.00964638	0.515065	1	74664149	0.0050997	0.05855	386883	insomnia	9.78e-16	0.0621752	Excitatory_control_LRRIQ3	64.4743
rs448829	T	C	0.484022	-0.00299551	0.50571	19	44406321	0.00549996	0.586	386865	insomnia	7.13e-10	0.0785352	Oligodendrocytes_control_ZNF404	37.9841
rs4493716	A	G	-1.7179	-0.00399202	0.917578	5	127967435	0.00836749	0.6333	385839	insomnia	2.74e-24	0.168942	Microglia_control_FBN2	103.401
rs4493716	A	G	-1.02029	-0.00399202	0.917578	5	127967435	0.00836749	0.6333	385839	insomnia	6.17e-13	0.141771	OPCs_control_FBN2	51.7932
rs4543780	C	T	0.674375	-0.0119286	0.713219	1	231174431	0.00596373	0.04548	371136	insomnia	2.95e-12	0.0966127	Astrocytes_control_FAM89A	48.7231
rs4577064	G	A	0.58812	0.0109399	0.43844	15	91647804	0.00494971	0.02709	386755	insomnia	1.04e-10	0.0910195	Oligodendrocytes_control_SV2B	41.7506
rs4587880	C	T	-0.614895	0.00230265	0.638104	14	48286588	0.0053346	0.666	386173	insomnia	3.74e-08	0.111742	Excitatory_control_LINC00648	30.2807
rs4603591	G	A	-0.447631	0.00561574	0.80623	17	1621714	0.0063687	0.3779	386988	insomnia	1.22e-09	0.0736587	Excitatory_control_SERPINF2	36.9311
rs463513	A	G	-0.842321	0.00461061	0.513004	5	118813316	0.005078	0.3639	386035	insomnia	2.34e-16	0.10268	Oligodendrocytes_control_HSD17B4	67.2952
rs4637886	C	T	-0.601365	-0.00662188	0.394683	8	66531232	0.00515789	0.1992	386862	insomnia	6.95e-12	0.0876787	Oligodendrocytes_control_LINC01299	47.0422
rs4646868	A	G	0.51925	0.00521357	0.562991	6	135271946	0.0051652	0.3128	385775	insomnia	5.84e-17	0.0620494	Excitatory_control_ALDH8A1	70.029
rs4646868	A	G	0.3651	0.00521357	0.562991	6	135271946	0.0051652	0.3128	385775	insomnia	9.39e-11	0.0563733	Inhibitory_control_ALDH8A1	41.9448
rs464783	C	T	-0.304899	0.000500125	0.59887	21	42796480	0.00552702	0.9279	384813	insomnia	3.37e-10	0.0485437	Inhibitory_control_MX1	39.45
rs4653301	G	T	0.421679	0.000700245	0.555328	1	38028374	0.00543584	0.8975	386988	insomnia	4.2e-16	0.0518508	Excitatory_control_DNALI1	66.1381
rs4655557	T	C	0.525964	-0.0148886	0.625056	1	66080787	0.00543783	0.006182	384514	insomnia	3.37e-08	0.0952629	Microglia_control_PDE4B	30.4835
rs4671742	T	G	-0.50747	0.00130085	0.586158	2	54211624	0.00504186	0.7964	386344	insomnia	2.87e-08	0.0914484	Oligodendrocytes_control_ACYP2	30.7941
rs4682481	C	T	-0.586993	-0.00598207	0.829813	3	112983855	0.00741805	0.42	385169	insomnia	2.4e-08	0.105194	OPCs_control_BOC	31.1376
rs4685744	C	T	-0.454701	-0.0009995	0.513132	3	4403537	0.00773612	0.8972	385997	insomnia	7.13e-10	0.0737776	Oligodendrocytes_control_SUMF1	37.9842
rs4689029	T	C	0.480993	0.00672255	0.786357	4	6675392	0.00633224	0.2884	384444	insomnia	3.06e-10	0.0763992	Inhibitory_control_LINC02482	39.6369
rs4689699	A	G	-0.564851	0.0178399	0.380983	4	7315187	0.00538418	0.0009217	386988	insomnia	1.01e-10	0.0873614	Oligodendrocytes_control_SORCS2	41.805
rs4702342	T	C	0.448732	-0.0119286	0.780102	5	6386818	0.00603309	0.04802	383335	insomnia	2.19e-10	0.0706956	Excitatory_control_LINC02145	40.2892
rs4704624	T	C	-0.526996	0.00796817	0.439517	5	79480620	0.0049703	0.1089	380246	insomnia	3.79e-08	0.0958098	Endothelial_control_SERINC5	30.2548
rs4705852	A	G	0.607937	-0.00471108	0.349738	5	131602807	0.00537084	0.3804	386731	insomnia	1.12e-15	0.075871	Excitatory_control_PDLIM4	64.2046
rs4714438	G	A	1.08607	-0.00300451	0.216721	6	41199354	0.00617017	0.6263	386947	insomnia	3.15e-20	0.117876	Microglia_control_TREML4	84.8915
rs4736371	A	G	-0.735878	-0.00598207	0.786397	8	143773166	0.00658986	0.364	384323	insomnia	1.55e-11	0.109123	Inhibitory_control_PSCA	45.476
rs4738038	A	G	0.360594	-0.00299551	0.52651	8	70767876	0.00595926	0.6152	384687	insomnia	1.05e-10	0.0558287	Excitatory_control_SLCO5A1	41.7179
rs4738105	A	C	0.58105	-0.00796817	0.505466	8	71958918	0.00540062	0.1401	383944	insomnia	1.91e-14	0.0758896	Oligodendrocytes_control_XKR9	58.6222
rs4746792	C	T	-0.490884	0.0183677	0.868091	10	70585132	0.00769372	0.01697	385835	insomnia	4.44e-11	0.0745033	Inhibitory_control_STOX1	43.4117
rs4761790	G	A	-0.540712	0.00796817	0.244849	12	51749966	0.00587624	0.1751	382226	insomnia	1.82e-08	0.0960635	Oligodendrocytes_control_SLC4A8	31.6822
rs4764815	C	T	0.427061	0.00399202	0.477951	12	102172695	0.00554541	0.4716	384002	insomnia	1.79e-10	0.0669554	Excitatory_control_CHPT1	40.6826
rs4770059	T	C	0.308387	-0.00190181	0.264596	13	21151047	0.00576537	0.7415	385124	insomnia	2.68e-12	0.0440969	Excitatory_control_IFT88	48.9077
rs4770059	T	C	0.503792	-0.00190181	0.264596	13	21151047	0.00576537	0.7415	385124	insomnia	1.81e-08	0.089499	Inhibitory_control_IFT88	31.6859
rs4770161	C	T	0.544838	-0.00299551	0.691608	13	22035585	0.00620558	0.6293	370516	insomnia	8.25e-09	0.0945346	Oligodendrocytes_control_LINC00539	33.2164
rs4776053	C	T	1.06477	-0.001998	0.840019	15	52816195	0.00669578	0.7654	371272	insomnia	1.19e-11	0.157016	Oligodendrocytes_control_MYO5A	45.9859
rs4776774	A	G	-0.550775	-0.0009995	0.941338	15	66572692	0.00928762	0.9143	386988	insomnia	1.49e-11	0.0816127	Excitatory_control_DIS3L	45.5442
rs4778291	T	C	-0.886374	-0.001998	0.706868	15	24478387	0.00665486	0.764	385325	insomnia	7.03e-09	0.153081	Oligodendrocytes_control_PWRN2	33.5267
rs4779931	G	A	0.839033	0.0009995	0.488168	15	32156572	0.0042298	0.8132	385467	insomnia	3.96e-15	0.106799	Oligodendrocytes_control_OTUD7A	61.7198
rs478420	G	A	0.642863	0.00498754	0.375843	8	17792853	0.00486626	0.3054	385050	insomnia	1.91e-11	0.0957664	Excitatory_control_PCM1	45.0621
rs478420	G	A	0.29657	0.00498754	0.375843	8	17792853	0.00486626	0.3054	385050	insomnia	1.38e-11	0.0438712	Oligodendrocytes_control_PCM1	45.6978
rs4784915	C	A	0.549482	0.00299551	0.30392	16	58313806	0.00501751	0.5505	386988	insomnia	4.47e-16	0.0676288	Excitatory_control_GINS3	66.0151
rs4789840	A	G	0.498859	0.00712532	0.63913	17	80707827	0.00531075	0.1797	386851	insomnia	4.13e-12	0.0719565	Astrocytes_control_FN3K	48.0635
rs4790511	A	C	-0.54352	-0.0009995	0.859872	17	3433549	0.0121617	0.9345	386862	insomnia	9.95e-09	0.0948293	Astrocytes_control_SPATA22	32.8508
rs4791878	G	A	0.752986	-0.00697561	0.904866	17	9724916	0.00924639	0.4506	383787	insomnia	5.77e-09	0.129308	Excitatory_control_GLP2R	33.9098
rs4795311	C	T	-0.851948	-0.00697561	0.810769	17	36898393	0.00620459	0.2609	380274	insomnia	3.63e-09	0.144389	Endothelial_control_ARL5C	34.8141
rs4806187	A	G	-0.457205	-0.00299551	0.504357	19	36149761	0.00510822	0.5576	378930	insomnia	2.67e-08	0.0822085	Excitatory_control_UPK1A	30.9306
rs4807216	C	T	-0.703177	-0.0126801	0.149199	19	2248683	0.00751904	0.09172	379694	insomnia	1.76e-08	0.124798	Inhibitory_control_AMH	31.7478
rs4815298	A	G	0.471355	-0.0010005	0.450368	20	2520107	0.00508767	0.8441	385193	insomnia	9.3e-11	0.0727628	Oligodendrocytes_control_ZNF343	41.9639
rs4815298	A	G	0.626872	-0.0010005	0.450368	20	2520107	0.00508767	0.8441	385193	insomnia	1.11e-11	0.0923055	Oligodendrocytes_control_TMC2	46.1214
rs4819388	T	C	0.48287	0.00598207	0.280741	21	45647421	0.00614485	0.3303	386988	insomnia	4.59e-08	0.0883334	Oligodendrocytes_control_ICOSLG	29.8821
rs4835283	G	A	-0.512969	-0.00697561	0.727065	4	147027229	0.00554023	0.208	386543	insomnia	1.36e-09	0.0846422	Excitatory_control_REELD1	36.7289
rs4837329	T	C	-0.351338	-0.00150113	0.31188	9	131655168	0.00554477	0.7866	386022	insomnia	3.06e-11	0.052884	Oligodendrocytes_control_LRRC8A	44.1367
rs4849181	A	G	0.647247	-0.00399202	0.637538	2	113991970	0.0055592	0.4727	386988	insomnia	2.76e-09	0.108869	OPCs_control_PAX8	35.345
rs4862662	G	T	0.273919	0.00340579	0.601143	4	187118662	0.00524477	0.5161	383026	insomnia	1.8e-08	0.0486527	Excitatory_control_CYP4V2	31.698
rs4863780	C	A	-1.17479	-0.00796817	0.868902	4	139230820	0.00726903	0.273	381069	insomnia	1.36e-08	0.20691	Oligodendrocytes_control_LINC00499	32.237
rs4863780	C	A	-0.978614	-0.00796817	0.868902	4	139230820	0.00726903	0.273	381069	insomnia	1.47e-14	0.127255	Astrocytes_control_LINC00499	59.1391
rs4876221	G	A	-0.417264	-0.00299551	0.573184	8	2074056	0.00509657	0.5567	382217	insomnia	7.31e-09	0.0721466	Oligodendrocytes_control_MYOM2	33.4495
rs4880288	T	G	0.379578	0.00430927	0.52019	10	134736076	0.00510935	0.399	386391	insomnia	8.05e-09	0.0658153	Excitatory_control_CFAP46	33.2619
rs4898589	T	C	-0.777985	0.00280393	0.670733	14	48304063	0.00551717	0.6113	385865	insomnia	1.78e-10	0.121953	OPCs_control_LINC00648	40.6968
rs4899469	T	C	0.585205	0.00697561	0.310909	14	73990117	0.00546732	0.202	386988	insomnia	3.23e-10	0.0930768	Excitatory_control_ACOT1	39.5306
rs4908411	C	T	0.714161	-0.00498754	0.691831	1	28704978	0.00511056	0.3291	384660	insomnia	3.78e-19	0.0798546	Excitatory_control_PHACTR4	79.9821
rs4937081	T	G	-0.454411	0.00370686	0.636282	11	125844781	0.00535381	0.4887	382358	insomnia	1.05e-11	0.0668351	Excitatory_control_CDON	46.2261
rs4941677	T	C	-0.327372	0.00299551	0.400091	13	51490196	0.00453379	0.5088	385991	insomnia	6.9e-12	0.0477245	Astrocytes_control_RNASEH2B	47.0543
rs4959187	A	G	-0.561671	0.00130085	0.518087	6	2494871	0.00523622	0.8038	384426	insomnia	2.04e-09	0.0937017	Oligodendrocytes_control_LINC01600	35.931
rs4965320	C	T	0.489326	0.00420884	0.64381	15	101125082	0.00529056	0.4263	383998	insomnia	1.49e-08	0.0864061	Excitatory_control_CERS3	32.0707
rs4970449	A	G	0.603287	0.00240288	0.912582	1	1353632	0.00988813	0.808	383634	insomnia	5.95e-11	0.0921736	Excitatory_control_ANKRD65	42.8385
rs4984673	A	G	-0.477401	0.0106566	0.779001	16	646571	0.00616465	0.08387	386465	insomnia	2.33e-08	0.085472	Astrocytes_control_WFIKKN1	31.1974
rs4984814	A	C	-0.432121	-0.001998	0.543828	16	1385650	0.006242	0.7489	377122	insomnia	2.37e-11	0.0646761	Astrocytes_control_BAIAP3	44.6399
rs4985460	G	A	0.540654	-0.00498754	0.636611	16	69964374	0.00516796	0.3345	384380	insomnia	9.34e-11	0.08347	Oligodendrocytes_control_CLEC18A	41.9546
rs4993865	C	T	-0.327156	-0.00299551	0.61445	4	1204663	0.00486051	0.5377	384406	insomnia	3.74e-08	0.0594525	Excitatory_control_SPON2	30.2809
rs5030489	T	C	-0.734208	-0.00598207	0.930686	11	36534344	0.00954638	0.5309	384058	insomnia	1.79e-08	0.130387	Excitatory_control_RAG2	31.708
rs504280	C	T	-0.381685	0.0010005	0.746725	19	21477379	0.00592027	0.8658	386988	insomnia	1.68e-08	0.0676514	Inhibitory_control_ZNF429	31.8315
rs5050	T	G	-0.532897	-0.00895974	0.836947	1	230849886	0.00689673	0.1939	385873	insomnia	2.41e-08	0.0955072	Oligodendrocytes_control_AGT	31.1325
rs511599	T	C	0.26489	-0.000100005	0.360738	1	53362818	0.0047492	0.9832	386988	insomnia	2.94e-08	0.0477728	Excitatory_control_ECHDC2	30.7447
rs511841	C	T	0.34761	-0.00399202	0.698378	3	120615515	0.00547723	0.4661	383887	insomnia	6.93e-15	0.044647	Excitatory_control_POLQ	60.6178
rs514775	A	G	0.506031	-0.0119286	0.776188	1	108731481	0.00623354	0.05567	386988	insomnia	4.51e-12	0.0731248	Excitatory_control_SLC25A24	47.8877
rs514775	A	G	0.468802	-0.0119286	0.776188	1	108731481	0.00623354	0.05567	386988	insomnia	4.58e-09	0.0799757	Oligodendrocytes_control_SLC25A24	34.3608
rs533233	A	G	0.565127	-0.00995033	0.770216	1	108739104	0.0061027	0.103	386951	insomnia	8.58e-11	0.087076	Astrocytes_control_SLC25A24	42.1206
rs541857	C	T	-0.901175	-0.001998	0.914151	11	120085469	0.00920693	0.8282	386988	insomnia	1.57e-12	0.127501	Oligodendrocytes_control_POU2F3	49.956
rs545721	T	C	0.420817	0.00954541	0.515048	1	74673799	0.00509754	0.06113	386975	insomnia	3.86e-08	0.0765519	Oligodendrocytes_control_LRRIQ3	30.2186
rs553754	T	G	0.470195	-0.0009995	0.514376	18	10529822	0.00403794	0.8045	386085	insomnia	2.67e-17	0.0555772	Excitatory_control_NAPG	71.5752
rs55746644	C	T	-1.33918	0.018164	0.919399	2	177508685	0.00961444	0.05886	380152	insomnia	3.61e-20	0.145578	Excitatory_control_LINC01116	84.6231
rs55746644	C	T	-0.74799	0.018164	0.919399	2	177508685	0.00961444	0.05886	380152	insomnia	3.38e-09	0.126523	Excitatory_control_LINC01117	34.9506
rs55889548	C	T	-1.17995	0.0036065	0.890107	11	18400811	0.00830493	0.6641	386017	insomnia	4.01e-18	0.135963	Inhibitory_control_LDHC	75.3157
rs55889548	C	T	-1.33181	0.0036065	0.890107	11	18400811	0.00830493	0.6641	386017	insomnia	4.69e-30	0.116928	Astrocytes_control_LDHC	129.733
rs55950332	G	A	-0.450744	0.00150113	0.554298	16	87770469	0.00528298	0.7763	381566	insomnia	7.16e-13	0.0628103	OPCs_control_KLHDC4	51.4989
rs55981015	C	T	-0.911907	-0.0129162	0.836306	21	43534075	0.00717364	0.07178	381189	insomnia	1.79e-11	0.135653	Endothelial_control_UMODL1	45.1899
rs56046222	T	G	-0.358464	-0.00150113	0.410322	19	9535127	0.00534183	0.7787	386988	insomnia	1.55e-09	0.05936	Inhibitory_control_ZNF266	36.4672
rs56064946	A	G	-1.13676	0.0236781	0.905324	8	10341838	0.00862794	0.006063	385354	insomnia	6.28e-16	0.140624	Inhibitory_control_PRSS55	65.346
rs56082944	G	A	-1.58175	-0.0188218	0.949896	2	103404617	0.0119485	0.1152	380747	insomnia	3.95e-08	0.287944	OPCs_control_MAP4K4	30.1758
rs56105926	C	T	-0.684021	0.00140098	0.833123	4	187128893	0.00686095	0.8382	386215	insomnia	5.02e-14	0.0908232	Excitatory_control_KLKB1	56.7212
rs56133505	G	A	-0.884213	-0.0143018	0.474869	11	72348039	0.0051305	0.00531	382198	insomnia	2.5e-18	0.101261	Oligodendrocytes_control_PDE2A	76.2475
rs56247749	T	C	-0.783831	0.0292229	0.908317	8	10387646	0.00884228	0.0009501	384684	insomnia	1.07e-08	0.137058	Oligodendrocytes_control_PRSS55	32.7068
rs56259905	A	G	-1.01533	0.0125788	0.839112	12	10691392	0.00690271	0.06841	384640	insomnia	1.29e-12	0.14309	Astrocytes_control_KLRC1	50.3491
rs56277061	T	G	0.508433	-0.00895974	0.857769	13	46965406	0.00688127	0.1929	386760	insomnia	2.85e-11	0.0764102	Excitatory_control_RUBCNL	44.2756
rs56281704	T	C	-0.589398	0.001998	0.373013	2	98293983	0.00503331	0.6914	382420	insomnia	6.55e-15	0.0756334	Inhibitory_control_ANKRD36	60.7281
rs56281704	T	C	-0.740311	0.001998	0.373013	2	98293983	0.00503331	0.6914	382420	insomnia	1.59e-15	0.0928924	Oligodendrocytes_control_ANKRD36	63.5139
rs56281704	T	C	-0.49691	0.001998	0.373013	2	98293983	0.00503331	0.6914	382420	insomnia	8.12e-16	0.0617099	Excitatory_control_ANKRD36	64.8404
rs56315393	A	C	0.669163	0.00440971	0.525108	15	99791339	0.00510503	0.3877	382086	insomnia	5.45e-19	0.0751642	Oligodendrocytes_control_TTC23	79.2577
rs56354362	G	A	-0.375996	0.00190181	0.558041	15	65172801	0.00515906	0.7124	386836	insomnia	3.1e-09	0.0634459	Inhibitory_control_ANKDD1A	35.1204
rs567289	A	G	0.516358	-0.000100005	0.307214	5	6612464	0.00378119	0.9789	385945	insomnia	1.3e-14	0.0670068	Astrocytes_control_NSUN2	59.3833
rs56915211	G	A	-0.629317	-0.00399202	0.762174	19	49891638	0.00603919	0.5086	385781	insomnia	1.32e-08	0.110728	Astrocytes_control_TEAD2	32.3016
rs5754060	G	A	0.419195	0.00300451	0.694662	22	32786540	0.00546681	0.5826	386234	insomnia	6.87e-10	0.0679521	Oligodendrocytes_control_RFPL3S	38.0564
rs575811	T	C	0.865918	-0.00299551	0.584769	6	126162282	0.00514999	0.5608	385537	insomnia	6.72e-17	0.103679	Oligodendrocytes_control_NCOA7	69.7539
rs5758626	G	A	-0.5778	0.0182658	0.784694	22	42572363	0.00618674	0.003153	384815	insomnia	1.89e-11	0.0860555	Excitatory_control_CYP2D6	45.0814
rs57614488	A	G	-0.298328	0.00080032	0.611773	19	36686943	0.00505489	0.8742	384410	insomnia	3.77e-08	0.0542294	Oligodendrocytes_control_LINC00665	30.2634
rs5764704	C	T	1.11044	-0.00471108	0.127003	22	45757987	0.00774681	0.5431	386988	insomnia	1.35e-13	0.150036	Endothelial_control_FAM118A	54.7773
rs5764723	G	A	-0.832159	0.00440971	0.899299	22	45813445	0.00857796	0.6072	384876	insomnia	1.94e-18	0.0949844	Oligodendrocytes_control_FAM118A	76.7553
rs5765272	T	C	0.856631	-0.00300451	0.124899	22	45747901	0.00782759	0.7011	386951	insomnia	2.14e-10	0.134887	Microglia_control_FAM118A	40.332
rs57682978	A	G	0.465001	0.00863719	0.623682	17	71276631	0.00529579	0.1029	382970	insomnia	1.99e-08	0.0828444	Astrocytes_control_CPSF4L	31.5051
rs57708672	G	T	-0.659459	0.00471108	0.632509	17	33571309	0.00523213	0.3679	386276	insomnia	1.93e-12	0.0936787	Microglia_control_SLFN5	49.5557
rs57776888	G	A	0.448019	-0.001998	0.615304	1	181396459	0.00508539	0.6944	386620	insomnia	1.04e-10	0.0693493	OPCs_control_CACNA1E	41.7358
rs57923322	T	G	0.343352	0.00160128	0.755435	17	81009636	0.00585564	0.7845	384237	insomnia	1.34e-11	0.050757	Excitatory_control_B3GNTL1	45.7601
rs58228855	C	T	1.49462	-0.001998	0.92723	1	161671774	0.0114438	0.8614	386988	insomnia	3.51e-08	0.271068	Endothelial_control_UHMK1	30.4024
rs58269521	G	T	-0.441132	-0.0178399	0.885378	17	74663258	0.00830518	0.03171	380762	insomnia	1.68e-08	0.0781904	Astrocytes_control_MXRA7	31.8296
rs584768	G	A	0.33653	-0.00350614	0.478162	19	49213284	0.00514169	0.4953	385679	insomnia	4.21e-09	0.0572734	Excitatory_control_FUT2	34.5256
rs58596451	A	G	-0.612314	0.00752827	0.629548	4	179215237	0.00535664	0.1599	377607	insomnia	3.3e-11	0.0923213	Oligodendrocytes_control_LINC01098	43.989
rs58906298	C	T	0.417226	0.00954541	0.854057	17	42802234	0.00719145	0.1844	386275	insomnia	1.17e-09	0.0685719	Inhibitory_control_DBF4B	37.0212
rs59042914	A	G	-0.471351	0.00853633	0.828953	10	111734169	0.00703692	0.2251	384249	insomnia	2.14e-09	0.0787287	Excitatory_control_ADD3	35.8445
rs59068249	C	T	-1.08763	0.00692392	0.887823	11	82418909	0.0081488	0.3955	386640	insomnia	1.73e-13	0.14762	Oligodendrocytes_control_MIR4300HG	54.2842
rs59310144	G	A	-0.425628	0.00399202	0.40006	13	51491780	0.00562507	0.4779	385974	insomnia	5.22e-13	0.0589559	Inhibitory_control_RNASEH2B	52.1201
rs59535492	T	C	-1.25383	-0.00995033	0.928242	21	45258418	0.0105851	0.3472	384276	insomnia	7.34e-09	0.216813	Microglia_control_ERVH48-1	33.4433
rs59609853	C	T	-0.944376	0.00250313	0.934645	2	239029980	0.010428	0.8103	386623	insomnia	1.61e-09	0.15654	Oligodendrocytes_control_ESPNL	36.3948
rs59788498	G	T	-1.89368	0.00080032	0.935243	12	10052701	0.0111541	0.9428	386024	insomnia	3.26e-09	0.319981	Oligodendrocytes_control_CLEC2A	35.0239
rs5996635	C	T	0.60936	0.00895974	0.16943	22	24270777	0.0069494	0.1973	386982	insomnia	3.1e-08	0.110078	Astrocytes_control_GSTT2B	30.6442
rs6000991	T	C	0.512707	-0.00742752	0.369203	22	38460484	0.00522802	0.1554	386592	insomnia	2.35e-12	0.0731187	Oligodendrocytes_control_PICK1	49.168
rs6002551	G	A	-1.03009	-0.0119286	0.874886	22	42338152	0.00764528	0.1187	386988	insomnia	9.29e-15	0.132939	Excitatory_control_CENPM	60.0401
rs60031276	A	G	0.468571	-0.0009995	0.6363	11	64012910	0.00675669	0.8824	381583	insomnia	9.19e-17	0.0563539	Excitatory_control_CCDC88B	69.136
rs6003823	C	T	0.32765	-0.00299551	0.615993	22	23991420	0.00471474	0.5252	384282	insomnia	2.65e-08	0.0589004	Excitatory_control_DRICH1	30.9446
rs6011700	G	A	0.488598	0.00150113	0.661167	20	61881862	0.00526123	0.7754	381620	insomnia	1.02e-11	0.0718167	OPCs_control_NKAIN4	46.2863
rs6020069	T	C	-0.237133	0.001998	0.456672	20	48438572	0.00572517	0.7271	384119	insomnia	3.83e-09	0.0402523	Excitatory_control_SLC9A8	34.7059
rs6032810	G	A	-0.390424	-0.00400802	0.166634	20	1067571	0.00680718	0.556	386871	insomnia	1.15e-08	0.0684056	Excitatory_control_RSPO4	32.5753
rs6063528	C	A	-0.348963	0.00380724	0.651182	20	49113657	0.00531387	0.4737	382392	insomnia	1.36e-12	0.0492339	Oligodendrocytes_control_PTPN1	50.2376
rs60745231	G	A	0.22615	-0.0148886	0.762308	19	19976988	0.00599634	0.01303	386453	insomnia	4.87e-08	0.0414493	Excitatory_control_ZNF253	29.7687
rs6081964	T	C	-0.280194	-0.0138961	0.42229	20	262570	0.00519377	0.007461	379035	insomnia	2.82e-08	0.0504659	Astrocytes_control_C20orf96	30.8264
rs61008038	T	C	0.701269	0.000900405	0.542483	12	31218038	0.00522573	0.8632	381940	insomnia	4.67e-12	0.10141	Endothelial_control_DDX11	47.8195
rs61008038	T	C	0.718495	0.000900405	0.542483	12	31218038	0.00522573	0.8632	381940	insomnia	6.79e-29	0.0644119	Excitatory_control_DDX11	124.427
rs61008038	T	C	0.474392	0.000900405	0.542483	12	31218038	0.00522573	0.8632	381940	insomnia	1.38e-16	0.0573888	Astrocytes_control_DDX11	68.3312
rs6107015	G	A	-0.371219	0.00541463	0.56124	20	25216764	0.00509181	0.2876	384939	insomnia	4.58e-09	0.0633305	Oligodendrocytes_control_NINL	34.3584
rs61209626	C	T	-0.430423	0.00410843	0.649951	12	10836327	0.00533445	0.4412	381456	insomnia	5.24e-10	0.0692917	Excitatory_control_YBX3	38.5859
rs6125926	T	G	-0.340496	0.00491204	0.682612	20	48781156	0.00547243	0.3694	385940	insomnia	3.89e-09	0.0578225	Excitatory_control_LINC01273	34.676
rs61646033	T	C	-0.952061	0.0179603	0.87475	10	91591477	0.00777575	0.0209	386128	insomnia	1.56e-12	0.134686	OPCs_control_LINC00865	49.967
rs61710250	C	T	0.501534	0.015723	0.7424	2	231808600	0.0058423	0.007119	383095	insomnia	4.6e-08	0.0917537	Excitatory_control_GPR55	29.8781
rs61775934	A	C	-0.374809	-0.00995033	0.725114	1	21775497	0.00548004	0.06941	385598	insomnia	1.15e-09	0.0615772	Excitatory_control_NBPF3	37.0493
rs61820166	C	T	-0.39949	0.0214279	0.911063	1	150556036	0.00930085	0.02123	386573	insomnia	2.82e-09	0.0672324	Oligodendrocytes_control_ARNT	35.3066
rs61834298	A	G	0.755574	0.0153167	0.875376	1	248824244	0.00778844	0.04923	385663	insomnia	3.35e-11	0.113955	Excitatory_control_OR2T10	43.9628
rs61848475	G	A	-0.573686	0.000500125	0.773954	10	28821444	0.00566892	0.9297	386182	insomnia	2.93e-11	0.0862711	Astrocytes_control_LINC02652	44.2199
rs61848475	G	A	-0.692142	0.000500125	0.773954	10	28821444	0.00566892	0.9297	386182	insomnia	3.51e-13	0.0951621	Inhibitory_control_LINC02652	52.9008
rs61854428	G	T	-0.890553	0.020611	0.909021	10	91434899	0.00900913	0.02215	382790	insomnia	7.1e-11	0.136618	Inhibitory_control_LINC00865	42.4919
rs61857132	C	T	-0.507189	-0.0107577	0.156121	10	52505704	0.00727286	0.1391	385502	insomnia	1.6e-11	0.0752701	Excitatory_control_ASAH2	45.4041
rs61869791	G	A	-0.569618	0.0178585	0.874486	10	91595061	0.00778957	0.02187	386479	insomnia	2.84e-12	0.0815458	Excitatory_control_LINC00865	48.7939
rs61972742	A	C	-1.77216	-0.00598207	0.931294	13	95914951	0.0104306	0.5663	386336	insomnia	8.25e-21	0.189406	Oligodendrocytes_control_ABCC4	87.5418
rs61977420	G	A	-1.21994	0.00591747	0.883432	14	70544494	0.00793284	0.4557	386722	insomnia	1.43e-14	0.158563	Oligodendrocytes_control_SLC8A3	59.1929
rs620020	A	G	1.29243	-0.001998	0.922205	7	99421996	0.0090254	0.8248	386467	insomnia	2.9e-09	0.217683	Endothelial_control_EPHB4	35.2507
rs62010162	T	G	0.453985	-0.0119286	0.790842	15	83678413	0.00607627	0.04963	384102	insomnia	3.93e-11	0.0687156	Excitatory_control_C15orf40	43.6488
rs62025697	G	A	0.477565	0.00170145	0.557211	15	99767995	0.00523137	0.745	379016	insomnia	1.68e-10	0.0747596	OPCs_control_TTC23	40.8067
rs62030865	G	A	-0.457167	0.00934352	0.783195	16	616701	0.00638228	0.1432	372467	insomnia	4.75e-12	0.0661328	Excitatory_control_WFIKKN1	47.7876
rs62051918	T	C	-0.428145	-0.00598207	0.806546	16	74613781	0.00673458	0.3744	386022	insomnia	2.59e-11	0.0642091	Excitatory_control_RFWD3	44.462
rs62054434	T	G	-0.933439	0.0145047	0.782917	17	43824382	0.00611754	0.01774	386901	insomnia	2.08e-10	0.146867	Excitatory_control_ARL17A	40.3944
rs62054434	T	G	-0.988826	0.0145047	0.782917	17	43824382	0.00611754	0.01774	386901	insomnia	1.77e-10	0.154995	Inhibitory_control_ARL17A	40.7011
rs62063281	A	G	-0.851027	0.0113643	0.787546	17	44038785	0.00612549	0.06356	386988	insomnia	1.12e-18	0.0964623	Astrocytes_control_LRRC37A2	77.8345
rs62063281	A	G	-1.09839	0.0113643	0.787546	17	44038785	0.00612549	0.06356	386988	insomnia	6.6e-18	0.1274	Endothelial_control_KANSL1	74.3325
rs62063281	A	G	-0.759977	0.0113643	0.787546	17	44038785	0.00612549	0.06356	386988	insomnia	4.71e-14	0.100796	Astrocytes_control_LRRC37A	56.8479
rs62063281	A	G	-1.45665	0.0113643	0.787546	17	44038785	0.00612549	0.06356	386988	insomnia	1.35e-25	0.139292	Inhibitory_control_KANSL1	109.36
rs62078307	G	T	0.353385	-0.0198026	0.674657	17	80090053	0.00538965	0.0002386	386957	insomnia	6.6e-09	0.0609202	Excitatory_control_CCDC57	33.649
rs62079899	G	T	-0.715765	-0.00498754	0.854623	17	53337105	0.00764595	0.5142	383152	insomnia	2.51e-10	0.113141	Oligodendrocytes_control_HLF	40.0221
rs62086795	G	A	-1.08559	-0.0217615	0.920574	17	74757144	0.00979409	0.02629	381825	insomnia	1.23e-17	0.126964	Excitatory_control_LINC02080	73.1088
rs62108332	A	G	-0.416975	-0.00299551	0.818727	19	21710881	0.00765592	0.6956	385289	insomnia	1.64e-12	0.0590455	Excitatory_control_ZNF429	49.8709
rs62138974	C	T	1.64434	0.00240288	0.951165	2	27848068	0.0118942	0.8399	384462	insomnia	2.82e-08	0.296151	Endothelial_control_SLC4A1AP	30.8288
rs62152908	C	T	0.370614	-0.00598207	0.87639	2	97574592	0.00729808	0.4124	384818	insomnia	3.15e-08	0.066985	Excitatory_control_FAM178B	30.6118
rs62167383	C	T	-0.414671	0.00702461	0.820206	2	133100935	0.00663326	0.2896	381010	insomnia	9.16e-10	0.06772	Excitatory_control_GPR39	37.495
rs62214054	C	A	0.469769	0.00380724	0.762597	21	47593728	0.00600248	0.5259	386150	insomnia	5.32e-10	0.0756555	Excitatory_control_FTCD	38.5556
rs62243460	G	T	-0.48627	-0.0009995	0.60939	3	20295849	0.00421371	0.8125	382358	insomnia	3.13e-08	0.0878668	Oligodendrocytes_control_KAT2B	30.6271
rs62265488	A	G	-0.706958	-0.00399202	0.749308	3	93769932	0.00610819	0.5134	386218	insomnia	8.63e-12	0.103544	Oligodendrocytes_control_STX19	46.6165
rs62278541	A	G	-0.474521	0.00762903	0.659113	3	142631909	0.00536336	0.1549	383055	insomnia	5.97e-11	0.0725081	Inhibitory_control_PCOLCE2	42.8289
rs62310103	G	T	-1.39594	-0.00299551	0.638782	4	93504002	0.00599655	0.6174	386252	insomnia	4.17e-27	0.129465	Oligodendrocytes_control_GRID2	116.26
rs62318656	A	C	0.606822	-0.0139029	0.791882	4	76481628	0.00642021	0.03035	382257	insomnia	3.71e-10	0.0968495	Oligodendrocytes_control_ODAPH	39.258
rs62376848	G	A	0.421471	0.00521357	0.738115	5	110562219	0.00589528	0.3765	375358	insomnia	1.1e-09	0.0691582	Astrocytes_control_CAMK4	37.1405
rs62387757	C	T	-0.280783	0.00571631	0.84543	5	157160434	0.00709459	0.4204	379679	insomnia	9.51e-09	0.048923	Excitatory_control_THG1L	32.9395
rs62406491	T	G	-1.37003	0.00521357	0.854533	6	36912399	0.0072521	0.4722	379950	insomnia	5.21e-14	0.182028	Oligodendrocytes_control_PI16	56.6482
rs62456803	G	A	-0.689899	0.00110061	0.944658	7	64264555	0.0110977	0.921	386474	insomnia	3.29e-08	0.124863	Excitatory_control_ZNF273	30.5283
rs62526622	A	C	0.524942	0.0102524	0.8472	8	120864840	0.00727224	0.1586	384195	insomnia	5.61e-10	0.0846548	Astrocytes_control_DSCC1	38.4521
rs62527422	G	A	-0.670503	0.0265493	0.950079	8	92243011	0.0123073	0.03099	385179	insomnia	8.74e-09	0.116536	Excitatory_control_LRRC69	33.1041
rs62546519	G	A	0.521073	-0.00944446	0.427107	9	33481745	0.00516242	0.06733	385523	insomnia	1.24e-08	0.0915029	OPCs_control_ANKRD18B	32.4286
rs62576217	C	T	-0.335109	0.0132879	0.805716	9	135587748	0.00661148	0.04445	369996	insomnia	4.26e-08	0.0611555	Astrocytes_control_DDX31	30.0262
rs625945	T	G	0.316844	-0.00762903	0.300614	6	153340721	0.00551284	0.1664	385124	insomnia	4.89e-08	0.0580795	Oligodendrocytes_control_MTRF1L	29.7608
rs6425534	C	A	-0.356882	0.00498754	0.49857	1	179314623	0.00506534	0.3248	381374	insomnia	2.12e-08	0.0637031	Excitatory_control_AXDND1	31.3855
rs6437069	C	T	-0.288767	0.001998	0.242375	2	233456647	0.00680326	0.769	379763	insomnia	7.11e-10	0.0468506	Oligodendrocytes_control_EIF4E2	37.9896
rs6438652	A	G	-0.264805	0.00498754	0.363996	3	121480375	0.00557865	0.3713	386728	insomnia	2.28e-11	0.0395998	Astrocytes_control_IQCB1	44.7162
rs644396	T	C	0.275536	-0.00399202	0.535243	11	70120501	0.0055996	0.4759	383859	insomnia	1.09e-11	0.0405528	Oligodendrocytes_control_PPFIA1	46.1655
rs6465643	T	C	-0.2481	0.00399202	0.36307	7	77049697	0.00495456	0.4204	385594	insomnia	1.71e-08	0.0440004	Excitatory_control_GSAP	31.7937
rs6480443	T	C	0.366515	-0.00995033	0.606572	10	71925446	0.00517738	0.05462	386487	insomnia	8.04e-17	0.0439959	Excitatory_control_AIFM2	69.3999
rs6487966	T	C	0.772271	0.00110061	0.542908	12	31225230	0.00518192	0.8318	382682	insomnia	1.18e-27	0.0708648	Oligodendrocytes_control_DDX11	118.762
rs6488299	C	T	-1.16664	0.0107577	0.836785	12	10681748	0.00689107	0.1185	385189	insomnia	1.57e-12	0.165056	Oligodendrocytes_control_KLRC1	49.9584
rs6497338	G	A	0.447748	0.00130085	0.505768	16	19274046	0.00533894	0.8075	377271	insomnia	3.82e-09	0.075993	Excitatory_control_CLEC19A	34.7152
rs6497402	A	G	-0.572254	-0.0109399	0.808411	16	19769394	0.00657364	0.09607	386988	insomnia	1.41e-09	0.0945213	Inhibitory_control_KNOP1	36.6537
rs6502892	T	C	0.432115	0.001998	0.279961	17	1617608	0.00506792	0.6934	384664	insomnia	3e-09	0.0728491	Excitatory_control_TLCD2	35.1843
rs6512133	A	G	-0.253497	-0.00742752	0.357198	19	9549789	0.00536216	0.166	381843	insomnia	5.66e-09	0.043508	Astrocytes_control_ZNF266	33.9474
rs6518345	G	A	-0.931331	-0.0119286	0.70124	21	45477100	0.00579472	0.03954	386988	insomnia	6.29e-23	0.0944689	Astrocytes_control_PWP2	97.1918
rs6518345	G	A	-0.992734	-0.0119286	0.70124	21	45477100	0.00579472	0.03954	386988	insomnia	2.35e-23	0.0997037	Microglia_control_PWP2	99.1386
rs6519096	C	T	0.391273	-0.00399202	0.682295	22	38451389	0.00559579	0.4756	386709	insomnia	8.23e-09	0.0678864	Oligodendrocytes_control_BAIAP2L2	33.2197
rs6537742	C	A	0.429619	-0.0129162	0.797502	1	113085197	0.00651238	0.04733	373437	insomnia	4.54e-10	0.0689121	Excitatory_control_MOV10	38.8666
rs654071	A	C	-0.35224	-0.00299551	0.71309	11	68653432	0.00526102	0.5691	386865	insomnia	7.12e-09	0.0608562	Oligodendrocytes_control_IGHMBP2	33.5017
rs6542865	C	T	-0.457964	-0.00974735	0.348932	2	99764521	0.00534061	0.06798	386108	insomnia	1.21e-11	0.0675508	Excitatory_control_TSGA10	45.9623
rs6550200	A	C	0.665393	0.00895974	0.169295	3	33093628	0.0069991	0.2005	383772	insomnia	2.78e-16	0.0813196	Excitatory_control_GLB1	66.9523
rs655530	T	C	-0.19399	-0.00995033	0.673199	12	121022275	0.00553359	0.07215	386858	insomnia	4.01e-09	0.0329704	Excitatory_control_COQ5	34.6187
rs6560900	C	T	-0.416645	0.0112632	0.538857	12	133314927	0.00510558	0.02738	382988	insomnia	6.87e-09	0.0719087	Excitatory_control_P2RX2	33.5714
rs6564267	T	G	-0.256244	-0.00399202	0.647546	16	75603925	0.00511585	0.4352	380839	insomnia	1.46e-10	0.0399806	Excitatory_control_ADAT1	41.078
rs6580729	G	A	-0.702516	-0.00498754	0.637075	12	50547038	0.00491174	0.3099	385214	insomnia	8.32e-17	0.0843703	Inhibitory_control_CERS5	69.332
rs6580729	G	A	-0.71879	-0.00498754	0.637075	12	50547038	0.00491174	0.3099	385214	insomnia	9.56e-22	0.0750183	Excitatory_control_CERS5	91.8055
rs6584592	C	T	0.586709	0.0077298	0.659533	10	106039780	0.00539469	0.1519	386308	insomnia	8.99e-12	0.0860054	Excitatory_control_GSTO2	46.5366
rs6586286	T	G	0.723165	0.00330546	0.55152	21	44511557	0.00511584	0.5182	384464	insomnia	1.31e-11	0.106855	Pericytes_control_U2AF1	45.8024
rs6586286	T	G	0.890816	0.00330546	0.55152	21	44511557	0.00511584	0.5182	384464	insomnia	1.93e-22	0.0914066	OPCs_control_U2AF1	94.9776
rs6589644	C	T	-0.780673	0.0062193	0.69912	11	117959224	0.00551565	0.2595	386693	insomnia	1.07e-16	0.0940909	Microglia_control_SMIM35	68.8404
rs6590203	A	G	-0.230738	0.0138961	0.59212	11	126274197	0.00531487	0.008934	370236	insomnia	4.34e-08	0.0421327	Excitatory_control_ST3GAL4	29.9916
rs6598265	A	C	-0.414935	0.00190181	0.596141	15	100275110	0.00520448	0.7148	382331	insomnia	3.23e-12	0.0595561	Excitatory_control_LYSMD4	48.5409
rs6606826	C	T	-0.450893	-0.00498754	0.842448	15	23066182	0.00683546	0.4656	386988	insomnia	1.78e-08	0.0800554	Oligodendrocytes_control_NIPA1	31.7223
rs66478844	G	A	0.316251	0.00380724	0.850536	4	159450239	0.00724031	0.599	383303	insomnia	2.32e-10	0.0498936	Excitatory_control_ETFDH	40.1768
rs66504353	A	G	-0.782086	-0.00697561	0.64374	8	20037574	0.00514785	0.1754	386471	insomnia	1.91e-11	0.116512	Microglia_control_SLC18A1	45.0571
rs66506464	T	C	0.635427	0.013592	0.787622	17	57024506	0.006185	0.02798	386543	insomnia	1.42e-16	0.0769014	Excitatory_control_RAD51C	68.2752
rs6656401	A	G	1.03053	0.0009995	0.172162	1	207692049	0.0124669	0.9361	386710	insomnia	2.4e-10	0.162709	OPCs_control_CR1	40.1143
rs6656401	A	G	0.897017	0.0009995	0.172162	1	207692049	0.0124669	0.9361	386710	insomnia	1.03e-09	0.146953	Oligodendrocytes_control_CR1	37.2602
rs6656538	C	T	0.689713	-0.00591747	0.496693	1	86456685	0.00511588	0.2474	386799	insomnia	3.57e-09	0.116841	Pericytes_control_COL24A1	34.8452
rs6664332	G	A	-0.675488	-0.001998	0.672449	1	248128929	0.00529646	0.706	386988	insomnia	3.28e-10	0.107474	OPCs_control_OR2L3	39.5031
rs6664332	G	A	-0.711214	-0.001998	0.672449	1	248128929	0.00529646	0.706	386988	insomnia	1.85e-09	0.118321	Excitatory_control_OR2L3	36.1308
rs6664332	G	A	-0.512305	-0.001998	0.672449	1	248128929	0.00529646	0.706	386988	insomnia	3.58e-08	0.0929727	Inhibitory_control_OR2L2	30.3631
rs6664332	G	A	-0.597451	-0.001998	0.672449	1	248128929	0.00529646	0.706	386988	insomnia	5.1e-09	0.102233	Excitatory_control_OR2M2	34.1525
rs6664332	G	A	-0.755805	-0.001998	0.672449	1	248128929	0.00529646	0.706	386988	insomnia	2.26e-09	0.126438	Oligodendrocytes_control_OR2L3	35.7324
rs6664332	G	A	-0.588015	-0.001998	0.672449	1	248128929	0.00529646	0.706	386988	insomnia	1.81e-08	0.104449	Inhibitory_control_OR2L3	31.6932
rs6664332	G	A	-0.728665	-0.001998	0.672449	1	248128929	0.00529646	0.706	386988	insomnia	2.49e-10	0.115154	Oligodendrocytes_control_OR2L13	40.0402
rs6664332	G	A	-0.689945	-0.001998	0.672449	1	248128929	0.00529646	0.706	386988	insomnia	1.46e-10	0.107637	Excitatory_control_OR2L2	41.0873
rs6664332	G	A	-0.779999	-0.001998	0.672449	1	248128929	0.00529646	0.706	386988	insomnia	4.33e-10	0.12497	Oligodendrocytes_control_OR2L5	38.9561
rs6664332	G	A	-0.656688	-0.001998	0.672449	1	248128929	0.00529646	0.706	386988	insomnia	6.22e-11	0.100435	Excitatory_control_OR2M3	42.751
rs6664332	G	A	-0.814014	-0.001998	0.672449	1	248128929	0.00529646	0.706	386988	insomnia	2.78e-12	0.116482	Oligodendrocytes_control_OR2L2	48.8366
rs6664332	G	A	-0.652379	-0.001998	0.672449	1	248128929	0.00529646	0.706	386988	insomnia	1.4e-09	0.10774	Excitatory_control_OR2L5	36.6643
rs6664332	G	A	-0.61682	-0.001998	0.672449	1	248128929	0.00529646	0.706	386988	insomnia	2.84e-09	0.103829	Excitatory_control_OR2AK2	35.2922
rs6664332	G	A	-0.650443	-0.001998	0.672449	1	248128929	0.00529646	0.706	386988	insomnia	2.25e-09	0.108797	Inhibitory_control_OR2M3	35.7427
rs6664332	G	A	-0.592017	-0.001998	0.672449	1	248128929	0.00529646	0.706	386988	insomnia	7.6e-09	0.102475	Inhibitory_control_OR2L5	33.376
rs6664332	G	A	-0.679867	-0.001998	0.672449	1	248128929	0.00529646	0.706	386988	insomnia	3.98e-10	0.108698	Excitatory_control_OR2M4	39.1205
rs66707523	T	C	0.531679	0.00410843	0.800571	18	32572607	0.00640752	0.5214	383796	insomnia	1.16e-08	0.093194	Oligodendrocytes_control_MAPRE2	32.5479
rs6673477	T	C	0.633601	-0.00531409	0.336344	1	46014313	0.00538361	0.3236	384675	insomnia	9.47e-12	0.0929796	Astrocytes_control_CCDC163	46.4362
rs66819621	A	G	-0.52992	-0.0148886	0.836026	4	38819403	0.00681108	0.02882	382061	insomnia	2.95e-08	0.0955773	OPCs_control_TLR1	30.7405
rs6684076	C	T	-1.05674	0.00702461	0.81551	1	217200953	0.00646997	0.2776	384867	insomnia	1.6e-14	0.137611	Microglia_control_ESRRG	58.9693
rs6688261	C	T	0.329409	-0.00299551	0.516602	1	91987034	0.00568729	0.5984	385705	insomnia	3.4e-14	0.0434452	Excitatory_control_CDC7	57.4892
rs6688424	G	A	0.917297	-0.00250313	0.327986	1	45985716	0.00549787	0.6489	386959	insomnia	1.55e-20	0.0987429	Inhibitory_control_CCDC163	86.2996
rs6688424	G	A	0.93513	-0.00250313	0.327986	1	45985716	0.00549787	0.6489	386959	insomnia	1.17e-23	0.093271	Excitatory_control_CCDC163	100.52
rs670012	T	G	0.221532	-0.00895974	0.641391	11	70118251	0.00515754	0.08235	386317	insomnia	1.88e-10	0.0347719	Inhibitory_control_PPFIA1	40.5899
rs6711313	A	G	1.07493	-0.00440971	0.256974	2	183416697	0.00592865	0.457	385034	insomnia	1.71e-17	0.126281	Oligodendrocytes_control_PDE1A	72.4576
rs6712905	T	C	-0.639858	0.0103534	0.731492	2	196952010	0.00584944	0.07673	386369	insomnia	3.07e-09	0.107946	Astrocytes_control_DNAH7	35.1363
rs6713194	C	A	0.444989	0.00399202	0.457473	2	43938558	0.0054357	0.4627	378690	insomnia	4.59e-09	0.0759203	Excitatory_control_PLEKHH2	34.3545
rs671410	G	T	-0.278228	-0.000700245	0.480125	9	136311679	0.00519616	0.8928	377167	insomnia	1.02e-08	0.0485819	Excitatory_control_SURF1	32.7983
rs6716392	T	C	0.441262	-0.00080032	0.21755	2	128107470	0.00627424	0.8985	386003	insomnia	1.83e-11	0.0656743	Excitatory_control_MAP3K2-DT	45.1443
rs6721025	A	G	-0.435527	-0.00873807	0.30361	2	209030572	0.00557912	0.1173	386382	insomnia	3.73e-10	0.0695173	Excitatory_control_CRYGA	39.2504
rs67296984	G	A	-0.46966	-0.00399202	0.74415	17	78002967	0.00598262	0.5046	376122	insomnia	3.6e-13	0.0646044	Excitatory_control_CCDC40	52.8497
rs67332926	T	G	0.87936	0.00320513	0.906551	10	73336879	0.00851767	0.7067	386988	insomnia	2.24e-08	0.157233	Oligodendrocytes_control_CDH23	31.2784
rs67359088	C	T	0.694989	-0.00598207	0.93874	19	9863668	0.0109048	0.5833	386933	insomnia	1.37e-10	0.108275	Excitatory_control_ZNF846	41.1999
rs67362530	G	A	-0.784675	0.00340579	0.883475	10	5043504	0.0079155	0.667	382929	insomnia	7.71e-13	0.109496	Excitatory_control_AKR1C2	51.3554
rs6742869	A	G	-0.424326	-0.00299551	0.786692	2	238499998	0.00664214	0.652	386988	insomnia	1.51e-11	0.0628875	Excitatory_control_RAB17	45.5271
rs67445542	T	C	0.365117	0.0009995	0.386131	3	128330526	0.00420457	0.8121	381017	insomnia	7.87e-11	0.0561456	OPCs_control_RPN1	42.2896
rs67473835	G	A	0.273795	-0.00895974	0.792093	11	134147371	0.00661668	0.1757	382790	insomnia	7.44e-10	0.0444723	Excitatory_control_GLB1L3	37.9029
rs6747623	T	C	-0.595435	-0.00598207	0.501785	2	242704061	0.00482767	0.2153	381818	insomnia	9.25e-11	0.0919066	Inhibitory_control_GAL3ST2	41.9736
rs6747623	T	C	-0.535566	-0.00598207	0.501785	2	242704061	0.00482767	0.2153	381818	insomnia	7.02e-09	0.0924924	Astrocytes_control_GAL3ST2	33.5285
rs6747623	T	C	-0.287735	-0.00598207	0.501785	2	242704061	0.00482767	0.2153	381818	insomnia	1.61e-09	0.0476955	Excitatory_control_D2HGDH	36.394
rs6751833	G	T	0.549062	-0.00299551	0.601075	2	135537898	0.00491235	0.542	386639	insomnia	2.57e-09	0.0921707	Microglia_control_TMEM163	35.486
rs6753219	G	A	-0.961154	0.0129162	0.0843954	2	56242451	0.00963355	0.18	381982	insomnia	4.66e-08	0.175907	Microglia_control_PPP4R3B	29.8551
rs6760918	G	A	-1.29275	0.00722605	0.83893	2	108904340	0.00719311	0.3151	379735	insomnia	1.1e-21	0.135129	Endothelial_control_SULT1C2	91.5229
rs6761921	C	A	0.320655	-0.0009995	0.683359	2	160123080	0.00966099	0.9176	386988	insomnia	2.58e-08	0.057588	Oligodendrocytes_control_WDSUB1	31.0035
rs6771975	T	C	-0.620399	-0.00995033	0.844997	3	185023729	0.00737034	0.177	384275	insomnia	1.9e-08	0.110373	Microglia_control_MAP3K13	31.5949
rs67736652	C	T	0.426156	-0.00895974	0.740003	2	8717551	0.00602055	0.1367	385927	insomnia	2.08e-11	0.0636042	Excitatory_control_LINC00299	44.8916
rs67876192	A	C	0.567198	0.00521357	0.677227	19	21753089	0.00542456	0.3365	383206	insomnia	4.15e-08	0.103424	Astrocytes_control_ZNF208	30.0767
rs6791987	C	T	0.479931	0.00340579	0.56491	3	56579538	0.00519762	0.5123	383181	insomnia	1.87e-08	0.0853383	Inhibitory_control_CCDC66	31.6278
rs68100606	G	A	0.406678	0.0142003	0.775029	17	56500898	0.00608185	0.01955	385401	insomnia	1.23e-09	0.0669325	Inhibitory_control_RAD51C	36.917
rs6816696	T	C	0.300303	0.00995033	0.376555	4	17574197	0.00523737	0.05745	386286	insomnia	2.66e-08	0.053987	Oligodendrocytes_control_FAM184B	30.9415
rs6819295	G	A	-0.669671	0.00531409	0.73897	4	103355489	0.00584792	0.3635	381006	insomnia	1.05e-09	0.10974	Inhibitory_control_SLC39A8	37.2388
rs683191	G	T	1.04047	0.00190181	0.914794	11	65792566	0.00872239	0.8274	386988	insomnia	1.71e-08	0.184509	Pericytes_control_CCDC85B	31.7995
rs686666	G	A	-0.372328	-0.00598207	0.714889	15	44161550	0.00573487	0.2969	385053	insomnia	1.29e-09	0.0613475	Excitatory_control_STRC	36.8348
rs688092	A	G	0.25672	-0.00732678	0.300498	6	153343952	0.00553504	0.1856	386537	insomnia	1.08e-12	0.0360586	Excitatory_control_MTRF1L	50.6874
rs6881772	T	C	-0.615008	-0.00895974	0.840037	5	149720807	0.00719765	0.2132	383576	insomnia	1.06e-09	0.100815	Oligodendrocytes_control_ARSI	37.2146
rs6882565	G	A	-0.325745	-0.00796817	0.709245	5	81356421	0.00541696	0.1413	386832	insomnia	3.43e-09	0.0551212	OPCs_control_ATG10	34.9234
rs6892351	G	T	-0.487085	-0.00498754	0.796004	5	110175795	0.00702145	0.4775	386416	insomnia	1.61e-09	0.0807317	Oligodendrocytes_control_TMEM232	36.4017
rs6900726	G	A	0.392866	-0.00984834	0.282558	6	42531650	0.00564607	0.08111	385344	insomnia	1.71e-12	0.0556776	Excitatory_control_PRPH2	49.7884
rs6902901	C	T	-1.82217	-0.0129162	0.940527	6	29983415	0.0112494	0.2509	386981	insomnia	2.19e-09	0.304548	Inhibitory_control_TRIM31	35.7987
rs6925315	G	A	-0.340752	-0.001998	0.747365	6	116969946	0.0060376	0.7407	386766	insomnia	3.4e-10	0.0542669	Excitatory_control_FAM162B	39.4281
rs6926283	T	C	-0.374598	0.00299551	0.391357	6	170734451	0.00508754	0.556	382419	insomnia	6.25e-09	0.0644744	Excitatory_control_FAM120B	33.7564
rs6931381	G	A	1.2828	0.0108587	0.942526	6	56115226	0.0113498	0.3387	384909	insomnia	1.18e-08	0.224945	Microglia_control_DST	32.5213
rs6945543	G	T	-0.532481	-0.0139029	0.940065	7	117822747	0.0104433	0.1831	386892	insomnia	3.35e-08	0.0964318	Astrocytes_control_CTTNBP2	30.4908
rs6967414	G	A	0.572162	-0.00697561	0.877651	7	6749758	0.00775521	0.3684	385884	insomnia	2.96e-08	0.103206	Inhibitory_control_CCZ1B	30.7345
rs6990544	C	T	-0.84551	0.00299551	0.386826	8	104137318	0.00586122	0.6093	373184	insomnia	1.41e-11	0.125125	Oligodendrocytes_control_BAALC	45.6613
rs6991838	G	A	-0.542182	-0.00390762	0.435837	8	66470962	0.00509937	0.4435	381560	insomnia	2.13e-12	0.0771717	Oligodendrocytes_control_LINC00251	49.3598
rs7011538	T	C	-1.15497	0.0242927	0.90846	8	10367091	0.00884049	0.005998	386500	insomnia	9.4e-21	0.123624	Excitatory_control_PRSS55	87.2847
rs7025771	C	T	-0.879605	0.00598207	0.394574	9	12760762	0.00512809	0.2434	384629	insomnia	4.76e-23	0.0889687	Oligodendrocytes_control_LURAP1L	97.7465
rs7031991	A	G	0.519623	-0.00672255	0.431659	9	38661416	0.00518047	0.1944	382472	insomnia	2.08e-08	0.0927053	Oligodendrocytes_control_CNTNAP3	31.4171
rs7031991	A	G	0.67934	-0.00672255	0.431659	9	38661416	0.00518047	0.1944	382472	insomnia	3.56e-08	0.123263	Oligodendrocytes_control_ANKRD18A	30.3744
rs7045986	T	C	0.833403	-0.0100503	0.234274	9	139654777	0.00611197	0.1001	386359	insomnia	2.21e-11	0.124548	Inhibitory_control_LCN15	44.7748
rs705508	G	A	-0.398091	-0.00692392	0.301701	1	64075150	0.00550643	0.2086	381640	insomnia	2.72e-08	0.0716144	Inhibitory_control_ALG6	30.9004
rs7067	C	T	1.02734	0.0119286	0.313206	21	45550959	0.00555517	0.03177	382907	insomnia	2.41e-27	0.0948368	Excitatory_control_PWP2	117.348
rs7078507	A	G	-0.707527	0.0009995	0.401995	10	77140864	0.00577527	0.8626	385440	insomnia	2.98e-09	0.119256	OPCs_control_LRMDA	35.1984
rs707951	T	C	0.825662	-0.00863719	0.328194	6	32609813	0.00563603	0.1254	383793	insomnia	1.06e-12	0.115917	Endothelial_control_HLA-DQB1	50.7354
rs7099030	T	C	0.427965	0.00793137	0.658796	10	106038347	0.00534854	0.1381	386813	insomnia	3.82e-11	0.0647372	Inhibitory_control_GSTO2	43.7027
rs709934	A	G	-0.455065	-0.00110061	0.436055	2	233733352	0.00491744	0.8229	386709	insomnia	4.48e-12	0.0657487	Astrocytes_control_SNORC	47.904
rs7105521	A	G	0.887074	-0.00642057	0.150126	11	82126783	0.00717551	0.3709	386887	insomnia	5.37e-09	0.152019	Microglia_control_MIR4300HG	34.0504
rs7109626	G	A	-1.39838	-0.00399202	0.932206	11	127451064	0.0110012	0.7167	382475	insomnia	2.08e-10	0.220035	Endothelial_control_LINC02098	40.3894
rs7124022	G	A	0.281364	-0.0125788	0.242724	11	244964	0.00594544	0.03437	382932	insomnia	4.08e-08	0.0512751	Inhibitory_control_PSMD13	30.1109
rs7130452	C	T	-0.795966	-0.0009995	0.629678	11	111056615	0.00431686	0.8169	386988	insomnia	1.79e-12	0.112902	Oligodendrocytes_control_LINC02550	49.7033
rs7131272	C	T	-0.570965	-0.00598207	0.608711	11	34869548	0.00481295	0.2139	385389	insomnia	4.69e-11	0.0867671	Microglia_control_APIP	43.3021
rs713759	G	A	0.733974	0.00491204	0.515059	22	45791143	0.00507921	0.3335	386460	insomnia	2.03e-21	0.0772315	Excitatory_control_RIBC2	90.3177
rs71460757	C	T	-0.883117	0.0113643	0.886372	12	127549465	0.00807453	0.1593	386753	insomnia	1.37e-08	0.15557	Microglia_control_LINC02405	32.2243
rs7147308	C	T	0.353999	-0.0109399	0.707502	14	23497629	0.00545829	0.04504	386191	insomnia	3.08e-11	0.0532911	Excitatory_control_PSMB5	44.1262
rs71490861	A	G	-0.70118	-0.00796817	0.926116	10	63422876	0.00942358	0.3978	386695	insomnia	1.67e-08	0.124258	Inhibitory_control_CABCOCO1	31.8426
rs71512326	T	C	0.585291	0.0009995	0.285236	8	133493283	0.00784352	0.8986	386102	insomnia	3.14e-08	0.105775	Oligodendrocytes_control_KCNQ3	30.618
rs7155652	A	G	-0.480463	0.00498754	0.334073	14	105057102	0.00516475	0.3342	382565	insomnia	2.95e-08	0.0866579	Oligodendrocytes_control_TMEM179	30.74
rs7176492	C	T	0.598027	-0.00299551	0.786158	15	79051264	0.0070338	0.6702	386346	insomnia	5.19e-11	0.0910873	OPCs_control_ADAMTS7	43.1048
rs7178124	T	C	0.420012	0.00320513	0.526057	15	99773270	0.00511111	0.5306	379398	insomnia	8.63e-10	0.0684858	Inhibitory_control_TTC23	37.6117
rs7187976	A	G	-0.66478	-0.0129162	0.807841	16	19708196	0.00693561	0.06256	381426	insomnia	5.51e-13	0.092177	Excitatory_control_KNOP1	52.0129
rs7187976	A	G	-0.979216	-0.0129162	0.807841	16	19708196	0.00693561	0.06256	381426	insomnia	4.12e-17	0.116441	Astrocytes_control_KNOP1	70.7202
rs7194	G	A	0.733608	-0.0145047	0.392629	6	32412480	0.00557466	0.009271	386988	insomnia	1.06e-13	0.0987001	Excitatory_control_HLA-DRB1	55.245
rs719454	C	T	-0.511415	0.00895974	0.458047	6	147949628	0.00520428	0.08514	384955	insomnia	2.3e-08	0.0915259	Astrocytes_control_SAMD5	31.2219
rs720846	T	C	0.521636	-0.00020002	0.309115	5	6607916	0.00620877	0.9743	386836	insomnia	5.24e-25	0.0505049	Excitatory_control_NSUN2	106.676
rs7208811	C	A	-0.329346	-0.00833464	0.367102	17	3416555	0.00537658	0.1211	375790	insomnia	4.09e-08	0.060026	Excitatory_control_OR3A2	30.104
rs7219200	T	C	-0.858108	-0.000900405	0.316609	17	67132022	0.00534406	0.8662	382474	insomnia	4.15e-13	0.118353	Oligodendrocytes_control_ABCA6	52.5685
rs7226265	A	G	-0.831047	-0.00598207	0.802964	17	6556022	0.00660361	0.365	381807	insomnia	5.3e-18	0.0961106	Oligodendrocytes_control_C17orf100	74.7668
rs7228400	C	T	-0.700414	0.00793137	0.698577	18	57484054	0.00557861	0.1551	383458	insomnia	4.11e-11	0.10612	Astrocytes_control_CCBE1	43.5628
rs723593	G	A	0.281361	0.00697561	0.113405	20	48535617	0.00768434	0.364	386067	insomnia	1.06e-09	0.0461242	Excitatory_control_RNF114	37.2111
rs7246400	G	A	0.347185	-0.00813298	0.437668	19	21909948	0.0051701	0.1157	385102	insomnia	1.18e-10	0.0538931	OPCs_control_ZNF100	41.5006
rs7246400	G	A	0.285482	-0.00813298	0.437668	19	21909948	0.0051701	0.1157	385102	insomnia	5.3e-09	0.0489055	Astrocytes_control_ZNF100	34.0754
rs7249727	A	G	-0.298511	0.00299551	0.241536	19	2346730	0.00552946	0.588	381674	insomnia	1.95e-08	0.0531541	Excitatory_control_LSM7	31.5388
rs7251665	A	G	-0.775105	-0.00299551	0.824709	19	15682328	0.00771727	0.6979	382372	insomnia	3.25e-08	0.140235	Excitatory_control_CYP4F2	30.5497
rs7252903	C	T	0.886293	-0.00350614	0.261974	19	16075619	0.00582889	0.5475	378111	insomnia	1.82e-16	0.107649	Oligodendrocytes_control_CYP4F11	67.7856
rs72609904	A	G	-0.903306	0.00914166	0.801535	8	22952046	0.00637225	0.1514	385435	insomnia	2.22e-10	0.142361	Astrocytes_control_TNFRSF10C	40.2613
rs7261820	G	A	-0.467066	-0.00995033	0.85582	20	34160840	0.00737375	0.1772	386391	insomnia	5.97e-10	0.0754416	Astrocytes_control_ERGIC3	38.3297
rs72627906	C	A	-0.393175	0.0129839	0.751576	2	191220338	0.00592259	0.02836	386757	insomnia	3.07e-08	0.0710033	Oligodendrocytes_control_INPP1	30.663
rs72704039	T	C	-0.573076	-0.0119286	0.863113	4	186122172	0.00748476	0.111	386572	insomnia	2.37e-10	0.0904543	Excitatory_control_SNX25	40.139
rs72711334	C	T	-0.380472	0.016841	0.887439	5	264699	0.00800784	0.03546	385159	insomnia	2.63e-10	0.0602103	Excitatory_control_CCDC127	39.9304
rs72725665	G	A	-1.03806	0.000500125	0.917449	8	139505282	0.00874616	0.9544	382307	insomnia	1.25e-14	0.134629	Oligodendrocytes_control_FAM135B	59.4519
rs72779968	G	A	-0.991084	-0.0119286	0.957738	5	101758952	0.0130071	0.3591	386670	insomnia	1.4e-08	0.174697	Oligodendrocytes_control_SLCO6A1	32.1847
rs72781532	A	G	-0.581435	0.00974735	0.888688	5	97197360	0.00823233	0.2364	386895	insomnia	7.13e-09	0.100457	Excitatory_control_LINC02234	33.4998
rs7282749	G	A	0.929554	0.00350614	0.555178	21	44517072	0.00516683	0.4974	386740	insomnia	1.02e-26	0.0868744	Inhibitory_control_U2AF1	114.49
rs7285172	A	G	0.840964	-0.00260339	0.123637	22	45726345	0.00765832	0.7339	386988	insomnia	4.06e-10	0.134518	Pericytes_control_FAM118A	39.0836
rs72908798	C	T	1.35742	0.0121738	0.951063	2	174553633	0.0115721	0.2928	386988	insomnia	2.59e-08	0.243828	Endothelial_control_OLA1	30.9929
rs72942432	T	C	-1.20435	0.00631993	0.887766	11	82410915	0.00814692	0.4379	385647	insomnia	2.8e-11	0.18092	OPCs_control_MIR4300HG	44.3132
rs7294351	G	A	0.354339	-0.0009995	0.509974	12	21608519	0.00456527	0.8267	386980	insomnia	1.98e-08	0.0631209	Oligodendrocytes_control_PYROXD1	31.513
rs72965847	G	A	-0.355396	0.000900405	0.82338	18	71982961	0.00688826	0.896	378515	insomnia	5.68e-09	0.0610017	Inhibitory_control_CYB5A	33.9424
rs72966993	T	C	-0.381752	-0.00895974	0.882488	11	93289678	0.00775587	0.248	386750	insomnia	2.25e-08	0.0682768	Inhibitory_control_SMCO4	31.262
rs7300410	T	G	0.586633	0.000900405	0.897833	12	30898946	0.00832778	0.9139	386383	insomnia	1.81e-08	0.104212	Excitatory_control_CAPRIN2	31.6882
rs73022837	G	T	-0.314639	0.00652122	0.809896	11	130717406	0.00652917	0.3179	383213	insomnia	1.82e-08	0.0559023	Inhibitory_control_SNX19	31.6785
rs73035571	A	G	0.462429	-0.00299551	0.779963	19	33457942	0.00694419	0.6662	384882	insomnia	3.96e-10	0.0739235	Inhibitory_control_SLC7A9	39.1314
rs7304605	A	C	0.782157	0.0119286	0.311361	12	96813866	0.00545217	0.02868	383914	insomnia	1.6e-09	0.12963	Oligodendrocytes_control_CFAP54	36.4062
rs73054418	A	G	-0.870374	0.0123763	0.838985	12	10697264	0.00686891	0.07158	386181	insomnia	3.11e-08	0.157238	Excitatory_control_KLRC2	30.6404
rs73054470	C	T	-1.02331	0.00974735	0.836343	12	10706978	0.00683099	0.1536	386871	insomnia	2.52e-16	0.124882	Excitatory_control_KLRC1	67.1445
rs73066206	A	G	0.373813	-0.0188218	0.732135	19	58995042	0.00562631	0.0008219	384989	insomnia	3.2e-08	0.0675956	Inhibitory_control_ZNF446	30.5825
rs73079894	C	A	-0.416688	-0.00895974	0.544526	3	56591508	0.00525557	0.08823	386342	insomnia	3.2e-09	0.0703739	Excitatory_control_CCDC66	35.0588
rs73156375	G	T	-0.552841	-0.0009995	0.885447	3	93781615	0.00696545	0.8859	386988	insomnia	2.58e-13	0.0755777	Excitatory_control_DHFR2	53.5073
rs73156375	G	T	-0.548031	-0.0009995	0.885447	3	93781615	0.00696545	0.8859	386988	insomnia	2.59e-08	0.0984361	Oligodendrocytes_control_DHFR2	30.9957
rs73165152	G	A	-0.816261	-0.00995033	0.881372	22	42340397	0.00769879	0.1962	385580	insomnia	9.51e-14	0.109602	Excitatory_control_TNFRSF13C	55.4658
rs7320988	C	T	0.545703	0.00310481	0.556729	13	44413523	0.0052019	0.5506	386646	insomnia	2.53e-08	0.0979521	Endothelial_control_CCDC122	31.0374
rs7322730	C	T	0.548908	0.00250313	0.721376	13	25514928	0.0056847	0.6597	385908	insomnia	5.71e-11	0.0837885	Excitatory_control_CENPJ	42.9171
rs732661	T	C	0.301855	-0.00601807	0.475649	17	48408836	0.00516004	0.2435	378769	insomnia	1.47e-08	0.0532862	Astrocytes_control_XYLT2	32.0898
rs73302946	C	T	-1.17599	-0.00299551	0.921362	17	36478345	0.0111341	0.7879	382709	insomnia	6.21e-09	0.202374	Astrocytes_control_TBC1D3D	33.7671
rs73302946	C	T	-1.28825	-0.00299551	0.921362	17	36478345	0.0111341	0.7879	382709	insomnia	1.45e-09	0.212948	Inhibitory_control_TBC1D3D	36.598
rs73302946	C	T	-1.21101	-0.00299551	0.921362	17	36478345	0.0111341	0.7879	382709	insomnia	1.2e-10	0.188073	Oligodendrocytes_control_TBC1D3D	41.4608
rs73302946	C	T	-1.3987	-0.00299551	0.921362	17	36478345	0.0111341	0.7879	382709	insomnia	8.02e-11	0.215179	Excitatory_control_TBC1D3D	42.252
rs733759	A	G	0.513937	0.00498754	0.415119	8	125743773	0.00503299	0.3217	382185	insomnia	4.94e-12	0.0744058	Inhibitory_control_LINC00964	47.7097
rs73409643	C	T	-1.1747	0.00150113	0.914191	6	32949229	0.0109338	0.8908	386935	insomnia	6.29e-24	0.116454	Astrocytes_control_HLA-DMA	101.752
rs73494602	G	A	-1.15926	0.00893984	0.950771	19	9264401	0.0119342	0.4538	386988	insomnia	3.89e-10	0.185228	Oligodendrocytes_control_OR7D2	39.1696
rs73494602	G	A	-1.32617	0.00893984	0.950771	19	9264401	0.0119342	0.4538	386988	insomnia	3.11e-11	0.199682	Inhibitory_control_OR7D2	44.1084
rs73494602	G	A	-1.49551	0.00893984	0.950771	19	9264401	0.0119342	0.4538	386988	insomnia	2.34e-15	0.188778	Excitatory_control_OR7D2	62.759
rs73581685	C	T	0.420013	0.00803217	0.815369	6	125623247	0.00667282	0.2287	385538	insomnia	1.61e-12	0.0594522	Excitatory_control_HDDC2	49.9101
rs73586087	G	A	-1.00244	0.00190181	0.922841	19	52925539	0.0100562	0.85	384349	insomnia	2.56e-19	0.111553	Oligodendrocytes_control_ZNF534	80.7524
rs7381988	G	A	-0.639013	-0.00742752	0.173461	6	31246703	0.00683252	0.277	386988	insomnia	5.59e-09	0.109632	OPCs_control_HLA-B	33.974
rs739292	G	A	-0.302223	-0.00895974	0.519631	22	42368857	0.00526696	0.08892	380986	insomnia	4.8e-08	0.0553678	Inhibitory_control_WBP2NL	29.7947
rs7396562	C	A	0.65038	-0.0148886	0.828948	11	408352	0.00694703	0.0321	386447	insomnia	3.67e-08	0.118121	Inhibitory_control_SIGIRR	30.3168
rs7396866	G	A	-0.797186	0.00190181	0.719886	11	74698928	0.00570581	0.7389	384326	insomnia	1.78e-23	0.0798409	OPCs_control_XRRA1	99.6939
rs7415462	G	A	-0.399904	0.00399202	0.433747	1	11783295	0.00488904	0.4142	385941	insomnia	5.01e-09	0.0683953	Oligodendrocytes_control_AGTRAP	34.1868
rs74175081	G	A	-0.916182	-0.00498754	0.779837	2	29180123	0.00574971	0.3857	384113	insomnia	3.01e-22	0.0944517	Inhibitory_control_TOGARAM2	94.0901
rs74197901	G	A	-0.417	-0.00498754	0.93117	16	69359720	0.0112809	0.6584	385976	insomnia	1.04e-08	0.0728576	Oligodendrocytes_control_UTP4	32.7583
rs74270771	A	G	-0.310363	-0.00995033	0.854821	2	242563565	0.00700884	0.1557	386077	insomnia	1.66e-09	0.0514868	Excitatory_control_THAP4	36.337
rs7439780	C	T	-1.15953	-0.00299551	0.891713	4	304649	0.00758245	0.6928	384266	insomnia	9.87e-22	0.121059	Excitatory_control_ZNF732	91.7426
rs74432199	T	C	-1.38815	0.000500125	0.854406	2	169221824	0.00797561	0.95	372943	insomnia	4.08e-18	0.15999	Oligodendrocytes_control_CERS6	75.2814
rs74583214	C	T	-0.589794	-0.001998	0.901981	16	90110798	0.00727523	0.7836	378578	insomnia	2.17e-08	0.105366	OPCs_control_GAS8	31.3329
rs74823816	G	A	1.22923	-0.00299551	0.857287	4	179127155	0.00845428	0.7231	386230	insomnia	6.31e-13	0.17088	Oligodendrocytes_control_LINC01099	51.7473
rs74889410	C	A	0.371691	0.00571631	0.868704	13	101299070	0.00744169	0.4424	386527	insomnia	2.6e-10	0.0588023	Excitatory_control_TMTC4	39.9554
rs74900798	G	A	-1.16444	0.002002	0.917132	11	3253267	0.00906978	0.8253	386988	insomnia	1.09e-09	0.191025	Microglia_control_ART5	37.1579
rs7491	C	T	-0.468224	0.00672255	0.530325	1	25895238	0.00514103	0.191	385203	insomnia	8.5e-14	0.0627447	Oligodendrocytes_control_LDLRAP1	55.687
rs74976642	G	A	-0.788834	0.00652122	0.901816	12	26998022	0.00842478	0.4389	386770	insomnia	1.57e-15	0.0989618	Inhibitory_control_ITPR2	63.5385
rs74990069	T	G	0.303574	0.00631993	0.629259	7	134695069	0.00527068	0.2305	384928	insomnia	8.82e-10	0.0495271	Excitatory_control_AGBL3	37.5704
rs7502594	T	C	-0.939494	0.00420884	0.748975	17	260182	0.00595356	0.4796	386433	insomnia	3.88e-23	0.0948306	Oligodendrocytes_control_C17orf97	98.1503
rs7503725	G	T	-0.687705	0.00350614	0.748794	17	260142	0.0059173	0.5535	386550	insomnia	1.96e-09	0.114589	OPCs_control_C17orf97	36.0176
rs7503725	G	T	-0.363532	0.00350614	0.748794	17	260142	0.0059173	0.5535	386550	insomnia	2e-10	0.057149	Excitatory_control_C17orf97	40.464
rs75044290	A	C	-1.14152	0.00501254	0.861779	4	175055483	0.00752614	0.5054	382713	insomnia	6.71e-10	0.184925	Oligodendrocytes_control_LINC02268	38.1042
rs75046124	C	T	-0.68901	-0.00796817	0.935597	7	6585477	0.0110513	0.4709	380547	insomnia	6.03e-09	0.118472	Excitatory_control_GRID2IP	33.8236
rs75101533	A	C	-1.9848	0.00501254	0.878379	11	4757764	0.00768975	0.5145	386455	insomnia	1.88e-21	0.208679	Inhibitory_control_OR51E2	90.4646
rs75159543	C	T	-0.533336	0.0105555	0.874029	15	40665228	0.00754481	0.1618	386760	insomnia	6.62e-11	0.0816859	Excitatory_control_KNSTRN	42.6292
rs75315518	C	T	-1.0768	0.00140098	0.88118	4	175027910	0.00808915	0.8625	380317	insomnia	9.99e-11	0.166505	Inhibitory_control_LINC02268	41.8232
rs7545044	A	G	-0.393179	-0.00230265	0.301562	1	63856651	0.00560306	0.6811	379978	insomnia	1.08e-14	0.0508684	Excitatory_control_ALG6	59.7425
rs7547458	T	C	-0.271226	-0.0009995	0.643194	1	212871886	0.00555071	0.8571	383201	insomnia	2.71e-08	0.0487873	Excitatory_control_BATF3	30.9065
rs7550296	T	C	0.642626	0.001998	0.161338	1	55696884	0.00721029	0.7817	381260	insomnia	5.98e-13	0.0892427	Excitatory_control_MIR4422HG	51.8527
rs7551881	G	T	0.332436	0.00501254	0.649567	1	166955312	0.00529814	0.3441	382014	insomnia	1.06e-11	0.0488966	Excitatory_control_MAEL	46.2232
rs7551910	G	T	-0.911117	0.00160128	0.821086	1	212599978	0.00652015	0.806	378732	insomnia	6.75e-10	0.147623	Oligodendrocytes_control_LINC02608	38.0925
rs7555744	T	C	-1.10082	0.00954541	0.950931	1	101843527	0.012022	0.4272	384651	insomnia	4.95e-08	0.201871	Microglia_control_DPH5	29.7363
rs755693	G	A	1.0797	-0.00380724	0.261564	19	16071452	0.00585879	0.5158	384581	insomnia	2.08e-17	0.127186	OPCs_control_CYP4F11	72.0649
rs7571686	G	A	0.504811	-0.00350614	0.483971	2	29202192	0.0051132	0.4929	376852	insomnia	1.34e-11	0.0746273	Astrocytes_control_TOGARAM2	45.7575
rs7576826	C	T	-0.37401	-0.0119286	0.50584	2	11723021	0.0052641	0.02345	385056	insomnia	1.16e-12	0.0526028	Excitatory_control_GREB1	50.5533
rs75774622	G	A	-0.871329	-0.00498754	0.908037	19	52927865	0.00815486	0.5408	386988	insomnia	1.49e-15	0.109214	Astrocytes_control_ZNF534	63.6512
rs75810319	G	T	1.13808	-0.00399202	0.898541	1	20807073	0.00930174	0.6678	386988	insomnia	1.12e-18	0.128995	Oligodendrocytes_control_CAMK2N1	77.8399
rs7581224	G	T	0.754207	0.00240288	0.597321	2	84709215	0.00518881	0.6433	386988	insomnia	5.81e-19	0.084784	Oligodendrocytes_control_DNAH6	79.1321
rs7589901	A	C	0.583206	-0.00299551	0.642325	2	113993344	0.00533544	0.5745	382525	insomnia	8.18e-09	0.101168	Excitatory_control_PAX8	33.2319
rs7591556	A	C	-1.27692	0.0191828	0.937925	2	69313884	0.0106026	0.07041	386988	insomnia	4.35e-08	0.23318	Microglia_control_ASPRV1	29.9875
rs7593335	A	G	0.449468	-0.00873807	0.286465	2	88878133	0.00558977	0.118	386716	insomnia	2.42e-09	0.0753307	Excitatory_control_EIF2AK3	35.6003
rs7594155	C	T	1.05798	0.0111621	0.875003	2	33173465	0.00778059	0.1514	381947	insomnia	8.66e-12	0.154965	Oligodendrocytes_control_LTBP1	46.6112
rs7598246	T	C	0.448418	-0.00210221	0.425053	2	172866359	0.00524917	0.6888	383069	insomnia	2.25e-08	0.080194	Inhibitory_control_DYNC1I2	31.2667
rs760402	G	A	-0.434489	0.00299551	0.309027	9	35686376	0.00567952	0.5979	383471	insomnia	1.75e-14	0.0566667	Inhibitory_control_TPM2	58.7899
rs7608524	G	A	-0.442138	0.00080032	0.630477	2	242710236	0.00526584	0.8792	378997	insomnia	1.13e-10	0.0685612	Excitatory_control_GAL3ST2	41.5871
rs7613073	T	G	0.55695	0.001998	0.363534	3	128388503	0.00616823	0.746	385409	insomnia	1.37e-16	0.0673681	Inhibitory_control_RPN1	68.3476
rs7613073	T	G	0.678058	0.001998	0.363534	3	128388503	0.00616823	0.746	385409	insomnia	3.81e-22	0.0700753	Excitatory_control_RPN1	93.6276
rs76143776	G	A	0.338535	-0.001998	0.875522	6	42013949	0.00660294	0.7622	384911	insomnia	2.02e-08	0.0603447	Inhibitory_control_CCND3	31.4723
rs76148294	G	A	-1.47393	0.013592	0.932765	5	96492324	0.0102051	0.1829	384003	insomnia	2.45e-11	0.220764	Microglia_control_LINC02234	44.5755
rs7620707	G	A	0.415477	-0.00598207	0.543631	3	127183627	0.00553732	0.28	381896	insomnia	1.51e-09	0.068749	Excitatory_control_LINC02016	36.5226
rs76216796	T	C	-0.773271	0.002002	0.884238	10	5000917	0.00781831	0.7979	385577	insomnia	1.12e-10	0.1199	OPCs_control_AKR1C2	41.5934
rs76265950	A	C	-0.489703	-0.001998	0.900394	16	90085139	0.00747337	0.7892	385684	insomnia	9.47e-10	0.0800407	Astrocytes_control_GAS8	37.432
rs76512444	G	A	-1.17519	0.0272684	0.915767	8	66904111	0.00906086	0.002617	386157	insomnia	2.01e-10	0.184751	Oligodendrocytes_control_PDE7A	40.4617
rs7653818	C	T	-0.700105	-0.001998	0.545018	3	57051720	0.00593307	0.7363	384781	insomnia	2.19e-16	0.085265	Oligodendrocytes_control_ARHGEF3	67.4193
rs76567987	A	G	-1.2759	-0.0009995	0.84173	12	31037655	0.0119244	0.9332	378073	insomnia	1.15e-18	0.144675	Oligodendrocytes_control_TSPAN11	77.7764
rs7657916	G	A	-0.330998	-0.00299551	0.674137	4	190871996	0.00513034	0.5593	386511	insomnia	1.39e-09	0.0546461	Astrocytes_control_FRG1-DT	36.6887
rs7661312	T	G	-0.512538	-0.0109399	0.508608	4	89201007	0.00518998	0.03504	385639	insomnia	1.36e-12	0.0723095	Inhibitory_control_PPM1K-DT	50.2415
rs7661312	T	G	-0.857421	-0.0109399	0.508608	4	89201007	0.00518998	0.03504	385639	insomnia	3.71e-17	0.101811	Oligodendrocytes_control_PPM1K-DT	70.9245
rs7661412	G	A	-1.19289	-0.00399202	0.893141	4	298772	0.00764397	0.6015	384783	insomnia	3.34e-09	0.201713	Endothelial_control_ZNF732	34.9729
rs76644806	C	T	-0.5813	-0.0109399	0.730059	1	179561154	0.00592625	0.06489	386550	insomnia	1.18e-14	0.0753156	Excitatory_control_TDRD5	59.5704
rs76644806	C	T	-0.69347	-0.0109399	0.730059	1	179561154	0.00592625	0.06489	386550	insomnia	2.12e-15	0.0874021	Inhibitory_control_TDRD5	62.9524
rs76760541	A	G	-0.310552	-0.0139029	0.830303	13	114191214	0.00689726	0.04383	386472	insomnia	1.73e-09	0.0515758	Inhibitory_control_TMCO3	36.2557
rs76789733	A	G	0.551909	0.00742752	0.897166	5	140282931	0.0083339	0.3728	385629	insomnia	3.92e-08	0.100446	Excitatory_control_PCDHA9	30.1903
rs76792388	A	C	0.941796	0.00732678	0.899638	5	179629485	0.00861563	0.3951	381285	insomnia	5.45e-10	0.151767	Microglia_control_RASGEF1C	38.5087
rs76832527	G	A	-0.508938	-0.00598207	0.816815	2	242157241	0.00634786	0.346	369515	insomnia	2.38e-09	0.0852522	Excitatory_control_ANO7	35.6385
rs7695249	C	T	-0.478605	0.00400802	0.699518	4	103302846	0.00561313	0.4752	386742	insomnia	6.76e-13	0.0666193	Excitatory_control_SLC39A8	51.6125
rs77013239	T	G	0.540049	0.00631993	0.767142	13	43616214	0.00598766	0.2912	384368	insomnia	1.06e-16	0.0650808	Inhibitory_control_DNAJC15	68.859
rs77046488	A	G	0.556084	-0.001998	0.796525	16	99353	0.00535757	0.7092	385075	insomnia	2.91e-08	0.100254	Inhibitory_control_WASIR2	30.7665
rs77216612	A	G	0.456125	0.00140098	0.717729	12	12877983	0.00562758	0.8034	385821	insomnia	2.82e-09	0.0767694	OPCs_control_APOLD1	35.3014
rs77270200	G	A	-1.06418	-0.00399202	0.900572	16	90093075	0.00883818	0.6515	386988	insomnia	1.37e-15	0.133217	Inhibitory_control_GAS8	63.8129
rs77435420	C	T	-0.682895	-0.0009995	0.842918	1	55600352	0.00589219	0.8653	385341	insomnia	4.87e-09	0.116706	Inhibitory_control_MIR4422HG	34.2388
rs774471	A	G	0.250417	0.0174514	0.809082	8	82724429	0.0064628	0.006928	386243	insomnia	3.76e-08	0.0455176	Excitatory_control_SNX16	30.2669
rs7745687	G	A	-0.621654	0.00863719	0.723508	6	36354213	0.00569112	0.1291	384581	insomnia	1.3e-12	0.0876312	Excitatory_control_ETV7	50.3246
rs7754582	G	A	0.430623	0.00796817	0.478993	6	46067273	0.00516641	0.123	385285	insomnia	7.02e-14	0.0575121	Excitatory_control_CLIC5	56.063
rs775467	C	T	-0.733965	-0.0009995	0.882529	12	70100725	0.0059322	0.8662	384734	insomnia	3.08e-10	0.116602	Excitatory_control_MYRFL	39.6219
rs7759046	G	A	0.383427	0.00240288	0.718552	6	106831766	0.00569358	0.673	381202	insomnia	1.12e-09	0.0629466	Inhibitory_control_CRYBG1	37.104
rs77603042	A	G	-0.995331	-0.0009995	0.900375	16	90083239	0.005844	0.8642	385554	insomnia	7.72e-28	0.0910109	Excitatory_control_GAS8	119.605
rs77613369	G	A	-0.325783	0.00803217	0.889983	16	73294346	0.0082065	0.3277	380533	insomnia	7.97e-09	0.0564705	OPCs_control_ZFHX3	33.2822
rs7777627	T	C	0.558808	0.00350614	0.615769	7	29182273	0.00538518	0.515	372108	insomnia	1.45e-08	0.0986033	Microglia_control_CPVL	32.1176
rs77900915	C	T	0.688619	0.00240288	0.922046	10	131364237	0.00999428	0.81	372244	insomnia	1.02e-09	0.112762	Excitatory_control_MGMT	37.2931
rs7804663	C	T	0.528304	-0.00984834	0.175471	7	76568022	0.00683128	0.1494	384468	insomnia	5.78e-09	0.0907256	Oligodendrocytes_control_CCDC146	33.9085
rs78256546	A	G	-0.402248	0.00390762	0.814569	7	99952970	0.0065061	0.5481	386492	insomnia	5.19e-14	0.0534405	Excitatory_control_PILRB	56.6563
rs78306991	G	A	-1.24962	0.000700245	0.888433	11	18471371	0.0085204	0.9345	385800	insomnia	1.14e-24	0.121868	Oligodendrocytes_control_LDHC	105.141
rs7838174	C	T	-0.45497	0.00803217	0.900335	8	117715731	0.00880595	0.3617	386656	insomnia	2.06e-08	0.0811403	Oligodendrocytes_control_UTP23	31.4407
rs7840284	A	G	-0.244797	-0.0107577	0.350638	8	95735978	0.00534599	0.04419	385862	insomnia	4.1e-09	0.0416318	Excitatory_control_DPY19L4	34.5749
rs7842133	T	C	0.493287	-0.00697561	0.78	8	75864139	0.00652984	0.2854	386943	insomnia	6.07e-09	0.0848333	OPCs_control_CRISPLD1	33.8117
rs7847302	T	C	0.450641	-0.0109399	0.646766	9	4677453	0.00551094	0.04713	381490	insomnia	1.01e-10	0.0696997	Astrocytes_control_SPATA6L	41.8022
rs7851730	T	C	0.578519	0.020713	0.819177	9	14650684	0.00672186	0.00206	386352	insomnia	1.57e-10	0.0904176	Oligodendrocytes_control_ZDHHC21	40.9382
rs78569821	A	C	-1.13854	0.0106566	0.928682	19	51996959	0.00986429	0.28	386150	insomnia	5.12e-09	0.194849	Inhibitory_control_FPR1	34.1425
rs7860297	A	G	-0.591624	-0.00399202	0.83689	9	95088204	0.00658398	0.5443	386146	insomnia	4.38e-10	0.0948136	OPCs_control_CENPP	38.9359
rs7860297	A	G	-0.900423	-0.00399202	0.83689	9	95088204	0.00658398	0.5443	386146	insomnia	7.71e-20	0.0987606	Inhibitory_control_CENPP	83.1238
rs7860297	A	G	-0.327463	-0.00399202	0.83689	9	95088204	0.00658398	0.5443	386146	insomnia	1.48e-10	0.0511068	Excitatory_control_ASPN	41.0551
rs7860297	A	G	-1.20402	-0.00399202	0.83689	9	95088204	0.00658398	0.5443	386146	insomnia	1.04e-19	0.132528	Oligodendrocytes_control_CENPP	82.5379
rs7860297	A	G	-0.370563	-0.00399202	0.83689	9	95088204	0.00658398	0.5443	386146	insomnia	1.06e-10	0.0573795	Excitatory_control_OGN	41.7071
rs7860297	A	G	-0.488785	-0.00399202	0.83689	9	95088204	0.00658398	0.5443	386146	insomnia	4.18e-10	0.0782435	Oligodendrocytes_control_ASPN	39.0247
rs7860297	A	G	-0.38551	-0.00399202	0.83689	9	95088204	0.00658398	0.5443	386146	insomnia	2.64e-08	0.0692893	Excitatory_control_ECM2	30.9555
rs7860297	A	G	-1.04852	-0.00399202	0.83689	9	95088204	0.00658398	0.5443	386146	insomnia	1.02e-26	0.0979946	Excitatory_control_CENPP	114.486
rs7866888	C	A	-0.6854	0.00934352	0.598939	9	33524775	0.0052056	0.07267	382295	insomnia	4.65e-18	0.0791314	Inhibitory_control_ANKRD18B	75.0223
rs78750835	C	A	-0.354234	-0.0246926	0.919244	20	18547947	0.0096144	0.01022	386781	insomnia	3.53e-08	0.0642542	Excitatory_control_SEC23B	30.3932
rs7893456	T	C	-0.60097	0.00250313	0.882764	10	5007862	0.00799451	0.7542	386483	insomnia	3.96e-08	0.109415	Inhibitory_control_AKR1C2	30.1684
rs7900562	G	A	0.487922	0.0126801	0.525869	10	16505606	0.00513685	0.01357	385741	insomnia	4.71e-10	0.0783379	Astrocytes_control_PTER	38.7934
rs7908468	T	C	-0.429564	-0.000100005	0.473629	10	81758718	0.00782258	0.9898	386988	insomnia	2.31e-09	0.0719053	Astrocytes_control_SFTPD	35.689
rs79182040	T	C	-0.736486	0.0123763	0.830798	22	31063641	0.00682099	0.06961	378103	insomnia	2.79e-08	0.132605	Microglia_control_OSBP2	30.8469
rs79247094	G	A	-0.937498	-0.001998	0.882045	2	48554955	0.00721707	0.7819	386988	insomnia	9.06e-13	0.131226	OPCs_control_FOXN2	51.0389
rs7934110	A	G	-0.505875	-0.00498754	0.657804	11	13009700	0.00537331	0.3533	378294	insomnia	4.66e-11	0.0768645	Excitatory_control_LINC00958	43.3146
rs79375472	A	C	0.637769	0.00260339	0.719655	12	12889125	0.00558808	0.6413	385365	insomnia	1.16e-13	0.085944	Astrocytes_control_APOLD1	55.0675
rs7941236	G	A	0.259855	0.00598207	0.400399	11	74189045	0.00535106	0.2636	383692	insomnia	7.14e-10	0.0421633	Excitatory_control_POLD3	37.9833
rs7952506	T	C	0.592385	-0.0143018	0.47118	11	85857639	0.00510243	0.005064	385589	insomnia	7.66e-11	0.091035	Microglia_control_PICALM	42.3439
rs7952660	T	G	-0.22519	0.00672255	0.544336	11	30378694	0.00512366	0.1895	380302	insomnia	3.7e-08	0.0409087	Oligodendrocytes_control_ARL14EP	30.3016
rs7955800	T	C	0.341213	-0.00501254	0.451855	12	14914045	0.00519709	0.3348	382058	insomnia	3.89e-10	0.0545217	Excitatory_control_C12orf60	39.1662
rs7966231	C	T	0.916137	-0.0121738	0.172867	12	10696297	0.00686461	0.07616	386141	insomnia	1.03e-10	0.141761	Inhibitory_control_KLRC1	41.7644
rs7978725	G	A	0.509323	-0.0109399	0.887861	12	117477816	0.00824207	0.1844	384992	insomnia	1.56e-11	0.0755384	Excitatory_control_TESC	45.4623
rs79817130	T	G	-1.12472	0.00410843	0.941764	11	128507688	0.0112308	0.7145	380539	insomnia	2.88e-08	0.202702	Microglia_control_BARX2	30.7876
rs7982534	A	G	-0.612864	0.0129162	0.472866	13	76131985	0.00496677	0.009308	386988	insomnia	6.46e-15	0.0786258	Inhibitory_control_COMMD6	60.7571
rs79909665	G	A	0.551907	-0.00598207	0.893059	1	55372365	0.00766447	0.4351	386644	insomnia	3.04e-08	0.0996404	Oligodendrocytes_control_DHCR24	30.6804
rs8000680	G	T	-0.518022	0.00498754	0.369034	13	50163588	0.00537331	0.3533	385573	insomnia	1.43e-11	0.0766837	Oligodendrocytes_control_RCBTB1	45.6342
rs80018890	C	T	0.47979	0.00330546	0.9452	12	49377033	0.0115166	0.7741	380275	insomnia	9.69e-09	0.0836447	Excitatory_control_CCDC65	32.9023
rs8002861	G	A	0.585818	0.00270365	0.570604	13	44474517	0.0050886	0.5952	385848	insomnia	1.47e-15	0.0734165	Astrocytes_control_CCDC122	63.6706
rs800459	G	A	0.434989	-0.00130085	0.40247	4	24835075	0.00515042	0.8006	383373	insomnia	2.75e-09	0.0731608	Oligodendrocytes_control_CCDC149	35.3509
rs80050626	C	T	-0.814401	0.0149106	0.920647	17	1824542	0.00952799	0.1176	380651	insomnia	2.35e-08	0.14584	Astrocytes_control_RTN4RL1	31.1834
rs80078717	A	G	-0.439443	-0.00498754	0.905428	19	52928725	0.00903425	0.5809	386277	insomnia	6.26e-11	0.0672201	Excitatory_control_ZNF534	42.7373
rs80078717	A	G	-0.6504	-0.00498754	0.905428	19	52928725	0.00903425	0.5809	386277	insomnia	4.37e-10	0.104229	OPCs_control_ZNF534	38.9387
rs80078717	A	G	-0.513273	-0.00498754	0.905428	19	52928725	0.00903425	0.5809	386277	insomnia	2.97e-08	0.0925936	Inhibitory_control_ZNF534	30.728
rs80105582	A	G	-0.80168	0.00300451	0.891599	11	18401867	0.00815928	0.7127	386089	insomnia	2.95e-10	0.12722	OPCs_control_LDHC	39.709
rs80113596	G	A	-1.52706	-0.0168571	0.948497	2	169353462	0.0113417	0.1372	382830	insomnia	7.02e-09	0.263724	Pericytes_control_G6PC2	33.5283
rs80122877	G	A	-1.33849	0.00370686	0.937187	18	29143378	0.0108156	0.7318	376941	insomnia	3.95e-08	0.243667	Endothelial_control_DSC3	30.1746
rs8017689	T	C	0.582228	0.00060018	0.660481	14	88949786	0.00562314	0.915	386728	insomnia	1.5e-22	0.0595881	Excitatory_control_SPATA7	95.4701
rs8020176	T	C	0.779441	0.016536	0.88833	14	60262027	0.00852515	0.05242	383718	insomnia	1.15e-10	0.120922	Excitatory_control_PCNX4	41.5489
rs8037112	A	G	-0.636218	-0.00430927	0.379711	15	32962759	0.00527306	0.4138	380930	insomnia	3.65e-09	0.107845	Oligodendrocytes_control_GREM1	34.8029
rs805276	A	G	0.533909	-0.00498754	0.748206	6	31664219	0.00566458	0.3786	386967	insomnia	4.87e-19	0.0598877	Excitatory_control_LY6G5C	79.4804
rs805287	A	G	0.441986	-0.0009995	0.727494	6	31678730	0.00416391	0.8103	386988	insomnia	8.5e-09	0.0767581	Inhibitory_control_LY6G5C	33.1566
rs8060487	G	A	-0.698959	0.00299551	0.293425	16	13134616	0.00559379	0.5923	385016	insomnia	1.15e-08	0.122473	OPCs_control_SHISA9	32.5703
rs8075503	C	A	0.4716	0.0112632	0.582825	17	10601321	0.00517689	0.02958	384441	insomnia	6.72e-10	0.0764018	Oligodendrocytes_control_TMEM220	38.1014
rs8091374	G	A	-0.442368	0.002002	0.839372	18	71904385	0.00707823	0.7773	373246	insomnia	3.27e-09	0.0747599	Oligodendrocytes_control_CYB5A	35.0131
rs8097892	C	T	0.428179	-0.00598207	0.552283	18	11905953	0.00543221	0.2708	386988	insomnia	3.55e-12	0.0615742	Oligodendrocytes_control_MPPE1	48.3564
rs8097892	C	T	0.37794	-0.00598207	0.552283	18	11905953	0.00543221	0.2708	386988	insomnia	7.15e-18	0.0438825	Excitatory_control_MPPE1	74.1761
rs8097892	C	T	0.305749	-0.00598207	0.552283	18	11905953	0.00543221	0.2708	386988	insomnia	4.52e-11	0.0464238	Inhibitory_control_MPPE1	43.3758
rs8097892	C	T	0.301887	-0.00598207	0.552283	18	11905953	0.00543221	0.2708	386988	insomnia	2.81e-12	0.0432082	Astrocytes_control_MPPE1	48.8154
rs8097892	C	T	0.349394	-0.00598207	0.552283	18	11905953	0.00543221	0.2708	386988	insomnia	1.52e-11	0.0517924	OPCs_control_MPPE1	45.5092
rs8101498	T	G	-0.725176	0.00250313	0.845479	19	43421078	0.00684003	0.7144	386411	insomnia	7.59e-10	0.117851	Oligodendrocytes_control_PSG1	37.8633
rs8102320	A	G	0.411004	-0.00783058	0.43772	19	21936885	0.00512861	0.1268	385349	insomnia	1.98e-13	0.0559179	Inhibitory_control_ZNF100	54.0244
rs8102320	A	G	0.528945	-0.00783058	0.43772	19	21936885	0.00512861	0.1268	385349	insomnia	3.62e-18	0.0608676	Oligodendrocytes_control_ZNF100	75.5176
rs8104808	A	C	-0.353375	-0.001998	0.618658	19	52887427	0.00452618	0.6589	386988	insomnia	1.35e-10	0.0550279	Excitatory_control_ZNF880	41.2388
rs8106090	A	G	0.31043	-0.00399202	0.513096	19	44371210	0.00568042	0.4822	385401	insomnia	1.79e-08	0.0551233	Astrocytes_control_ZNF404	31.7145
rs8109791	T	C	-0.388481	0.0113643	0.589395	19	14941996	0.00517462	0.02808	386475	insomnia	3.17e-08	0.0702293	Oligodendrocytes_control_ADGRE2	30.5988
rs8127748	A	G	0.262403	0.00796817	0.450646	21	40862333	0.00494357	0.107	386298	insomnia	3.95e-09	0.0445783	Excitatory_control_B3GALT5	34.6491
rs8135509	C	T	-0.77625	0.00732678	0.826645	22	43809158	0.00671883	0.2755	385358	insomnia	4.79e-11	0.118021	Oligodendrocytes_control_MPPED1	43.2601
rs814861	T	G	0.373308	-0.0009995	0.621103	1	76098631	0.00772101	0.897	375255	insomnia	2.67e-10	0.0590948	Excitatory_control_MSH4	39.9058
rs8176742	C	T	0.58583	0.0119714	0.758573	9	136131437	0.00591073	0.04283	386761	insomnia	2.1e-13	0.0797862	Excitatory_control_ABO	53.9123
rs823080	G	A	-0.716965	-0.00399202	0.600981	1	205789282	0.00468038	0.3937	385452	insomnia	7.45e-13	0.0999814	Endothelial_control_PM20D1	51.423
rs823080	G	A	-0.689365	-0.00399202	0.600981	1	205789282	0.00468038	0.3937	385452	insomnia	6.7e-15	0.0884937	Oligodendrocytes_control_PM20D1	60.6839
rs823080	G	A	-0.457319	-0.00399202	0.600981	1	205789282	0.00468038	0.3937	385452	insomnia	6.63e-13	0.0636321	Astrocytes_control_PM20D1	51.652
rs823080	G	A	-0.79788	-0.00399202	0.600981	1	205789282	0.00468038	0.3937	385452	insomnia	1.12e-25	0.0761668	Inhibitory_control_PM20D1	109.734
rs841227	C	T	-0.294601	-0.00541463	0.473153	16	4734513	0.00508547	0.287	382832	insomnia	1.48e-12	0.0416344	Oligodendrocytes_control_MGRN1	50.0684
rs867582	T	C	-0.479532	-0.00498754	0.594041	7	45619031	0.00477155	0.2959	386416	insomnia	5.33e-11	0.0730832	Astrocytes_control_ADCY1	43.0526
rs868314	A	G	-0.564447	-0.00995033	0.880548	10	43752644	0.00790805	0.2083	386616	insomnia	3.02e-13	0.077392	Oligodendrocytes_control_CSGALNACT2	53.1929
rs869432	A	C	0.676952	-0.00498754	0.584266	10	112502662	0.00478045	0.2968	375824	insomnia	3.9e-10	0.108174	Endothelial_control_RBM20	39.1625
rs869464	T	G	-0.623884	0.00796817	0.406985	3	126268953	0.00545098	0.1438	382827	insomnia	1.68e-10	0.0976617	Microglia_control_CHST13	40.8092
rs875999	A	G	0.544819	0.00598207	0.435466	4	163055937	0.00491326	0.2234	384001	insomnia	1.06e-10	0.0843623	Astrocytes_control_FSTL5	41.707
rs8768	A	C	-0.446632	-0.00430927	0.240863	1	26497340	0.00596456	0.47	386988	insomnia	1.15e-11	0.0658164	Excitatory_control_CNKSR1	46.0501
rs893362	C	T	0.348286	-0.00682323	0.317353	3	53847794	0.00541205	0.2074	385166	insomnia	7.33e-10	0.0565505	Excitatory_control_CHDH	37.9313
rs896955	C	T	0.594216	0.00451016	0.862744	8	144658370	0.00755646	0.5506	385272	insomnia	4.33e-09	0.101209	OPCs_control_NAPRT	34.471
rs896955	C	T	0.56286	0.00451016	0.862744	8	144658370	0.00755646	0.5506	385272	insomnia	2.1e-10	0.0885841	Oligodendrocytes_control_NAPRT	40.3729
rs908150	T	C	-0.692557	0.00964638	0.580342	17	64536433	0.00526392	0.06687	378611	insomnia	4.14e-12	0.0999007	Oligodendrocytes_control_PRKCA	48.059
rs908225	T	C	0.600051	-0.00250313	0.31111	11	1313229	0.00542817	0.6447	385451	insomnia	2.13e-08	0.107136	Excitatory_control_MUC5B	31.3694
rs908817	G	A	-0.33532	-0.0009995	0.664083	15	76639191	0.00408268	0.8066	385782	insomnia	9.83e-11	0.0518302	Excitatory_control_SCAPER	41.8556
rs909217	G	A	0.645942	-0.00712532	0.247965	11	71146577	0.00616793	0.248	384944	insomnia	8e-16	0.0801993	OPCs_control_DHCR7	64.8703
rs909688	A	G	0.267851	0.0168571	0.302114	22	50689030	0.00549649	0.002163	382847	insomnia	4.4e-10	0.0429308	Excitatory_control_MAPK12	38.9267
rs911549	T	C	-0.419957	-0.00250313	0.371596	14	103984537	0.00532494	0.6383	383774	insomnia	3.68e-08	0.0762801	Excitatory_control_MARK3	30.31
rs912930	T	C	-0.342685	-0.00299551	0.545578	13	36830662	0.00521506	0.5657	378307	insomnia	9.97e-09	0.0597918	Excitatory_control_SOHLH2	32.8479
rs914187	T	C	0.610188	-0.00150113	0.395415	21	42619749	0.00530735	0.7773	378791	insomnia	4.29e-13	0.0842092	Endothelial_control_BACE2	52.5059
rs917761	C	T	0.638279	0.0119286	0.343423	7	117859053	0.0051518	0.02059	386181	insomnia	1.38e-13	0.0862796	Oligodendrocytes_control_ANKRD7	54.7274
rs9264645	G	A	-0.480007	-0.00853633	0.351791	6	31238524	0.00576526	0.1387	385539	insomnia	1.46e-10	0.0748927	Inhibitory_control_HLA-B	41.0786
rs9264664	C	T	0.422816	-0.00803217	0.3511	6	31239227	0.00574256	0.1619	386763	insomnia	1.81e-09	0.0703011	Astrocytes_control_HLA-C	36.1725
rs926822	A	G	0.769542	-0.00652122	0.194399	20	996293	0.00641813	0.3096	381257	insomnia	6.27e-10	0.124453	OPCs_control_RSPO4	38.2345
rs926822	A	G	0.671621	-0.00652122	0.194399	20	996293	0.00641813	0.3096	381257	insomnia	2.54e-09	0.112707	Oligodendrocytes_control_RSPO4	35.5098
rs9270985	T	C	0.754294	-0.00762903	0.273585	6	32574027	0.00587637	0.1942	386935	insomnia	1.06e-10	0.116793	Endothelial_control_HLA-DRB1	41.7109
rs9272116	T	C	0.696259	0.00873807	0.504118	6	32600404	0.00539027	0.105	386988	insomnia	4.9e-12	0.100785	Endothelial_control_HLA-DRB5	47.7258
rs9272146	T	C	0.596664	0.00863719	0.529548	6	32600914	0.0053678	0.1076	386791	insomnia	4.25e-10	0.095547	Microglia_control_HLA-DRB5	38.9965
rs928976	C	T	-0.66589	-0.0148886	0.678211	6	33049211	0.00563887	0.008282	386988	insomnia	6.06e-15	0.085341	Excitatory_control_HLA-DPB1	60.8822
rs9315704	A	G	-1.01461	-0.018979	0.148132	13	40140215	0.00714863	0.007933	386269	insomnia	5.08e-18	0.117274	Oligodendrocytes_control_LHFPL6	74.8508
rs9322158	G	A	-0.615844	0.0036065	0.809939	6	149242095	0.00652577	0.5805	386696	insomnia	1.18e-11	0.0907996	Astrocytes_control_UST	46.0016
rs9322188	C	T	-0.188711	0.00501254	0.679085	6	149909491	0.00545326	0.358	386988	insomnia	4.48e-09	0.0321738	Oligodendrocytes_control_LATS1	34.4023
rs9327885	G	A	0.417918	0.00672255	0.844604	5	102888333	0.00717367	0.3487	373887	insomnia	3.71e-13	0.057519	Excitatory_control_NUDT12	52.7908
rs9331657	T	C	-0.360646	0.00380724	0.55218	6	149890053	0.00518409	0.4627	376981	insomnia	5.93e-09	0.0619805	Excitatory_control_LATS1	33.8573
rs9347277	C	T	0.587449	0.002002	0.696676	6	157876915	0.0055519	0.7184	375930	insomnia	1.54e-13	0.079562	Oligodendrocytes_control_ZDHHC14	54.5165
rs9347685	G	A	0.484371	-0.0100503	0.230808	6	163169502	0.00615329	0.1024	381404	insomnia	3.47e-12	0.069623	Excitatory_control_PACRG	48.4005
rs936513	C	T	-0.883486	0.00491204	0.548633	11	10481667	0.00508973	0.3345	383588	insomnia	8.42e-17	0.106122	Oligodendrocytes_control_AMPD3	69.3089
rs9369363	C	A	0.534231	-0.00934352	0.311623	6	42478932	0.0054855	0.08851	383983	insomnia	1.55e-11	0.0792276	Inhibitory_control_PRPH2	45.468
rs9438393	A	G	-0.63993	-0.00399202	0.600682	1	205782718	0.00487649	0.413	384909	insomnia	8.35e-13	0.0894345	OPCs_control_PM20D1	51.1981
rs9438393	A	G	-0.733176	-0.00399202	0.600682	1	205782718	0.00487649	0.413	384909	insomnia	4.34e-23	0.0740902	Excitatory_control_PM20D1	97.9255
rs9509675	A	G	-0.38458	0.00350614	0.767915	13	21959895	0.00592327	0.5539	385110	insomnia	2.01e-09	0.0641305	Excitatory_control_ZDHHC20	35.962
rs9532275	A	G	0.738412	0.00440971	0.608815	13	39338062	0.00521184	0.3975	386988	insomnia	1.11e-20	0.079183	Astrocytes_control_FREM2	86.9629
rs9535526	C	T	-0.503638	0.00399202	0.403245	13	51484445	0.00522783	0.4451	386988	insomnia	4.64e-19	0.0564581	Excitatory_control_RNASEH2B	79.5765
rs953770	T	C	-0.509162	0.00399202	0.474031	7	2400306	0.00495562	0.4205	386321	insomnia	1.95e-10	0.0799916	Inhibitory_control_SNX8	40.5156
rs9547083	G	A	-0.557965	0.00370686	0.749996	13	36864697	0.00584706	0.5261	385175	insomnia	1.61e-10	0.0872533	Inhibitory_control_SOHLH2	40.8931
rs9549650	A	C	1.11141	0.00895974	0.210014	13	113715787	0.00598984	0.1347	380863	insomnia	5.08e-14	0.147598	Oligodendrocytes_control_MCF2L	56.7005
rs9561641	A	G	-0.491717	0.0129162	0.320631	13	95250528	0.00569954	0.02344	374334	insomnia	3.67e-09	0.0833657	Oligodendrocytes_control_GPR180	34.7901
rs958325	C	T	-0.776319	-0.00995033	0.519011	4	89209681	0.00536191	0.06349	380642	insomnia	6.17e-24	0.0769459	Astrocytes_control_PPM1K-DT	101.791
rs958325	C	T	-0.387201	-0.00995033	0.519011	4	89209681	0.00536191	0.06349	380642	insomnia	4.42e-12	0.0559291	Excitatory_control_PPM1K-DT	47.9288
rs958325	C	T	-0.753436	-0.00995033	0.519011	4	89209681	0.00536191	0.06349	380642	insomnia	2.33e-18	0.0862053	OPCs_control_PPM1K-DT	76.388
rs9630108	G	A	-0.657366	0.001998	0.45777	10	124017217	0.00505749	0.6928	385385	insomnia	6.98e-20	0.072017	Excitatory_control_BTBD16	83.319
rs9648781	A	C	0.545067	-0.00895974	0.521346	7	141455436	0.00482665	0.06341	386683	insomnia	1.56e-11	0.0808407	Excitatory_control_MGAM	45.4611
rs9659428	G	A	0.573182	-0.00299551	0.540736	1	240556931	0.00587599	0.6102	386510	insomnia	3.04e-08	0.103476	Endothelial_control_GREM2	30.6834
rs966145	A	G	0.226261	-0.0227395	0.632339	3	158365250	0.0053732	2.316e-05	386983	insomnia	2.3e-15	0.0285533	Excitatory_control_GFM1	62.7927
rs966724	T	G	-0.454605	0.0009995	0.362473	13	103347428	0.0061358	0.8706	377848	insomnia	1.07e-08	0.079496	Excitatory_control_METTL21C	32.7023
rs967287	A	G	0.636383	0.00521357	0.5505	2	157144154	0.00515454	0.3118	386406	insomnia	8.41e-13	0.088951	Astrocytes_control_LINC01876	51.1842
rs972353	T	C	0.429436	-0.00995033	0.66804	11	61717715	0.00554968	0.07298	386759	insomnia	3.61e-08	0.0779554	Astrocytes_control_BEST1	30.3462
rs9782	T	C	-0.579918	0.0125788	0.680814	12	103351826	0.00559218	0.02449	372022	insomnia	1.86e-12	0.0823183	Excitatory_control_PAH	49.6294
rs9782	T	C	-0.416727	0.0125788	0.680814	12	103351826	0.00559218	0.02449	372022	insomnia	3.17e-08	0.0753316	Inhibitory_control_PAH	30.6019
rs9784019	A	G	-0.680641	0.00290421	0.876076	2	231035575	0.00757961	0.7016	386977	insomnia	1.26e-09	0.112094	Oligodendrocytes_control_SLC16A14	36.8697
rs9787775	T	G	-1.13596	0.00120072	0.719497	11	74675896	0.00550695	0.8274	385711	insomnia	2.11e-35	0.0914843	Excitatory_control_XRRA1	154.183
rs9790869	G	T	-0.521202	-0.00399202	0.664805	5	64858580	0.00576434	0.4886	386988	insomnia	2.14e-15	0.0657009	Excitatory_control_CENPK	62.9318
rs9803979	G	A	0.64908	-0.00320513	0.338205	1	45999282	0.00540929	0.5535	386951	insomnia	1.22e-13	0.0875404	Oligodendrocytes_control_CCDC163	54.9768
rs9819246	C	T	0.713253	-0.00796817	0.575226	3	100264716	0.00490827	0.1045	384352	insomnia	4.01e-15	0.0908083	Oligodendrocytes_control_TMEM45A	61.6929
rs9824435	C	T	0.427911	0.0168571	0.171337	3	49674343	0.00653509	0.009895	386944	insomnia	4.7e-08	0.0783363	Astrocytes_control_GMPPB	29.8388
rs982565	T	C	-0.584847	-0.00498754	0.553237	6	72323926	0.00510845	0.3289	382401	insomnia	3.9e-12	0.0842613	Astrocytes_control_RIMS1	48.1757
rs982804	T	C	-0.400319	0.00210221	0.562239	4	81207039	0.00514262	0.6827	382146	insomnia	2.14e-12	0.0569836	Excitatory_control_CFAP299	49.3529
rs9854126	A	G	-0.618069	0.0210194	0.868575	3	150847047	0.00740682	0.004542	386988	insomnia	6.15e-09	0.10633	Excitatory_control_GPR171	33.788
rs985849	C	T	-1.09634	0.0009995	0.150115	15	76261993	0.00617431	0.8714	386832	insomnia	2.7e-25	0.105498	Excitatory_control_NRG4	107.994
rs9881437	A	G	0.587123	0.00399202	0.493296	3	132562866	0.0057963	0.491	382417	insomnia	2.46e-14	0.077009	Oligodendrocytes_control_TMEM108	58.1267
rs9890200	A	C	0.335046	-0.001998	0.626544	17	48624523	0.00685517	0.7707	385260	insomnia	4.92e-09	0.0572741	Astrocytes_control_SPATA20	34.2209
rs9891288	A	G	0.965549	-0.00762903	0.115999	17	48493888	0.00817824	0.3509	382637	insomnia	2.11e-09	0.161209	Excitatory_control_EME1	35.8733
rs9901930	G	T	0.691508	-0.00732678	0.24241	17	4570233	0.0059697	0.2197	386334	insomnia	6.2e-12	0.100585	Excitatory_control_ALOX15	47.2639
rs9912877	A	G	-0.349709	-0.00299551	0.825347	17	35374027	0.00641245	0.6404	386275	insomnia	2.82e-08	0.0629877	Oligodendrocytes_control_AATF	30.825
rs9917991	G	A	-0.400118	-0.00299551	0.679715	4	190891647	0.0065156	0.6457	386238	insomnia	1.62e-12	0.0566445	Oligodendrocytes_control_FRG1-DT	49.8955
rs9927553	T	C	0.285275	0.00692392	0.500735	16	70409844	0.00507066	0.1721	385505	insomnia	1.87e-11	0.0424765	Astrocytes_control_EXOSC6	45.1054
rs9928085	C	T	0.641013	0.002002	0.735848	16	84074978	0.00574321	0.7274	382460	insomnia	1.05e-11	0.0942722	Excitatory_control_SLC38A8	46.2345
rs9932429	C	A	-0.598098	0.0119286	0.461469	16	55564010	0.00514282	0.02037	380935	insomnia	2.36e-15	0.0755107	Excitatory_control_LPCAT2	62.7377
rs9941087	G	A	-0.769822	0.00521357	0.651101	16	72118324	0.00539546	0.3339	384515	insomnia	2.17e-13	0.104907	Astrocytes_control_HP	53.8482
rs9963191	T	C	0.448804	-0.001998	0.744952	18	5724014	0.00630171	0.7512	379395	insomnia	9.64e-10	0.0733914	Excitatory_control_MIR3976HG	37.3957
rs9975113	A	G	0.423823	-0.0009995	0.690634	21	45725715	0.00479263	0.8348	383841	insomnia	9.37e-10	0.0692551	Oligodendrocytes_control_PFKL	37.4511
rs9984986	A	G	-0.698189	-0.00310481	0.311934	21	47638463	0.00538594	0.5643	385657	insomnia	2.96e-09	0.117661	Oligodendrocytes_control_LSS	35.2112
