# Supplementary material
Source: Research Square preprint supplement (doi:10.21203/rs.3.rs-9371633/v1)
Supplement: Supplementary file 4 [file 7317ed3ebe01f3f0b3d80ef7.xlsx]

## Sheet: Excitatory_control_GFM1_kb100_l
PP.H0.abf	PP.H1.abf	PP.H2.abf	PP.H3.abf	PP.H4.abf	chr	pos	lead_snp	p1	p2	p12
8.47274e-11	6.44154e-10	0.0329358	0.249682	0.717382	3	158642266	rs13317399	0.0001	0.0001	1e-05
